# Supplementary material
Source: PubMed Central journal article supplement (PMC6931396)
Supplement: NIHMS1061971-supplement-supplementary_reference.pdf [file NIHMS1061971-supplement-supplementary_reference.pdf]

# Optimization of Peptidomimetics as Selective Inhibitors for the $\beta$ -Catenin/T-Cell Factor Protein–Protein Interaction

Zhen Wang,<sup>†,#</sup> Min Zhang,<sup>†,#</sup> Jin Wang,<sup>†</sup> Haitao Ji<sup>†,‡,\*</sup>

<sup>†</sup>Drug Discovery Department, H. Lee Moffitt Cancer Center and Research Institute, Tampa, Florida 33612–9497, United States.

<sup>‡</sup>Departments of Oncologic Sciences and Chemistry, University of South Florida, Tampa, Florida 33612–9497, United States.

## Table of Contents

|                                 |          |
|---------------------------------|----------|
| Supplementary Note 1.....       | S2       |
| Supplementary Note 2.....       | S2–S3    |
| Supplementary Table S1.....     | S3       |
| Supplementary Figure S1.....    | S3       |
| Supplementary Figure S2.....    | S4       |
| Supplementary Figure S3.....    | S4       |
| Supplementary Figure S4.....    | S5       |
| Supplementary Figure S5.....    | S6       |
| Supplementary Figure S6.....    | S6       |
| Supplementary Figure S7.....    | S7       |
| Supplementary Figure S8.....    | S8       |
| Supplementary Scheme S1.....    | S9       |
| Supplementary Scheme S2.....    | S9       |
| Supplementary Scheme S3.....    | S10      |
| Supplementary Scheme S4.....    | S10      |
| Supplementary Scheme S5.....    | S10      |
| Supplementary Scheme S6.....    | S11      |
| Supplementary Scheme S7.....    | S11      |
| Supplementary Scheme S8.....    | S12      |
| Supplementary Scheme S9.....    | S12      |
| Supplementary Scheme S10.....   | S12      |
| Supplementary Scheme S11.....   | S13      |
| Supplementary Scheme S12.....   | S13      |
| Supplementary Scheme S13.....   | S13      |
| Supplementary Scheme S14.....   | S14      |
| Supplemental Procedures.....    | S14–S45  |
| HPLC Conditions and Traces..... | S46–S61  |
| NMR Spectra.....                | S62–S118 |
| Supplementary References.....   | S119     |

### Supplementary Note 1. Chemical Stability of **1** and **21**.

The chemical stability of **1** and **21** was evaluated in three buffer solutions (pH = 5.0, 7.0, and 9.0) at 37 °C. The results were shown in the table below. The remaining percentage of compound **1** in pH = 9.0 was decreased from 98.6% to 23.1% over 24 h, indicating **1** was unstable in pH = 9.0. Compound **1** decreased from ~98.5% to 96.0% over 24 h in pH = 7.0, indicating this compound was slightly unstable in pH = 7.0. The major byproduct identified was the derivative that the methyl ester of **1** was hydrolyzed, as shown in the Scheme below. The data also revealed **1** was stable in pH = 5.0. Compound **21** is stable at all the three tested pH buffers. On the other hand, it is worth noting that the indole ring of **1** is stable under three tested conditions and air at 37 °C.

|                    | Remaining percentage (%) of <b>1</b> or <b>21</b> (pH 9.0/7.0/5.0) |                |                |                |                |
|--------------------|--------------------------------------------------------------------|----------------|----------------|----------------|----------------|
|                    | 0 h                                                                | 2 h            | 4 h            | 8 h            | 24 h           |
| Compound <b>1</b>  | 98.6/98.6/98.3                                                     | 89.6/98.5/98.3 | 83.2/98.4/98.4 | 69.7/98.4/98.4 | 23.1/96.0/98.2 |
| Compound <b>21</b> | 99.3/100/100                                                       | 99.4/100/100   | 99.4/100/100   | 99.4/100/100   | 99.6/100/100   |

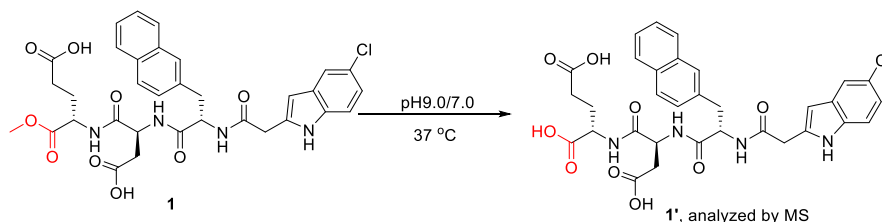

**Procedure.** The solutions of compounds **1** (400  $\mu\text{g/mL}$ ) and **21** (200  $\mu\text{g/mL}$ ) were prepared by dissolving them in pH = 5.0 (for pH = 5 experiments, 5% DMSO was added), pH = 7.0, or pH = 9.0 buffers. These buffers were purchased from Fisher Scientific and contained different components as follows: pH = 5.0 buffer (SB102-500, potassium acid phthalate, sodium hydroxide, water), pH = 7.0 buffer (SB107-500, potassium phosphate monobasic, sodium hydroxide, water), pH = 9.0 buffer (SB114-500, boric acid potassium chloride, sodium hydroxide, water). The control buffers and the compound-containing solution were bubbled with air and kept stirring at 37 °C for 24 h.<sup>1</sup> Aliquots (100  $\mu\text{L}$ ) withdrawn at the designated time points during the 24-h incubation period were analyzed by HPLC. The HPLC condition was: elute with gradient starting with 0.1% TFA in water and end with 0.1% TFA in water and acetonitrile mixture (water with 0.1% TFA : acetonitrile = 1 : 1) in 10 min, and then change to a 5-min gradient starting with 0.1% TFA in water and acetonitrile 1 : 1 mixture and ending with 100% acetonitrile, and at last elute with 100% acetonitrile for 5 min.

### Supplementary Note 2. Determination of the Intracellular Concentrations of **53** and **56**.

Following the procedure described in the previous paper (*J. Med. Chem.* **2017**, *60*, 157–169),<sup>2</sup> the intracellular concentrations of **53** and **56** in SW480 cells were determined. The calibration curves of **53** and **56** are shown in Supplementary Figure S6. The results of the HPLC analyses are shown in Supplementary Figures S7 and S8. Based on the  $\text{IC}_{50}$  values of **53** and **56** in MTS cell growth inhibition assays, the input concentration was set to 25  $\mu\text{M}$ . The solvent extraction efficiencies were determined to be 0.5 for **53** and 0.7 for **56** in MeCN/MeOH (v/v = 1:1), respectively. The cell-bound concentrations of **53** at 37 °C were determined to be 0.17 and 0.71

nmol/million cells for the 3-h and 24-h incubation in 5 mL of DMEM media with 10% FBS, respectively. The cell-bound concentration of **56** at 37 °C was determined to be 1.4 and 2.6 nmol/million cells for the 3-h and 24-h incubation in 5 mL of DMEM media with 10% FBS, respectively. Transformation of **56** into **53** was not detected under these conditions.

**Supplementary Table S1. Peptide Sequences Used in This Study.<sup>3</sup>**

| Peptides                              | Sequences                                                                                                        |
|---------------------------------------|------------------------------------------------------------------------------------------------------------------|
| Fluorescein-labeled Tcf4 45-mer       | H- <sup>7</sup> GGDDLGANDELISFKDEGEQEEKSSENSAERDLADVKSSLVNE <sup>51</sup> K(FITC)-NH <sub>2</sub>                |
| Fluorescein-labeled E-cadherin 55-mer | H- <sup>819</sup> DTDPTAPPYDSSLVFDYEGSGSEAASLSSLNSSESDKDQDYDYLNEWGNRFKKLA <sup>873</sup> K(FITC)-NH <sub>2</sub> |
| Fluorescein-labeled APC-R3 43-mer     | H- <sup>1477</sup> QRVQVLPDADTLLHFATESTPDGFSCSSLSALSLEPFIQK <sup>1519</sup> K(FITC)-NH <sub>2</sub>              |

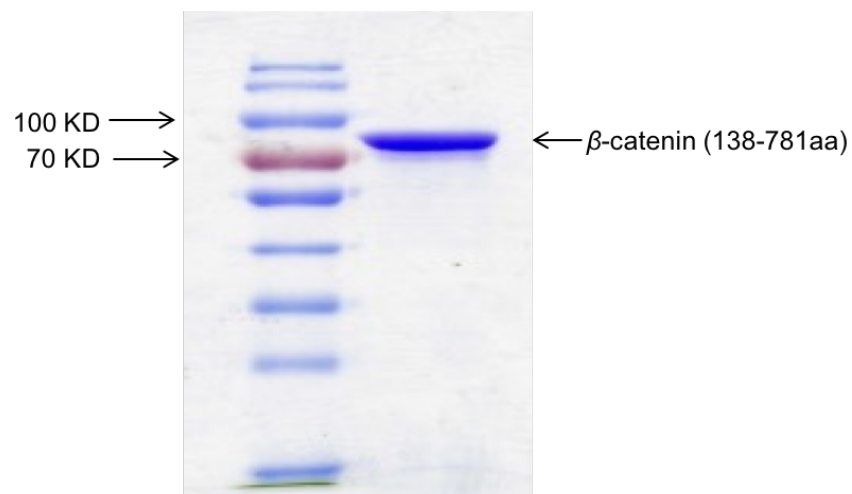

**Supplementary Figure S1.** The SDS-PAGE Gel of  $\beta$ -Catenin (residues 138–781) Used in the Assays.

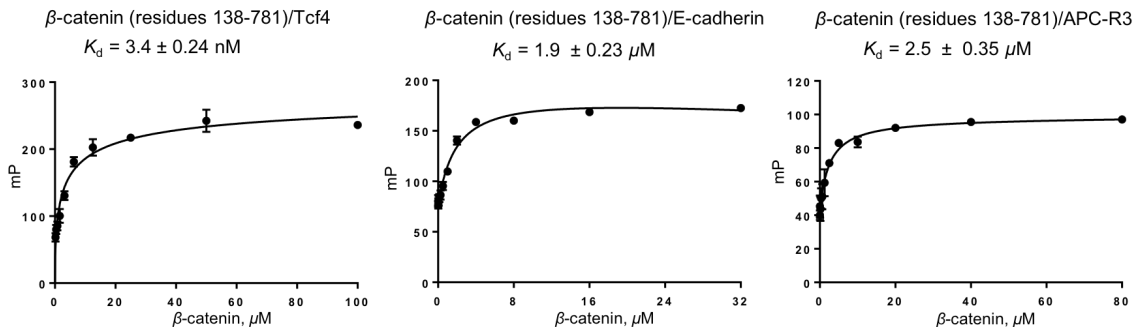

**Supplementary Figure S2.** Direct FP Titration of Fluorescein-Labeled Tcf4 45-mer, Fluorescein-Labeled E-cadherin 55-mer, and Fluorescein-Labeled APC-R3 43-mer with  $\beta$ -Catenin, and the Corresponding  $K_d$  Values.

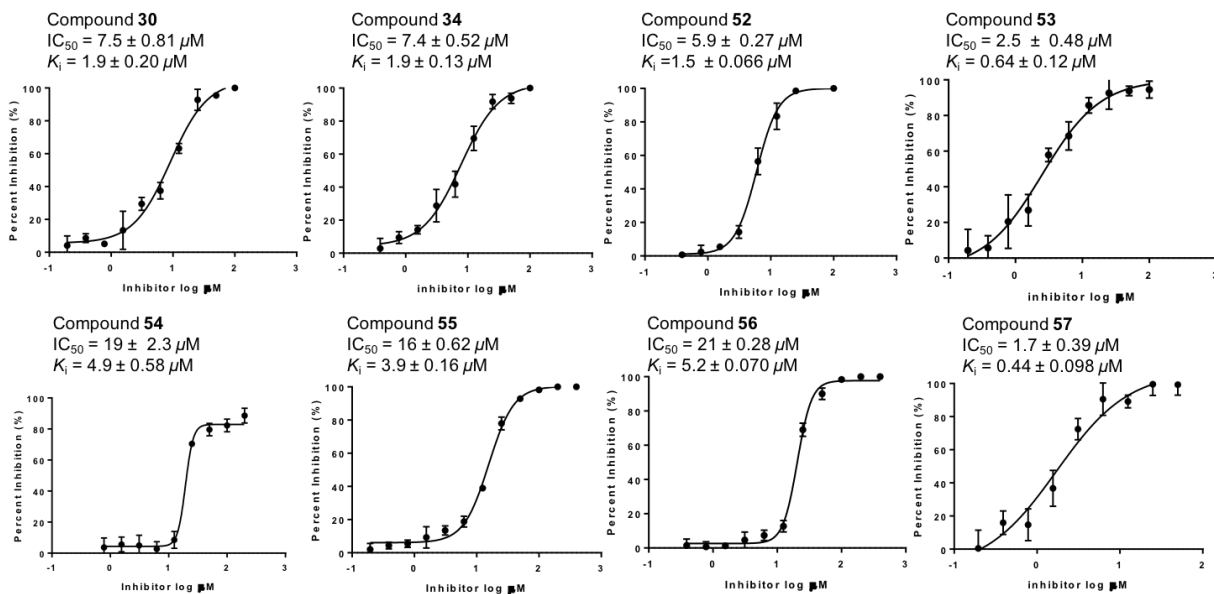

**Supplementary Figure S3.** Competitive FP Inhibition Assay Results of **30**, **34**, and **52-57**. Each set of data is expressed as mean  $\pm$  standard deviation ( $n = 3$ ).

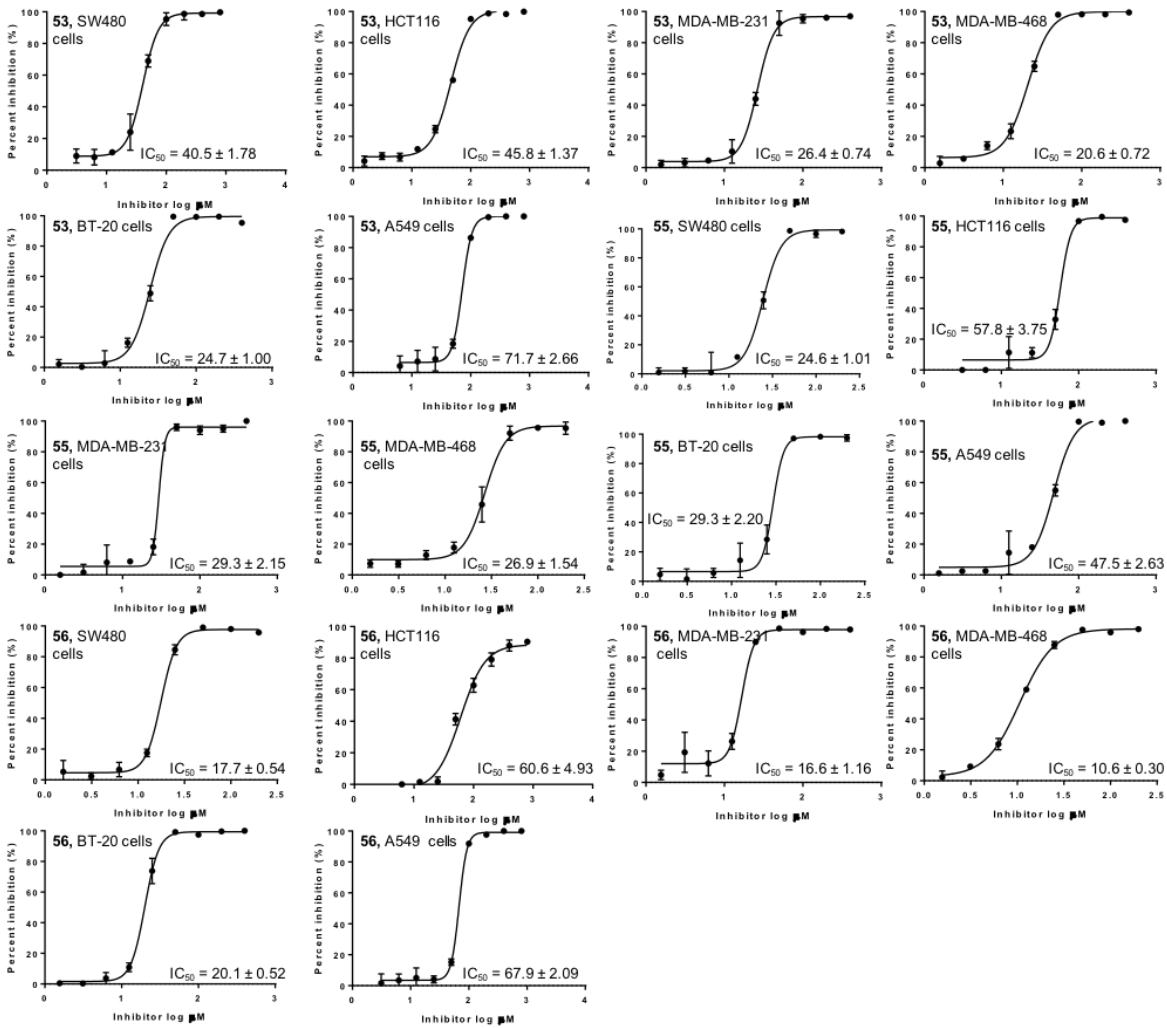

**Supplementary Figure S4.** The Effects of **53**, **55**, and **56** on Growth of Colorectal Cancer Cells (SW480 and HCT116), TNBC Cells (MDA-MB-231, MDA-MB-468, and BT-20), and Lung Cancer A549 Cells.

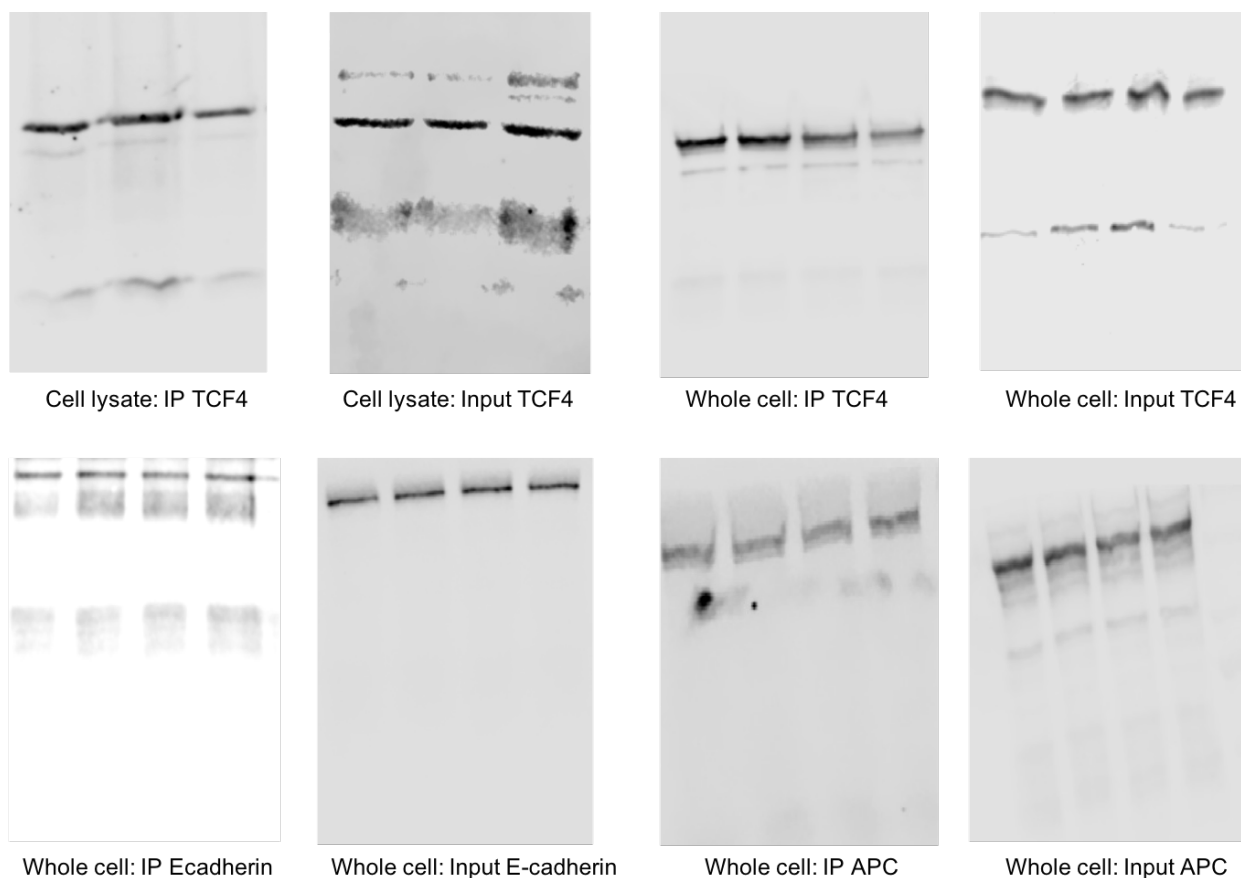

**Supplementary Figure S5.** The Full Western Blot Images of the Co-IP Experiments for Compounds **53** and **56**.

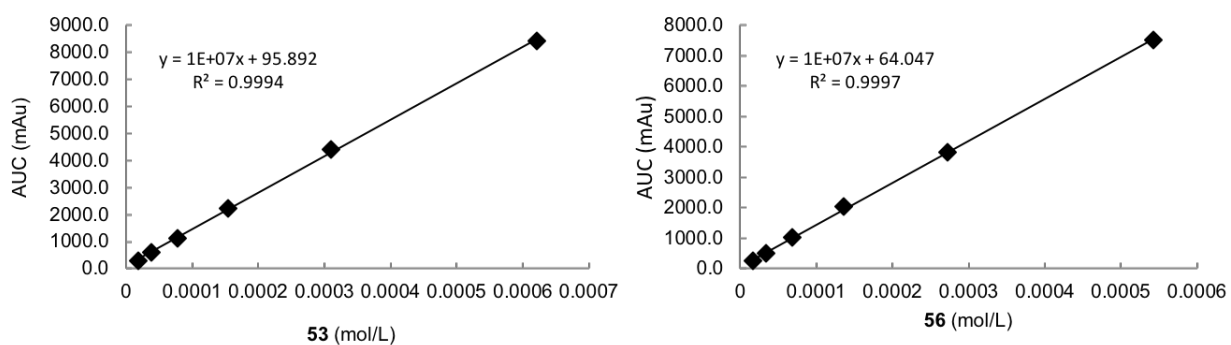

**Supplementary Figure S6.** The Calibration Curves of **53** (A) and **56** (B) for Determination of Their Intracellular Concentrations.

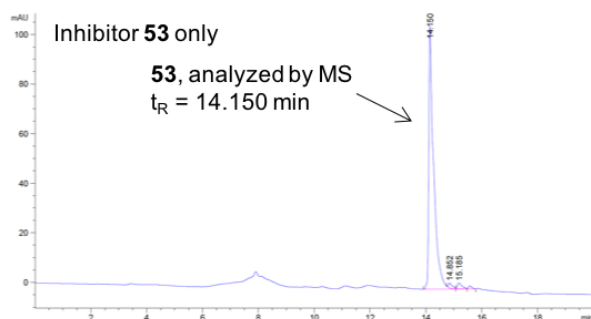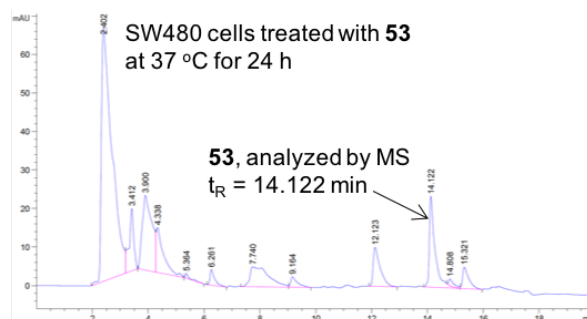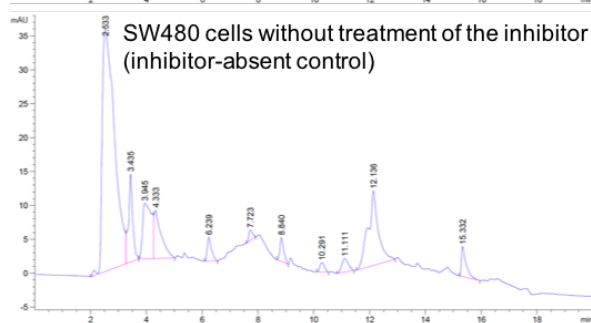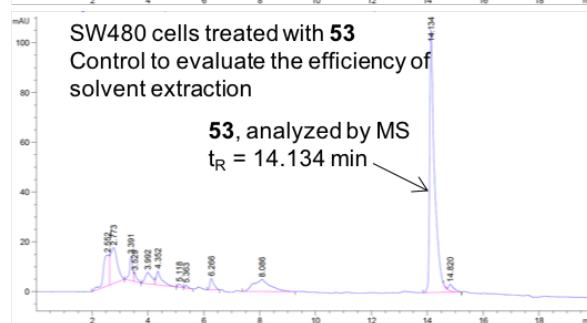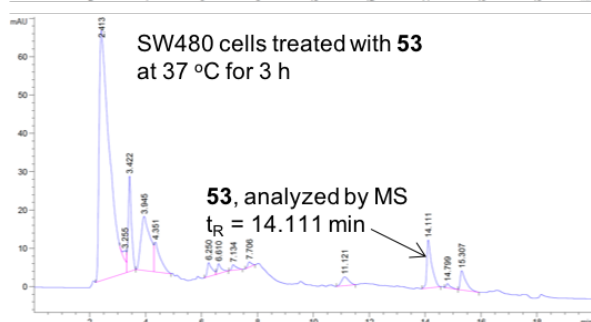

**Supplementary Figure S7.** HPLC/DAD Chromatograms of **53** Under Various Conditions to Determine the Intracellular Concentrations.

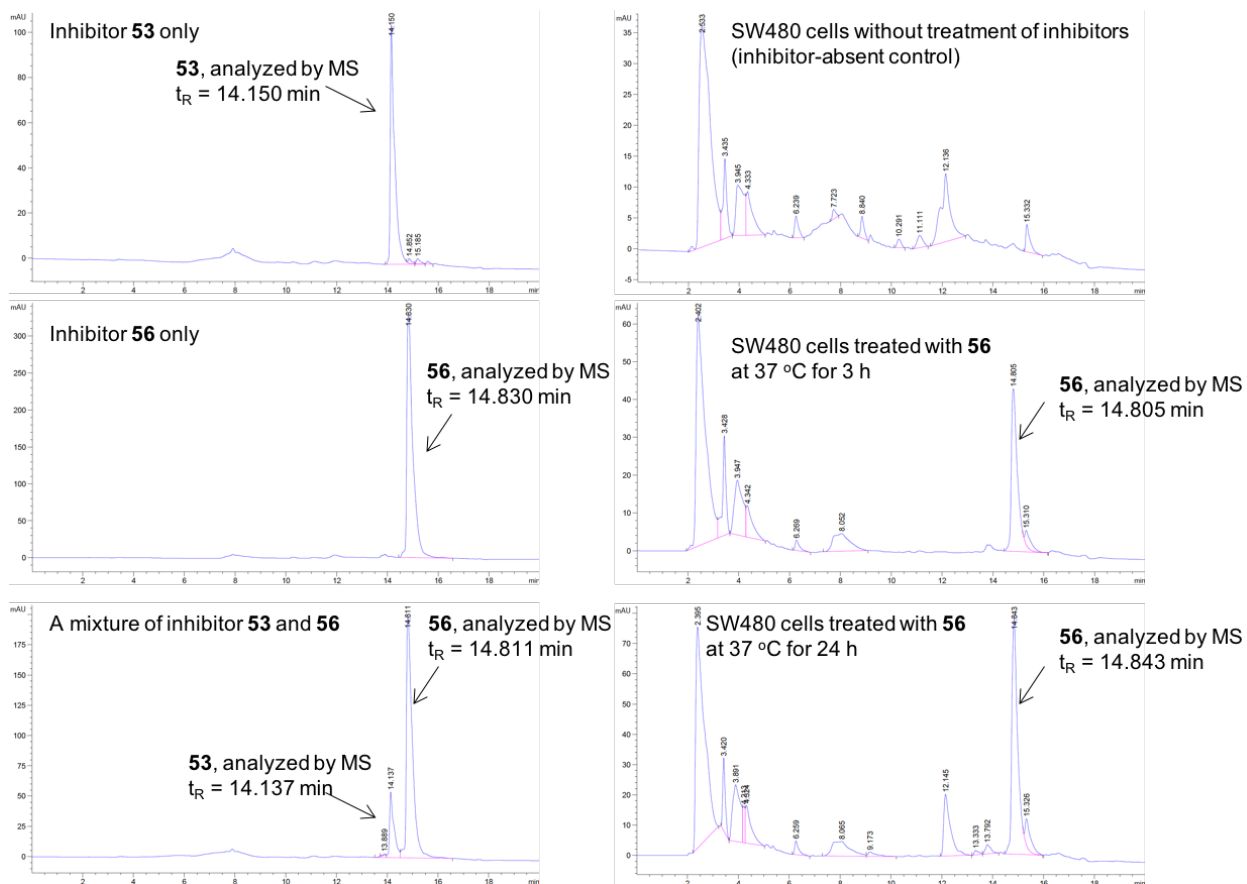

**Supplementary Figure S8.** HPLC/DAD Chromatograms of **56** Under Various Conditions to Determine the Intracellular Concentrations.



## Supplementary Scheme S1. Synthesis of Final Compounds 2–19.

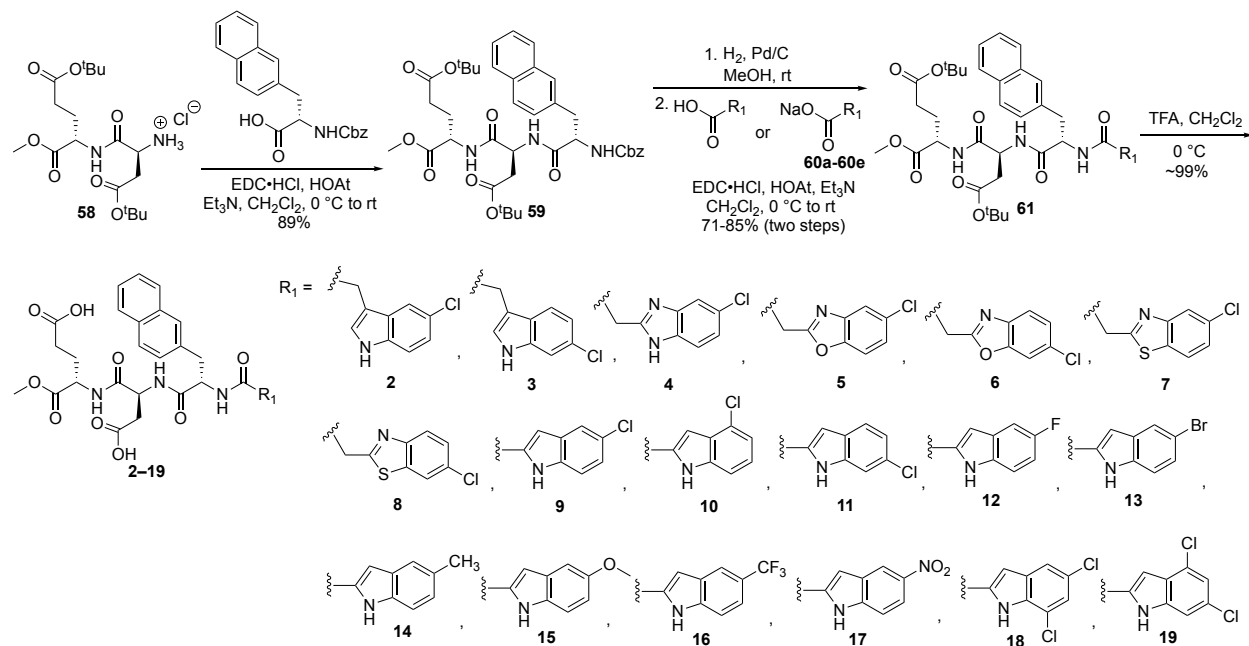

## Supplementary Scheme S2. Synthesis of Final Compounds 22–26.

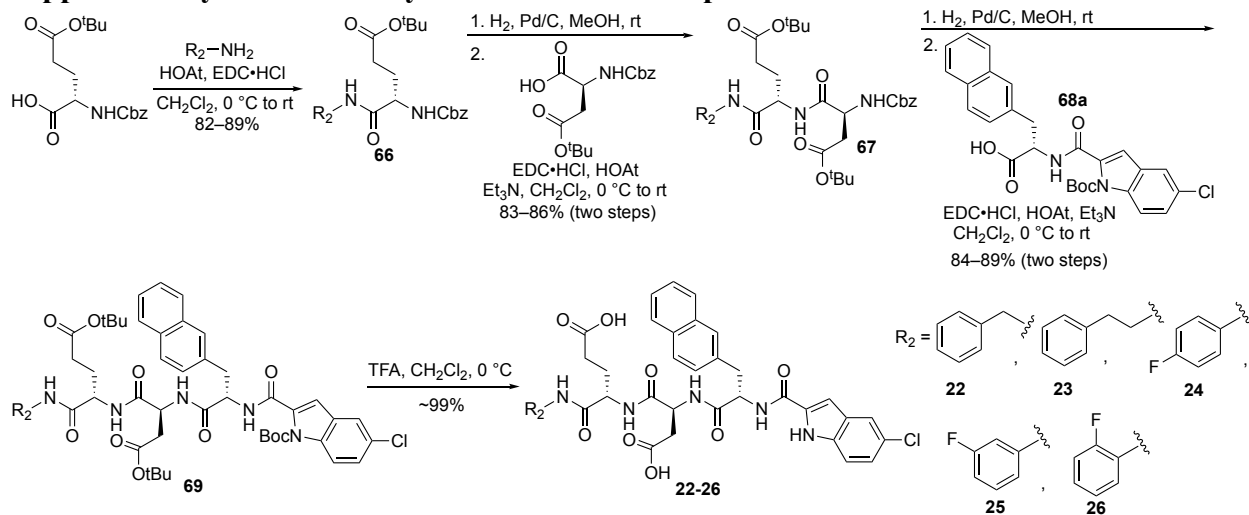

### Supplementary Scheme S3. Synthesis of Final Compounds 27–29.

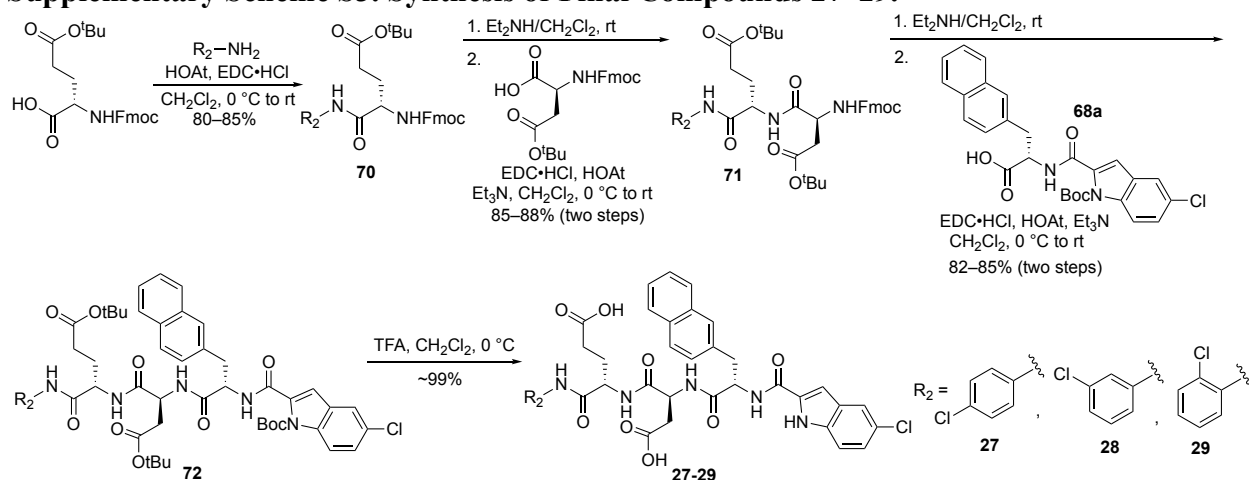

### Supplementary Scheme S4. Synthesis of Final Compound 39.

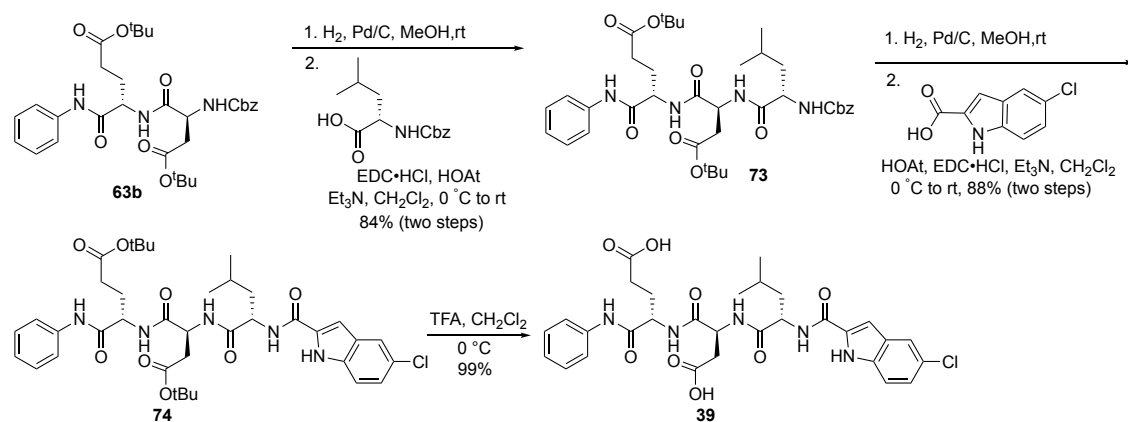

### Supplementary Scheme S5. Synthesis of Final Compounds 40–45.

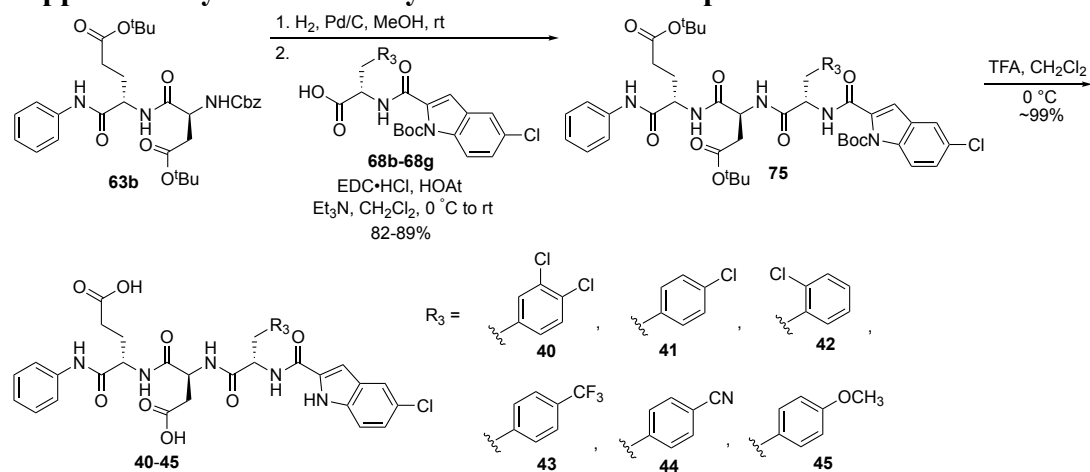

### Supplementary Scheme S6. Synthesis of Final Compound 46.

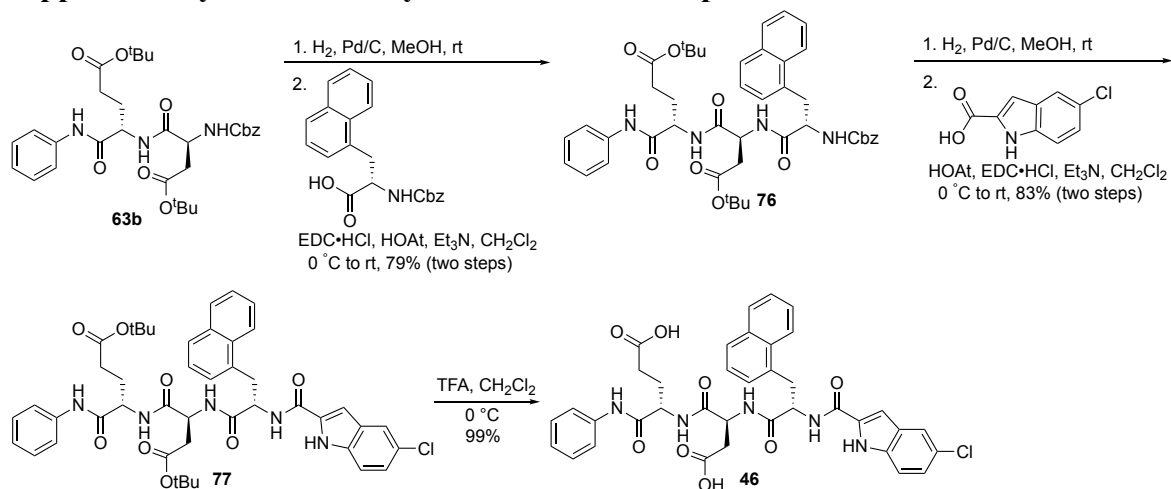

### Supplementary Scheme S7. Synthesis of Final Compounds 47–49.

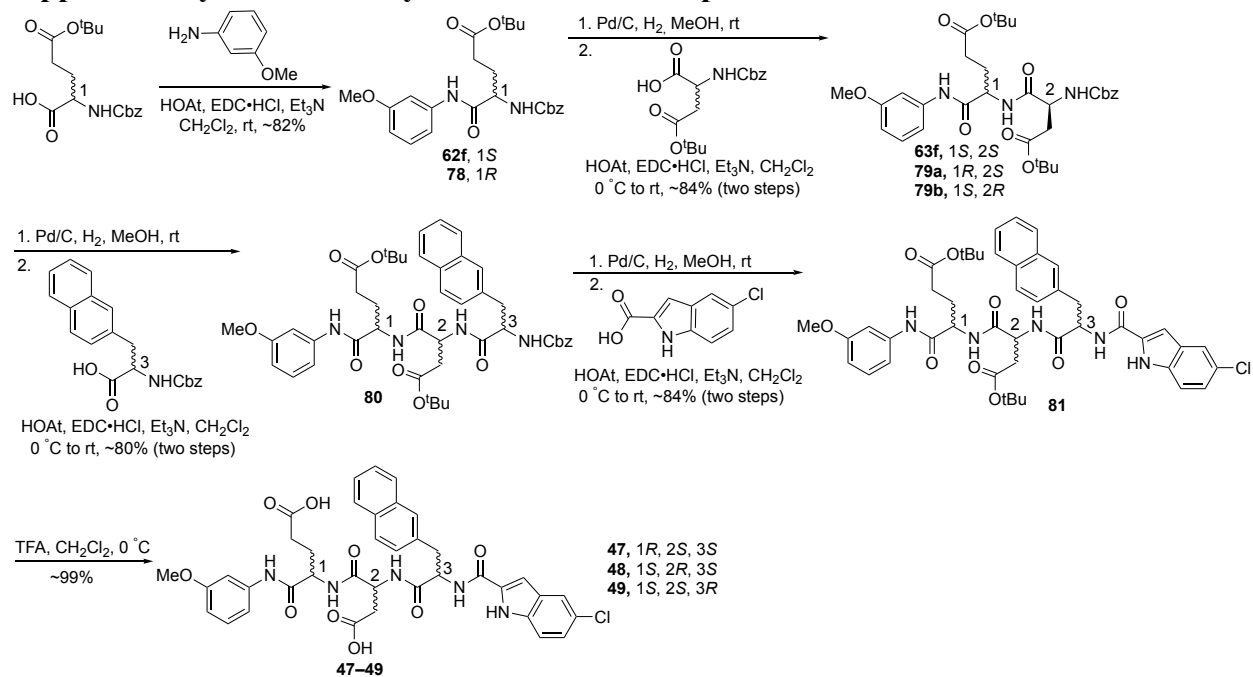

### Supplementary Scheme S8. Synthesis of Final Compound 50.

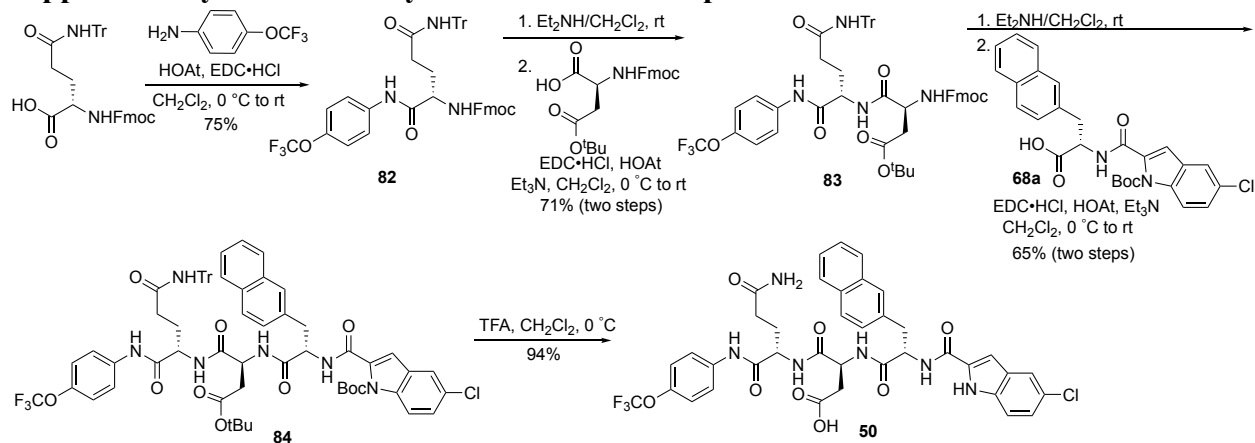

### Supplementary Scheme S9. Synthesis of Final Compound 51.

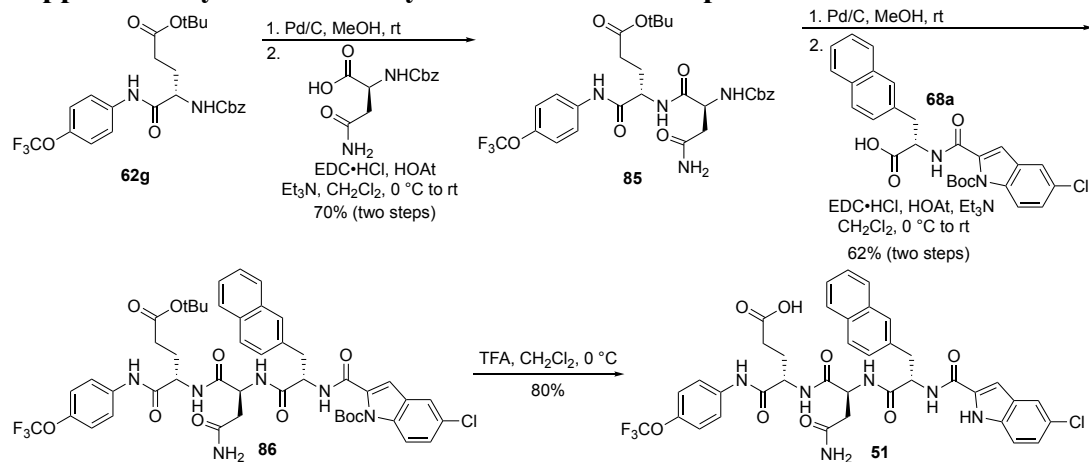

### Supplementary Scheme S10. Synthesis of Final Compound 52.

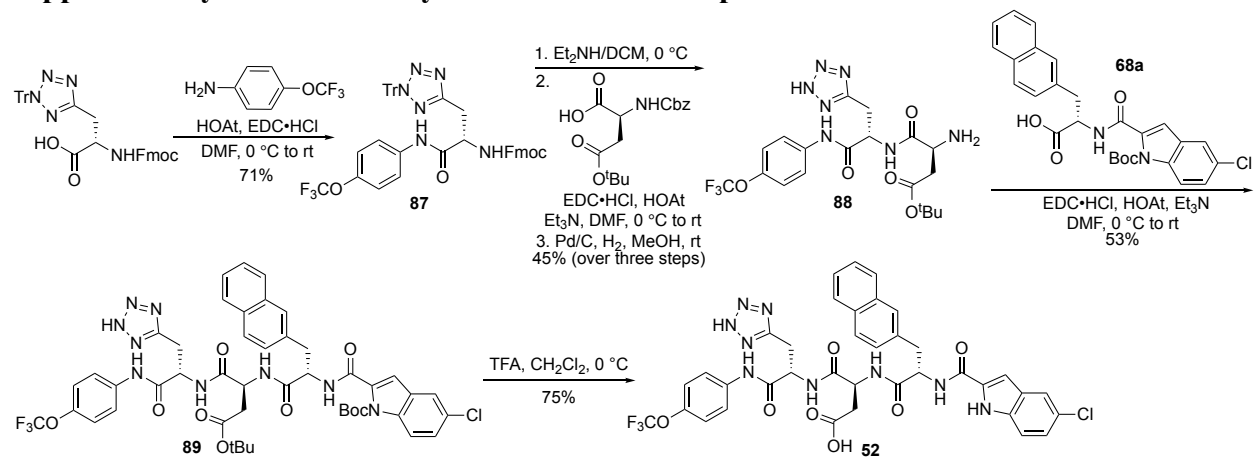

### Supplementary Scheme S11. Synthesis of Final Compound 54.

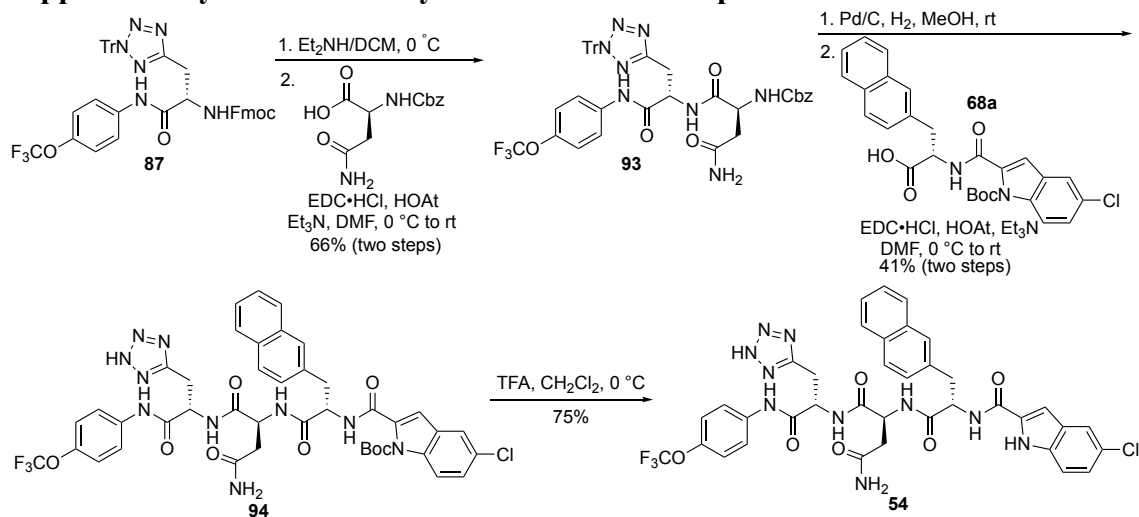

### Supplementary Scheme S12. Synthesis of Intermediates 60a–60e.

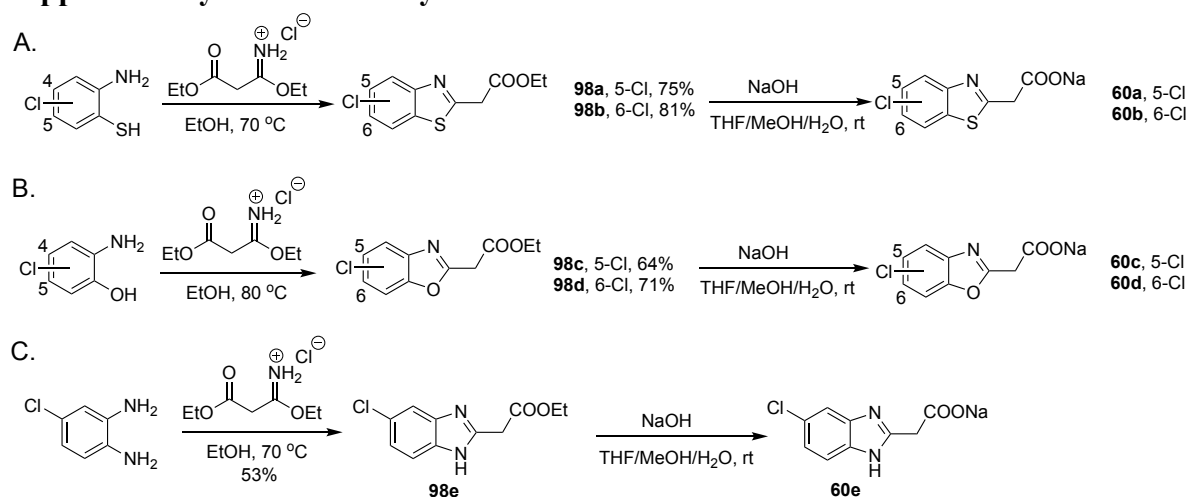

### Supplementary Scheme S13. Synthesis of Intermediates 68a–68h.

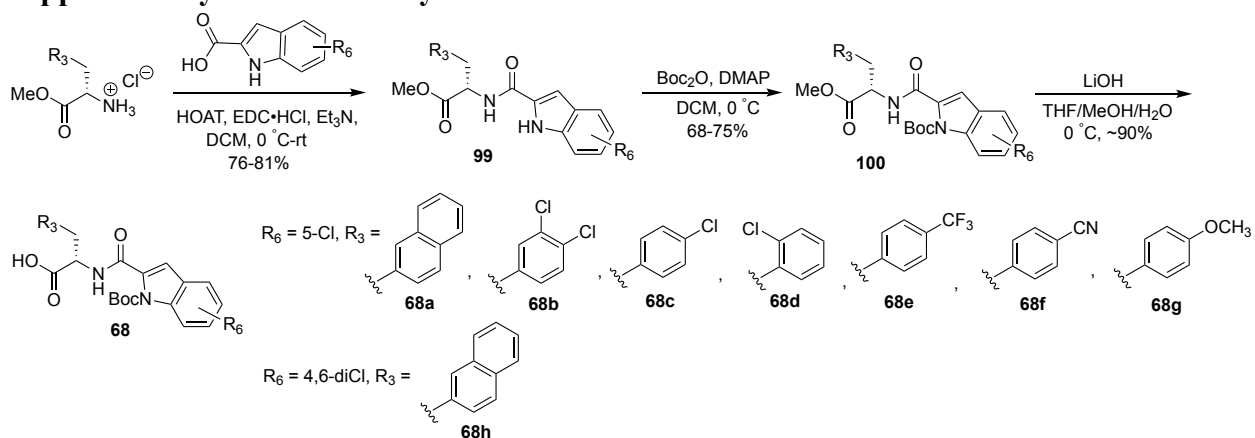

### Supplementary Scheme S14. Synthesis of (Et)-15.

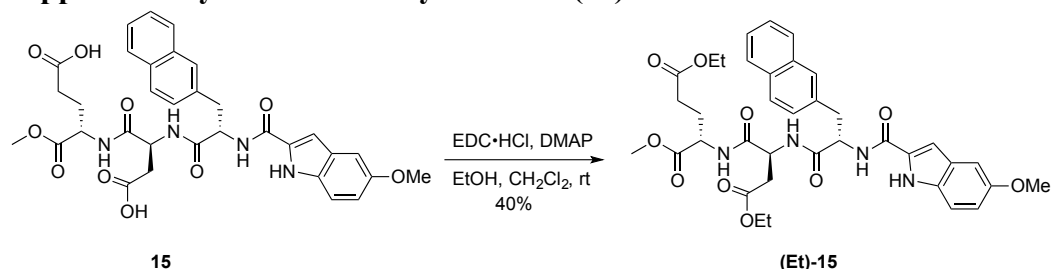

### Supplemental Procedures.

The starting material **58** was prepared according to our previous paper.<sup>4</sup>

**5-(tert-Butyl) 1-methyl ((S)-2-((S)-2-(((benzyloxy)carbonyl)amino)-3-(naphthalen-2-yl)propanamido)-4-(tert-butoxy)-4-oxobutanoyl)-L-glutamate (**59**).** Yield, 89%. <sup>1</sup>H NMR (500 MHz, CDCl<sub>3</sub>) δ 7.85 – 7.63 (m, 3H), 7.60 – 7.54 (m, 1H), 7.46 – 7.33 (m, 2H), 7.29 – 7.13 (m, 8H), 7.09 (d, *J* = 8.1 Hz, 1H), 4.99 (d, *J* = 2.8 Hz, 2H), 4.72 – 4.61 (m, 1H), 4.47 (q, *J* = 6.7 Hz, 1H), 4.39 (td, *J* = 8.2, 5.1 Hz, 1H), 3.64 (s, 3H), 3.26 (dd, *J* = 14.2, 5.8 Hz, 1H), 3.17 (dd, *J* = 14.2, 7.6 Hz, 1H), 2.88 (d, *J* = 17.3 Hz, 1H), 2.38 (dd, *J* = 17.2, 6.4 Hz, 1H), 2.18 – 2.09 (m, 2H), 2.04 – 1.97 (m, 1H), 1.76 (dtd, *J* = 14.6, 8.7, 6.1 Hz, 1H), 1.33 (s, 9H), 1.31 (s, 9H). <sup>13</sup>C NMR (126 MHz, CDCl<sub>3</sub>) δ 171.4, 170.7, 135.9, 133.5, 133.4, 132.6, 128.7, 128.5, 128.3, 128.1, 128.0, 127.7, 127.6, 127.0, 126.3, 125.9, 82.0, 80.6, 67.3, 56.4, 52.4, 51.9, 49.1, 38.1, 36.7, 31.3, 28.1, 28.0, 27.1. MS (ESI) *m/z* 742.3 [M + Na]<sup>+</sup>. The Cbz protecting group of compound **59** was removed by Pd/C under H<sub>2</sub> in MeOH. The resulting product was used directly in next step without further purification. <sup>1</sup>H NMR (500 MHz, CDCl<sub>3</sub>) δ 8.33 (d, *J* = 8.4 Hz, 1H), 7.91 – 7.72 (m, 3H), 7.67 (d, *J* = 1.6 Hz, 1H), 7.47 (tt, *J* = 6.8, 5.2 Hz, 2H), 7.37 (dd, *J* = 8.4, 1.8 Hz, 1H), 7.29 (d, *J* = 7.7 Hz, 1H), 4.79 (ddd, *J* = 8.5, 6.6, 4.6 Hz, 1H), 4.51 (td, *J* = 7.9, 5.1 Hz, 1H), 3.95 – 3.77 (m, 1H), 3.71 (s, 3H), 3.42 (dd, *J* = 13.7, 4.0 Hz, 1H), 2.93 (dd, *J* = 13.7, 9.2 Hz, 1H), 2.86 (dd, *J* = 17.0, 4.6 Hz, 1H), 2.55 (dd, *J* = 17.0, 6.6 Hz, 1H), 2.27 (td, *J* = 8.1, 6.7 Hz, 2H), 2.19 – 2.03 (m, 1H), 1.98 – 1.80 (m, 1H), 1.42 (s, 9H), 1.42 (s, 9H). MS (ESI) *m/z* = 586.3 [M + H]<sup>+</sup>, 608.3 [M + Na]<sup>+</sup>.

**5-(tert-Butyl) 1-methyl ((S)-4-(tert-butoxy)-2-((S)-2-(2-(5-chloro-1H-indol-3-yl)acetamido)-3-(naphthalen-2-yl)propanamido)-4-oxobutanoyl)-L-glutamate (**61a**).** Yield, 84%. <sup>1</sup>H NMR (500 MHz, CDCl<sub>3</sub>) δ 8.38 (d, *J* = 2.5 Hz, 1H), 7.75 (dt, *J* = 7.0, 3.5 Hz, 1H), 7.62 – 7.50 (m, 2H), 7.48 – 7.41 (m, 2H), 7.41 – 7.35 (m, 2H), 7.32 (d, *J* = 8.2 Hz, 1H), 7.21 – 7.13 (m, 2H), 7.08 (dd, *J* = 8.6, 2.0 Hz, 1H), 6.97 (dd, *J* = 8.4, 1.8 Hz, 1H), 6.77 (d, *J* = 2.4 Hz, 1H), 6.13 (d, *J* = 6.0 Hz, 1H), 4.73 (ddd, *J* = 8.5, 6.0, 3.9 Hz, 1H), 4.64 (dt, *J* = 7.8, 5.8 Hz, 1H), 4.52 (td, *J* = 8.5, 5.0 Hz, 1H), 3.69 (s, 3H), 3.68 – 3.47 (m, 2H), 3.17 (dd, *J* = 14.1, 5.6 Hz, 1H), 3.08 (dd, *J* = 14.1, 7.8 Hz, 1H), 2.97 (dd, *J* = 17.3, 3.9 Hz, 1H), 2.45 (dd, *J* = 17.3, 6.0 Hz, 1H), 2.33 – 2.21 (m, 2H), 2.12 (dtd, *J* = 13.9, 7.8, 5.0 Hz, 1H), 1.93 (dtd, *J* = 14.0, 8.4, 6.8 Hz, 1H), 1.40 (s, 9H), 1.37 (s, 9H). <sup>13</sup>C NMR (126 MHz, CDCl<sub>3</sub>) δ 172.4, 172.1, 171.7, 171.7, 170.4, 170.2, 134.5, 133.2, 133.2, 132.3, 128.5, 127.8, 127.7, 127.6, 127.5, 126.6, 126.2, 125.8, 125.8, 125.3, 122.9, 117.7, 112.6, 107.6, 82.0, 80.6, 54.9, 52.4, 51.9, 49.2, 37.1, 36.5, 32.9, 31.4, 28.1, 28.0, 27.2. MS (ESI) *m/z* = 799.3 [M + Na]<sup>+</sup>, 775.3 [M – H]<sup>-</sup>.

**5-(tert-Butyl) 1-methyl ((S)-4-(tert-butoxy)-2-((S)-2-(2-(6-chloro-1H-indol-3-yl)acetamido)-3-(naphthalen-2-yl)propanamido)-4-oxobutanoyl)-L-glutamate (**61b**).** Yield, 80%. <sup>1</sup>H NMR (500 MHz, Chloroform-*d*) δ 8.47 (d, *J* = 2.4 Hz, 1H), 7.85 – 7.72 (m, 1H), 7.56 (dd, *J* = 8.8, 3.9 Hz, 2H), 7.51 – 7.46 (m, 2H), 7.38 (dd, *J* = 8.4, 6.2 Hz, 2H), 7.31 (d, *J* = 1.8 Hz, 1H), 7.23 (d, *J* = 8.5 Hz, 1H), 7.18 (d, *J* = 1.6 Hz, 1H), 6.94 (dd, *J* = 8.4, 1.8 Hz, 1H), 6.88 (dd, *J* = 8.5, 1.8 Hz, 1H),

6.80 (d,  $J = 2.5$  Hz, 1H), 6.12 (d,  $J = 5.8$  Hz, 1H), 4.78 (ddd,  $J = 8.7, 5.8, 3.9$  Hz, 1H), 4.63 (dt,  $J = 8.1, 5.5$  Hz, 1H), 4.56 (td,  $J = 8.5, 4.8$  Hz, 1H), 3.72 (s, 3H), 3.71 – 3.55 (m, 2H), 3.19 (dd,  $J = 14.1, 5.4$  Hz, 1H), 3.10 – 2.95 (m, 2H), 2.44 (dd,  $J = 17.3, 5.8$  Hz, 1H), 2.31 (t,  $J = 7.8$  Hz, 2H), 2.18 – 2.10 (m, 1H), 1.98 (ddt,  $J = 14.2, 8.9, 7.5$  Hz, 1H), 1.41 (s, 9H), 1.40 (s, 9H).  $^{13}\text{C}$  NMR (126 MHz, Chloroform-*d*)  $\delta$  172.7, 172.1, 171.8, 170.4, 170.2, 136.5, 133.2, 133.0, 132.3, 128.5, 128.4, 127.7, 127.6, 127.5, 126.5, 126.2, 125.9, 125.3, 124.7, 120.8, 119.1, 111.5, 107.9, 82.0, 80.6, 55.0, 52.4, 51.9, 49.1, 37.0, 36.4, 32.8, 31.5, 28.1, 28.0, 27.2. MS (ESI)  $m/z = 799.3$   $[\text{M} + \text{Na}]^+$ , 775.2  $[\text{M} - \text{H}]^-$ .

**5-(*tert*-Butyl) 1-methyl ((*S*)-4-(*tert*-butoxy)-2-((*S*)-2-(2-(5-chloro-1*H*-benzo[*d*]imidazol-2-yl)acetamido)-3-(naphthalen-2-yl)propanamido)-4-oxobutanoyl)-*L*-glutamate (61c).** Yield, 71%.  $^1\text{H}$  NMR (500 MHz, Chloroform-*d*)  $\delta$  8.39 (d,  $J = 6.4$  Hz, 1H), 7.71 – 7.60 (m, 3H), 7.58 – 7.53 (m, 1H), 7.50 (d,  $J = 8.8$  Hz, 2H), 7.43 (s, 1H), 7.35 (dtd,  $J = 6.9, 5.3, 4.7, 3.3$  Hz, 3H), 7.19 (dd,  $J = 8.3, 1.8$  Hz, 1H), 7.15 (dd,  $J = 8.6, 2.0$  Hz, 1H), 4.92 – 4.70 (m, 2H), 4.46 (td,  $J = 8.4, 5.0$  Hz, 1H), 3.89 (d,  $J = 16.3$  Hz, 1H), 3.76 (d,  $J = 16.3$  Hz, 1H), 3.68 (s, 3H), 3.23 (d,  $J = 6.4$  Hz, 2H), 2.79 (dd,  $J = 17.1, 4.6$  Hz, 1H), 2.35 (dd,  $J = 17.1, 6.1$  Hz, 1H), 2.24 (dt,  $J = 9.3, 6.3$  Hz, 2H), 2.10 (tdd,  $J = 11.6, 5.2, 3.5$  Hz, 1H), 2.00 – 1.84 (m, 1H), 1.43 (s, 9H), 1.10 (s, 9H).  $^{13}\text{C}$  NMR (126 MHz, Chloroform-*d*)  $\delta$  173.1, 171.6, 170.9, 170.5, 170.3, 168.5, 149.3, 133.3, 132.3, 128.2, 128.1, 128.0, 127.6, 127.5, 127.1, 126.2, 125.8, 123.0, 82.0, 81.3, 55.7, 53.9, 52.4, 51.9, 48.9, 37.6, 36.7, 36.3, 31.9, 28.0, 27.6. MS (ESI)  $m/z = 778.3$   $[\text{M} + \text{H}]^+$ , 800.3  $[\text{M} + \text{Na}]^+$ , 776.2  $[\text{M} - \text{H}]^-$ .

**5-(*tert*-Butyl) 1-methyl ((*S*)-4-(*tert*-butoxy)-2-((*S*)-2-(2-(5-chlorobenzo[*d*]oxazol-2-yl)acetamido)-3-(naphthalen-2-yl)propanamido)-4-oxobutanoyl)-*L*-glutamate (61d).** Yield, 74%.  $^1\text{H}$  NMR (500 MHz, Chloroform-*d*)  $\delta$  8.15 (d,  $J = 6.6$  Hz, 1H), 7.82 – 7.72 (m, 1H), 7.71 – 7.62 (m, 3H), 7.51 – 7.41 (m, 3H), 7.33 (dd,  $J = 8.4, 1.7$  Hz, 1H), 7.30 – 7.26 (m, 2H), 7.24 (dt,  $J = 8.5, 1.6$  Hz, 2H), 4.92 – 4.74 (m, 2H), 4.49 (td,  $J = 8.4, 5.0$  Hz, 1H), 3.95 (d,  $J = 18.1$  Hz, 1H), 3.86 (d,  $J = 18.0$  Hz, 1H), 3.69 (s, 3H), 3.35 (h,  $J = 7.8, 7.4$  Hz, 2H), 2.92 (dd,  $J = 17.2, 4.4$  Hz, 1H), 2.53 (dd,  $J = 17.2, 6.3$  Hz, 1H), 2.24 (ddd,  $J = 8.5, 6.6, 5.4$  Hz, 2H), 2.09 (dddd,  $J = 13.8, 8.7, 7.1, 5.0$  Hz, 1H), 1.96 – 1.81 (m, 1H), 1.41 (s, 9H), 1.30 (s, 9H).  $^{13}\text{C}$  NMR (126 MHz, Chloroform-*d*)  $\delta$  171.9, 171.7, 171.3, 170.4, 170.1, 165.7, 162.1, 148.9, 141.4, 133.4, 133.4, 132.5, 130.1, 128.4, 128.2, 127.6, 127.5, 127.0, 126.3, 125.9, 125.6, 119.7, 111.3, 81.8, 80.6, 55.3, 52.4, 51.8, 49.3, 37.5, 36.7, 35.7, 31.3, 28.1, 27.8, 27.1. MS (ESI)  $m/z = 801.3$   $[\text{M} + \text{Na}]^+$ , 777.3  $[\text{M} - \text{H}]^-$ .

**5-(*tert*-Butyl) 1-methyl ((*S*)-4-(*tert*-butoxy)-2-((*S*)-2-(2-(6-chlorobenzo[*d*]oxazol-2-yl)acetamido)-3-(naphthalen-2-yl)propanamido)-4-oxobutanoyl)-*L*-glutamate (61e).** Yield, 72%.  $^1\text{H}$  NMR (500 MHz, Chloroform-*d*)  $\delta$  8.05 (d,  $J = 6.5$  Hz, 1H), 7.78 – 7.74 (m, 1H), 7.72 – 7.61 (m, 3H), 7.50 – 7.38 (m, 4H), 7.36 – 7.30 (m, 2H), 7.29 – 7.25 (m, 1H), 7.20 (d,  $J = 8.1$  Hz, 1H), 4.98 – 4.72 (m, 2H), 4.50 (td,  $J = 8.4, 5.0$  Hz, 1H), 4.06 – 3.82 (m, 2H), 3.72 (s, 3H), 3.37 (qd,  $J = 14.2, 6.7$  Hz, 2H), 2.94 (dd,  $J = 17.1, 4.3$  Hz, 1H), 2.52 (dd,  $J = 17.2, 6.3$  Hz, 1H), 2.25 (dt,  $J = 8.6, 6.4$  Hz, 2H), 2.14 – 2.07 (m, 1H), 1.98 – 1.81 (m, 1H), 1.43 (s, 9H), 1.32 (s, 9H).  $^{13}\text{C}$  NMR (126 MHz, Chloroform-*d*)  $\delta$  171.9, 171.7, 171.3, 170.3, 170.0, 165.6, 161.3, 150.6, 139.1, 133.4 (d,  $J = 2.7$  Hz), 132.5, 131.0, 128.5, 128.1, 127.7, 127.5, 127.0, 126.3, 125.8, 125.3, 120.2, 111.2, 81.8, 80.6, 55.4, 52.4, 51.8, 49.2, 37.5, 36.7, 35.7, 31.3, 28.1, 27.9, 27.1. MS (ESI)  $m/z = 801.3$   $[\text{M} + \text{Na}]^+$ , 777.3  $[\text{M} - \text{H}]^-$ .

**5-(*tert*-Butyl) 1-methyl ((*S*)-4-(*tert*-butoxy)-2-((*S*)-2-(2-(5-chlorobenzo[*d*]thiazol-2-yl)acetamido)-3-(naphthalen-2-yl)propanamido)-4-oxobutanoyl)-*L*-glutamate (61f).** Yield, 75%.  $^1\text{H}$  NMR (500 MHz, Chloroform-*d*)  $\delta$  7.81 (d,  $J = 6.4$  Hz, 1H), 7.72 – 7.64 (m, 1H), 7.63 – 7.55 (m, 3H), 7.54 – 7.48 (m, 2H), 7.38 – 7.30 (m, 2H), 7.26 (dd,  $J = 8.6, 2.0$  Hz, 2H), 7.22 – 7.18 (m, 1H), 7.14 (d,  $J = 8.1$  Hz, 1H), 4.82 – 4.61 (m, 2H), 4.42 (td,  $J = 8.4, 5.0$  Hz, 1H), 4.02 (d,  $J =$

17.2 Hz, 1H), 3.93 (d,  $J = 17.2$  Hz, 1H), 3.64 (s, 3H), 3.39 – 3.18 (m, 2H), 2.87 (dd,  $J = 17.3$ , 4.0 Hz, 1H), 2.38 (dd,  $J = 17.3$ , 6.2 Hz, 1H), 2.26 – 2.12 (m, 2H), 2.03 (tdd,  $J = 12.0$ , 5.2, 3.6 Hz, 1H), 1.93 – 1.76 (m, 1H), 1.35 (s, 9H), 1.22 (s, 9H).  $^{13}\text{C}$  NMR (126 MHz, Chloroform- $d$ )  $\delta$  172.0, 171.7, 171.4, 170.2, 170.0, 167.2, 166.0, 153.1, 133.3, 133.1, 132.5, 132.4, 128.5, 127.9, 127.6, 127.4, 126.9, 126.3, 126.0, 125.9, 122.5, 122.2, 81.8, 80.6, 55.4, 52.4, 51.9, 49.2, 40.5, 37.4, 36.6, 31.4, 28.1, 27.9, 27.2. MS (ESI)  $m/z = 817.2$   $[\text{M} + \text{Na}]^+$ , 793.3  $[\text{M} - \text{H}]^-$ .

**5-(*tert*-Butyl) 1-methyl ((*S*)-4-(*tert*-butoxy)-2-((*S*)-2-(2-(6-chlorobenzo[*d*]thiazol-2-yl)acetamido)-3-(naphthalen-2-yl)propanamido)-4-oxobutanoyl)-*L*-glutamate (61g).** Yield, 72%.  $^1\text{H}$  NMR (500 MHz, Chloroform- $d$ )  $\delta$  7.75 (d,  $J = 6.3$  Hz, 1H), 7.73 – 7.67 (m, 2H), 7.61 (d,  $J = 8.4$  Hz, 1H), 7.58 – 7.51 (m, 3H), 7.49 – 7.38 (m, 2H), 7.36 – 7.30 (m, 2H), 7.29 – 7.23 (m, 1H), 7.20 (d,  $J = 8.1$  Hz, 1H), 4.77 (ddt,  $J = 8.3$ , 6.1, 4.9 Hz, 2H), 4.49 (td,  $J = 8.4$ , 5.0 Hz, 1H), 4.07 (d,  $J = 17.2$  Hz, 1H), 3.97 (d,  $J = 17.2$  Hz, 1H), 3.72 (s, 3H), 3.41 – 3.18 (m, 2H), 2.95 (dd,  $J = 17.3$ , 4.0 Hz, 1H), 2.44 (dd,  $J = 17.3$ , 6.2 Hz, 1H), 2.25 (dt,  $J = 8.6$ , 6.3 Hz, 2H), 2.11 (dddd,  $J = 13.9$ , 8.9, 7.1, 4.9 Hz, 1H), 2.02 – 1.80 (m, 1H), 1.42 (s, 9H), 1.30 (s, 9H).  $^{13}\text{C}$  NMR (126 MHz, Chloroform- $d$ )  $\delta$  172.0, 171.7, 171.5, 170.2, 170.0, 167.3, 164.4, 151.1, 136.1, 133.3, 133.3, 132.4, 131.4, 128.4, 127.9, 127.6, 127.4, 127.1, 126.8, 126.3, 125.8, 123.4, 121.2, 81.9, 80.6, 55.3, 52.4, 51.9, 49.1, 40.5, 37.4, 36.6, 31.4, 28.1, 27.9, 27.2. MS (ESI)  $m/z = 817.2$   $[\text{M} + \text{Na}]^+$ , 793.3  $[\text{M} - \text{H}]^-$ .

**5-(*tert*-Butyl) 1-methyl ((*S*)-4-(*tert*-butoxy)-2-((*S*)-2-(5-chloro-1*H*-indole-2-carboxamido)-3-(naphthalen-2-yl)propanamido)-4-oxobutanoyl)-*L*-glutamate (61h).** Yield, 85%.  $^1\text{H}$  NMR (500 MHz,  $\text{CDCl}_3$ )  $\delta$  10.42 (s, 1H), 8.51 (s, 1H), 7.95 (s, 1H), 7.70 – 7.30 (m, 6H), 7.27 – 6.92 (m, 5H), 6.86 (s, 1H), 5.28 (d,  $J = 11.3$  Hz, 1H), 5.05 (d,  $J = 9.9$  Hz, 1H), 4.39 (q,  $J = 6.8$  Hz, 1H), 3.74 (s, 3H), 3.31 – 3.08 (m, 2H), 2.88 (t,  $J = 25.0$  Hz, 2H), 2.48 – 2.22 (m, 2H), 2.04 (dp,  $J = 34.9$ , 7.5 Hz, 2H), 1.45 (d,  $J = 2.6$  Hz, 9H), 1.39 (s, 9H).  $^{13}\text{C}$  NMR (126 MHz,  $\text{CDCl}_3$ )  $\delta$  172.1, 171.6, 171.3, 170.3, 161.5, 135.2, 134.0, 133.3, 132.2, 131.5, 128.3, 128.0, 127.8, 127.2, 125.8, 125.4, 124.2, 120.9, 113.5, 101.9, 82.1, 81.0, 55.1, 52.4, 52.2, 48.7, 38.7, 36.2, 31.4, 28.1, 27.9, 27.1. MS (ESI)  $m/z = 785.3$   $[\text{M} + \text{Na}]^+$ .

**5-(*tert*-Butyl) 1-methyl ((*S*)-4-(*tert*-butoxy)-2-((*S*)-2-(4-chloro-1*H*-indole-2-carboxamido)-3-(naphthalen-2-yl)propanamido)-4-oxobutanoyl)-*L*-glutamate (61i).** Yield, 82%.  $^1\text{H}$  NMR (500 MHz, Chloroform- $d$ )  $\delta$  10.79 (s, 1H), 8.35 (d,  $J = 8.5$  Hz, 1H), 7.57 – 7.41 (m, 6H), 7.24 – 7.07 (m, 6H), 7.05 (d,  $J = 2.2$  Hz, 1H), 5.48 (q,  $J = 7.4$  Hz, 1H), 4.97 (td,  $J = 8.4$ , 4.2 Hz, 1H), 4.36 (td,  $J = 7.8$ , 5.6 Hz, 1H), 3.67 (s, 3H), 3.42 – 3.17 (m, 2H), 2.83 (dd,  $J = 17.4$ , 4.2 Hz, 1H), 2.62 (dd,  $J = 17.3$ , 8.4 Hz, 1H), 2.41 – 2.25 (m, 2H), 2.11 (ddt,  $J = 14.7$ , 9.0, 6.0 Hz, 1H), 2.04 – 1.96 (m, 1H), 1.46 (s, 9H), 1.31 (s, 9H).  $^{13}\text{C}$  NMR (126 MHz, Chloroform- $d$ )  $\delta$  172.2, 171.6, 171.1, 170.9, 170.8, 161.3, 137.5, 133.8, 133.3, 132.3, 130.5, 128.1, 128.0, 127.4, 127.3, 126.9, 126.5, 125.9, 125.4, 124.5, 119.8, 111.2, 101.3, 81.8, 81.1, 54.6, 52.4, 52.2, 48.9, 39.3, 38.5, 31.5, 28.1, 27.9, 26.9. MS (ESI)  $m/z = 763.4$   $[\text{M} + \text{H}]^+$ , 785.3  $[\text{M} + \text{Na}]^+$ .

**5-(*tert*-Butyl) 1-methyl ((*S*)-4-(*tert*-butoxy)-2-((*S*)-2-(6-chloro-1*H*-indole-2-carboxamido)-3-(naphthalen-2-yl)propanamido)-4-oxobutanoyl)-*L*-glutamate (61j).** Yield, 79%.  $^1\text{H}$  NMR (500 MHz, Chloroform- $d$ )  $\delta$  10.73 (s, 1H), 8.33 (d,  $J = 8.5$  Hz, 1H), 7.67 – 7.41 (m, 6H), 7.35 (d,  $J = 1.8$  Hz, 1H), 7.29 – 7.16 (m, 4H), 7.08 (dd,  $J = 8.6$ , 1.8 Hz, 1H), 6.91 (d,  $J = 2.1$  Hz, 1H), 5.48 (q,  $J = 7.3$  Hz, 1H), 4.94 (td,  $J = 8.3$ , 4.4 Hz, 1H), 4.34 – 4.25 (m, 1H), 3.71 (s, 3H), 3.45 – 3.21 (m, 2H), 2.79 (dd,  $J = 17.3$ , 4.4 Hz, 1H), 2.61 (dd,  $J = 17.3$ , 8.3 Hz, 1H), 2.43 – 2.24 (m, 2H), 2.11 (ddt,  $J = 14.8$ , 9.0, 6.3 Hz, 1H), 2.04 – 1.95 (m, 1H), 1.46 (s, 9H), 1.31 (s, 9H).  $^{13}\text{C}$  NMR (126 MHz, Chloroform- $d$ )  $\delta$  172.2, 171.6, 171.0, 170.8, 161.4, 137.3, 133.7, 133.3, 132.3, 130.7, 130.0,



128.1, 127.9, 127.4, 127.3, 127.2, 125.9, 125.9, 125.5, 122.8, 121.2, 112.3, 102.9, 81.8, 81.1, 54.4, 52.4, 52.2, 48.9, 39.3, 38.4, 31.5, 28.1, 27.8, 26.8. MS (ESI)  $m/z = 785.3 [M + Na]^+$ .

**5-(*tert*-Butyl) 1-methyl ((*S*)-4-(*tert*-butoxy)-2-((*S*)-2-(5-fluoro-1*H*-indole-2-carboxamido)-3-(naphthalen-2-yl)propanamido)-4-oxobutanoyl)-*L*-glutamate (61k).** Yield, 74%.  $^1\text{H}$  NMR (500 MHz, Chloroform-*d*)  $\delta$  10.34 (s, 1H), 8.80 (s, 1H), 8.44 (s, 1H), 7.64 (d,  $J = 7.5$  Hz, 1H), 7.52 – 7.28 (m, 5H), 7.16 (dd,  $J = 6.3, 3.2$  Hz, 2H), 7.08 – 6.88 (m, 4H), 5.40 – 5.32 (m, 1H), 5.16 (d,  $J = 7.6$  Hz, 1H), 4.41 (q,  $J = 7.0$  Hz, 1H), 3.77 (s, 3H), 3.31 – 2.85 (m, 4H), 2.43 – 2.24 (m, 2H), 2.12 – 2.07 (m, 1H), 2.05 – 1.90 (m, 1H), 1.46 (s, 9H), 1.44 (s, 9H).  $^{13}\text{C}$  NMR (126 MHz, Chloroform-*d*)  $\delta$  172.3, 172.0, 171.6, 171.3, 170.3, 161.6, 158.8, 157.0, 134.4, 133.5, 133.3, 132.2, 132.0, 125.7, 125.2, 113.3 (d,  $J = 9.6$  Hz), 112.5, 112.3, 105.9, 105.7, 102.4, 82.1, 80.9, 55.3, 52.4, 52.2, 48.7, 39.6, 38.8, 31.5, 28.1, 28.0, 27.3. MS (ESI)  $m/z = 769.3 [M + Na]^+$ .

**5-(*tert*-Butyl) 1-methyl ((*S*)-2-((*S*)-2-(5-bromo-1*H*-indole-2-carboxamido)-3-(naphthalen-2-yl)propanamido)-4-(*tert*-butoxy)-4-oxobutanoyl)-*L*-glutamate (61l).** Yield, 78%.  $^1\text{H}$  NMR (500 MHz, Chloroform-*d*)  $\delta$  10.43 (s, 1H), 8.51 (s, 1H), 7.96 (s, 1H), 7.70 (d,  $J = 2.0$  Hz, 1H), 7.49 (d,  $J = 7.3$  Hz, 1H), 7.41 – 7.25 (m, 4H), 7.20 (d,  $J = 1.9$  Hz, 1H), 7.13 – 7.06 (m, 2H), 6.99 (t,  $J = 9.6$  Hz, 2H), 6.89 – 6.72 (m, 1H), 5.42 – 5.24 (m, 1H), 4.97 (q,  $J = 7.3$  Hz, 1H), 4.29 (q,  $J = 6.9$  Hz, 1H), 3.65 (s, 3H), 3.21 – 3.00 (m, 2H), 2.77 (td,  $J = 24.2, 21.5, 9.8$  Hz, 2H), 2.30 – 2.14 (m, 2H), 1.97 (d,  $J = 9.7$  Hz, 1H), 1.92 – 1.87 (m, 1H), 1.37 (s, 9H), 1.29 (s, 9H).  $^{13}\text{C}$  NMR (126 MHz, Chloroform-*d*)  $\delta$  172.1, 171.8, 171.6, 171.2, 170.4, 161.4, 135.4, 134.1, 133.3, 132.2, 131.4, 129.1, 128.0, 127.8, 127.3, 127.2, 126.7, 125.8, 125.4, 124.1, 114.0, 113.1, 101.9, 82.0, 81.0, 55.0, 52.5, 52.2, 48.8, 39.1, 38.9, 31.4, 28.1, 28.0, 27.0. MS (ESI)  $m/z = 829.3 [M + Na]^+$ .

**5-(*tert*-Butyl) 1-methyl ((*S*)-4-(*tert*-butoxy)-2-((*S*)-2-(5-methyl-1*H*-indole-2-carboxamido)-3-(naphthalen-2-yl)propanamido)-4-oxobutanoyl)-*L*-glutamate (61m).** Yield, 83%.  $^1\text{H}$  NMR (500 MHz,  $\text{CDCl}_3$ )  $\delta$  10.54 – 10.31 (m, 1H), 8.25 (d,  $J = 8.5$  Hz, 1H), 7.48 (ddd,  $J = 11.3, 5.9, 2.4$  Hz, 4H), 7.38 (d,  $J = 7.7$  Hz, 1H), 7.34 – 7.28 (m, 1H), 7.24 – 7.07 (m, 5H), 7.01 (dd,  $J = 8.5, 1.6$  Hz, 1H), 6.78 (dd,  $J = 2.2, 0.9$  Hz, 1H), 5.41 (q,  $J = 7.2$  Hz, 1H), 4.85 (td,  $J = 8.1, 4.6$  Hz, 1H), 4.29 (td,  $J = 7.8, 5.7$  Hz, 1H), 3.59 (s, 3H), 3.23 (qd,  $J = 13.7, 6.9$  Hz, 2H), 2.71 (dd,  $J = 17.2, 4.6$  Hz, 1H), 2.52 (dd,  $J = 17.2, 7.9$  Hz, 1H), 2.41 – 2.31 (m, 3H), 2.27 – 2.17 (m, 2H), 2.01 (ddt,  $J = 14.8, 9.1, 6.2$  Hz, 1H), 1.87 (dtd,  $J = 9.4, 7.9, 4.6$  Hz, 1H), 1.36 (s, 9H), 1.21 (s, 9H).  $^{13}\text{C}$  NMR (126 MHz,  $\text{CDCl}_3$ )  $\delta$  172.2, 171.8, 171.1, 170.8 (d,  $J = 1.6$  Hz), 161.9, 135.5, 133.8, 133.4, 132.4, 130.0, 129.5, 128.2, 128.0, 127.8, 127.5, 127.5, 127.4, 126.3, 125.9, 125.5, 121.2, 112.2, 102.6, 81.7, 81.0, 54.3, 52.4, 52.2, 49.1, 39.3, 38.2, 31.5, 28.1, 27.9, 26.9, 21.5. MS (ESI)  $m/z = 765.3 [M + Na]^+$ .

**5-(*tert*-Butyl) 1-methyl ((*S*)-4-(*tert*-butoxy)-2-((*S*)-2-(5-methoxy-1*H*-indole-2-carboxamido)-3-(naphthalen-2-yl)propanamido)-4-oxobutanoyl)-*L*-glutamate (61n).** Yield, 80%.  $^1\text{H}$  NMR (500 MHz,  $\text{CDCl}_3$ )  $\delta$  10.57 – 10.40 (m, 1H), 8.18 (d,  $J = 8.5$  Hz, 1H), 7.63 – 7.47 (m, 4H), 7.36 (d,  $J = 7.7$  Hz, 1H), 7.28 – 7.13 (m, 4H), 7.05 (d,  $J = 7.6$  Hz, 1H), 6.94 (d,  $J = 2.4$  Hz, 1H), 6.86 (dd,  $J = 8.9, 2.4$  Hz, 1H), 6.79 – 6.71 (m, 1H), 5.38 (q,  $J = 7.2$  Hz, 1H), 4.84 (td,  $J = 8.1, 4.5$  Hz, 1H), 4.29 (td,  $J = 7.8, 5.6$  Hz, 1H), 3.76 (s, 3H), 3.59 (s, 3H), 3.24 (qd,  $J = 13.8, 6.9$  Hz, 2H), 2.73 (dd,  $J = 17.2, 4.4$  Hz, 1H), 2.51 (dd,  $J = 17.2, 7.9$  Hz, 1H), 2.34 – 2.15 (m, 2H), 2.01 (q,  $J = 4.6, 3.2$  Hz, 1H), 1.91 – 1.82 (m, 1H), 1.37 (s, 9H), 1.21 (s, 9H).  $^{13}\text{C}$  NMR (126 MHz,  $\text{CDCl}_3$ )  $\delta$  172.3, 171.7, 171.0, 170.9, 170.8, 161.8, 154.5, 133.8, 133.4, 132.5, 132.4, 130.3, 128.2, 128.0, 127.7, 127.53, 127.46, 127.3, 125.9, 125.5, 115.9, 113.4, 102.7, 102.0, 81.8, 81.0, 55.7, 54.3, 52.4, 52.2, 49.1, 39.3, 38.1, 31.5, 28.1, 27.9, 26.9. MS (ESI)  $m/z = 781.1 [M + Na]^+$ .

**5-(*tert*-Butyl) 1-methyl ((*S*)-4-(*tert*-butoxy)-2-((*S*)-3-(naphthalen-2-yl)-2-(5-(trifluoromethyl)-1*H*-indole-2-carboxamido)propanamido)-4-oxobutanoyl)-*L*-glutamate**

**(61o).** Yield, 75%. <sup>1</sup>H NMR (500 MHz, Chloroform-*d*) δ 10.87 (s, 1H), 8.48 (d, *J* = 8.4 Hz, 1H), 7.96 (s, 1H), 7.74 (s, 1H), 7.57 (d, *J* = 7.5 Hz, 1H), 7.52 – 7.33 (m, 6H), 7.23 – 6.97 (m, 4H), 5.51 (q, *J* = 7.6, 7.1 Hz, 1H), 5.01 (td, *J* = 8.2, 4.2 Hz, 1H), 4.35 (td, *J* = 7.5, 5.8 Hz, 1H), 3.69 (s, 3H), 3.25 (ddd, *J* = 37.9, 13.5, 7.1 Hz, 2H), 2.83 (dd, *J* = 17.4, 4.2 Hz, 1H), 2.68 (dd, *J* = 17.4, 8.4 Hz, 1H), 2.45 – 2.25 (m, 2H), 2.09 (ddt, *J* = 12.4, 8.5, 4.2 Hz, 1H), 2.01 – 1.93 (m, 1H), 1.46 (s, 9H), 1.33 (s, 9H). <sup>13</sup>C NMR (126 MHz, Chloroform-*d*) δ 172.1, 171.6, 171.4, 170.9, 170.7, 161.2, 138.1, 133.9, 133.3, 132.3, 132.0, 128.5, 128.0, 127.9, 127.33, 127.28, 126.6, 126.3, 125.8, 125.4, 124.2, 122.5 (q, *J* = 31.6 Hz), 122.0, 120.5, 119.7 (d, *J* = 4.6 Hz), 112.9, 103.5, 81.9, 81.1, 54.6, 52.4, 52.3, 49.0, 39.3, 38.8, 31.5, 28.1, 27.9, 26.9. MS (ESI) *m/z* = 819.3 [M + Na]<sup>+</sup>.

**5-(*tert*-Butyl) 1-methyl ((*S*)-4-(*tert*-butoxy)-2-((*S*)-3-(naphthalen-2-yl)-2-(5-nitro-1*H*-indole-2-carboxamido)propanamido)-4-oxobutanoyl)-*L*-glutamate (61p).** Yield, 71%. <sup>1</sup>H NMR (500 MHz, Chloroform-*d*) δ 11.00 (s, 1H), 8.58 (dd, *J* = 36.9, 5.3 Hz, 2H), 8.09 (dt, *J* = 13.5, 6.8 Hz, 2H), 7.63 (d, *J* = 7.5 Hz, 1H), 7.48 – 7.33 (m, 4H), 7.22 (d, *J* = 9.0 Hz, 1H), 7.17 – 7.03 (m, 4H), 5.49 (q, *J* = 7.7 Hz, 1H), 5.05 (td, *J* = 8.4, 4.4 Hz, 1H), 4.33 (q, *J* = 7.0 Hz, 1H), 3.71 (s, 3H), 3.27 (dd, *J* = 13.2, 7.1 Hz, 1H), 3.17 (dd, *J* = 13.4, 7.6 Hz, 1H), 2.84 (dd, *J* = 17.6, 4.3 Hz, 1H), 2.75 (dd, *J* = 17.5, 8.6 Hz, 1H), 2.45 – 2.25 (m, 2H), 2.10 – 1.98 (m, 2H), 1.46 (s, 9H), 1.35 (s, 9H). <sup>13</sup>C NMR (126 MHz, Chloroform-*d*) δ 172.0, 171.6, 171.4, 171.0, 170.7, 160.8, 142.1, 139.5, 133.9, 133.5, 133.2, 132.2, 128.0, 127.9, 127.2, 126.6, 125.8, 125.4, 119.3, 119.1, 112.5, 104.7, 82.1, 81.2, 54.9, 52.5, 52.3, 49.0, 39.2, 39.1, 31.4, 28.1, 27.9, 26.9. MS (ESI) *m/z* = 796.3 [M + Na]<sup>+</sup>.

**5-(*tert*-Butyl) 1-methyl ((*S*)-4-(*tert*-butoxy)-2-((*S*)-2-(5,7-dichloro-1*H*-indole-2-carboxamido)-3-(naphthalen-2-yl)propanamido)-4-oxobutanoyl)-*L*-glutamate (61q).** Yield, 79%. <sup>1</sup>H NMR (500 MHz, Acetone-*d*<sub>6</sub>) δ 10.75 (s, 1H), 8.31 (d, *J* = 7.7 Hz, 1H), 8.12 (d, *J* = 8.2 Hz, 1H), 7.92 – 7.72 (m, 4H), 7.62 (dd, *J* = 1.8, 0.6 Hz, 1H), 7.57 – 7.46 (m, 2H), 7.42 – 7.34 (m, 2H), 7.30 (d, *J* = 1.8 Hz, 1H), 5.01 (ddd, *J* = 9.5, 7.6, 5.0 Hz, 1H), 4.81 (dt, *J* = 8.2, 6.4 Hz, 1H), 4.51 (td, *J* = 8.4, 5.1 Hz, 1H), 3.70 (s, 3H), 3.50 (dd, *J* = 14.0, 5.0 Hz, 1H), 3.30 (dd, *J* = 14.1, 9.4 Hz, 1H), 2.82 (dd, *J* = 16.4, 6.1 Hz, 1H), 2.69 (dd, *J* = 16.4, 6.6 Hz, 1H), 2.42 – 2.25 (m, 2H), 2.14 – 2.06 (m, 1H), 1.90 (dtd, *J* = 13.9, 8.7, 6.2 Hz, 1H), 1.38 (s, 9H), 1.37 (s, 9H). <sup>13</sup>C NMR (126 MHz, Acetone-*d*<sub>6</sub>) δ 171.8, 171.7, 171.0, 170.2, 169.9, 160.7, 135.4, 133.64, 133.59, 132.5, 132.4, 129.6, 127.9, 127.8, 127.7, 127.50, 127.49, 125.9, 125.4, 125.2, 123.3, 120.0, 117.8, 104.4, 80.4, 79.7, 55.4, 51.6, 50.0, 37.3, 37.1, 30.9, 27.4, 27.3, 27.0. MS (ESI) *m/z* = 818.9 [M + Na]<sup>+</sup>.

**5-(*tert*-Butyl) 1-methyl ((*S*)-4-(*tert*-butoxy)-2-((*S*)-2-(4,6-dichloro-1*H*-indole-2-carboxamido)-3-(naphthalen-2-yl)propanamido)-4-oxobutanoyl)-*L*-glutamate (61r).** Yield, 76%. <sup>1</sup>H NMR (500 MHz, Chloroform-*d*) δ 10.78 (s, 1H), 8.72 (d, *J* = 8.6 Hz, 1H), 8.34 (s, 1H), 7.68 (d, *J* = 7.2 Hz, 1H), 7.50 – 7.29 (m, 4H), 7.20 – 6.97 (m, 6H), 5.54 (q, *J* = 7.9 Hz, 1H), 5.16 (td, *J* = 8.7, 4.5 Hz, 1H), 4.31 (q, *J* = 7.0 Hz, 1H), 3.72 (s, 3H), 3.24 (dd, *J* = 13.3, 7.3 Hz, 1H), 3.14 (dd, *J* = 13.3, 7.6 Hz, 1H), 2.90 (dd, *J* = 17.7, 4.3 Hz, 1H), 2.79 (dd, *J* = 17.5, 9.2 Hz, 1H), 2.39 (td, *J* = 7.8, 7.3, 2.4 Hz, 2H), 2.19 – 2.08 (m, 1H), 2.08 – 1.99 (m, 1H), 1.46 (s, 9H), 1.39 (s, 9H). <sup>13</sup>C NMR (126 MHz, Chloroform-*d*) δ 172.1, 172.0, 171.6, 171.0, 170.9, 160.9, 137.1, 134.2, 133.2, 132.1, 131.5, 129.1, 127.9, 127.8, 127.29, 127.26, 127.23, 127.1, 125.6, 125.3, 125.1, 120.1, 111.0, 101.2, 81.8, 81.1, 54.9, 52.4, 48.9, 39.3, 31.6, 26.8. MS (ESI) *m/z* = 818.9 [M + Na]<sup>+</sup>.

**(*S*)-4-((*S*)-3-Carboxy-2-((*S*)-2-(2-(5-chloro-1*H*-indol-3-yl)acetamido)-3-(naphthalen-2-yl)propanamido)propanamido)-5-methoxy-5-oxopentanoic acid (2).** <sup>1</sup>H NMR (500 MHz, DMSO-*d*<sub>6</sub>) δ 12.26 (s, 2H), 11.00 (d, *J* = 2.4 Hz, 1H), 8.50 (d, *J* = 7.7 Hz, 1H), 8.18 (dd, *J* = 18.8, 7.9 Hz, 2H), 7.88 – 7.74 (m, 1H), 7.74 – 7.58 (m, 3H), 7.52 (d, *J* = 2.0 Hz, 1H), 7.47 – 7.39 (m, 2H), 7.37 – 7.26 (m, 2H), 7.16 – 6.91 (m, 2H), 4.64 – 4.44 (m, 2H), 4.30 (ddd, *J* = 9.2, 7.5, 5.1 Hz, 1H), 3.62 (s, 3H), 3.53 – 3.39 (m, 2H), 3.16 (dd, *J* = 13.9, 4.0 Hz, 1H), 2.94 (dd, *J* = 13.9, 9.5 Hz,

1H), 2.69 (dd,  $J = 16.6, 5.3$  Hz, 1H), 2.54 (d,  $J = 8.3$  Hz, 1H), 2.29 (t,  $J = 7.6$  Hz, 2H), 1.96 (dtd,  $J = 13.1, 7.8, 5.2$  Hz, 1H), 1.86 – 1.65 (m, 1H).  $^{13}\text{C}$  NMR (126 MHz, DMSO- $d_6$ )  $\delta$  174.2, 172.4, 172.0, 171.7, 171.2, 171.0, 136.0, 134.99, 133.3, 132.2, 128.8, 128.4, 127.9, 127.83, 127.79, 127.70, 126.3, 126.0, 125.7, 123.5, 121.3, 118.5, 113.2, 109.0, 54.4, 52.4, 51.8, 50.0, 38.3, 36.5, 32.5, 30.2, 26.5. HRMS (ESI) Calcd for  $\text{C}_{33}\text{H}_{33}\text{ClN}_4\text{O}_9$  ( $\text{M} - \text{H}$ ) $^-$  663.1858, found 663.1860. HPLC purity 96.9%,  $t_{\text{R}} = 8.95$  min (condition A1); 97.8%,  $t_{\text{R}} = 11.17$  min (condition B1).

**(S)-4-((S)-3-Carboxy-2-((S)-2-(2-(6-chloro-1H-indol-3-yl)acetamido)-3-(naphthalen-2-yl)propanamido)propanamido)-5-methoxy-5-oxopentanoic acid (3).**  $^1\text{H}$  NMR (500 MHz, DMSO- $d_6$ )  $\delta$  12.27 (s, 2H), 10.89 (d,  $J = 2.4$  Hz, 1H), 8.49 (d,  $J = 7.7$  Hz, 1H), 8.21 (d,  $J = 8.2$  Hz, 1H), 8.16 (d,  $J = 7.6$  Hz, 1H), 7.91 – 7.80 (m, 1H), 7.79 – 7.64 (m, 3H), 7.53 – 7.43 (m, 2H), 7.38 (dd,  $J = 8.4, 1.7$  Hz, 1H), 7.29 (d,  $J = 1.8$  Hz, 1H), 7.13 – 7.03 (m, 2H), 6.54 (dd,  $J = 8.4, 1.9$  Hz, 1H), 4.66 – 4.55 (m, 2H), 4.31 (ddd,  $J = 9.3, 7.6, 5.1$  Hz, 1H), 3.62 (s, 3H), 3.53 – 3.41 (m, 2H), 3.19 (dd,  $J = 13.9, 3.8$  Hz, 1H), 2.93 (dd,  $J = 13.9, 10.1$  Hz, 1H), 2.70 (dd,  $J = 16.6, 5.2$  Hz, 1H), 2.59 – 2.51 (m, 1H), 2.30 (t,  $J = 7.6$  Hz, 2H), 1.97 (dtd,  $J = 13.1, 7.8, 5.1$  Hz, 1H), 1.81 (ddt,  $J = 14.0, 9.2, 7.2$  Hz, 1H).  $^{13}\text{C}$  NMR (126 MHz, DMSO- $d_6$ )  $\delta$  174.2, 172.4, 172.0, 171.8, 171.2, 170.9, 136.8, 136.0, 133.4, 132.3, 128.3, 127.9, 127.88, 127.86, 127.82, 126.33, 126.31, 126.0, 125.8, 125.4, 120.3, 118.9, 111.2, 109.4, 54.4, 52.4, 51.8, 50.0, 38.2, 36.5, 32.6, 30.2, 26.5. HRMS (ESI) Calcd for  $\text{C}_{33}\text{H}_{33}\text{ClN}_4\text{O}_9$  ( $\text{M} - \text{H}$ ) $^-$  663.1858, found 663.1865. HPLC purity 98.4%,  $t_{\text{R}} = 12.44$  min (condition A2); 100%,  $t_{\text{R}} = 14.77$  min (condition B2).

**(S)-4-((S)-3-Carboxy-2-((S)-2-(2-(5-chloro-1H-benzo[d]imidazol-2-yl)acetamido)-3-(naphthalen-2-yl)propanamido)propanamido)-5-methoxy-5-oxopentanoic acid (4).**  $^1\text{H}$  NMR (500 MHz, DMSO- $d_6$ )  $\delta$  8.72 (d,  $J = 8.1$  Hz, 1H), 8.56 (d,  $J = 7.6$  Hz, 1H), 8.17 (d,  $J = 7.6$  Hz, 1H), 7.93 – 7.69 (m, 1H), 7.68 – 7.60 (m, 4H), 7.56 (dd,  $J = 8.9, 2.5$  Hz, 1H), 7.44 – 7.33 (m, 3H), 7.31 (dt,  $J = 8.8, 2.0$  Hz, 1H), 4.64 (td,  $J = 8.8, 8.3, 3.8$  Hz, 1H), 4.57 (td,  $J = 8.1, 5.0$  Hz, 1H), 4.23 (td,  $J = 8.4, 5.2$  Hz, 1H), 4.01 – 3.75 (m, 2H), 3.55 (s, 3H), 3.19 (dd,  $J = 14.0, 3.8$  Hz, 1H), 2.86 (dd,  $J = 13.9, 9.9$  Hz, 1H), 2.65 (dd,  $J = 16.7, 5.0$  Hz, 1H), 2.56 – 2.44 (m, 1H), 2.23 (t,  $J = 7.6$  Hz, 2H), 2.03 – 1.83 (m, 1H), 1.73 (ddd,  $J = 16.4, 14.0, 7.5$  Hz, 1H).  $^{13}\text{C}$  NMR (126 MHz, DMSO- $d_6$ )  $\delta$  174.2, 172.4, 171.9, 171.3, 171.2, 166.0, 158.6, 150.5, 135.8, 133.3, 132.2, 128.6, 128.3, 128.0, 127.82, 127.80, 126.3, 125.8, 124.5, 116.0, 114.6, 54.7, 52.4, 51.8, 50.0, 38.5, 36.6, 34.9, 30.2, 26.5. HRMS (ESI) Calcd for  $\text{C}_{32}\text{H}_{32}\text{ClN}_5\text{O}_9$  ( $\text{M} - \text{H}$ ) $^-$  664.1810, found 664.1810. HPLC purity 99.2%,  $t_{\text{R}} = 7.47$  min (condition A1); 100%,  $t_{\text{R}} = 9.54$  min (condition B1).

**(S)-4-((S)-3-Carboxy-2-((S)-2-(2-(5-chlorobenzo[d]oxazol-2-yl)acetamido)-3-(naphthalen-2-yl)propanamido)propanamido)-5-methoxy-5-oxopentanoic acid (5).**  $^1\text{H}$  NMR (500 MHz, DMSO- $d_6$ )  $\delta$  12.27 (s, 2H), 8.67 (d,  $J = 8.3$  Hz, 1H), 8.55 (d,  $J = 7.7$  Hz, 1H), 8.20 (d,  $J = 7.6$  Hz, 1H), 7.97 – 7.81 (m, 1H), 7.79 – 7.69 (m, 4H), 7.56 (d,  $J = 8.7$  Hz, 1H), 7.53 – 7.30 (m, 4H), 4.79 – 4.55 (m, 2H), 4.31 (ddd,  $J = 9.2, 7.6, 5.1$  Hz, 1H), 3.97 – 3.79 (m, 2H), 3.62 (s, 3H), 3.24 (dd,  $J = 14.0, 3.9$  Hz, 1H), 2.94 (dd,  $J = 13.9, 9.8$  Hz, 1H), 2.72 (dd,  $J = 16.6, 5.1$  Hz, 1H), 2.61 – 2.51 (m, 1H), 2.30 (t,  $J = 7.5$  Hz, 2H), 1.97 (dtd,  $J = 13.1, 7.7, 5.1$  Hz, 1H), 1.80 (ddt,  $J = 14.1, 9.2, 7.2$  Hz, 1H).  $^{13}\text{C}$  NMR (126 MHz, DMSO- $d_6$ )  $\delta$  174.2, 172.4, 172.0, 171.3, 171.1, 165.7, 163.7, 149.6, 142.4, 135.8, 133.4, 132.3, 129.0, 128.3, 128.0, 127.9, 127.8, 126.3, 125.8, 125.4, 119.6, 112.4, 54.5, 52.4, 51.8, 50.0, 38.4, 36.5, 36.3, 30.2, 26.5. HRMS (ESI) Calcd for  $\text{C}_{32}\text{H}_{31}\text{ClN}_4\text{O}_{10}$  ( $\text{M} - \text{H}$ ) $^-$  665.1650, found 665.1650. HPLC purity 97.0%,  $t_{\text{R}} = 12.43$  min (condition A2); 96.6%,  $t_{\text{R}} = 14.93$  min (condition B2).

**(S)-4-((S)-3-Carboxy-2-((S)-2-(2-(6-chlorobenzo[d]oxazol-2-yl)acetamido)-3-(naphthalen-2-yl)propanamido)propanamido)-5-methoxy-5-oxopentanoic acid (6).**  $^1\text{H}$  NMR (500 MHz, DMSO- $d_6$ )  $\delta$  12.27 (s, 2H), 8.67 (d,  $J = 8.3$  Hz, 1H), 8.55 (d,  $J = 7.6$  Hz, 1H), 8.19 (d,  $J = 7.7$  Hz,

1H), 7.90 – 7.80 (m, 1H), 7.79 – 7.69 (m, 3H), 7.68 – 7.59 (m, 2H), 7.54 – 7.40 (m, 3H), 7.38 (dd,  $J = 8.4, 2.0$  Hz, 1H), 4.77 – 4.54 (m, 2H), 4.31 (ddd,  $J = 9.1, 7.5, 5.1$  Hz, 1H), 3.88 (d,  $J = 1.8$  Hz, 2H), 3.62 (s, 3H), 3.24 (dd,  $J = 13.9, 3.9$  Hz, 1H), 2.94 (dd,  $J = 13.9, 9.9$  Hz, 1H), 2.72 (dd,  $J = 16.6, 5.1$  Hz, 1H), 2.54 (dd,  $J = 16.8, 8.7$  Hz, 1H), 2.30 (t,  $J = 7.5$  Hz, 2H), 1.97 (dtd,  $J = 13.1, 7.7, 5.2$  Hz, 1H), 1.80 (ddt,  $J = 14.0, 9.1, 7.2$  Hz, 1H).  $^{13}\text{C}$  NMR (126 MHz, DMSO- $d_6$ )  $\delta$  174.2, 172.4, 172.0, 171.3, 171.1, 165.7, 162.9, 151.1, 140.2, 135.8, 133.4, 132.3, 129.7, 128.3, 128.0, 127.9, 127.87, 127.83, 126.3, 125.8, 125.2, 120.8, 111.6, 54.5, 52.4, 51.8, 50.0, 38.4, 36.6, 36.2, 30.2, 26.5. HRMS (ESI) Calcd for  $\text{C}_{32}\text{H}_{31}\text{ClN}_4\text{O}_{10}$  (M – H) $^-$  665.1650, found 665.1659. HPLC purity 98.1%,  $t_{\text{R}} = 12.42$  min (condition A2); 98.0%,  $t_{\text{R}} = 14.96$  min (condition B2).

**(S)-4-((S)-3-Carboxy-2-((S)-2-(2-(5-chlorobenzol[d]thiazol-2-yl)acetamido)-3-(naphthalen-2-yl)propanamido)propanamido)-5-methoxy-5-oxopentanoic acid (7).**  $^1\text{H}$  NMR (500 MHz, DMSO- $d_6$ )  $\delta$  12.26 (s, 2H), 8.70 (d,  $J = 8.3$  Hz, 1H), 8.57 (d,  $J = 7.6$  Hz, 1H), 8.19 (d,  $J = 7.6$  Hz, 1H), 8.04 – 7.87 (m, 2H), 7.83 – 7.74 (m, 1H), 7.75 – 7.56 (m, 3H), 7.52 – 7.18 (m, 4H), 4.70 (td,  $J = 9.2, 3.8$  Hz, 1H), 4.61 (td,  $J = 7.9, 5.1$  Hz, 1H), 4.31 (td,  $J = 8.3, 5.1$  Hz, 1H), 4.14 – 3.91 (m, 2H), 3.62 (s, 3H), 3.24 (dd,  $J = 14.0, 3.9$  Hz, 1H), 2.93 (dd,  $J = 13.9, 10.0$  Hz, 1H), 2.80 – 2.65 (m, 1H), 2.61 – 2.50 (m, 1H), 2.30 (t,  $J = 7.5$  Hz, 2H), 1.96 (ddd,  $J = 13.2, 9.4, 5.4$  Hz, 1H), 1.81 (ddd,  $J = 16.4, 14.1, 7.7$  Hz, 1H).  $^{13}\text{C}$  NMR (126 MHz, DMSO- $d_6$ )  $\delta$  174.2, 172.4, 172.0, 171.4, 171.1, 168.3, 167.3, 153.4, 135.8, 134.5, 133.3, 132.2, 131.1, 128.3, 128.0, 127.8, 127.8, 126.2, 125.8, 125.4, 123.8, 122.1, 54.4, 52.4, 51.8, 50.0, 41.0, 38.4, 36.5, 30.2, 26.5. HRMS (ESI) Calcd for  $\text{C}_{32}\text{H}_{31}\text{ClN}_4\text{O}_9\text{S}$  (M – H) $^-$  681.1422, found 681.1432. HPLC purity 100%,  $t_{\text{R}} = 12.74$  min (condition A2); 99.2%,  $t_{\text{R}} = 15.35$  min (condition B2).

**(S)-4-((S)-3-Carboxy-2-((S)-2-(2-(6-chlorobenzol[d]thiazol-2-yl)acetamido)-3-(naphthalen-2-yl)propanamido)propanamido)-5-methoxy-5-oxopentanoic acid (8).**  $^1\text{H}$  NMR (500 MHz, DMSO- $d_6$ )  $\delta$  8.71 (d,  $J = 8.3$  Hz, 1H), 8.58 (d,  $J = 7.6$  Hz, 1H), 8.21 (d,  $J = 7.6$  Hz, 1H), 8.03 (d,  $J = 2.2$  Hz, 1H), 7.86 (d,  $J = 8.7$  Hz, 1H), 7.81 – 7.74 (m, 1H), 7.74 – 7.65 (m, 3H), 7.48 (dd,  $J = 8.7, 2.2$  Hz, 1H), 7.45 – 7.36 (m, 3H), 4.70 (ddd,  $J = 10.1, 8.4, 4.0$  Hz, 1H), 4.61 (td,  $J = 8.1, 5.2$  Hz, 1H), 4.30 (ddd,  $J = 9.3, 7.6, 5.1$  Hz, 1H), 4.08 – 3.91 (m, 2H), 3.62 (s, 3H), 3.24 (dd,  $J = 13.9, 3.9$  Hz, 1H), 2.92 (dd,  $J = 13.9, 10.0$  Hz, 1H), 2.71 (dd,  $J = 16.6, 5.1$  Hz, 1H), 2.53 (dd,  $J = 16.0, 7.8$  Hz, 1H), 2.30 (t,  $J = 7.6$  Hz, 2H), 1.97 (dtd,  $J = 13.1, 7.8, 5.1$  Hz, 1H), 1.80 (ddt,  $J = 14.1, 9.3, 7.2$  Hz, 1H).  $^{13}\text{C}$  NMR (126 MHz, DMSO- $d_6$ )  $\delta$  174.2, 172.4, 172.0, 171.4, 171.2, 167.4, 166.9, 151.3, 137.3, 135.8, 133.3, 132.2, 129.8, 128.3, 128.0, 127.84, 127.81, 127.78, 126.7, 126.2, 125.7, 123.8, 121.9, 54.4, 52.40, 51.8, 50.0, 40.9, 38.4, 36.5, 30.2, 26.5. HRMS (ESI) Calcd for  $\text{C}_{32}\text{H}_{31}\text{ClN}_4\text{O}_9\text{S}$  (M – H) $^-$  681.1422, found 681.1425. HPLC purity 100%,  $t_{\text{R}} = 8.94$  min (condition A1); 100%,  $t_{\text{R}} = 11.18$  min (condition B1).

**(S)-4-((S)-3-Carboxy-2-((S)-2-(5-chloro-1H-indole-2-carboxamido)-3-(naphthalen-2-yl)propanamido)propanamido)-5-methoxy-5-oxopentanoic acid (9).**  $^1\text{H}$  NMR (500 MHz, DMSO- $d_6$ )  $\delta$  12.28 (s, 2H), 11.64 (d,  $J = 2.1$  Hz, 1H), 8.79 (d,  $J = 8.5$  Hz, 1H), 8.59 (d,  $J = 7.7$  Hz, 1H), 8.25 (d,  $J = 7.6$  Hz, 1H), 7.94 – 7.74 (m, 4H), 7.70 (d,  $J = 2.0$  Hz, 1H), 7.55 (dd,  $J = 8.5, 1.7$  Hz, 1H), 7.48 – 7.32 (m, 3H), 7.20 (d,  $J = 2.4$  Hz, 1H), 7.15 (dd,  $J = 8.7, 2.1$  Hz, 1H), 4.88 (ddd,  $J = 11.8, 8.5, 3.6$  Hz, 1H), 4.65 (td,  $J = 8.0, 5.2$  Hz, 1H), 4.30 (ddd,  $J = 9.2, 7.5, 5.2$  Hz, 1H), 3.63 (s, 3H), 3.42 – 3.27 (m, 1H), 3.14 (dd,  $J = 13.9, 10.9$  Hz, 1H), 2.72 (dd,  $J = 16.6, 5.2$  Hz, 1H), 2.58 (dd,  $J = 16.6, 8.3$  Hz, 1H), 2.40 – 2.28 (m, 2H), 2.00 – 1.94 (m, 1H), 1.84 – 1.75 (m, 1H).  $^{13}\text{C}$  NMR (126 MHz, DMSO- $d_6$ )  $\delta$  174.2, 172.5, 172.0, 171.8, 171.2, 161.0, 136.5, 135.2, 133.4, 133.1, 132.2, 128.5, 128.3, 127.9, 127.88, 127.85, 127.7, 126.4, 125.8, 124.6, 123.9, 121.1, 114.3, 103.3, 54.9, 52.4, 51.8, 50.0, 38.0, 36.6, 30.2, 26.5. HRMS (ESI) Calcd for  $\text{C}_{32}\text{H}_{31}\text{ClN}_4\text{O}_9$  (M – H) $^-$

649.1701, found 649.1700. HPLC purity 97.1%,  $t_R$  = 13.34 min (condition A2); 99.5%,  $t_R$  = 15.98 min (condition B2).

**(S)-4-((S)-3-Carboxy-2-((S)-2-(4-chloro-1H-indole-2-carboxamido)-3-(naphthalen-2-yl)propanamido)propanamido)-5-methoxy-5-oxopentanoic acid (10).**  $^1\text{H}$  NMR (500 MHz, DMSO- $d_6$ )  $\delta$  12.28 (s, 2H), 11.80 (d,  $J$  = 2.3 Hz, 1H), 8.88 (d,  $J$  = 8.6 Hz, 1H), 8.57 (d,  $J$  = 7.7 Hz, 1H), 8.24 (d,  $J$  = 7.6 Hz, 1H), 7.94 – 7.71 (m, 4H), 7.56 (dd,  $J$  = 8.4, 1.7 Hz, 1H), 7.42 (pd,  $J$  = 6.9, 1.5 Hz, 2H), 7.39 – 7.26 (m, 2H), 7.19 – 6.97 (m, 2H), 4.96 – 4.83 (m, 1H), 4.65 (td,  $J$  = 8.0, 5.1 Hz, 1H), 4.30 (ddd,  $J$  = 9.2, 7.5, 5.2 Hz, 1H), 3.62 (s, 3H), 3.43 – 3.23 (m, 1H), 3.14 (dd,  $J$  = 13.9, 11.0 Hz, 1H), 2.72 (dd,  $J$  = 16.6, 5.2 Hz, 1H), 2.58 (dd,  $J$  = 16.6, 8.3 Hz, 1H), 2.38 – 2.21 (m, 2H), 1.98 (dtd,  $J$  = 13.0, 7.7, 5.1 Hz, 1H), 1.92 – 1.76 (m, 1H).  $^{13}\text{C}$  NMR (126 MHz, DMSO- $d_6$ )  $\delta$  174.2, 172.5, 172.0, 171.8, 171.2, 160.9, 137.5, 136.6, 133.4, 132.4, 132.2, 128.3, 127.9, 127.86, 127.85, 127.7, 126.4, 126.1, 125.8, 124.6, 119.7, 111.9, 101.8, 54.9, 52.4, 51.8, 50.0, 37.9, 30.2, 26.5. HRMS (ESI) Calcd for  $\text{C}_{32}\text{H}_{31}\text{ClN}_4\text{O}_9$  ( $\text{M} - \text{H}$ ) $^-$  649.1701, found 649.1713. HPLC purity 99.7%,  $t_R$  = 13.26 min (condition A2); 100%,  $t_R$  = 16.03 min (condition B2).

**(S)-4-((S)-3-Carboxy-2-((S)-2-(6-chloro-1H-indole-2-carboxamido)-3-(naphthalen-2-yl)propanamido)propanamido)-5-methoxy-5-oxopentanoic acid (11).**  $^1\text{H}$  NMR (500 MHz, DMSO- $d_6$ )  $\delta$  12.29 (s, 2H), 11.57 (d,  $J$  = 2.2 Hz, 1H), 8.77 (d,  $J$  = 8.5 Hz, 1H), 8.59 (d,  $J$  = 7.7 Hz, 1H), 8.25 (d,  $J$  = 7.6 Hz, 1H), 7.93 – 7.71 (m, 4H), 7.64 (d,  $J$  = 8.5 Hz, 1H), 7.55 (dd,  $J$  = 8.5, 1.7 Hz, 1H), 7.50 – 7.33 (m, 3H), 7.24 (dd,  $J$  = 2.2, 0.9 Hz, 1H), 7.03 (dd,  $J$  = 8.5, 2.0 Hz, 1H), 5.01 – 4.77 (m, 1H), 4.65 (td,  $J$  = 8.0, 5.2 Hz, 1H), 4.30 (ddd,  $J$  = 9.2, 7.5, 5.2 Hz, 1H), 3.63 (s, 3H), 3.32 (dd,  $J$  = 13.9, 3.7 Hz, 1H), 3.13 (dd,  $J$  = 13.9, 10.9 Hz, 1H), 2.72 (dd,  $J$  = 16.6, 5.1 Hz, 1H), 2.58 (dd,  $J$  = 16.7, 8.3 Hz, 1H), 2.30 (dp,  $J$  = 9.0, 3.1, 2.6 Hz, 2H), 2.07 – 1.93 (m, 1H), 1.85 – 1.72 (m, 1H).  $^{13}\text{C}$  NMR (126 MHz, DMSO- $d_6$ )  $\delta$  174.2, 172.5, 172.0, 171.9, 171.2, 161.1, 137.1, 136.5, 133.4, 132.6, 132.2, 128.4, 128.3, 127.9, 127.88, 127.85, 127.7, 126.4, 126.2, 125.8, 123.6, 120.7, 112.1, 103.8, 54.8, 52.4, 51.8, 50.0, 38.0, 36.6, 30.2, 26.5. HRMS (ESI) Calcd for  $\text{C}_{32}\text{H}_{31}\text{ClN}_4\text{O}_9$  ( $\text{M} - \text{H}$ ) $^-$  649.1701, found 649.1701. HPLC purity 97.9%,  $t_R$  = 13.35 min (condition A2); 99.7%,  $t_R$  = 15.93 min (condition B2).

**(S)-4-((S)-3-Carboxy-2-((S)-2-(5-fluoro-1H-indole-2-carboxamido)-3-(naphthalen-2-yl)propanamido)propanamido)-5-methoxy-5-oxopentanoic acid (12).**  $^1\text{H}$  NMR (500 MHz, DMSO- $d_6$ )  $\delta$  12.28 (s, 2H), 11.53 (d,  $J$  = 2.3 Hz, 1H), 8.74 (d,  $J$  = 8.5 Hz, 1H), 8.58 (d,  $J$  = 7.7 Hz, 1H), 8.24 (d,  $J$  = 7.6 Hz, 1H), 7.99 – 7.72 (m, 4H), 7.55 (dd,  $J$  = 8.5, 1.7 Hz, 1H), 7.50 – 7.30 (m, 4H), 7.20 (d,  $J$  = 2.1 Hz, 1H), 7.01 (td,  $J$  = 9.2, 2.6 Hz, 1H), 4.96 – 4.83 (m, 1H), 4.65 (td,  $J$  = 8.0, 5.2 Hz, 1H), 4.30 (ddd,  $J$  = 9.2, 7.5, 5.2 Hz, 1H), 3.63 (s, 3H), 3.31 (s, 1H), 3.14 (dd,  $J$  = 13.9, 10.9 Hz, 1H), 2.72 (dd,  $J$  = 16.6, 5.2 Hz, 1H), 2.58 (dd,  $J$  = 16.6, 8.3 Hz, 1H), 2.38 – 2.25 (m, 2H), 2.06 – 1.89 (m, 1H), 1.89 – 1.74 (m, 1H).  $^{13}\text{C}$  NMR (126 MHz, DMSO- $d_6$ )  $\delta$  174.2, 172.5, 172.0, 171.9, 171.2, 161.1, 158.5, 156.6, 136.5, 133.6, 133.4, 133.3, 132.2, 128.3, 127.9, 127.88, 127.84, 127.7, 127.5, 127.4, 126.4, 125.8, 113.9, 113.8, 112.6, 112.4, 106.3, 106.1, 103.8, 103.7, 54.8, 52.4, 51.8, 50.0, 38.0, 36.6, 30.2, 26.5. HRMS (ESI) Calcd for  $\text{C}_{32}\text{H}_{31}\text{FN}_4\text{O}_9$  ( $\text{M} - \text{H}$ ) $^-$  633.1997, found 633.2003. HPLC purity 97.3%,  $t_R$  = 12.80 min (condition A2); 100%,  $t_R$  = 15.21 min (condition B2).

**(S)-4-((S)-2-((S)-2-(5-Bromo-1H-indole-2-carboxamido)-3-(naphthalen-2-yl)propanamido)-3-carboxypropanamido)-5-methoxy-5-oxopentanoic acid (13).**  $^1\text{H}$  NMR (500 MHz, DMSO- $d_6$ )  $\delta$  12.28 (s, 2H), 11.64 (d,  $J$  = 2.3 Hz, 1H), 8.78 (d,  $J$  = 8.5 Hz, 1H), 8.58 (d,  $J$  = 7.7 Hz, 1H), 8.24 (d,  $J$  = 7.6 Hz, 1H), 7.94 – 7.69 (m, 5H), 7.55 (dd,  $J$  = 8.5, 1.7 Hz, 1H), 7.42 (pd,  $J$  = 6.9, 1.6 Hz, 2H), 7.32 (d,  $J$  = 8.7 Hz, 1H), 7.25 (dd,  $J$  = 8.7, 1.9 Hz, 1H), 7.20 (d,  $J$  = 2.1 Hz, 1H), 5.12 – 4.81 (m, 1H), 4.65 (td,  $J$  = 7.9, 5.1 Hz, 1H), 4.30 (ddd,  $J$  = 9.2, 7.5, 5.1 Hz, 1H), 3.63 (s, 3H), 3.38 –

3.25 (m, 1H), 3.14 (dd,  $J = 13.9, 10.9$  Hz, 1H), 2.72 (dd,  $J = 16.6, 5.2$  Hz, 1H), 2.57 (dd,  $J = 16.6, 8.4$  Hz, 1H), 2.36 – 2.26 (m, 2H), 2.05 – 1.93 (m, 1H), 1.83 (ddt,  $J = 13.9, 7.9, 4.2$  Hz, 1H).  $^{13}\text{C}$  NMR (126 MHz, DMSO- $d_6$ )  $\delta$  174.2, 172.5, 172.0, 171.8, 171.2, 161.0, 136.5, 135.4, 133.4, 132.9, 132.2, 129.2, 128.3, 127.9, 127.88, 127.85, 127.7, 126.4, 125.8, 124.2, 114.7, 112.6, 103.2, 54.8, 52.4, 51.8, 50.0, 38.0, 36.6, 30.2, 26.5. HRMS (ESI) Calcd for  $\text{C}_{32}\text{H}_{31}\text{BrN}_4\text{O}_9$  ( $\text{M} - \text{H}$ ) $^-$  693.1196, 695.1176, found 693.1206, 695.1195. HPLC purity 97.5%,  $t_{\text{R}} = 13.48$  min (condition A2); 98.7%,  $t_{\text{R}} = 16.16$  min (condition B2).

**(S)-4-((S)-3-Carboxy-2-((S)-2-(5-methyl-1H-indole-2-carboxamido)-3-(naphthalen-2-yl)propanamido)propanamido)-5-methoxy-5-oxopentanoic acid (14).**  $^1\text{H}$  NMR (500 MHz, DMSO- $d_6$ )  $\delta$  12.28 (s, 2H), 11.28 (d,  $J = 2.2$  Hz, 1H), 8.59 (dd,  $J = 20.6, 8.0$  Hz, 2H), 8.23 (d,  $J = 7.6$  Hz, 1H), 7.92 – 7.71 (m, 4H), 7.55 (dd,  $J = 8.5, 1.7$  Hz, 1H), 7.45 – 7.33 (m, 3H), 7.25 (d,  $J = 8.3$  Hz, 1H), 7.10 (d,  $J = 2.2$  Hz, 1H), 6.98 (dd,  $J = 8.4, 1.6$  Hz, 1H), 4.87 (ddd,  $J = 11.8, 8.6, 3.7$  Hz, 1H), 4.65 (td,  $J = 7.9, 5.2$  Hz, 1H), 4.30 (td,  $J = 8.5, 5.4$  Hz, 1H), 3.63 (s, 3H), 3.30 (d,  $J = 7.8$  Hz, 1H), 3.14 (dd,  $J = 13.9, 10.8$  Hz, 1H), 2.72 (dd,  $J = 16.6, 5.2$  Hz, 1H), 2.58 (dd,  $J = 16.6, 8.3$  Hz, 1H), 2.39 – 2.24 (m, 5H), 2.09 – 1.91 (m, 1H), 1.84 (ddd,  $J = 11.6, 8.6, 6.2$  Hz, 1H).  $^{13}\text{C}$  NMR (126 MHz, DMSO- $d_6$ )  $\delta$  174.2, 172.5, 172.04, 171.96, 171.2, 161.5, 136.6, 135.3, 133.39, 132.2, 131.5, 128.7, 128.3, 127.9, 127.89, 127.84, 127.7, 127.6, 126.4, 125.8, 125.7, 121.2, 112.4, 103.3, 54.8, 52.4, 51.8, 50.0, 38.0, 36.6, 30.2, 26.5, 21.6. HRMS (ESI) Calcd for  $\text{C}_{33}\text{H}_{34}\text{N}_4\text{O}_9$  ( $\text{M} - \text{H}$ ) $^-$  629.2248, found 629.2250. HPLC purity 96.1%,  $t_{\text{R}} = 13.11$  min (condition A2); 97.0%,  $t_{\text{R}} = 15.63$  min (condition B2).

**(S)-4-((S)-3-Carboxy-2-((S)-2-(5-methoxy-1H-indole-2-carboxamido)-3-(naphthalen-2-yl)propanamido)propanamido)-5-methoxy-5-oxopentanoic acid (15).**  $^1\text{H}$  NMR (500 MHz, DMSO- $d_6$ )  $\delta$  12.29 (s, 2H), 11.26 (d,  $J = 2.2$  Hz, 1H), 8.59 (dd,  $J = 21.0, 8.0$  Hz, 2H), 8.24 (d,  $J = 7.6$  Hz, 1H), 7.85 – 7.70 (m, 4H), 7.55 (dd,  $J = 8.5, 1.7$  Hz, 1H), 7.49 – 7.29 (m, 2H), 7.25 (d,  $J = 8.9$  Hz, 1H), 7.09 (dd,  $J = 17.1, 2.3$  Hz, 2H), 6.80 (dd,  $J = 8.9, 2.5$  Hz, 1H), 4.98 – 4.80 (m, 1H), 4.65 (td,  $J = 8.0, 5.2$  Hz, 1H), 4.30 (ddd,  $J = 9.2, 7.5, 5.2$  Hz, 1H), 3.75 (s, 3H), 3.63 (s, 3H), 3.32 – 3.28 (m, 7H), 3.14 (dd,  $J = 13.9, 10.9$  Hz, 1H), 2.72 (dd,  $J = 16.6, 5.2$  Hz, 1H), 2.58 (dd,  $J = 16.6, 8.3$  Hz, 1H), 2.36 – 2.24 (m, 2H), 2.09 – 1.93 (m, 1H), 1.88 – 1.78 (m, 1H).  $^{13}\text{C}$  NMR (126 MHz, DMSO- $d_6$ )  $\delta$  174.2, 172.5, 172.04, 171.97, 171.2, 161.4, 154.1, 136.6, 133.4, 132.2, 132.1, 131.9, 128.4, 127.9, 127.8, 127.76, 127.71, 126.4, 125.8, 115.0, 113.5, 103.5, 102.5, 55.7, 54.8, 52.4, 51.8, 50.0, 38.0, 36.6, 30.2, 26.5. HRMS (ESI) Calcd for  $\text{C}_{33}\text{H}_{34}\text{N}_4\text{O}_{10}$  ( $\text{M} - \text{H}$ ) $^-$  645.2197, found 645.2200. HPLC purity 97.3%,  $t_{\text{R}} = 12.43$  min (condition A2); 97.9%,  $t_{\text{R}} = 14.81$  min (condition B2).

**(S)-4-((S)-3-Carboxy-2-((S)-3-(naphthalen-2-yl)-2-(5-(trifluoromethyl)-1H-indole-2-carboxamido)propanamido)propanamido)-5-methoxy-5-oxopentanoic acid (16).**  $^1\text{H}$  NMR (500 MHz, DMSO- $d_6$ )  $\delta$  12.27 (s, 2H), 11.88 (d,  $J = 2.2$  Hz, 1H), 8.88 (d,  $J = 8.6$  Hz, 1H), 8.60 (d,  $J = 7.7$  Hz, 1H), 8.25 (d,  $J = 7.6$  Hz, 1H), 8.08 (d,  $J = 1.7$  Hz, 1H), 7.85 (d,  $J = 1.6$  Hz, 1H), 7.81 – 7.71 (m, 3H), 7.59 – 7.50 (m, 2H), 7.48 – 7.36 (m, 4H), 5.01 – 4.74 (m, 1H), 4.66 (td,  $J = 7.9, 5.1$  Hz, 1H), 4.31 (ddd,  $J = 9.2, 7.5, 5.1$  Hz, 1H), 3.63 (s, 3H), 3.40 – 3.31 (m, 1H), 3.15 (dd,  $J = 13.8, 10.9$  Hz, 1H), 2.72 (dd,  $J = 16.6, 5.2$  Hz, 1H), 2.58 (dd,  $J = 16.6, 8.3$  Hz, 1H), 2.38 – 2.25 (m, 2H), 1.99 (td,  $J = 8.2, 4.1$  Hz, 1H), 1.88 – 1.75 (m, 1H).  $^{13}\text{C}$  NMR (126 MHz, DMSO- $d_6$ )  $\delta$  174.2, 172.4, 172.0, 171.8, 171.2, 160.9, 138.1, 136.5, 133.7, 133.4, 132.2, 128.3, 127.9, 127.8, 127.8, 126.9, 126.7, 126.4, 125.8, 124.8, 121.1, 120.9, 120.0, 104.6, 54.9, 52.4, 51.8, 50.0, 38.0, 36.6, 30.2, 26.6. HRMS (ESI) Calcd for  $\text{C}_{33}\text{H}_{31}\text{F}_3\text{N}_4\text{O}_9$  ( $\text{M} - \text{H}$ ) $^-$  683.1965, found 683.1976. HPLC purity 98.1%,  $t_{\text{R}} = 13.60$  min (condition A2); 99.0%,  $t_{\text{R}} = 16.12$  min (condition B2).

**(S)-4-((S)-3-Carboxy-2-((S)-3-(naphthalen-2-yl)-2-(5-nitro-1H-indole-2-carboxamido)propanamido)propanamido)-5-methoxy-5-oxopentanoic acid (17).** <sup>1</sup>H NMR (500 MHz, DMSO-*d*<sub>6</sub>) δ 12.21 (s, 2H), 9.03 (d, *J* = 8.6 Hz, 1H), 8.71 (d, *J* = 2.3 Hz, 1H), 8.61 (d, *J* = 7.6 Hz, 1H), 8.30 (d, *J* = 7.5 Hz, 1H), 8.03 (dd, *J* = 9.2, 2.3 Hz, 1H), 7.91 – 7.70 (m, 4H), 7.56 (dd, *J* = 8.5, 1.7 Hz, 1H), 7.51 (t, *J* = 4.4 Hz, 2H), 7.42 (pd, *J* = 6.8, 1.6 Hz, 2H), 4.92 (ddd, *J* = 11.9, 8.6, 3.6 Hz, 1H), 4.65 (td, *J* = 7.9, 5.1 Hz, 1H), 4.30 (td, *J* = 8.5, 5.4 Hz, 1H), 3.63 (s, 3H), 3.15 (dd, *J* = 13.9, 11.0 Hz, 2H), 2.72 (dd, *J* = 16.6, 5.1 Hz, 1H), 2.58 (dd, *J* = 16.6, 8.4 Hz, 1H), 2.36 – 2.22 (m, 2H), 2.09 – 1.91 (m, 1H), 1.83 (ddd, *J* = 14.5, 8.7, 6.4 Hz, 1H). <sup>13</sup>C NMR (126 MHz, DMSO-*d*<sub>6</sub>) δ 174.3, 172.5, 172.0, 171.7, 171.2, 160.6, 141.7, 139.7, 136.5, 135.1, 133.4, 132.2, 128.3, 127.9, 127.89, 127.86, 127.76, 126.69, 126.4, 125.8, 119.7, 118.9, 113.2, 106.1, 54.9, 52.4, 51.9, 50.1, 37.9, 36.6, 30.3, 26.5. HRMS (ESI) Calcd for C<sub>32</sub>H<sub>31</sub>N<sub>5</sub>O<sub>11</sub> (M – H)<sup>–</sup> 660.1942, found 660.1953. HPLC purity 98.1%, t<sub>R</sub> = 12.76 min (condition A2); 97.9%, t<sub>R</sub> = 15.30 min (condition B2).

**(S)-4-((S)-3-Carboxy-2-((S)-2-(5,7-dichloro-1H-indole-2-carboxamido)-3-(naphthalen-2-yl)propanamido)propanamido)-5-methoxy-5-oxopentanoic acid (18).** <sup>1</sup>H NMR (500 MHz, DMSO-*d*<sub>6</sub>) δ 12.30 (s, 2H), 11.90 (s, 1H), 8.90 (d, *J* = 8.4 Hz, 1H), 8.66 (d, *J* = 7.6 Hz, 1H), 8.24 (d, *J* = 7.6 Hz, 1H), 7.93 – 7.74 (m, 4H), 7.71 (d, *J* = 1.8 Hz, 1H), 7.53 (dd, *J* = 8.5, 1.7 Hz, 1H), 7.47 – 7.38 (m, 2H), 7.37 (d, *J* = 1.8 Hz, 1H), 7.16 (d, *J* = 1.2 Hz, 1H), 4.93 (ddd, *J* = 10.6, 8.5, 3.8 Hz, 1H), 4.65 (td, *J* = 8.0, 5.0 Hz, 1H), 4.31 (ddd, *J* = 9.2, 7.4, 5.1 Hz, 1H), 3.63 (s, 3H), 3.34 (d, *J* = 11.8 Hz, 1H), 3.09 (dd, *J* = 14.0, 10.7 Hz, 1H), 2.72 (dd, *J* = 16.6, 5.0 Hz, 1H), 2.57 (dd, *J* = 16.6, 8.6 Hz, 1H), 2.38 – 2.23 (m, 2H), 1.98 (dq, *J* = 10.5, 4.1, 2.6 Hz, 1H), 1.89 – 1.75 (m, 1H). <sup>13</sup>C NMR (126 MHz, DMSO-*d*<sub>6</sub>) δ 174.2, 172.5, 172.0, 171.7, 171.2, 160.1, 136.2, 134.6, 133.4, 132.8, 132.3, 129.4, 128.3, 127.91, 127.89, 127.8, 126.4, 125.9, 124.7, 123.3, 120.4, 117.8, 106.3, 100.0, 54.7, 52.4, 51.8, 50.1, 38.3, 36.6, 30.2, 26.6. HRMS (ESI) Calcd for C<sub>32</sub>H<sub>30</sub>Cl<sub>2</sub>N<sub>4</sub>O<sub>9</sub> (M – H)<sup>–</sup> 683.1312, found 683.1312. HPLC purity 98.2%, t<sub>R</sub> = 13.84 min (condition A2); 99.5%, t<sub>R</sub> = 16.89 min (condition B2).

**(S)-4-((S)-3-Carboxy-2-((S)-2-(4,6-dichloro-1H-indole-2-carboxamido)-3-(naphthalen-2-yl)propanamido)propanamido)-5-methoxy-5-oxopentanoic acid (19).** <sup>1</sup>H NMR (500 MHz, DMSO-*d*<sub>6</sub>) δ 12.28 (s, 2H), 11.94 (s, 1H), 8.95 (d, *J* = 8.6 Hz, 1H), 8.58 (d, *J* = 7.7 Hz, 1H), 8.24 (d, *J* = 7.6 Hz, 1H), 8.00 – 7.73 (m, 4H), 7.55 (dd, *J* = 8.5, 1.7 Hz, 1H), 7.47 – 7.31 (m, 4H), 7.21 (d, *J* = 1.7 Hz, 1H), 5.11 – 4.82 (m, 1H), 4.65 (td, *J* = 8.0, 5.2 Hz, 1H), 4.30 (ddd, *J* = 9.2, 7.5, 5.1 Hz, 1H), 3.63 (s, 3H), 3.36 – 3.23 (m, 1H), 3.13 (dd, *J* = 13.9, 11.0 Hz, 1H), 2.72 (dd, *J* = 16.6, 5.1 Hz, 1H), 2.58 (dd, *J* = 16.6, 8.4 Hz, 1H), 2.30 (dt, *J* = 8.0, 3.4 Hz, 2H), 1.98 (dtd, *J* = 13.1, 7.7, 5.1 Hz, 1H), 1.88 – 1.70 (m, 1H). <sup>13</sup>C NMR (126 MHz, DMSO-*d*<sub>6</sub>) δ 174.2, 172.5, 172.0, 171.7, 171.2, 160.6, 137.2, 136.5, 133.4, 133.3, 132.2, 128.3, 128.2, 127.92, 127.88, 127.85, 127.7, 126.8, 126.4, 125.8, 125.1, 119.9, 111.5, 101.9, 54.9, 52.4, 51.8, 50.0, 38.0, 36.6, 30.2, 26.5. HRMS (ESI) Calcd for C<sub>32</sub>H<sub>30</sub>Cl<sub>2</sub>N<sub>4</sub>O<sub>9</sub> (M – H)<sup>–</sup> 683.1312, found 683.1314. HPLC purity 99.1%, t<sub>R</sub> = 14.00 min (condition A2); 99.4%, t<sub>R</sub> = 17.02 min (condition B2).

**tert-Butyl (S)-5-(benzylamino)-4-(((benzyloxy)carbonyl)amino)-5-oxopentanoate (66a).** Yield, 89%. <sup>1</sup>H NMR (500 MHz, Chloroform-*d*) δ 7.19 (qd, *J* = 9.1, 7.7, 4.2 Hz, 7H), 7.13 – 7.09 (m, 3H), 6.99 (d, *J* = 6.1 Hz, 1H), 5.90 (d, *J* = 8.1 Hz, 1H), 4.89 (q, *J* = 12.3 Hz, 2H), 4.25 (tp, *J* = 19.5, 7.1, 6.4 Hz, 3H), 2.32 – 2.13 (m, 2H), 1.98 (dtd, *J* = 14.5, 7.3, 5.3 Hz, 1H), 1.83 (dt, *J* = 14.8, 7.4 Hz, 1H), 1.31 (s, 9H). <sup>13</sup>C NMR (126 MHz, Chloroform-*d*) δ 172.6, 171.4, 156.4, 138.0, 136.2, 128.6, 128.5, 128.1, 128.00, 127.6, 127.4, 80.8, 77.2, 66.9, 54.4, 43.4, 31.6, 28.1. MS (ESI) *m/z* = 449.2 [M + Na]<sup>+</sup>.

**tert-Butyl (S)-4-(((benzyloxy)carbonyl)amino)-5-oxo-5-(phenethylamino)pentanoate(66b).** Yield, 82%. <sup>1</sup>H NMR (500 MHz, Chloroform-*d*) δ 7.52 – 7.26 (m, 7H), 7.25 – 7.11 (m, 3H), 6.50 (d, *J* = 6.1 Hz, 1H), 5.82 (d, *J* = 7.9 Hz, 1H), 5.19 – 4.97 (m, 2H), 4.18 (q, *J* = 7.2 Hz, 1H), 3.72 – 3.41 (m, 2H), 2.81 (t, *J* = 7.1 Hz, 2H), 2.37 (dt, *J* = 16.4, 7.2 Hz, 1H), 2.25 (dt, *J* = 16.6, 7.0 Hz, 1H), 2.13 – 1.99 (m, 1H), 1.93 (s, 1H), 1.45 (s, 9H). <sup>13</sup>C NMR (126 MHz, Chloroform-*d*) δ 172.7, 171.2, 156.2, 138.7, 136.2, 128.7, 128.6, 128.5, 128.2, 128.0, 126.5, 80.9, 77.1, 67.0, 54.4, 40.7, 35.6, 31.7, 28.1. MS (ESI) *m/z* = 441.3 [M + H]<sup>+</sup>, MS (ESI) *m/z* = 463.2 [M + Na]<sup>+</sup>, MS (ESI) *m/z* = 903.4 [2M + Na]<sup>+</sup>.

**tert-Butyl (S)-4-(((benzyloxy)carbonyl)amino)-5-((4-fluorophenyl)amino)-5-oxopentanoate (66c).** Yield, 87%. <sup>1</sup>H NMR (500 MHz, Chloroform-*d*) δ 8.81 (s, 1H), 7.47 – 7.38 (m, 2H), 7.35 – 7.21 (m, 5H), 6.93 (t, *J* = 8.7 Hz, 2H), 6.03 (d, *J* = 7.8 Hz, 1H), 5.18 – 4.95 (m, 2H), 4.38 (t, *J* = 7.4 Hz, 1H), 2.48 (dt, *J* = 16.5, 7.2 Hz, 1H), 2.37 (dt, *J* = 16.7, 6.9 Hz, 1H), 2.21 – 2.10 (m, 1H), 2.07 – 1.92 (m, 1H), 1.44 (s, 9H). <sup>13</sup>C NMR (126 MHz, Chloroform-*d*) δ 173.0, 169.8, 159.4 (d, *J* = 243.5 Hz), 156.7, 136.0, 133.7, 128.5, 128.2, 128.0, 121.7 (d, *J* = 7.9 Hz), 115.5 (d, *J* = 22.5 Hz), 81.3, 67.2, 55.0, 31.8, 28.1, 28.0. MS (ESI) *m/z* = 453.2 [M + Na]<sup>+</sup>.

**tert-Butyl (S)-4-(((benzyloxy)carbonyl)amino)-5-((3-fluorophenyl)amino)-5-oxopentanoate(66d).** Yield, 84%. <sup>1</sup>H NMR (500 MHz, Chloroform-*d*) δ 8.85 (s, 1H), 7.46 (dt, *J* = 11.0, 2.4 Hz, 1H), 7.32 (q, *J* = 4.3 Hz, 5H), 7.21 (td, *J* = 8.2, 6.3 Hz, 1H), 7.16 – 7.06 (m, 1H), 6.95 – 6.59 (m, 1H), 5.92 (d, *J* = 7.7 Hz, 1H), 5.11 (d, *J* = 4.3 Hz, 2H), 4.36 (d, *J* = 7.1 Hz, 1H), 2.59 – 2.47 (m, 1H), 2.37 (ddd, *J* = 16.7, 7.3, 6.0 Hz, 1H), 2.15 (ddt, *J* = 13.8, 7.8, 6.0 Hz, 1H), 2.06 – 1.89 (m, 1H), 1.45 (s, 9H). <sup>13</sup>C NMR (126 MHz, Chloroform-*d*) δ 173.2, 169.8, 162.9 (d, *J* = 244.7 Hz), 156.6, 139.2 (d, *J* = 10.8 Hz), 136.0, 130.0 (d, *J* = 9.2 Hz), 128.6, 128.3, 128.0, 115.1 (d, *J* = 3.0 Hz), 111.1 (d, *J* = 21.3 Hz), 107.3 (d, *J* = 26.3 Hz), 81.5, 67.3, 55.0, 31.9, 28.1, 28.0. MS (ESI) *m/z* = 297.2 [M + H]<sup>+</sup>, MS (ESI) *m/z* = 453.2 [M + Na]<sup>+</sup>.

**tert-Butyl (S)-4-(((benzyloxy)carbonyl)amino)-5-((2-fluorophenyl)amino)-5-oxopentanoate (66e).** Yield, 88%. <sup>1</sup>H NMR (500 MHz, Chloroform-*d*) δ 8.62 (s, 1H), 8.37 – 8.09 (m, 1H), 7.43 – 7.28 (m, 5H), 7.06 (dtt, *J* = 14.0, 5.3, 2.6 Hz, 3H), 6.07 – 5.87 (m, 1H), 5.27 – 5.01 (m, 2H), 4.47 (t, *J* = 7.3 Hz, 1H), 2.48 (q, *J* = 8.0, 7.2 Hz, 1H), 2.38 (dt, *J* = 16.7, 6.8 Hz, 1H), 2.26 – 2.10 (m, 1H), 2.08 – 1.89 (m, 1H), 1.44 (s, 9H). <sup>13</sup>C NMR (126 MHz, Chloroform-*d*) δ 172.8, 170.0, 156.5, 152.9 (d, *J* = 243.8 Hz), 136.1, 128.5, 128.2, 128.1, 125.9 (d, *J* = 10.4 Hz), 124.8 (d, *J* = 7.4 Hz), 124.4 (d, *J* = 3.7 Hz), 122.2, 115.0 (d, *J* = 19.2 Hz), 81.2 (d, *J* = 4.1 Hz), 67.2, 55.1, 31.8, 28.0, 27.9. MS (ESI) *m/z* = 453.3 [M + Na]<sup>+</sup>.

**tert-Butyl (S)-5-(benzylamino)-4-((S)-2-(((benzyloxy)carbonyl)amino)-4-(tert-butoxy)-4-oxobutanamido)-5-oxopentanoate (67a).** Yield, 86%. <sup>1</sup>H NMR (500 MHz, Chloroform-*d*) δ 7.50 (d, *J* = 7.5 Hz, 1H), 7.44 – 7.31 (m, 7H), 7.27 (dd, *J* = 10.6, 3.4 Hz, 3H), 7.09 (d, *J* = 8.3 Hz, 1H), 5.89 (d, *J* = 8.3 Hz, 1H), 5.25 – 5.02 (m, 2H), 4.58 – 4.31 (m, 4H), 2.89 (dd, *J* = 16.9, 4.8 Hz, 1H), 2.70 (dd, *J* = 16.9, 6.1 Hz, 1H), 2.55 – 2.39 (m, 1H), 2.33 (dt, *J* = 17.0, 6.5 Hz, 1H), 2.22 – 2.12 (m, 1H), 2.02 (dt, *J* = 14.0, 7.1 Hz, 1H), 1.44 (s, 9H), 1.40 (s, 9H). <sup>13</sup>C NMR (126 MHz, Chloroform-*d*) δ 173.5, 170.9, 170.8, 170.6, 156.1, 138.2, 136.0, 128.61, 128.56, 128.3, 128.1, 127.6, 127.3, 82.0, 81.1, 67.3, 53.3, 51.7, 43.4, 37.3, 31.7, 28.04, 27.99, 27.0. MS (ESI) *m/z* = 620.3 [M + Na]<sup>+</sup>.

**tert-Butyl (S)-4-((S)-2-(((benzyloxy)carbonyl)amino)-4-(tert-butoxy)-4-oxobutanamido)-5-oxo-5-(phenethylamino)pentanoate (67b).** Yield, 83%. <sup>1</sup>H NMR (500 MHz, Chloroform-*d*) δ 7.41 – 7.27 (m, 8H), 7.24 – 7.12 (m, 3H), 6.62 (s, 1H), 5.84 (d, *J* = 8.4 Hz, 1H), 5.13 (q, *J* = 12.2 Hz, 2H), 4.45 (q, *J* = 7.3, 6.2 Hz, 1H), 4.32 (td, *J* = 8.0, 4.7 Hz, 1H), 3.49 (q, *J* = 7.3 Hz, 2H), 2.90 (dd, *J* = 17.0, 4.6 Hz, 1H), 2.85 – 2.75 (m, 2H), 2.67 (dd, *J* = 16.9, 5.9 Hz, 1H), 2.36 (ddd, *J* =



17.1, 8.0, 6.1 Hz, 1H), 2.24 (dt,  $J = 17.0, 6.5$  Hz, 1H), 2.06 (dt,  $J = 10.4, 5.5$  Hz, 1H), 1.91 (dd,  $J = 14.5, 7.4$  Hz, 1H), 1.43 (s, 9H), 1.42 (s, 9H).  $^{13}\text{C}$  NMR (126 MHz, Chloroform-*d*)  $\delta$  173.5, 171.0, 170.7, 170.5, 156.1, 138.8, 136.0, 128.7, 128.6, 128.3, 128.1, 126.5, 82.0, 81.0, 67.3, 53.3, 53.2, 51.6, 40.8, 37.3, 35.6, 31.6, 28.1, 28.0, 27.0. MS (ESI)  $m/z = 612.3$  [M + H] $^+$ , MS (ESI)  $m/z = 634.3$  [M + Na] $^+$ .

***tert*-Butyl (S)-4-((S)-2-(((benzyloxy)carbonyl)amino)-4-(*tert*-butoxy)-4-oxobutanamido)-5-((4-fluorophenyl)amino)-5-oxopentanoate (67c).** Yield, 86%.  $^1\text{H}$  NMR (500 MHz, Chloroform-*d*)  $\delta$  8.78 (s, 1H), 7.61 (d,  $J = 7.5$  Hz, 1H), 7.47 (dd,  $J = 8.9, 4.8$  Hz, 2H), 7.26 – 7.12 (m, 5H), 6.94 – 6.63 (m, 2H), 5.97 (d,  $J = 8.0$  Hz, 1H), 5.14 – 4.95 (m, 2H), 4.47 (dtd,  $J = 11.2, 7.9, 5.4$  Hz, 2H), 2.78 (dd,  $J = 16.9, 5.1$  Hz, 1H), 2.68 (dd,  $J = 16.8, 6.3$  Hz, 1H), 2.43 – 2.32 (m, 1H), 2.27 (dt,  $J = 17.0, 6.7$  Hz, 1H), 2.13 (q,  $J = 6.4, 6.0$  Hz, 1H), 2.00 – 1.90 (m, 1H), 1.34 (s, 9H), 1.31 (s, 9H).  $^{13}\text{C}$  NMR (126 MHz, Chloroform-*d*)  $\delta$  173.5, 171.2, 170.8, 169.1, 159.3 (d,  $J = 243.3$  Hz), 156.2, 136.0, 133.9 (d,  $J = 2.8$  Hz), 128.5, 128.3, 128.1, 121.9 (d,  $J = 7.8$  Hz), 115.3 (d,  $J = 22.4$  Hz), 82.0, 81.2, 67.3, 53.8, 51.8, 37.3, 31.7, 28.04, 27.98, 26.8. MS (ESI)  $m/z = 624.3$  [M + Na] $^+$ .

***tert*-Butyl (S)-4-((S)-2-(((benzyloxy)carbonyl)amino)-4-(*tert*-butoxy)-4-oxobutanamido)-5-((3-fluorophenyl)amino)-5-oxopentanoate (67d).** Yield, 84%.  $^1\text{H}$  NMR (500 MHz, Chloroform-*d*)  $\delta$  8.91 (s, 1H), 7.67 (d,  $J = 7.3$  Hz, 1H), 7.54 (dt,  $J = 11.2, 2.3$  Hz, 1H), 7.38 – 7.25 (m, 6H), 7.21 (td,  $J = 8.2, 6.4$  Hz, 1H), 6.77 (tdd,  $J = 8.3, 2.5, 1.0$  Hz, 1H), 5.95 (d,  $J = 7.9$  Hz, 1H), 5.21 – 5.03 (m, 2H), 4.67 – 4.41 (m, 2H), 2.88 (dd,  $J = 16.9, 4.9$  Hz, 1H), 2.76 (dd,  $J = 16.9, 6.2$  Hz, 1H), 2.48 (ddd,  $J = 17.1, 8.1, 5.9$  Hz, 1H), 2.35 (ddd,  $J = 17.1, 7.1, 5.8$  Hz, 1H), 2.20 (td,  $J = 8.4, 4.0$  Hz, 1H), 2.04 (q,  $J = 5.4, 3.4$  Hz, 1H), 1.43 (s, 9H), 1.41 (s, 9H).  $^{13}\text{C}$  NMR (126 MHz, Chloroform-*d*)  $\delta$  173.7, 171.3, 170.8, 169.2, 162.9 (d,  $J = 244.2$  Hz), 156.2, 139.4 (d,  $J = 10.7$  Hz), 135.9, 129.8 (d,  $J = 9.3$  Hz), 128.6, 128.3, 128.1, 115.4 (d,  $J = 2.8$  Hz), 110.9 (d,  $J = 21.3$  Hz), 107.5 (d,  $J = 26.3$  Hz), 82.2, 81.4, 67.4, 53.9, 51.8, 37.2, 31.8, 28.04, 27.99, 26.7. MS (ESI)  $m/z = 624.3$  [M + Na] $^+$ .

***tert*-Butyl (S)-4-((S)-2-(((benzyloxy)carbonyl)amino)-4-(*tert*-butoxy)-4-oxobutanamido)-5-((2-fluorophenyl)amino)-5-oxopentanoate (67e).** Yield, 85%.  $^1\text{H}$  NMR (500 MHz, Chloroform-*d*)  $\delta$  8.68 (s, 1H), 8.31 – 8.01 (m, 1H), 7.59 (d,  $J = 7.4$  Hz, 1H), 7.43 – 7.27 (m, 5H), 7.14 – 6.92 (m, 3H), 5.99 (d,  $J = 8.7$  Hz, 1H), 5.24 – 5.01 (m, 2H), 4.61 (ddt,  $J = 15.7, 10.5, 4.8$  Hz, 2H), 2.95 (dd,  $J = 17.1, 4.7$  Hz, 1H), 2.67 (dd,  $J = 17.1, 6.0$  Hz, 1H), 2.55 – 2.44 (m, 1H), 2.36 (dt,  $J = 17.0, 6.6$  Hz, 1H), 2.23 – 2.15 (m, 1H), 2.09 – 1.98 (m, 1H), 1.43 (s, 9H), 1.38 (s, 9H).  $^{13}\text{C}$  NMR (126 MHz, Chloroform-*d*)  $\delta$  173.3, 171.4, 170.9, 169.3, 156.0, 153.1 (d,  $J = 244.8$  Hz), 136.0, 128.5, 128.2, 128.1, 125.9 (d,  $J = 10.7$  Hz), 124.9 (d,  $J = 7.4$  Hz), 124.3 (d,  $J = 3.6$  Hz), 122.6, 115.0 (d,  $J = 19.1$  Hz), 81.9, 81.1, 67.3, 53.8, 51.4, 37.4, 31.6, 28.05, 27.97, 27.0. MS (ESI)  $m/z = 624.3$  [M + Na] $^+$ .

***tert*-Butyl 2-(((S)-1-(((S)-1-(((S)-1-(benzylamino)-5-(*tert*-butoxy)-1,5-dioxopentan-2-yl)amino)-4-(*tert*-butoxy)-1,4-dioxobutan-2-yl)amino)-3-(naphthalen-2-yl)-1-oxopropan-2-yl)carbonyl)-5-chloro-1*H*-indole-1-carboxylate (69a).** Yield, 89%.  $^1\text{H}$  NMR (500 MHz, Chloroform-*d*)  $\delta$  7.85 – 7.64 (m, 4H), 7.64 – 7.55 (m, 1H), 7.48 (d,  $J = 7.5$  Hz, 1H), 7.45 – 7.32 (m, 4H), 7.26 (dd,  $J = 8.5, 1.8$  Hz, 1H), 7.23 – 7.17 (m, 5H), 7.16 – 7.06 (m, 2H), 6.76 (d,  $J = 5.9$  Hz, 1H), 6.53 (d,  $J = 0.7$  Hz, 1H), 4.79 – 4.57 (m, 2H), 4.40 (ddd,  $J = 21.0, 13.9, 7.3$  Hz, 2H), 4.26 (dd,  $J = 14.9, 5.5$  Hz, 1H), 3.34 (dd,  $J = 14.4, 5.4$  Hz, 1H), 3.16 (dd,  $J = 14.4, 8.3$  Hz, 1H), 2.83 – 2.60 (m, 2H), 2.31 – 2.06 (m, 3H), 1.97 – 1.76 (m, 1H), 1.49 (s, 9H), 1.28 (s, 9H), 1.23 (s, 9H).  $^{13}\text{C}$  NMR (126 MHz, Chloroform-*d*)  $\delta$  172.5, 171.0, 170.7, 170.4, 170.3, 163.0, 149.4, 138.4, 134.7, 134.5, 133.4, 133.3, 132.6, 129.2, 129.1, 128.9, 128.8, 128.5, 128.0, 127.9, 127.8, 127.6, 127.1, 126.9, 126.5, 126.0, 121.4, 121.3, 116.6, 116.5, 111.2, 111.1, 86.0, 81.7, 80.4, 55.6, 53.2,

53.1, 51.0, 50.9, 43.3, 37.3, 36.7, 31.9, 28.1, 28.0, 27.92, 27.88, 27.8, 27.0. MS (ESI)  $m/z = 960.4$   $[M + Na]^+$ .

**tert-Butyl 2-(((S)-1-(((S)-4-(tert-butoxy)-1-(((S)-5-(tert-butoxy)-1,5-dioxo-1-(phenethylamino)pentan-2-yl)amino)-1,4-dioxobutan-2-yl)amino)-3-(naphthalen-2-yl)-1-oxopropan-2-yl)carbamoyl)-5-chloro-1H-indole-1-carboxylate (69b).** Yield, 84%.  $^1H$  NMR (500 MHz, Chloroform-*d*)  $\delta$  7.84 – 7.68 (m, 4H), 7.66 – 7.58 (m, 1H), 7.46 (d,  $J = 7.6$  Hz, 1H), 7.42 – 7.35 (m, 3H), 7.33 – 7.24 (m, 2H), 7.24 – 7.16 (m, 3H), 7.16 – 7.03 (m, 3H), 6.88 – 6.65 (m, 2H), 6.56 (d,  $J = 0.7$  Hz, 1H), 4.81 – 4.61 (m, 2H), 4.37 – 4.20 (m, 1H), 3.57 – 3.31 (m, 3H), 3.22 (dd,  $J = 14.4, 8.4$  Hz, 1H), 2.88 – 2.64 (m, 4H), 2.13 (ddd,  $J = 11.2, 5.4, 2.5$  Hz, 2H), 2.10 – 2.00 (m, 1H), 1.85 – 1.73 (m, 1H), 1.50 (s, 9H), 1.31 (s, 9H), 1.22 (s, 9H).  $^{13}C$  NMR (126 MHz, Chloroform-*d*)  $\delta$  172.5, 171.0, 170.7, 170.35, 170.32, 163.0, 149.4, 139.1, 134.6, 134.5, 133.5, 133.2, 132.6, 129.2, 129.1, 129.0, 128.8, 128.5, 128.0, 127.9, 127.8, 127.7, 127.5, 126.90, 126.87, 126.5, 126.2, 126.1, 121.4, 121.3, 116.6, 116.5, 111.3, 111.1, 86.1, 81.7, 80.4, 55.74, 55.66, 53.3, 53.2, 51.0, 50.9, 40.9, 37.3, 36.6, 35.6, 31.9, 28.2, 28.1, 28.02, 27.97, 27.9, 27.8, 26.8. MS (ESI)  $m/z = 974.4$   $[M + Na]^+$ .

**tert-Butyl 2-(((S)-1-(((S)-4-(tert-butoxy)-1-(((S)-5-(tert-butoxy)-1-((4-fluorophenyl)amino)-1,5-dioxopentan-2-yl)amino)-1,4-dioxobutan-2-yl)amino)-3-(naphthalen-2-yl)-1-oxopropan-2-yl)carbamoyl)-5-chloro-1H-indole-1-carboxylate (69c).** Yield, 86%.  $^1H$  NMR (500 MHz, Chloroform-*d*)  $\delta$  8.66 (s, 1H), 7.93 – 7.75 (m, 4H), 7.74 – 7.53 (m, 5H), 7.52 – 7.41 (m, 3H), 7.39 (dd,  $J = 8.4, 1.7$  Hz, 1H), 7.30 (dd,  $J = 9.0, 2.1$  Hz, 1H), 6.95 (t,  $J = 8.4$  Hz, 2H), 6.83 (s, 1H), 6.65 (s, 1H), 4.81 (dq,  $J = 13.4, 6.9, 6.3$  Hz, 2H), 4.51 (s, 1H), 3.55 (dd,  $J = 14.4, 5.2$  Hz, 1H), 3.30 (dd,  $J = 14.3, 8.6$  Hz, 1H), 2.88 (qd,  $J = 16.6, 6.4$  Hz, 2H), 2.52 – 2.20 (m, 3H), 2.04 – 1.95 (m, 1H), 1.58 (s, 9H), 1.39 (s, 9H), 1.29 (s, 9H).  $^{13}C$  NMR (126 MHz, Chloroform-*d*)  $\delta$  172.3, 171.4, 170.6, 170.2, 169.1, 163.4, 160.2, 158.2, 149.5, 134.6, 134.3, 134.29, 134.22, 133.5, 133.0, 132.7, 129.3, 129.1, 129.0, 127.9, 127.8, 127.6, 126.8, 126.7, 126.6, 126.2, 121.7, 121.6, 121.4, 116.6, 115.4, 115.2, 111.5, 86.3, 81.9, 80.5, 56.0, 53.8, 51.3, 37.2, 36.5, 32.0, 28.0, 27.96, 27.94, 26.7. MS (ESI)  $m/z = 964.1$   $[M + Na]^+$ .

**tert-Butyl 2-(((S)-1-(((S)-4-(tert-butoxy)-1-(((S)-5-(tert-butoxy)-1-((3-fluorophenyl)amino)-1,5-dioxopentan-2-yl)amino)-1,4-dioxobutan-2-yl)amino)-3-(naphthalen-2-yl)-1-oxopropan-2-yl)carbamoyl)-5-chloro-1H-indole-1-carboxylate (69d).** Yield, 88%.  $^1H$  NMR (500 MHz, Chloroform-*d*)  $\delta$  8.79 (d,  $J = 24.9$  Hz, 1H), 8.04 – 7.75 (m, 4H), 7.68 (d,  $J = 33.8$  Hz, 4H), 7.52 – 7.35 (m, 5H), 7.30 (dd,  $J = 8.9, 2.0$  Hz, 1H), 7.18 (s, 1H), 6.75 (t,  $J = 8.0$  Hz, 2H), 6.65 (s, 1H), 4.82 (s, 2H), 4.54 (s, 1H), 3.54 (dd,  $J = 14.0, 5.7$  Hz, 1H), 3.30 (dd,  $J = 14.4, 8.5$  Hz, 1H), 3.05 – 2.74 (m, 2H), 2.48 – 2.19 (m, 3H), 2.09 – 1.89 (m, 1H), 1.57 (s, 9H), 1.39 (s, 9H), 1.31 (s, 9H).  $^{13}C$  NMR (126 MHz, Chloroform-*d*)  $\delta$  172.3, 171.3, 170.6, 170.2, 169.4, 163.3, 161.9, 149.5, 139.8, 139.7, 134.7, 134.3, 133.5, 133.0, 132.7, 129.8, 129.7, 129.3, 129.1, 129.00, 128.0, 127.8, 127.6, 126.8, 126.7, 126.5, 126.1, 121.4, 116.6, 115.3, 111.5, 110.7, 110.6, 107.4, 107.2, 86.2, 81.9, 80.5, 56.0, 53.8, 51.2, 37.3, 36.6, 31.9, 28.0, 27.9, 26.8. MS (ESI)  $m/z = 964.1$   $[M + Na]^+$ .

**tert-Butyl 2-(((S)-1-(((S)-4-(tert-butoxy)-1-(((S)-5-(tert-butoxy)-1-((2-fluorophenyl)amino)-1,5-dioxopentan-2-yl)amino)-1,4-dioxobutan-2-yl)amino)-3-(naphthalen-2-yl)-1-oxopropan-2-yl)carbamoyl)-5-chloro-1H-indole-1-carboxylate (69e).** Yield, 84%.  $^1H$  NMR (500 MHz, Chloroform-*d*)  $\delta$  8.56 (d,  $J = 2.4$  Hz, 1H), 8.11 – 7.98 (m, 1H), 7.78 (d,  $J = 9.0$  Hz, 1H), 7.76 – 7.67 (m, 3H), 7.63 (d,  $J = 1.6$  Hz, 1H), 7.50 (dd,  $J = 21.4, 7.8$  Hz, 2H), 7.41 – 7.28 (m, 4H), 7.26 – 7.15 (m, 1H), 7.10 – 6.92 (m, 3H), 6.81 (d,  $J = 6.3$  Hz, 1H), 6.66 – 6.35 (m, 1H), 4.85 (dt,  $J = 7.9, 5.8$  Hz, 1H), 4.80 – 4.71 (m, 1H), 4.46 (td,  $J = 8.1, 5.2$  Hz, 1H), 3.43 (dd,  $J = 14.3, 5.5$  Hz, 1H), 3.25 (dd,  $J = 14.3, 8.1$  Hz, 1H), 2.76 (dd,  $J = 6.2, 2.2$  Hz, 2H), 2.43 – 2.02 (m, 3H), 1.86 (dtd,

$J = 14.4, 8.3, 6.0$  Hz, 1H), 1.48 (s, 9H), 1.29 (s, 9H), 1.25 (s, 9H).  $^{13}\text{C}$  NMR (126 MHz, Chloroform- $d$ )  $\delta$  172.5, 170.9, 170.6, 170.5, 169.3, 162.9, 154.1, 152.2, 149.3, 134.8, 134.6, 133.5, 132.6, 129.10, 129.07, 128.8, 128.0, 127.7, 127.6, 127.0, 126.5, 126.4, 126.1, 126.0, 124.8 (d,  $J = 7.6$  Hz), 124.2 (d,  $J = 3.7$  Hz), 122.8, 121.3, 116.5, 115.1, 114.9, 111.0, 85.9, 81.7, 80.7, 55.4, 53.9, 50.3, 37.4, 36.9, 31.8, 27.98, 27.97, 27.91, 26.8. MS (ESI)  $m/z = 964.4$  [M + Na] $^+$ .

**(S)-5-(Benzylamino)-4-((S)-3-carboxy-2-((S)-2-(5-chloro-1H-indole-2-carboxamido)-3-(naphthalen-2-yl)propanamido)propanamido)-5-oxopentanoic acid (22).**  $^1\text{H}$  NMR (500 MHz, DMSO- $d_6$ )  $\delta$  12.26 (s, 2H), 11.62 (d,  $J = 2.2$  Hz, 1H), 8.80 (d,  $J = 8.6$  Hz, 1H), 8.67 (d,  $J = 7.6$  Hz, 1H), 8.36 (t,  $J = 6.0$  Hz, 1H), 8.02 (d,  $J = 8.0$  Hz, 1H), 7.91 – 7.73 (m, 4H), 7.70 (d,  $J = 2.0$  Hz, 1H), 7.55 (dd,  $J = 8.5, 1.7$  Hz, 1H), 7.49 – 7.37 (m, 2H), 7.36 (d,  $J = 8.7$  Hz, 1H), 7.31 (dd,  $J = 8.1, 6.9$  Hz, 2H), 7.26 – 7.18 (m, 4H), 7.15 (dd,  $J = 8.7, 2.1$  Hz, 1H), 5.00 – 4.81 (m, 1H), 4.65 (td,  $J = 7.6, 6.0$  Hz, 1H), 4.30 (t,  $J = 5.8$  Hz, 3H), 3.28 (d,  $J = 3.5$  Hz, 1H), 3.15 (dd,  $J = 13.8, 11.0$  Hz, 1H), 2.81 (dd,  $J = 16.7, 6.0$  Hz, 1H), 2.60 (dd,  $J = 16.7, 7.6$  Hz, 1H), 2.26 (ddd,  $J = 9.2, 6.5, 3.0$  Hz, 2H), 1.99 (dddd,  $J = 14.0, 9.2, 6.8, 4.9$  Hz, 1H), 1.80 (dtd,  $J = 13.7, 9.0, 6.5$  Hz, 1H).  $^{13}\text{C}$  NMR (126 MHz, DMSO- $d_6$ )  $\delta$  174.4, 172.4, 172.0, 171.3, 170.9, 161.0, 139.7, 136.5, 135.2, 133.4, 133.1, 132.2, 128.7, 128.5, 128.3, 127.91, 127.90, 127.8, 127.7, 127.5, 127.2, 126.4, 125.8, 124.6, 123.9, 121.1, 114.3, 103.3, 54.8, 52.6, 50.2, 42.5, 38.0, 36.4, 30.5, 27.8. HRMS (ESI) Calcd for  $\text{C}_{38}\text{H}_{36}\text{ClN}_5\text{O}_8$  (M – H) $^-$  724.2174, found 724.2178. HPLC purity 100%,  $t_R = 9.85$  min (condition A1); 100%,  $t_R = 12.41$  min (condition B1).

**(S)-4-((S)-3-Carboxy-2-((S)-2-(5-chloro-1H-indole-2-carboxamido)-3-(naphthalen-2-yl)propanamido)propanamido)-5-oxo-5-(phenethylamino)pentanoic acid (23).**  $^1\text{H}$  NMR (500 MHz, DMSO- $d_6$ )  $\delta$  12.25 (s, 2H), 11.62 (d,  $J = 2.2$  Hz, 1H), 8.80 (d,  $J = 8.6$  Hz, 1H), 8.67 (d,  $J = 7.5$  Hz, 1H), 7.92 (dd,  $J = 6.7, 4.9$  Hz, 2H), 7.85 (d,  $J = 1.6$  Hz, 1H), 7.83 – 7.74 (m, 3H), 7.70 (d,  $J = 2.1$  Hz, 1H), 7.56 (dd,  $J = 8.5, 1.7$  Hz, 1H), 7.46 – 7.38 (m, 2H), 7.36 (d,  $J = 8.7$  Hz, 1H), 7.27 (dd,  $J = 8.1, 6.7$  Hz, 2H), 7.22 – 7.17 (m, 4H), 7.17 – 7.09 (m, 1H), 5.00 – 4.79 (m, 1H), 4.63 (td,  $J = 7.5, 6.1$  Hz, 1H), 4.21 (td,  $J = 8.2, 5.1$  Hz, 1H), 3.27 (qd,  $J = 7.4, 6.7, 5.0$  Hz, 3H), 3.18 – 3.05 (m, 1H), 2.79 (dd,  $J = 16.7, 6.1$  Hz, 1H), 2.71 (t,  $J = 7.4$  Hz, 2H), 2.60 (dd,  $J = 16.6, 7.5$  Hz, 1H), 2.20 (t,  $J = 8.0$  Hz, 2H), 1.92 (dtd,  $J = 16.3, 8.0, 5.1$  Hz, 1H), 1.79 – 1.65 (m, 1H).  $^{13}\text{C}$  NMR (126 MHz, DMSO- $d_6$ )  $\delta$  174.4, 172.4, 172.0, 171.0, 170.7, 161.0, 139.7, 136.5, 135.2, 133.4, 133.1, 132.2, 129.1, 128.7, 128.5, 128.3, 127.91, 127.90, 127.8, 127.7, 126.5, 126.4, 125.8, 124.6, 123.9, 121.1, 114.3, 103.3, 54.8, 52.5, 50.1, 40.7, 38.0, 36.4, 35.5, 30.4, 27.9. HRMS (ESI) Calcd for  $\text{C}_{39}\text{H}_{38}\text{ClN}_5\text{O}_8$  (M – H) $^-$  738.2331, found 738.2337. HPLC purity 99.1%,  $t_R = 9.96$  min (condition A1); 99.5%,  $t_R = 12.59$  min (condition B1).

**(S)-4-((S)-3-Carboxy-2-((S)-2-(5-chloro-1H-indole-2-carboxamido)-3-(naphthalen-2-yl)propanamido)propanamido)-5-((4-fluorophenyl)amino)-5-oxopentanoic acid (24).**  $^1\text{H}$  NMR (500 MHz, DMSO- $d_6$ )  $\delta$  12.31 (s, 2H), 11.80 – 11.30 (m, 1H), 9.93 (s, 1H), 8.84 (d,  $J = 8.5$  Hz, 1H), 8.67 (d,  $J = 7.6$  Hz, 1H), 8.18 (d,  $J = 7.7$  Hz, 1H), 7.89 – 7.73 (m, 4H), 7.70 (d,  $J = 2.0$  Hz, 1H), 7.66 – 7.61 (m, 2H), 7.56 (dd,  $J = 8.5, 1.7$  Hz, 1H), 7.42 (pd,  $J = 6.9, 1.6$  Hz, 2H), 7.36 (d,  $J = 8.7$  Hz, 1H), 7.21 (d,  $J = 2.0$  Hz, 1H), 7.18 – 7.07 (m, 3H), 4.91 (ddd,  $J = 11.7, 8.6, 3.7$  Hz, 1H), 4.66 (q,  $J = 7.1$  Hz, 1H), 4.39 (td,  $J = 8.2, 5.0$  Hz, 1H), 3.29 (d,  $J = 3.7$  Hz, 1H), 3.16 (dd,  $J = 13.9, 10.9$  Hz, 1H), 2.80 (dd,  $J = 16.6, 6.1$  Hz, 1H), 2.62 (dd,  $J = 16.6, 7.4$  Hz, 1H), 2.31 (pt,  $J = 9.0, 4.9$  Hz, 2H), 2.05 (td,  $J = 8.8, 5.0$  Hz, 1H), 1.88 (ddt,  $J = 13.5, 8.7, 4.6$  Hz, 1H).  $^{13}\text{C}$  NMR (126 MHz, DMSO- $d_6$ )  $\delta$  174.4, 172.5, 172.0, 171.2, 170.2, 161.1, 159.5, 157.6, 136.5, 135.5, 135.5, 135.2, 133.4, 133.1, 132.2, 128.5, 128.3, 127.9, 127.89, 127.85, 127.7, 126.4, 125.8, 124.6, 123.9, 121.8, 121.7, 121.1, 115.8, 115.6, 114.3, 103.3, 54.8, 53.3, 50.2, 38.0, 36.6, 30.6, 27.7.

HRMS (ESI) Calcd for C<sub>37</sub>H<sub>33</sub>ClFN<sub>5</sub>O<sub>8</sub> (M – H)<sup>-</sup> 728.1923, found 728.1936. HPLC purity 95.9%, t<sub>R</sub> = 10.03 min (condition A1); 98.6%, t<sub>R</sub> = 12.52 min (condition B1).

**(S)-4-((S)-3-Carboxy-2-((S)-2-(5-chloro-1H-indole-2-carboxamido)-3-(naphthalen-2-yl)propanamido)propanamido)-5-((3-fluorophenyl)amino)-5-oxopentanoic acid (25).** <sup>1</sup>H NMR (500 MHz, DMSO-*d*<sub>6</sub>) δ 12.31 (s, 2H), 11.62 (d, *J* = 2.2 Hz, 1H), 10.08 (s, 1H), 8.81 (d, *J* = 8.5 Hz, 1H), 8.67 (d, *J* = 7.5 Hz, 1H), 8.17 (d, *J* = 7.7 Hz, 1H), 7.93 – 7.73 (m, 4H), 7.70 (d, *J* = 2.1 Hz, 1H), 7.65 – 7.49 (m, 2H), 7.48 – 7.39 (m, 2H), 7.37 – 7.28 (m, 3H), 7.21 (d, *J* = 2.1 Hz, 1H), 7.15 (dd, *J* = 8.8, 2.1 Hz, 1H), 7.05 – 6.82 (m, 1H), 4.91 (ddd, *J* = 11.7, 8.5, 3.6 Hz, 1H), 4.67 (td, *J* = 7.6, 5.9 Hz, 1H), 4.41 (td, *J* = 8.3, 5.1 Hz, 1H), 3.30 (d, *J* = 3.5 Hz, 1H), 3.16 (dd, *J* = 13.9, 11.0 Hz, 1H), 2.81 (dd, *J* = 16.7, 5.8 Hz, 1H), 2.63 (dd, *J* = 16.7, 7.7 Hz, 1H), 2.42 – 2.20 (m, 2H), 2.05 (ddt, *J* = 14.7, 9.7, 5.7 Hz, 1H), 1.88 (ddt, *J* = 14.5, 9.1, 4.5 Hz, 1H). <sup>13</sup>C NMR (126 MHz, DMSO-*d*<sub>6</sub>) δ 174.3, 172.4, 172.1, 171.2, 170.7, 163.5, 161.6, 161.1, 140.9, 140.8, 136.5, 135.2, 133.4, 133.1, 132.2, 130.9, 130.8, 128.5, 128.3, 127.9, 127.88, 127.85, 127.7, 126.4, 125.8, 124.6, 123.9, 121.1, 115.6, 114.3, 110.5, 110.4, 106.8, 106.6, 103.3, 54.8, 53.4, 50.1, 38.0, 36.4, 30.5, 27.6. HRMS (ESI) Calcd for C<sub>37</sub>H<sub>33</sub>ClFN<sub>5</sub>O<sub>8</sub> (M – H)<sup>-</sup> 728.1923, found 728.1929. HPLC purity 95.6%, t<sub>R</sub> = 10.09 min (condition A1); 97.2%, t<sub>R</sub> = 12.61 min (condition B1).

**(S)-4-((S)-3-Carboxy-2-((S)-2-(5-chloro-1H-indole-2-carboxamido)-3-(naphthalen-2-yl)propanamido)propanamido)-5-((2-fluorophenyl)amino)-5-oxopentanoic acid (26).** <sup>1</sup>H NMR (500 MHz, DMSO-*d*<sub>6</sub>) δ 12.29 (s, 2H), 11.62 (d, *J* = 2.2 Hz, 1H), 9.72 (s, 1H), 8.80 (d, *J* = 8.5 Hz, 1H), 8.67 (d, *J* = 7.5 Hz, 1H), 8.15 (d, *J* = 7.7 Hz, 1H), 7.93 – 7.74 (m, 5H), 7.70 (d, *J* = 2.0 Hz, 1H), 7.56 (dd, *J* = 8.6, 1.7 Hz, 1H), 7.42 (pd, *J* = 6.9, 1.6 Hz, 2H), 7.36 (d, *J* = 8.7 Hz, 1H), 7.28 – 7.01 (m, 5H), 4.91 (ddd, *J* = 11.8, 8.6, 3.5 Hz, 1H), 4.68 (td, *J* = 7.6, 5.6 Hz, 1H), 4.55 (td, *J* = 8.2, 5.0 Hz, 1H), 3.30 (d, *J* = 3.4 Hz, 1H), 3.15 (dd, *J* = 13.8, 11.0 Hz, 1H), 2.80 (dd, *J* = 16.7, 5.6 Hz, 1H), 2.61 (dd, *J* = 16.6, 7.8 Hz, 1H), 2.34 (dq, *J* = 16.6, 10.6 Hz, 2H), 2.05 (ddt, *J* = 14.9, 10.3, 5.5 Hz, 1H), 1.90 (ddt, *J* = 13.8, 8.8, 4.7 Hz, 1H). <sup>13</sup>C NMR (126 MHz, DMSO-*d*<sub>6</sub>) δ 174.4, 172.2, 172.0, 171.2, 170.7, 161.0, 155.4, 153.4, 136.5, 135.2, 133.4, 133.1, 132.2, 128.5, 128.3, 127.9, 127.8, 127.7, 126.4, 126.2, 126.1, 126.0, 125.8, 125.0, 124.82, 124.79, 124.6, 123.9, 121.1, 116.1, 115.9, 114.3, 103.3, 54.8, 53.0, 50.1, 38.0, 36.4, 30.5, 27.8. HRMS (ESI) Calcd for C<sub>37</sub>H<sub>33</sub>ClFN<sub>5</sub>O<sub>8</sub> (M – H)<sup>-</sup> 728.1923, found 728.1929. HPLC purity 97.1%, t<sub>R</sub> = 9.87 min (condition A1); 99.3%, t<sub>R</sub> = 12.31 min (condition B1).

**tert-Butyl (S)-4-(((9H-fluoren-9-yl)methoxy)carbonyl)amino)-5-((4-chlorophenyl)amino)-5-oxopentanoate (70a).** Yield, 85%. <sup>1</sup>H NMR (500 MHz, Chloroform-*d*) δ 8.80 (s, 1H), 7.64 (d, *J* = 7.6 Hz, 2H), 7.55 – 7.41 (m, 2H), 7.40 – 7.32 (m, 2H), 7.28 (t, *J* = 7.5 Hz, 2H), 7.23 – 7.01 (m, 4H), 6.02 (d, *J* = 7.7 Hz, 1H), 4.29 (dd, *J* = 19.2, 7.0 Hz, 3H), 4.07 (t, *J* = 7.2 Hz, 1H), 2.57 – 2.37 (m, 1H), 2.29 (dt, *J* = 16.4, 6.7 Hz, 1H), 2.16 – 2.04 (m, 1H), 2.00 – 1.78 (m, 1H), 1.35 (s, 9H). <sup>13</sup>C NMR (126 MHz, Chloroform-*d*) δ 173.1, 169.9, 156.7, 143.7, 143.5, 141.3, 136.2, 129.4, 128.9, 127.8, 127.12, 127.09, 125.1, 125.0, 121.2, 120.0, 81.4, 67.4, 55.0, 47.0, 31.8, 28.1. MS (ESI) *m/z* = 557.3 [M + Na]<sup>+</sup>.

**tert-Butyl (S)-4-(((9H-fluoren-9-yl)methoxy)carbonyl)amino)-5-((3-chlorophenyl)amino)-5-oxopentanoate (70b).** Yield, 82%. <sup>1</sup>H NMR (500 MHz, Chloroform-*d*) δ 8.93 (s, 1H), 7.68 – 7.53 (m, 3H), 7.43 (dd, *J* = 13.0, 7.5 Hz, 2H), 7.29 – 7.18 (m, 3H), 7.15 – 7.07 (m, 2H), 7.02 (t, *J* = 8.1 Hz, 1H), 6.92 (d, *J* = 7.5 Hz, 1H), 6.14 (d, *J* = 7.9 Hz, 1H), 4.29 (dd, *J* = 42.7, 7.2 Hz, 3H), 4.13 – 3.89 (m, 1H), 2.37 (q, *J* = 7.9, 7.2 Hz, 1H), 2.28 (dt, *J* = 16.5, 6.8 Hz, 1H), 2.14 – 2.01 (m, 1H), 1.94 (h, *J* = 5.9, 4.6 Hz, 1H), 1.32 (s, 9H). <sup>13</sup>C NMR (126 MHz, Chloroform-*d*) δ 173.0, 170.2, 156.8, 143.7, 143.5, 141.3, 138.9, 134.6, 129.9, 127.80, 127.79, 127.14, 127.10, 125.1, 125.0,

124.5, 120.1, 120.0, 117.9, 81.3, 67.5, 55.1, 47.0, 31.8, 28.1, 28.0. MS (ESI)  $m/z = 557.4$  [M + Na]<sup>+</sup>.

**tert-Butyl (S)-4-(((9H-fluoren-9-yl)methoxy)carbonyl)amino)-5-((2-chlorophenyl)amino)-5-oxopentanoate (70c).** Yield, 80%. <sup>1</sup>H NMR (500 MHz, Chloroform-*d*)  $\delta$  8.52 (s, 1H), 8.21 (dd,  $J = 8.3, 1.6$  Hz, 1H), 7.65 (d,  $J = 7.6$  Hz, 2H), 7.49 (d,  $J = 7.4$  Hz, 2H), 7.32 – 7.23 (m, 3H), 7.23 – 7.10 (m, 3H), 6.95 (td,  $J = 7.7, 1.6$  Hz, 1H), 5.95 (d,  $J = 7.4$  Hz, 1H), 4.59 – 4.26 (m, 3H), 4.12 (t,  $J = 6.9$  Hz, 1H), 2.41 (q,  $J = 8.2, 6.9$  Hz, 1H), 2.30 (dt,  $J = 16.8, 6.6$  Hz, 1H), 2.15 (dd,  $J = 14.5, 7.3$  Hz, 1H), 2.00 – 1.88 (m, 1H), 1.37 (s, 9H). <sup>13</sup>C NMR (126 MHz, Chloroform-*d*)  $\delta$  172.9, 169.8, 156.5, 143.8, 143.7, 141.3, 134.2, 129.1, 127.8, 127.6, 127.11, 127.09, 125.14, 125.07, 123.6, 122.0, 120.02, 120.01, 81.3, 67.3, 55.6, 47.1, 31.8, 28.10 27.5. MS (ESI)  $m/z = 557.3$  [M + Na]<sup>+</sup>.

**tert-Butyl (S)-4-((S)-2-(((9H-fluoren-9-yl)methoxy)carbonyl)amino)-4-(tert-butoxy)-4-oxobutanamido)-5-((4-chlorophenyl)amino)-5-oxopentanoate (71a).** Yield, 88%. <sup>1</sup>H NMR (500 MHz, DMSO-*d*<sub>6</sub>)  $\delta$  10.05 (s, 1H), 8.16 (d,  $J = 7.7$  Hz, 1H), 7.89 (d,  $J = 7.6$  Hz, 2H), 7.69 (q,  $J = 6.2, 5.3$  Hz, 2H), 7.62 (d,  $J = 8.5$  Hz, 2H), 7.51 – 7.14 (m, 6H), 4.64 – 4.14 (m, 5H), 2.69 (dd,  $J = 16.2, 5.0$  Hz, 1H), 2.50 (s, 1H), 2.36 – 2.16 (m, 2H), 2.00 – 1.93 (m, 1H), 1.84 (ddt,  $J = 13.6, 8.7, 4.6$  Hz, 1H), 1.36 (s, 9H), 1.34 (s, 9H). <sup>13</sup>C NMR (126 MHz, DMSO-*d*<sub>6</sub>)  $\delta$  171.9, 171.3, 170.4, 169.8, 156.3, 144.3, 144.2, 141.2, 138.1, 129.1, 128.1, 127.5, 125.7, 121.4, 120.6, 80.7, 80.2, 66.2, 53.3, 51.8, 47.1, 37.9, 31.6, 31.2, 28.1, 27.5. MS (ESI)  $m/z = 728.3$  [M + Na]<sup>+</sup>.

**tert-Butyl (S)-4-((S)-2-(((9H-fluoren-9-yl)methoxy)carbonyl)amino)-4-(tert-butoxy)-4-oxobutanamido)-5-((3-chlorophenyl)amino)-5-oxopentanoate (71b).** Yield, 85%. <sup>1</sup>H NMR (500 MHz, Chloroform-*d*)  $\delta$  8.89 (s, 1H), 7.87 – 7.65 (m, 4H), 7.59 (d,  $J = 7.5$  Hz, 2H), 7.56 – 7.50 (m, 1H), 7.40 (ddd,  $J = 9.4, 7.4, 1.8$  Hz, 2H), 7.30 (tdd,  $J = 7.4, 2.4, 1.2$  Hz, 2H), 7.20 (t,  $J = 8.1$  Hz, 1H), 7.06 (ddd,  $J = 8.0, 2.1, 1.0$  Hz, 1H), 5.90 (d,  $J = 7.8$  Hz, 1H), 4.72 – 4.35 (m, 4H), 4.23 (t,  $J = 6.9$  Hz, 1H), 2.89 (dd,  $J = 16.8, 4.8$  Hz, 1H), 2.80 (dd,  $J = 16.9, 6.3$  Hz, 1H), 2.58 – 2.49 (m, 1H), 2.38 (dt,  $J = 17.2, 6.7$  Hz, 1H), 2.22 (tt,  $J = 9.0, 4.5$  Hz, 1H), 2.14 – 2.07 (m, 1H), 1.44 (s, 9H), 1.44 (s, 9H). <sup>13</sup>C NMR (126 MHz, Chloroform-*d*)  $\delta$  174.0, 171.1, 170.9, 169.1, 156.2, 143.7, 143.6, 141.3, 139.1, 134.4, 129.8, 127.8, 127.1, 125.0, 124.3, 120.1, 120.0, 118.1, 82.3, 81.5, 67.4, 54.1, 51.8, 47.1, 37.4, 31.9, 29.3, 28.0, 26.5. MS (ESI)  $m/z = 728.3$  [M + Na]<sup>+</sup>.

**tert-Butyl (S)-4-((S)-2-(((9H-fluoren-9-yl)methoxy)carbonyl)amino)-4-(tert-butoxy)-4-oxobutanamido)-5-((2-chlorophenyl)amino)-5-oxopentanoate (71c).** Yield, 85%. <sup>1</sup>H NMR (500 MHz, Chloroform-*d*)  $\delta$  8.62 (s, 1H), 8.24 (dd,  $J = 8.3, 1.5$  Hz, 1H), 7.76 (d,  $J = 7.6$  Hz, 2H), 7.62 (d,  $J = 8.0$  Hz, 3H), 7.48 – 7.28 (m, 5H), 7.27 – 7.19 (m, 1H), 7.04 (td,  $J = 7.7, 1.6$  Hz, 1H), 5.98 (d,  $J = 8.8$  Hz, 1H), 4.68 – 4.57 (m, 2H), 4.44 (d,  $J = 7.1$  Hz, 2H), 4.24 (t,  $J = 7.0$  Hz, 1H), 3.20 – 2.97 (m, 1H), 2.76 – 2.59 (m, 1H), 2.54 (ddd,  $J = 17.1, 8.1, 5.8$  Hz, 1H), 2.39 (ddd,  $J = 17.2, 7.1, 5.7$  Hz, 1H), 2.24 (ddd,  $J = 13.5, 8.4, 5.6$  Hz, 1H), 2.13 – 2.05 (m, 1H), 1.45 (s, 9H), 1.43 (s, 9H). <sup>13</sup>C NMR (126 MHz, Chloroform-*d*)  $\delta$  173.4, 171.4, 171.1, 169.1, 156.0, 143.8, 143.7, 141.32, 141.31, 134.3, 129.1, 127.8, 127.5, 127.12, 127.09, 125.1, 123.9, 122.4, 120.01, 120.00, 82.0, 81.2, 67.4, 54.1, 51.4, 47.2, 37.4, 31.6, 28.1, 28.0, 26.7. MS (ESI)  $m/z = 728.3$  [M + Na]<sup>+</sup>.

**tert-Butyl 2-(((S)-1-(((S)-4-(tert-butoxy)-1-(((S)-5-(tert-butoxy)-1-((4-chlorophenyl)amino)-1,5-dioxopentan-2-yl)amino)-1,4-dioxobutan-2-yl)amino)-3-(naphthalen-2-yl)-1-oxopropan-2-yl)carbonyl)-5-chloro-1H-indole-1-carboxylate (72a).** Yield, 85%. <sup>1</sup>H NMR (500 MHz, Chloroform-*d*)  $\delta$  8.65 (s, 1H), 7.92 – 7.74 (m, 4H), 7.74 – 7.66 (m, 3H), 7.60 (dd,  $J = 17.5, 7.5$  Hz, 2H), 7.52 – 7.46 (m, 2H), 7.45 (d,  $J = 2.1$  Hz, 1H), 7.39 (dd,  $J = 8.4, 1.8$  Hz, 1H), 7.31 (dd,  $J = 9.0, 2.1$  Hz, 1H), 7.25 (d,  $J = 8.2$  Hz, 2H), 6.75 (d,  $J = 5.0$  Hz, 1H), 6.65 (d,  $J = 0.7$  Hz, 1H), 4.78 (tt,  $J = 8.1, 3.8$  Hz, 2H), 4.48 (td,  $J = 9.4, 8.8, 3.4$  Hz, 1H), 3.56 (dd,  $J = 14.4, 5.2$  Hz, 1H), 3.30 (dd,  $J = 14.4, 8.8$  Hz, 1H), 2.97 – 2.77 (m, 2H), 2.40 – 2.22 (m, 3H), 2.05 – 1.84 (m, 1H), 1.58 (s,

9H), 1.39 (s, 9H), 1.29 (s, 9H). <sup>13</sup>C NMR (126 MHz, Chloroform-*d*) δ 172.3, 171.4, 170.6, 170.2, 169.3, 163.4, 149.6, 136.9, 134.6, 134.2, 133.5, 132.9, 132.7, 129.3, 129.1, 128.9, 128.7, 127.9, 127.8, 127.6, 126.71, 126.69, 126.61, 126.2, 121.5, 121.3, 116.6, 111.5, 86.4, 81.9, 80.5, 56.2 53.8, 51.4, 37.1, 36.3, 32.0, 29.3, 28.02, 27.98, 27.93, 26.5. MS (ESI) *m/z* = 980.1 [M + Na]<sup>+</sup>.

***tert*-Butyl 2-(((*S*)-1-(((*S*)-4-(*tert*-butoxy)-1-(((*S*)-5-(*tert*-butoxy)-1-((3-chlorophenyl)amino)-1,5-dioxopentan-2-yl)amino)-1,4-dioxobutan-2-yl)amino)-3-(naphthalen-2-yl)-1-oxopropan-2-yl)carbamoyl)-5-chloro-1*H*-indole-1-carboxylate (72b).** Yield, 83%. <sup>1</sup>H NMR (500 MHz, Chloroform-*d*) δ 8.80 (s, 1H), 7.88 – 7.76 (m, 5H), 7.73 – 7.52 (m, 4H), 7.51 – 7.35 (m, 4H), 7.30 (dd, *J* = 9.0, 2.1 Hz, 1H), 7.16 (t, *J* = 8.1 Hz, 1H), 7.08 – 6.96 (m, 1H), 6.86 (s, 1H), 6.65 (s, 1H), 4.88 (s, 1H), 4.85 – 4.70 (m, 1H), 4.55 (s, 1H), 3.55 (dd, *J* = 14.3, 5.3 Hz, 1H), 3.30 (dd, *J* = 14.4, 8.4 Hz, 1H), 2.87 (qd, *J* = 16.6, 6.4 Hz, 2H), 2.48 – 2.16 (m, 3H), 2.07 – 1.87 (m, 1H), 1.57 (s, 9H), 1.39 (s, 9H), 1.31 (s, 9H). <sup>13</sup>C NMR (126 MHz, Chloroform-*d*) δ 172.3, 171.3, 170.6, 170.2, 169.4, 163.3, 149.5, 139.4, 134.7, 134.3, 134.2, 133.5, 133.1, 132.7, 129.7, 129.3, 129.1, 129.0, 128.0, 127.8, 127.6, 126.8, 126.6, 126.5, 126.1, 124.0, 121.4, 120.0, 117.9, 116.6, 111.4, 86.2, 81.9, 80.5, 56.0, 53.8, 51.2, 37.3, 36.6, 31.9, 28.02, 27.97, 27.94, 26.8. MS (ESI) *m/z* = 980.4 [M + Na]<sup>+</sup>.

***tert*-Butyl 2-(((*S*)-1-(((*S*)-4-(*tert*-butoxy)-1-(((*S*)-5-(*tert*-butoxy)-1-((2-chlorophenyl)amino)-1,5-dioxopentan-2-yl)amino)-1,4-dioxobutan-2-yl)amino)-3-(naphthalen-2-yl)-1-oxopropan-2-yl)carbamoyl)-5-chloro-1*H*-indole-1-carboxylate (72c).** Yield, 82%. <sup>1</sup>H NMR (500 MHz, Chloroform-*d*) δ 8.54 (s, 1H), 8.13 (dd, *J* = 8.2, 1.5 Hz, 1H), 7.78 (d, *J* = 8.9 Hz, 1H), 7.75 – 7.66 (m, 3H), 7.66 – 7.58 (m, 1H), 7.49 (d, *J* = 8.3 Hz, 1H), 7.45 – 7.30 (m, 5H), 7.27 (dd, *J* = 8.1, 1.5 Hz, 1H), 7.23 – 7.17 (m, 1H), 7.14 (td, *J* = 8.4, 8.0, 1.5 Hz, 1H), 6.95 (td, *J* = 7.7, 1.5 Hz, 1H), 6.78 (d, *J* = 6.3 Hz, 1H), 6.55 (s, 1H), 4.82 (dt, *J* = 8.1, 5.8 Hz, 2H), 4.47 – 4.32 (m, 1H), 3.44 (dd, *J* = 14.3, 5.6 Hz, 1H), 3.26 (dd, *J* = 14.3, 8.1 Hz, 1H), 2.86 – 2.70 (m, 2H), 2.42 – 2.06 (m, 3H), 1.89 – 1.71 (m, 1H), 1.48 (s, 9H), 1.29 (s, 9H), 1.25 (s, 9H). <sup>13</sup>C NMR (126 MHz, Chloroform-*d*) δ 172.5, 171.0, 170.6, 170.4, 169.2, 162.9, 149.3, 134.7, 134.6, 134.5, 133.49, 133.47, 132.6, 129.11, 129.09, 128.8, 128.0, 127.7, 127.6, 127.4, 127.0, 126.5, 126.4, 126.0, 125.0, 124.1, 122.6, 121.3, 116.5, 111.0, 86.0, 81.7, 80.7, 55.4, 54.1, 50.2, 37.2, 36.8, 31.7, 28.0, 27.9, 26.5. MS (ESI) *m/z* = 980.0 [M + Na]<sup>+</sup>.

**(*S*)-4-((*S*)-3-Carboxy-2-((*S*)-2-(5-chloro-1*H*-indole-2-carboxamido)-3-(naphthalen-2-yl)propanamido)propanamido)-5-((4-chlorophenyl)amino)-5-oxopentanoic acid (27).** <sup>1</sup>H NMR (500 MHz, DMSO-*d*<sub>6</sub>) δ 12.30 (s, 2H), 11.62 (d, *J* = 2.2 Hz, 1H), 10.00 (s, 1H), 8.80 (d, *J* = 8.5 Hz, 1H), 8.67 (d, *J* = 7.5 Hz, 1H), 8.15 (d, *J* = 7.7 Hz, 1H), 7.92 – 7.73 (m, 4H), 7.70 (d, *J* = 2.0 Hz, 1H), 7.67 – 7.60 (m, 2H), 7.56 (dd, *J* = 8.6, 1.7 Hz, 1H), 7.42 (pd, *J* = 6.9, 1.6 Hz, 2H), 7.39 – 7.29 (m, 3H), 7.21 (d, *J* = 2.1 Hz, 1H), 7.15 (dd, *J* = 8.7, 2.1 Hz, 1H), 4.91 (ddd, *J* = 11.8, 8.6, 3.6 Hz, 1H), 4.67 (td, *J* = 7.5, 5.8 Hz, 1H), 4.40 (td, *J* = 8.3, 5.1 Hz, 1H), 3.29 (d, *J* = 3.5 Hz, 1H), 3.16 (dd, *J* = 13.9, 11.0 Hz, 1H), 2.80 (dd, *J* = 16.7, 5.8 Hz, 1H), 2.63 (dd, *J* = 16.7, 7.7 Hz, 1H), 2.40 – 2.18 (m, 2H), 2.04 (ddt, *J* = 14.9, 10.7, 5.7 Hz, 1H), 1.88 (ddt, *J* = 13.4, 8.7, 4.6 Hz, 1H). <sup>13</sup>C NMR (126 MHz, DMSO-*d*<sub>6</sub>) δ 174.3, 172.4, 172.1, 171.1, 170.5, 161.1, 138.1, 136.5, 135.2, 133.4, 133.1, 132.2, 129.1, 128.5, 128.3, 127.9, 127.89, 127.86, 127.8, 127.6, 126.4, 125.8, 124.6, 123.9, 121.5, 121.1, 114.3, 103.3, 54.8, 53.4, 50.1, 38.0, 36.4, 30.5, 27.6. HRMS (ESI) Calcd for C<sub>37</sub>H<sub>33</sub>Cl<sub>2</sub>N<sub>5</sub>O<sub>8</sub> (M – H)<sup>-</sup> 744.1628, found 744.1632. HPLC purity 96.3%, *t*<sub>R</sub> = 10.30 min (condition A1); 98.5%, *t*<sub>R</sub> = 12.93 min (condition B1).

**(*S*)-4-((*S*)-3-Carboxy-2-((*S*)-2-(5-chloro-1*H*-indole-2-carboxamido)-3-(naphthalen-2-yl)propanamido)propanamido)-5-((3-chlorophenyl)amino)-5-oxopentanoic acid (28).** <sup>1</sup>H NMR (500 MHz, DMSO-*d*<sub>6</sub>) δ 12.31 (s, 2H), 11.73 – 11.41 (m, 1H), 10.06 (s, 1H), 8.80 (d, *J* =

8.5 Hz, 1H), 8.67 (d,  $J = 7.5$  Hz, 1H), 8.16 (d,  $J = 7.6$  Hz, 1H), 7.93 – 7.73 (m, 5H), 7.70 (d,  $J = 2.1$  Hz, 1H), 7.60 – 7.50 (m, 1H), 7.52 – 7.22 (m, 5H), 7.21 (d,  $J = 2.2$  Hz, 1H), 7.14 (ddd,  $J = 10.7, 8.4, 2.2$  Hz, 2H), 4.91 (ddd,  $J = 11.9, 8.6, 3.8$  Hz, 1H), 4.67 (q,  $J = 7.1$  Hz, 1H), 4.40 (td,  $J = 8.2, 5.2$  Hz, 1H), 3.30 (d,  $J = 3.6$  Hz, 1H), 3.16 (dd,  $J = 13.9, 11.0$  Hz, 1H), 2.80 (dd,  $J = 16.7, 5.8$  Hz, 1H), 2.63 (dd,  $J = 16.6, 7.8$  Hz, 1H), 2.32 (dq,  $J = 16.5, 10.4$  Hz, 2H), 2.04 (ddt,  $J = 15.0, 10.7, 5.8$  Hz, 1H), 1.89 (dtd,  $J = 14.5, 9.1, 5.9$  Hz, 1H).  $^{13}\text{C}$  NMR (126 MHz, DMSO- $d_6$ )  $\delta$  174.2, 172.3, 172.1, 171.2, 170.7, 161.1, 140.5, 136.5, 135.2, 133.5, 133.4, 133.1, 132.2, 130.9, 128.5, 128.3, 127.9, 127.88, 127.76, 126.4, 125.8, 124.6, 123.9, 123.7, 121.1, 119.4, 118.3, 114.3, 103.3, 54.8, 53.4, 50.2, 38.0, 36.4, 30.5, 27.5. HRMS (ESI) Calcd for  $\text{C}_{37}\text{H}_{33}\text{Cl}_2\text{N}_5\text{O}_8$  ( $\text{M} - \text{H}$ ) $^-$  744.1628, found 744.1627. HPLC purity 97.5%,  $t_{\text{R}} = 10.35$  min (condition A1); 99.0%,  $t_{\text{R}} = 12.92$  min (condition B1).

**(S)-4-((S)-3-Carboxy-2-((S)-2-(5-chloro-1H-indole-2-carboxamido)-3-(naphthalen-2-yl)propanamido)propanamido)-5-((2-chlorophenyl)amino)-5-oxopentanoic acid (29).**  $^1\text{H}$  NMR (500 MHz, DMSO- $d_6$ )  $\delta$  12.51 – 12.07 (m, 2H), 11.85 – 11.18 (m, 1H), 9.51 (s, 1H), 8.80 (d,  $J = 8.5$  Hz, 1H), 8.68 (d,  $J = 7.6$  Hz, 1H), 8.20 (d,  $J = 7.7$  Hz, 1H), 8.02 – 7.62 (m, 6H), 7.62 – 7.26 (m, 6H), 7.25 – 6.85 (m, 3H), 4.91 (ddd,  $J = 11.9, 8.4, 3.6$  Hz, 1H), 4.70 (q,  $J = 7.1$  Hz, 1H), 4.54 (td,  $J = 8.2, 4.9$  Hz, 1H), 3.32 – 3.27 (m, 1H), 3.16 (dd,  $J = 13.9, 11.0$  Hz, 1H), 2.81 (dd,  $J = 16.7, 5.7$  Hz, 1H), 2.62 (dd,  $J = 16.7, 7.8$  Hz, 1H), 2.36 (tq,  $J = 16.7, 8.8, 7.1$  Hz, 2H), 2.09 (ddt,  $J = 15.0, 10.5, 5.7$  Hz, 1H), 1.92 (dq,  $J = 13.6, 5.7, 3.1$  Hz, 1H).  $^{13}\text{C}$  NMR (126 MHz, DMSO- $d_6$ )  $\delta$  174.4, 172.2, 172.0, 171.3, 170.6, 161.0, 136.5, 135.2, 134.9, 133.4, 133.1, 132.2, 129.9, 128.5, 128.3, 127.94, 127.90, 127.8, 127.7, 127.1, 127.0, 126.5, 126.4, 125.8, 124.6, 123.9, 121.1, 114.3, 103.3, 54.8, 53.1, 50.1, 38.0, 36.5, 30.5, 27.6. HRMS (ESI) Calcd for  $\text{C}_{37}\text{H}_{33}\text{Cl}_2\text{N}_5\text{O}_8$  ( $\text{M} - \text{H}$ ) $^-$  744.1628, found 744.1632. HPLC purity 96.7%,  $t_{\text{R}} = 9.99$  min (condition A1); 99.2%,  $t_{\text{R}} = 12.46$  min (condition B1).

**tert-Butyl (5S,8S,11S)-8-(2-(tert-butoxy)-2-oxoethyl)-5-isobutyl-3,6,9-trioxo-1-phenyl-11-(phenylcarbamoyl)-2-oxa-4,7,10-triazatetradecan-14-oate (73).** Yield, 84%.  $^1\text{H}$  NMR (500 MHz, DMSO- $d_6$ )  $\delta$  9.84 (s, 1H), 8.32 (d,  $J = 7.9$  Hz, 1H), 7.90 (d,  $J = 7.9$  Hz, 1H), 7.68 – 7.56 (m, 2H), 7.50 (d,  $J = 7.7$  Hz, 1H), 7.40 – 7.23 (m, 7H), 7.12 – 6.93 (m, 1H), 5.02 (q,  $J = 12.6$  Hz, 2H), 4.57 (td,  $J = 7.9, 5.8$  Hz, 1H), 4.38 (td,  $J = 8.3, 5.1$  Hz, 1H), 4.04 (ddd,  $J = 9.3, 7.6, 5.7$  Hz, 1H), 2.73 (dd,  $J = 16.1, 5.8$  Hz, 1H), 2.60 – 2.51 (m, 1H), 2.35 – 2.16 (m, 2H), 2.06 – 1.93 (m, 1H), 1.89 – 1.79 (m, 1H), 1.69 – 1.59 (m, 1H), 1.52 – 1.42 (m, 2H), 0.86 (dd,  $J = 9.6, 6.6$  Hz, 6H).  $^{13}\text{C}$  NMR (126 MHz, DMSO- $d_6$ )  $\delta$  173.0, 171.9, 170.7, 170.1, 169.9, 156.5, 139.1, 137.4, 129.2, 128.8, 128.3, 128.2, 124.0, 119.8, 80.7, 80.2, 65.9, 53.7, 53.2, 50.1, 41.1, 37.4, 31.6, 28.2, 28.1, 27.7, 24.6, 23.4, 22.0. MS (ESI)  $m/z = 719.2$  [ $\text{M} + \text{Na}$ ] $^+$ .

**tert-Butyl (S)-4-((S)-4-(tert-butoxy)-2-((S)-2-(5-chloro-1H-indole-2-carboxamido)-4-methylpentanamido)-4-oxobutanamido)-5-oxo-5-(phenylamino)pentanoate (74).** Yield, 88%.  $^1\text{H}$  NMR (500 MHz, Chloroform- $d$ )  $\delta$  10.97 (s, 1H), 9.00 (s, 1H), 8.65 (s, 1H), 8.54 (s, 1H), 7.66 (d,  $J = 8.0$  Hz, 3H), 7.50 (s, 1H), 7.35 – 7.25 (m, 1H), 7.25 – 7.15 (m, 3H), 7.12 – 6.99 (m, 2H), 5.04 (d,  $J = 39.7$  Hz, 2H), 4.80 (s, 1H), 3.14 – 2.75 (m, 2H), 2.47 (q,  $J = 8.6, 7.9$  Hz, 3H), 2.38 – 2.23 (m, 1H), 1.85 (dtd,  $J = 36.5, 12.4, 11.5, 6.7$  Hz, 3H), 1.47 (s, 9H), 1.21 (s, 9H), 1.02 (dd,  $J = 18.9, 5.9$  Hz, 6H).  $^{13}\text{C}$  NMR (126 MHz, Chloroform- $d$ )  $\delta$  173.4, 172.7, 171.5, 170.4, 169.9, 162.2, 137.7, 135.5, 131.0, 128.7, 128.2, 126.0, 125.0, 124.5, 121.1, 120.6, 113.6, 104.0, 81.8, 81.2, 54.1, 53.2, 50.3, 41.6, 37.0, 32.6, 28.1, 27.8, 27.7, 25.2, 22.6, 22.5. MS (ESI)  $m/z = 762.1$  [ $\text{M} + \text{Na}$ ] $^+$ .

**(S)-4-((S)-3-Carboxy-2-((S)-2-(5-chloro-1H-indole-2-carboxamido)-4-methylpentanamido)propanamido)-5-oxo-5-(phenylamino)pentanoic acid (39).**  $^1\text{H}$  NMR (500 MHz, DMSO- $d_6$ )  $\delta$  12.19 (s, 2H), 11.66 (d,  $J = 2.2$  Hz, 1H), 9.75 (s, 1H), 8.53 (d,  $J = 8.1$  Hz,

1H), 8.40 (d,  $J = 7.6$  Hz, 1H), 7.90 (d,  $J = 7.8$  Hz, 1H), 7.64 (d,  $J = 2.0$  Hz, 1H), 7.60 – 7.50 (m, 2H), 7.37 (d,  $J = 8.8$  Hz, 1H), 7.31 – 7.17 (m, 3H), 7.12 (dd,  $J = 8.7, 2.1$  Hz, 1H), 7.08 – 6.90 (m, 1H), 4.72 – 4.42 (m, 2H), 4.31 (dt,  $J = 8.4, 4.3$  Hz, 1H), 2.71 (dd,  $J = 16.7, 6.2$  Hz, 1H), 2.51 (dd,  $J = 16.7, 7.5$  Hz, 1H), 2.20 (td,  $J = 10.4, 6.0$  Hz, 2H), 2.07 – 1.92 (m, 1H), 1.79 (dt,  $J = 10.1, 5.3$  Hz, 1H), 1.71 – 1.57 (m, 2H), 1.54 – 1.44 (m, 1H), 0.84 (dd,  $J = 13.6, 6.2$  Hz, 6H).  $^{13}\text{C}$  NMR (126 MHz, DMSO- $d_6$ )  $\delta$  174.3, 172.9, 172.4, 171.0, 170.2, 161.2, 139.1, 135.3, 133.2, 129.2, 128.5, 124.7, 124.0 (d,  $J = 3.5$  Hz), 121.1, 119.9, 114.3, 103.6, 53.3, 51.8, 50.0, 40.9, 36.1, 30.5, 27.8, 24.8, 23.5, 21.9. HRMS (ESI) Calcd for  $\text{C}_{30}\text{H}_{34}\text{ClN}_5\text{O}_8$  (M – H) $^-$  626.2018, found 626.2014. HPLC purity 98.3%,  $t_{\text{R}} = 13.38$  min (condition A2); 99.0%,  $t_{\text{R}} = 15.96$  min (condition B2).

**tert-Butyl 2-(((S)-1-(((S)-4-(tert-butoxy)-1-(((S)-5-(tert-butoxy)-1,5-dioxo-1-(phenylamino)pentan-2-yl)amino)-1,4-dioxobutan-2-yl)amino)-3-(3,4-dichlorophenyl)-1-oxopropan-2-yl)carbamoyl)-5-chloro-1H-indole-1-carboxylate (75a).** Yield, 82%.  $^1\text{H}$  NMR (500 MHz, Chloroform- $d$ )  $\delta$  9.52 (s, 1H), 8.44 (s, 2H), 7.89 (d,  $J = 8.9$  Hz, 1H), 7.53 (s, 1H), 7.44 (d,  $J = 8.1$  Hz, 1H), 7.36 – 7.09 (m, 6H), 6.80 (d,  $J = 22.8$  Hz, 4H), 5.58 – 4.98 (m, 3H), 3.36 (td,  $J = 19.5, 16.8, 7.8$  Hz, 2H), 2.89 – 2.70 (m, 2H), 2.58 – 1.93 (m, 4H), 1.51 (s, 9H), 1.41 (s, 9H), 1.29 (s, 9H).  $^{13}\text{C}$  NMR (126 MHz, Chloroform- $d$ )  $\delta$  172.1, 170.6, 170.1, 169.8, 169.2, 162.4, 148.7, 137.7, 136.6, 135.0, 134.7, 132.3, 131.8, 131.0, 130.5, 129.0, 128.9, 128.8, 128.4, 126.3, 123.8, 121.3, 119.3, 116.2, 111.5, 85.2, 81.5, 80.7, 54.2, 53.3, 49.6, 38.8, 38.1, 31.9, 29.1, 28.1, 27.9, 27.8. MS (ESI)  $m/z = 964.3$  [M + Na] $^+$ .

**tert-Butyl 2-(((S)-1-(((S)-4-(tert-butoxy)-1-(((S)-5-(tert-butoxy)-1,5-dioxo-1-(phenylamino)pentan-2-yl)amino)-1,4-dioxobutan-2-yl)amino)-3-(4-chlorophenyl)-1-oxopropan-2-yl)carbamoyl)-5-chloro-1H-indole-1-carboxylate (75b).** Yield, 89%.  $^1\text{H}$  NMR (500 MHz, Chloroform- $d$ )  $\delta$  9.16 (s, 1H), 8.08 (s, 1H), 7.84 (d,  $J = 8.9$  Hz, 1H), 7.40 – 7.04 (m, 10H), 6.96 – 6.78 (m, 3H), 6.68 (s, 1H), 5.28 – 4.76 (m, 3H), 3.27 (dd,  $J = 14.1, 6.3$  Hz, 1H), 3.15 (dd,  $J = 14.0, 6.9$  Hz, 1H), 2.84 – 2.53 (m, 2H), 2.36 (dd,  $J = 9.7, 6.4$  Hz, 2H), 2.28 – 2.17 (m, 1H), 2.09 – 2.05 (m, 1H), 1.47 (s, 9H), 1.30 (s, 9H), 1.23 (s, 9H).  $^{13}\text{C}$  NMR (126 MHz, Chloroform- $d$ )  $\delta$  172.1, 170.6, 170.3, 169.9, 169.1, 162.6, 149.0, 137.9, 135.1, 134.62, 134.59, 133.0, 130.8, 128.99, 128.96, 128.9, 128.5, 126.5, 123.9, 121.3, 119.5, 116.4, 111.4, 85.5, 81.6, 80.7, 54.7, 53.4, 49.9, 38.2, 38.0, 31.9, 28.5, 28.0, 27.94, 27.88. MS (ESI)  $m/z = 930.3$  [M + Na] $^+$ .

**tert-Butyl 2-(((S)-1-(((S)-4-(tert-butoxy)-1-(((S)-5-(tert-butoxy)-1,5-dioxo-1-(phenylamino)pentan-2-yl)amino)-1,4-dioxobutan-2-yl)amino)-3-(2-chlorophenyl)-1-oxopropan-2-yl)carbamoyl)-5-chloro-1H-indole-1-carboxylate (75c).** Yield, 87%.  $^1\text{H}$  NMR (500 MHz, Chloroform- $d$ )  $\delta$  9.17 (s, 1H), 8.16 (s, 1H), 7.86 (d,  $J = 8.9$  Hz, 1H), 7.37 – 7.04 (m, 10H), 6.78 (s, 3H), 6.67 (s, 1H), 5.51 – 4.79 (m, 3H), 3.43 (dd,  $J = 14.2, 6.4$  Hz, 1H), 3.32 (dd,  $J = 14.0, 7.1$  Hz, 1H), 2.88 – 2.61 (m, 2H), 2.36 (s, 2H), 2.19 (t,  $J = 8.1$  Hz, 1H), 2.07 (d,  $J = 6.9$  Hz, 1H), 1.44 (s, 9H), 1.29 (s, 9H), 1.22 (s, 9H).  $^{13}\text{C}$  NMR (126 MHz, Chloroform- $d$ )  $\delta$  172.1, 170.4, 170.3, 169.8, 169.2, 162.6, 149.0, 137.9, 135.1, 134.7, 134.4, 134.2, 131.8, 129.7, 129.0, 128.9, 128.8, 128.4, 127.2, 126.4, 123.8, 121.3, 119.4, 116.4, 111.3, 85.4, 81.4, 80.4, 54.2, 53.2, 50.0, 38.3, 36.1, 31.8, 28.5, 28.0, 27.9, 27.8. MS (ESI)  $m/z = 930.3$  [M + Na] $^+$ .

**tert-Butyl 2-(((S)-1-(((S)-4-(tert-butoxy)-1-(((S)-5-(tert-butoxy)-1,5-dioxo-1-(phenylamino)pentan-2-yl)amino)-1,4-dioxobutan-2-yl)amino)-1-oxo-3-(4-(trifluoromethyl)phenyl)propan-2-yl)carbamoyl)-5-chloro-1H-indole-1-carboxylate (75d).** Yield, 84%.  $^1\text{H}$  NMR (500 MHz, Chloroform- $d$ )  $\delta$  9.51 – 8.25 (m, 2H), 7.79 (d,  $J = 9.0$  Hz, 1H), 7.49 (d,  $J = 8.0$  Hz, 2H), 7.39 (d,  $J = 8.0$  Hz, 2H), 7.25 – 7.02 (m, 6H), 6.71 (d,  $J = 26.1$  Hz, 4H), 5.70 – 4.91 (m, 3H), 3.37 (dd,  $J = 14.2, 5.7$  Hz, 1H), 3.25 (dd,  $J = 14.3, 7.4$  Hz, 1H), 2.73 (dt,  $J = 38.6, 11.1$  Hz, 2H), 2.48 – 2.18 (m, 3H), 2.12 – 2.03 (m, 1H), 1.39 (s, 9H), 1.28 (s, 9H), 1.18 (s,



9H). <sup>13</sup>C NMR (126 MHz, Chloroform-*d*) δ 172.0, 170.8, 170.3, 169.7, 169.3, 162.5, 148.7, 140.6, 137.8, 135.1, 134.7, 130.0, 128.9, 128.8, 128.4, 126.3, 125.5 (d, *J* = 3.6 Hz), 125.3, 123.9, 123.2, 121.3, 119.4, 116.2, 111.5, 85.2, 81.4, 80.7, 54.2, 53.2, 49.6, 38.7, 31.8, 29.0, 28.2, 27.9, 27.8, 27.7. MS (ESI) *m/z* = 964.3 [M + Na]<sup>+</sup>.

***tert*-Butyl 2-(((*S*)-1-(((*S*)-4-(*tert*-butoxy)-1-(((*S*)-5-(*tert*-butoxy)-1,5-dioxo-1-(phenylamino)pentan-2-yl)amino)-1,4-dioxobutan-2-yl)amino)-3-(4-cyanophenyl)-1-oxopropan-2-yl)carbamoyl)-5-chloro-1*H*-indole-1-carboxylate (75e).** Yield, 87%. <sup>1</sup>H NMR (500 MHz, Chloroform-*d*) δ 9.80 – 8.38 (m, 2H), 7.79 – 7.71 (m, 1H), 7.56 (d, *J* = 7.8 Hz, 2H), 7.45 (d, *J* = 7.8 Hz, 2H), 7.25 – 6.87 (m, 5H), 6.79 – 6.37 (m, 5H), 5.21 (s, 3H), 3.51 – 3.24 (m, 2H), 2.94 – 2.63 (m, 2H), 2.50 – 2.24 (m, 3H), 2.17 – 2.11 (m, 1H), 1.39 (s, 9H), 1.33 (s, 9H), 1.17 (dd, *J* = 4.9, 2.5 Hz, 9H). <sup>13</sup>C NMR (126 MHz, Chloroform-*d*) δ 172.1, 170.8, 170.5, 170.1, 169.61, 169.2, 162.5, 148.5, 142.1, 137.7, 134.9, 134.7, 132.4, 130.5, 128.9, 128.7, 128.4, 123.9, 121.3, 119.1, 118.8, 116.1, 111.5, 110.9, 85.1, 81.4, 81.0, 53.8, 53.1, 49.4, 39.2, 31.8, 29.7, 29.3, 28.0, 27.9, 27.8. MS (ESI) *m/z* = 921.3 [M + Na]<sup>+</sup>.

***tert*-Butyl 2-(((*S*)-1-(((*S*)-4-(*tert*-butoxy)-1-(((*S*)-5-(*tert*-butoxy)-1,5-dioxo-1-(phenylamino)pentan-2-yl)amino)-1,4-dioxobutan-2-yl)amino)-3-(4-methoxyphenyl)-1-oxopropan-2-yl)carbamoyl)-5-chloro-1*H*-indole-1-carboxylate (75f).** Yield, 88%. <sup>1</sup>H NMR (500 MHz, Chloroform-*d*) δ 8.57 (s, 1H), 7.81 (d, *J* = 9.0 Hz, 1H), 7.60 (d, *J* = 8.0 Hz, 2H), 7.48 (dd, *J* = 45.3, 4.2 Hz, 3H), 7.26 (dd, *J* = 9.0, 2.1 Hz, 1H), 7.22 – 7.15 (m, 2H), 7.13 – 7.04 (m, 2H), 7.02 – 6.91 (m, 1H), 6.86 – 6.73 (m, 2H), 6.63 (d, *J* = 0.7 Hz, 2H), 4.73 (td, *J* = 7.3, 5.3 Hz, 1H), 4.64 (dd, *J* = 8.1, 5.5 Hz, 1H), 4.48 (td, *J* = 8.6, 3.7 Hz, 1H), 3.70 (s, 3H), 3.25 (dd, *J* = 14.4, 5.4 Hz, 1H), 3.01 (dd, *J* = 14.4, 8.3 Hz, 1H), 2.80 (qd, *J* = 16.5, 6.4 Hz, 2H), 2.33 – 2.13 (m, 3H), 2.04 – 1.85 (m, 1H), 1.54 (s, 9H), 1.33 (s, 9H), 1.23 (s, 9H). <sup>13</sup>C NMR (126 MHz, Chloroform-*d*) δ 172.4, 171.2, 170.6, 170.3, 169.1, 163.2, 159.0, 149.5, 138.2, 134.7, 134.4, 130.1, 129.3, 129.1, 128.7, 127.4, 126.6, 124.0, 121.4, 120.0, 116.6, 114.5, 111.2, 86.2, 81.8, 80.5, 56.1, 55.2, 53.8, 51.1, 36.7, 36.3, 32.0, 28.03, 27.99, 27.95, 26.89. MS (ESI) *m/z* = 926.3 [M + Na]<sup>+</sup>.

**(*S*)-4-(((*S*)-3-Carboxy-2-(((*S*)-2-(5-chloro-1*H*-indole-2-carboxamido)-3-(3,4-dichlorophenyl)propanamido)propanamido)-5-oxo-5-(phenylamino)pentanoic acid (40).** <sup>1</sup>H NMR (500 MHz, DMSO-*d*<sub>6</sub>) δ 12.30 (s, 2H), 11.69 (s, 1H), 9.86 (s, 1H), 8.77 (d, *J* = 8.6 Hz, 1H), 8.62 (d, *J* = 7.6 Hz, 1H), 8.15 (d, *J* = 7.8 Hz, 1H), 7.80 – 7.55 (m, 4H), 7.50 (d, *J* = 8.2 Hz, 1H), 7.42 – 7.25 (m, 4H), 7.24 – 7.12 (m, 2H), 7.06 (t, *J* = 7.4 Hz, 1H), 4.80 (ddd, *J* = 11.9, 8.6, 3.6 Hz, 1H), 4.64 (q, *J* = 7.1 Hz, 1H), 4.41 (td, *J* = 8.2, 4.9 Hz, 1H), 3.13 (dd, *J* = 13.9, 3.5 Hz, 1H), 3.05 – 2.89 (m, 1H), 2.78 (dd, *J* = 16.7, 5.9 Hz, 1H), 2.60 (dd, *J* = 16.7, 7.7 Hz, 1H), 2.31 (pt, *J* = 10.6, 4.5 Hz, 2H), 2.04 (ddt, *J* = 15.2, 10.7, 5.8 Hz, 1H), 1.88 (qd, *J* = 8.8, 4.5 Hz, 1H). <sup>13</sup>C NMR (126 MHz, DMSO-*d*<sub>6</sub>) δ 174.3, 172.3, 171.6, 171.0, 170.2, 161.1, 140.0, 139.1, 135.3, 132.9, 131.7, 131.0, 130.6, 130.1, 129.4, 129.2, 128.5, 124.7, 124.0, 121.1, 119.9, 114.3, 103.3, 54.3, 53.3, 50.1, 36.9, 36.5, 30.6, 27.8. HRMS (ESI) Calcd for C<sub>33</sub>H<sub>30</sub>Cl<sub>3</sub>N<sub>5</sub>O<sub>8</sub> (M – H)<sup>–</sup> 728.1082, 730.1052, found 728.1092, 730.1069. HPLC purity 98.1%, *t*<sub>R</sub> = 14.15 min (condition A2); 99.0%, *t*<sub>R</sub> = 16.80 min (condition B2).

**(*S*)-4-(((*S*)-3-Carboxy-2-(((*S*)-2-(5-chloro-1*H*-indole-2-carboxamido)-3-(4-chlorophenyl)propanamido)propanamido)-5-oxo-5-(phenylamino)pentanoic acid (41).** <sup>1</sup>H NMR (500 MHz, DMSO-*d*<sub>6</sub>) δ 12.30 (s, 2H), 11.96 – 11.32 (m, 1H), 9.85 (s, 1H), 8.75 (d, *J* = 8.6 Hz, 1H), 8.62 (d, *J* = 7.6 Hz, 1H), 8.11 (d, *J* = 7.8 Hz, 1H), 7.71 (d, *J* = 2.1 Hz, 1H), 7.60 (d, *J* = 7.9 Hz, 2H), 7.39 (dd, *J* = 8.5, 5.9 Hz, 3H), 7.29 (d, *J* = 8.0 Hz, 4H), 7.23 – 7.12 (m, 2H), 7.06 (t, *J* = 7.4 Hz, 1H), 4.78 (ddd, *J* = 11.8, 8.6, 3.7 Hz, 1H), 4.64 (q, *J* = 7.1 Hz, 1H), 4.41 (td, *J* = 8.3, 5.0 Hz, 1H), 3.12 (dd, *J* = 13.9, 3.7 Hz, 1H), 2.97 (dd, *J* = 13.8, 11.1 Hz, 1H), 2.78 (dd, *J* = 16.7,

5.9 Hz, 1H), 2.60 (dd,  $J = 16.7, 7.7$  Hz, 1H), 2.30 (pd,  $J = 16.5, 7.4$  Hz, 2H), 2.04 (td,  $J = 9.1, 4.9$  Hz, 1H), 1.87 (dtd,  $J = 14.5, 9.3, 5.9$  Hz, 1H).  $^{13}\text{C}$  NMR (126 MHz, DMSO- $d_6$ )  $\delta$  174.3, 172.3, 171.9, 171.0, 170.2, 161.0, 139.1, 137.8, 135.3, 133.0, 131.5, 131.4, 129.2, 128.5, 128.4, 124.7, 123.99, 123.98, 121.1, 119.9, 114.3, 103.3, 54.6, 53.3, 50.1, 37.1, 36.4, 30.5, 27.8. HRMS (ESI) Calcd for  $\text{C}_{33}\text{H}_{31}\text{Cl}_2\text{N}_5\text{O}_8$  ( $\text{M} - \text{H}$ ) $^-$  694.1471, found 694.1470. HPLC purity 98.5%,  $t_{\text{R}} = 13.80$  min (condition A2); 99.7%,  $t_{\text{R}} = 16.35$  min (condition B2).

**(S)-4-((S)-3-Carboxy-2-((S)-2-(5-chloro-1H-indole-2-carboxamido)-3-(2-chlorophenyl)propanamido)propanamido)-5-oxo-5-(phenylamino)pentanoic acid (42).**  $^1\text{H}$  NMR (500 MHz, DMSO- $d_6$ )  $\delta$  12.26 (s, 2H), 11.68 (s, 1H), 9.83 (s, 1H), 8.78 (d,  $J = 8.5$  Hz, 1H), 8.47 (d,  $J = 7.6$  Hz, 1H), 8.08 (d,  $J = 7.8$  Hz, 1H), 7.71 (s, 1H), 7.60 (d,  $J = 8.0$  Hz, 2H), 7.49 – 7.36 (m, 3H), 7.30 (t,  $J = 7.7$  Hz, 2H), 7.24 – 7.14 (m, 4H), 7.06 (t,  $J = 7.4$  Hz, 1H), 4.90 (td,  $J = 9.6, 4.2$  Hz, 1H), 4.64 (q,  $J = 7.0$  Hz, 1H), 4.39 (td,  $J = 8.1, 4.9$  Hz, 1H), 3.32 (m, 1H), 3.13 (dd,  $J = 14.4, 10.6$  Hz, 1H), 2.78 (dd,  $J = 16.7, 5.9$  Hz, 1H), 2.62 (dd,  $J = 16.6, 7.3$  Hz, 1H), 2.30 (tq,  $J = 16.5, 6.7, 5.4$  Hz, 2H), 2.03 (ddq,  $J = 17.0, 11.9, 5.9$  Hz, 1H), 1.87 (dq,  $J = 8.7, 4.5, 3.6$  Hz, 1H).  $^{13}\text{C}$  NMR (126 MHz, DMSO- $d_6$ )  $\delta$  174.3, 172.4, 171.5, 170.9, 170.2, 161.1, 139.1, 135.9, 135.3, 133.9, 133.0, 131.8, 129.5, 129.2, 128.7, 128.5, 127.3, 124.7, 124.01, 123.97, 121.1, 119.9, 114.3, 103.4, 53.4, 52.7, 50.2, 36.3, 35.3, 30.6, 27.7. HRMS (ESI) Calcd for  $\text{C}_{33}\text{H}_{31}\text{Cl}_2\text{N}_5\text{O}_8$  ( $\text{M} - \text{H}$ ) $^-$  694.1471, found 694.1477. HPLC purity 96.4%,  $t_{\text{R}} = 13.66$  min (condition A2); 97.6%,  $t_{\text{R}} = 16.11$  min (condition B2).

**(S)-4-((S)-3-Carboxy-2-((S)-2-(5-chloro-1H-indole-2-carboxamido)-3-(4-(trifluoromethyl)phenyl)propanamido)propanamido)-5-oxo-5-(phenylamino)pentanoic acid (43).**  $^1\text{H}$  NMR (500 MHz, DMSO- $d_6$ )  $\delta$  12.27 (s, 2H), 11.67 (d,  $J = 2.2$  Hz, 1H), 9.86 (s, 1H), 8.80 (d,  $J = 8.6$  Hz, 1H), 8.66 (d,  $J = 7.6$  Hz, 1H), 8.13 (d,  $J = 7.8$  Hz, 1H), 7.71 (d,  $J = 2.0$  Hz, 1H), 7.60 (q,  $J = 8.3$  Hz, 6H), 7.39 (d,  $J = 8.7$  Hz, 1H), 7.30 (t,  $J = 7.9$  Hz, 2H), 7.21 (d,  $J = 2.1$  Hz, 1H), 7.17 (dd,  $J = 8.7, 2.1$  Hz, 1H), 7.06 (t,  $J = 7.4$  Hz, 1H), 4.85 (ddd,  $J = 11.9, 8.6, 3.6$  Hz, 1H), 4.66 (td,  $J = 7.5, 5.9$  Hz, 1H), 4.42 (td,  $J = 8.3, 5.0$  Hz, 1H), 3.22 (dd,  $J = 13.8, 3.6$  Hz, 1H), 3.08 (dd,  $J = 13.8, 11.1$  Hz, 1H), 2.79 (dd,  $J = 16.7, 5.9$  Hz, 1H), 2.61 (dd,  $J = 16.7, 7.6$  Hz, 1H), 2.39 – 2.22 (m, 2H), 2.08 – 1.98 (m, 1H), 1.90 – 1.80 (m, 1H).  $^{13}\text{C}$  NMR (126 MHz, DMSO- $d_6$ )  $\delta$  174.3, 172.3, 171.7, 171.0, 170.2, 161.1, 143.7, 139.1, 135.3, 133.0, 130.4, 129.2, 128.5, 127.5 (d,  $J = 31.7$  Hz), 125.3 (d,  $J = 4.2$  Hz), 124.8 (d,  $J = 270.0$  Hz), 124.7, 124.0, 121.1, 119.9, 114.3, 103.4, 54.3, 53.3, 50.2, 37.5, 36.4, 30.5, 27.8. HRMS (ESI) Calcd for  $\text{C}_{34}\text{H}_{31}\text{ClF}_3\text{N}_5\text{O}_8$  ( $\text{M} - \text{H}$ ) $^-$  728.1735, found 728.1733. HPLC purity 95.3%,  $t_{\text{R}} = 14.00$  min (condition A2); 95.1%,  $t_{\text{R}} = 16.44$  min (condition B2).

**(S)-4-((S)-3-Carboxy-2-((S)-2-(5-chloro-1H-indole-2-carboxamido)-3-(4-cyanophenyl)propanamido)propanamido)-5-oxo-5-(phenylamino)pentanoic acid (44).**  $^1\text{H}$  NMR (500 MHz, DMSO- $d_6$ )  $\delta$  12.28 (s, 2H), 11.67 (d,  $J = 2.2$  Hz, 1H), 9.85 (s, 1H), 8.80 (d,  $J = 8.7$  Hz, 1H), 8.64 (d,  $J = 7.5$  Hz, 1H), 8.13 (d,  $J = 7.8$  Hz, 1H), 7.83 – 7.66 (m, 3H), 7.58 (ddd,  $J = 18.4, 7.5, 1.6$  Hz, 4H), 7.39 (d,  $J = 8.7$  Hz, 1H), 7.30 (dd,  $J = 8.5, 7.4$  Hz, 2H), 7.23 – 7.14 (m, 2H), 7.06 (dd,  $J = 8.1, 6.7$  Hz, 1H), 4.84 (ddd,  $J = 12.0, 8.8, 3.6$  Hz, 1H), 4.65 (td,  $J = 7.6, 5.9$  Hz, 1H), 4.41 (td,  $J = 8.3, 5.1$  Hz, 1H), 3.21 (dd,  $J = 13.8, 3.6$  Hz, 1H), 3.07 (dd,  $J = 13.7, 11.1$  Hz, 1H), 2.79 (dd,  $J = 16.7, 5.9$  Hz, 1H), 2.61 (dd,  $J = 16.7, 7.7$  Hz, 1H), 2.31 (dq,  $J = 16.6, 10.5$  Hz, 2H), 2.04 (td,  $J = 9.0, 5.0$  Hz, 1H), 1.88 (ddt,  $J = 13.5, 8.7, 4.7$  Hz, 1H).  $^{13}\text{C}$  NMR (126 MHz, DMSO- $d_6$ )  $\delta$  174.3, 172.3, 171.6, 171.0, 170.2, 161.1, 144.8, 139.1, 135.3, 132.9, 132.4, 130.7, 129.2, 128.5, 124.7, 124.0, 121.1, 119.9, 119.4, 114.3, 109.7, 103.4, 54.2, 53.3, 50.2, 37.8, 36.4, 30.5, 27.8. HRMS (ESI) Calcd for  $\text{C}_{34}\text{H}_{31}\text{ClN}_6\text{O}_8$  ( $\text{M} - \text{H}$ ) $^-$  685.1814, found 685.1812. HPLC purity 97.1%,  $t_{\text{R}} = 13.02$  min (condition A2); 96.7%,  $t_{\text{R}} = 15.12$  min (condition B2).

**(S)-4-((S)-3-Carboxy-2-((S)-2-(5-chloro-1H-indole-2-carboxamido)-3-(4-methoxyphenyl)propanamido)propanamido)-5-oxo-5-(phenylamino)pentanoic acid (45).** <sup>1</sup>H NMR (500 MHz, DMSO-*d*<sub>6</sub>) δ 12.27 (s, 2H), 11.66 (s, 1H), 9.84 (s, 1H), 8.69 (d, *J* = 8.4 Hz, 1H), 8.58 (d, *J* = 7.6 Hz, 1H), 8.07 (d, *J* = 7.8 Hz, 1H), 7.79 – 7.65 (m, 1H), 7.60 (d, *J* = 8.0 Hz, 2H), 7.40 (d, *J* = 8.7 Hz, 1H), 7.34 – 7.23 (m, 4H), 7.22 – 7.11 (m, 2H), 7.06 (t, *J* = 7.4 Hz, 1H), 6.79 (d, *J* = 8.2 Hz, 2H), 4.72 (ddd, *J* = 11.8, 8.3, 3.6 Hz, 1H), 4.64 (q, *J* = 7.1 Hz, 1H), 4.41 (td, *J* = 8.3, 5.1 Hz, 1H), 3.66 (s, 3H), 3.06 (dd, *J* = 13.9, 3.7 Hz, 1H), 2.92 (dd, *J* = 14.0, 10.9 Hz, 1H), 2.78 (dd, *J* = 16.6, 6.1 Hz, 1H), 2.60 (dd, *J* = 16.7, 7.5 Hz, 1H), 2.30 (td, *J* = 10.0, 6.1 Hz, 2H), 2.04 (td, *J* = 9.2, 5.1 Hz, 1H), 1.87 (dt, *J* = 15.0, 4.8 Hz, 1H). <sup>13</sup>C NMR (126 MHz, DMSO-*d*<sub>6</sub>) δ 174.3, 172.4, 172.2, 171.0, 170.2, 161.0, 158.2, 139.1, 135.3, 133.2, 130.6, 130.5, 129.2, 128.5, 124.6, 124.0, 123.9, 121.1, 119.9, 114.3, 113.9, 103.3, 55.3, 55.1, 53.3, 50.1, 36.9, 36.4, 30.5, 27.8. HRMS (ESI) Calcd for C<sub>34</sub>H<sub>34</sub>ClN<sub>5</sub>O<sub>9</sub> (M – H)<sup>-</sup> 690.1967, found 690.1963. HPLC purity 99.3%, t<sub>R</sub> = 13.27 min (condition A2); 98.3%, t<sub>R</sub> = 15.62 min (condition B2).

**tert-Butyl (5S,8S,11S)-8-(2-(tert-butoxy)-2-oxoethyl)-5-(naphthalen-1-ylmethyl)-3,6,9-trioxo-1-phenyl-11-(phenylcarbamoyl)-2-oxa-4,7,10-triazatetradecan-14-oate (76).** Yield, 79%. <sup>1</sup>H NMR (500 MHz, Chloroform-*d*) δ 8.71 (s, 1H), 8.01 (d, *J* = 8.2 Hz, 1H), 7.89 – 7.79 (m, 1H), 7.77 – 7.66 (m, 2H), 7.64 – 7.51 (m, 3H), 7.39 – 7.26 (m, 2H), 7.25 – 7.05 (m, 9H), 7.02 – 6.84 (m, 1H), 6.10 – 5.65 (m, 1H), 4.87 (s, 2H), 4.67 (dt, *J* = 21.2, 5.7 Hz, 2H), 4.50 (td, *J* = 8.9, 8.4, 4.2 Hz, 1H), 3.63 (dd, *J* = 14.4, 4.8 Hz, 1H), 3.26 (dd, *J* = 14.4, 9.1 Hz, 1H), 2.74 (dd, *J* = 17.3, 4.6 Hz, 1H), 2.56 – 2.39 (m, 1H), 2.17 (dt, *J* = 12.9, 6.6 Hz, 3H), 1.88 (d, *J* = 17.7 Hz, 1H), 1.25 (d, *J* = 6.9 Hz, 18H). <sup>13</sup>C NMR (126 MHz, Chloroform-*d*) δ 172.3, 172.2, 170.9, 170.7, 169.4, 156.8, 138.2, 135.8, 134.0, 132.2, 131.9, 129.0, 128.8, 128.5, 128.3, 128.2, 127.7, 126.6, 125.9, 125.4, 124.2, 123.4, 120.2, 82.1, 80.5, 67.4, 56.4, 53.7, 50.3, 36.7, 35.4, 31.9, 28.1, 28.0, 27.1. MS (ESI) m/z = 803.3 [M + Na]<sup>+</sup>.

**tert-Butyl (S)-4-((S)-4-(tert-butoxy)-2-((S)-2-(5-chloro-1H-indole-2-carboxamido)-3-(naphthalen-1-yl)propanamido)-4-oxobutanamido)-5-oxo-5-(phenylamino)pentanoate (77).** Yield, 83%. <sup>1</sup>H NMR (500 MHz, Chloroform-*d*) δ 10.70 (s, 1H), 8.70 (s, 1H), 8.25 (s, 1H), 8.09 (d, *J* = 7.3 Hz, 1H), 7.90 – 7.77 (m, 1H), 7.56 (dd, *J* = 27.2, 8.7 Hz, 4H), 7.48 – 7.40 (m, 1H), 7.30 – 7.05 (m, 9H), 6.97 (t, *J* = 7.4 Hz, 1H), 6.64 (s, 1H), 5.06 – 4.90 (m, 1H), 4.80 – 4.66 (m, 1H), 4.47 (dt, *J* = 9.1, 5.0 Hz, 1H), 3.68 (dd, *J* = 14.5, 5.9 Hz, 1H), 3.30 (dd, *J* = 14.2, 8.6 Hz, 1H), 2.77 – 2.54 (m, 2H), 2.35 (ddt, *J* = 17.3, 13.7, 4.7 Hz, 3H), 2.16 (d, *J* = 8.6 Hz, 1H), 1.34 (s, 9H), 1.08 (s, 9H). <sup>13</sup>C NMR (126 MHz, Chloroform-*d*) δ 173.8, 171.9, 171.0, 170.7, 169.4, 162.3, 137.8, 135.6, 133.9, 132.1, 131.7, 130.6, 128.9, 128.8, 128.3, 128.1, 127.5, 126.5, 126.0, 125.8, 125.23, 125.16, 124.4, 123.0, 121.0, 120.4, 113.7, 103.0, 82.2, 81.4, 55.2, 54.4, 50.3, 36.9, 35.0, 32.6, 28.1, 27.8, 27.5. MS (ESI) m/z = 846.4 [M + Na]<sup>+</sup>.

**(S)-4-((S)-3-Carboxy-2-((S)-2-(5-chloro-1H-indole-2-carboxamido)-3-(naphthalen-1-yl)propanamido)propanamido)-5-oxo-5-(phenylamino)pentanoic acid (46).** <sup>1</sup>H NMR (500 MHz, DMSO-*d*<sub>6</sub>) δ 12.27 (s, 2H), 11.62 (d, *J* = 2.2 Hz, 1H), 9.86 (s, 1H), 8.83 (d, *J* = 8.4 Hz, 1H), 8.67 (d, *J* = 7.5 Hz, 1H), 8.32 (d, *J* = 8.5 Hz, 1H), 8.09 (d, *J* = 7.8 Hz, 1H), 7.89 (dd, *J* = 8.3, 1.4 Hz, 1H), 7.74 (d, *J* = 8.2 Hz, 1H), 7.70 (d, *J* = 2.0 Hz, 1H), 7.64 – 7.47 (m, 5H), 7.42 – 7.33 (m, 2H), 7.33 – 7.27 (m, 2H), 7.23 – 7.18 (m, 1H), 7.16 (dd, *J* = 8.7, 2.1 Hz, 1H), 7.11 – 7.02 (m, 1H), 4.96 (ddd, *J* = 10.7, 8.4, 3.9 Hz, 1H), 4.69 (td, *J* = 7.5, 5.9 Hz, 1H), 4.43 (td, *J* = 8.3, 5.1 Hz, 1H), 3.70 (dd, *J* = 14.4, 3.8 Hz, 1H), 3.42 (dd, *J* = 14.5, 10.6 Hz, 1H), 2.82 (dd, *J* = 16.7, 5.9 Hz, 1H), 2.65 (dd, *J* = 16.7, 7.6 Hz, 1H), 2.40 – 2.24 (m, 2H), 2.16 – 2.01 (m, 1H), 1.91 (ddt, *J* = 13.7, 8.7, 4.7 Hz, 1H). <sup>13</sup>C NMR (126 MHz, DMSO-*d*<sub>6</sub>) δ 174.3, 172.4, 172.0, 171.0, 170.3, 161.1, 139.1, 135.2, 134.3, 133.8, 133.0, 132.1, 129.2, 129.0, 128.5, 127.7, 127.5, 126.6, 126.0, 125.8, 124.7,

124.3, 123.99, 123.96, 121.1, 119.9, 114.3, 103.4, 53.8, 53.3, 50.3, 36.3, 34.9, 30.6, 27.8. HRMS (ESI) Calcd for C<sub>37</sub>H<sub>34</sub>ClN<sub>5</sub>O<sub>8</sub> (M - H)<sup>-</sup> 710.2018, found 710.2016. HPLC purity 96.0%, t<sub>R</sub> = 14.00 min (condition A2); 95.6%, t<sub>R</sub> = 16.66 min (condition B2).

**tert-Butyl (R)-4-(((benzyloxy)carbonyl)amino)-5-((3-methoxyphenyl)amino)-5-oxopentanoate (78).** <sup>1</sup>H NMR (500 MHz, Chloroform-*d*) δ 8.70 (s, 1H), 7.34 – 7.12 (m, 6H), 7.06 (t, *J* = 8.2 Hz, 1H), 6.90 – 6.70 (m, 1H), 6.55 (dd, *J* = 8.3, 2.4 Hz, 1H), 5.95 (d, *J* = 8.0 Hz, 1H), 5.00 (q, *J* = 12.3 Hz, 2H), 4.33 (q, *J* = 7.3 Hz, 1H), 3.65 (s, 3H), 2.37 (td, *J* = 9.3, 4.8 Hz, 1H), 2.28 (dt, *J* = 16.6, 6.9 Hz, 1H), 2.12 – 2.03 (m, 1H), 2.01 – 1.85 (m, 1H), 1.35 (s, 9H). <sup>13</sup>C NMR (126 MHz, Chloroform-*d*) δ 172.9, 169.9, 160.1, 156.6, 138.9, 136.1, 129.6, 128.5, 128.2, 128.0, 112.1, 110.5, 105.5, 81.2, 67.2, 55.2, 31.8, 28.1. MS (ESI) *m/z* = 443.2 [M + H]<sup>+</sup>, MS (ESI) *m/z* = 465.3 [M + Na]<sup>+</sup>.

**tert-Butyl (R)-4-((S)-2-(((benzyloxy)carbonyl)amino)-4-(tert-butoxy)-4-oxobutanamido)-5-((3-methoxyphenyl)amino)-5-oxopentanoate (79a).** <sup>1</sup>H NMR (500 MHz, Chloroform-*d*) δ 8.65 (s, 1H), 7.78 (d, *J* = 7.5 Hz, 1H), 7.50 – 7.27 (m, 6H), 7.24 – 6.97 (m, 2H), 6.63 (ddd, *J* = 8.1, 2.5, 1.1 Hz, 1H), 5.89 (d, *J* = 8.7 Hz, 1H), 5.19 – 5.01 (m, 2H), 4.64 – 4.33 (m, 2H), 3.76 (s, 3H), 3.05 (dd, *J* = 17.3, 5.0 Hz, 1H), 2.69 (dd, *J* = 17.3, 5.2 Hz, 1H), 2.54 – 2.42 (m, 1H), 2.36 (dt, *J* = 17.2, 6.5 Hz, 1H), 2.26 – 2.13 (m, 1H), 2.12 – 2.04 (m, 1H), 1.42 (s, 9H), 1.36 (s, 9H). <sup>13</sup>C NMR (126 MHz, Chloroform-*d*) δ 173.6, 171.3, 171.2, 169.0, 160.0, 156.2, 139.0, 135.9, 129.3, 128.6, 128.3, 128.2, 112.5, 110.3, 105.9, 82.2, 81.2, 67.5, 55.3, 53.8, 51.6, 37.4, 31.9, 28.0, 28.0, 26.6. MS (ESI) *m/z* = 614.4 [M + H]<sup>+</sup>, MS (ESI) *m/z* = 636.3 [M + Na]<sup>+</sup>.

**tert-Butyl (S)-4-((R)-2-(((benzyloxy)carbonyl)amino)-4-(tert-butoxy)-4-oxobutanamido)-5-((3-methoxyphenyl)amino)-5-oxopentanoate (79b).** <sup>1</sup>H NMR (500 MHz, Chloroform-*d*) δ 8.60 (s, 1H), 7.79 (d, *J* = 7.3 Hz, 1H), 7.47 – 7.30 (m, 6H), 7.17 (t, *J* = 8.1 Hz, 1H), 7.10 (d, *J* = 8.0 Hz, 1H), 6.64 (ddd, *J* = 8.1, 2.5, 1.0 Hz, 1H), 5.80 (d, *J* = 8.9 Hz, 1H), 5.19 (d, *J* = 12.1 Hz, 1H), 5.12 (d, *J* = 12.2 Hz, 1H), 4.56 (ddd, *J* = 12.5, 8.4, 4.6 Hz, 2H), 3.79 (s, 3H), 3.10 (dd, *J* = 17.4, 4.8 Hz, 1H), 2.69 (dd, *J* = 17.4, 5.0 Hz, 1H), 2.56 – 2.41 (m, 1H), 2.38 (ddd, *J* = 17.1, 7.2, 5.2 Hz, 1H), 2.28 – 2.13 (m, 1H), 2.09 (dd, *J* = 14.3, 7.0 Hz, 1H), 1.44 (s, 9H), 1.37 (s, 9H). <sup>13</sup>C NMR (126 MHz, Chloroform-*d*) δ 173.8, 171.4, 171.2, 169.0, 160.0, 156.1, 138.9, 135.8, 129.3, 128.6, 128.4, 128.2, 112.5, 110.3, 105.9, 82.3, 81.3, 67.6, 55.3, 53.9, 51.6, 37.4, 32.0, 28.04, 27.97, 26.5. MS (ESI) *m/z* = 614.4 [M + H]<sup>+</sup>, MS (ESI) *m/z* = 636.3 [M + Na]<sup>+</sup>.

**tert-Butyl (5S,8S,11R)-8-(2-(tert-butoxy)-2-oxoethyl)-11-((3-methoxyphenyl)carbamoyl)-5-(naphthalen-2-ylmethyl)-3,6,9-trioxo-1-phenyl-2-oxa-4,7,10-triazatetradecan-14-oate (80a).** <sup>1</sup>H NMR (500 MHz, Chloroform-*d*) δ 8.64 (s, 1H), 7.84 (s, 1H), 7.57 – 7.34 (m, 5H), 7.13 (dq, *J* = 13.1, 7.1, 6.1 Hz, 8H), 7.03 (d, *J* = 7.0 Hz, 2H), 6.91 – 6.79 (m, 1H), 6.79 – 6.69 (m, 1H), 6.45 (dd, *J* = 8.2, 2.4 Hz, 1H), 5.23 – 4.60 (m, 5H), 3.51 (d, *J* = 7.1 Hz, 3H), 3.17 (dd, *J* = 14.0, 4.6 Hz, 1H), 3.10 – 2.89 (m, 2H), 2.75 (s, 1H), 2.19 (dt, *J* = 56.9, 7.5 Hz, 3H), 1.92 (d, *J* = 5.4 Hz, 1H), 1.32 (s, 9H), 1.27 (d, *J* = 11.9 Hz, 9H). <sup>13</sup>C NMR (126 MHz, Chloroform-*d*) δ 172.2, 171.3, 170.8, 169.3, 159.9, 156.8, 139.1, 135.8, 133.6, 133.3, 132.4, 129.3, 128.5, 128.1, 127.8, 127.6, 127.4, 127.1, 126.1, 125.6, 112.1, 109.9, 105.5, 81.8, 80.5, 67.2, 56.3, 55.1, 53.5, 53.3, 49.5, 39.5, 38.2, 31.7, 28.1, 28.0. MS (ESI) *m/z* = 811.4 [M + H]<sup>+</sup>, MS (ESI) *m/z* = 833.4 [M + Na]<sup>+</sup>.

**tert-Butyl (5S,8R,11S)-8-(2-(tert-butoxy)-2-oxoethyl)-11-((3-methoxyphenyl)carbamoyl)-5-(naphthalen-2-ylmethyl)-3,6,9-trioxo-1-phenyl-2-oxa-4,7,10-triazatetradecan-14-oate (80b).** <sup>1</sup>H NMR (500 MHz, Chloroform-*d*) δ 8.54 (s, 1H), 7.84 – 7.69 (m, 4H), 7.62 (d, *J* = 1.7 Hz, 1H), 7.55 – 7.45 (m, 2H), 7.43 (t, *J* = 2.2 Hz, 1H), 7.38 – 7.20 (m, 6H), 7.19 – 6.98 (m, 2H), 6.94 (d, *J* = 9.1 Hz, 1H), 6.63 (ddd, *J* = 8.1, 2.5, 1.1 Hz, 1H), 5.67 (d, *J* = 5.7 Hz, 1H), 5.09 (d, *J* = 12.2 Hz, 1H), 4.99 (d, *J* = 12.2 Hz, 1H), 4.76 (dt, *J* = 9.2, 4.6 Hz, 1H), 4.56 (ddd, *J* = 8.5, 6.6, 3.5 Hz, 1H),

4.31 (q,  $J = 7.1$  Hz, 1H), 3.75 (s, 3H), 3.32 (dd,  $J = 13.5, 7.8$  Hz, 1H), 3.19 (dd,  $J = 13.4, 7.3$  Hz, 1H), 2.99 (dd,  $J = 17.4, 4.2$  Hz, 1H), 2.51 – 2.25 (m, 3H), 2.22 – 2.10 (m, 1H), 2.10 – 1.93 (m, 1H), 1.41 (s, 9H), 1.25 (s, 9H).  $^{13}\text{C}$  NMR (126 MHz, Chloroform-*d*)  $\delta$  172.6, 171.5, 171.2, 171.0, 169.2, 160.0, 156.6, 139.2, 135.7, 133.4, 132.4, 129.3, 128.5 (d,  $J = 2.0$  Hz), 128.2, 128.1, 128.0, 127.7, 127.6, 127.0, 126.4, 126.0, 112.5, 110.1, 105.9, 82.1, 80.7, 67.5, 57.8, 55.2, 53.8, 49.0, 37.5, 36.4, 32.0, 28.1, 27.8, 26.3. MS (ESI)  $m/z = 811.4$   $[\text{M} + \text{H}]^+$ , MS (ESI)  $m/z = 833.4$   $[\text{M} + \text{Na}]^+$ .

***tert*-Butyl (5*R*,8*S*,11*S*)-8-(2-(*tert*-butoxy)-2-oxoethyl)-11-((3-methoxyphenyl)carbamoyl)-5-(naphthalen-2-ylmethyl)-3,6,9-trioxo-1-phenyl-2-oxa-4,7,10-triazatetradecan-14-oate (80c).**

$^1\text{H}$  NMR (500 MHz, Chloroform-*d*)  $\delta$  8.53 (s, 1H), 7.87 – 7.72 (m, 4H), 7.64 (d,  $J = 1.6$  Hz, 1H), 7.48 (qt,  $J = 7.1, 3.3$  Hz, 3H), 7.39 – 7.21 (m, 5H), 7.21 – 7.03 (m, 4H), 6.85 – 6.45 (m, 1H), 5.73 (d,  $J = 5.8$  Hz, 1H), 4.99 (d,  $J = 12.0$  Hz, 1H), 4.76 (d,  $J = 12.1$  Hz, 1H), 4.70 (dt,  $J = 8.1, 5.0$  Hz, 1H), 4.67 – 4.56 (m, 1H), 4.44 (d,  $J = 6.8$  Hz, 1H), 3.77 (s, 3H), 3.32 (dd,  $J = 13.5, 7.3$  Hz, 1H), 3.20 (dd,  $J = 13.6, 7.7$  Hz, 1H), 2.90 (dd,  $J = 17.1, 4.3$  Hz, 1H), 2.40 – 2.29 (m, 3H), 2.24 – 2.17 (m, 1H), 2.09 – 1.97 (m, 1H), 1.42 (s, 9H), 1.37 (s, 9H).  $^{13}\text{C}$  NMR (126 MHz, Chloroform-*d*)  $\delta$  172.6, 172.2, 170.9, 170.5, 169.2, 160.0, 156.7, 139.3, 135.6, 133.4, 132.5, 129.5, 128.5, 128.4, 128.3, 128.2, 128.1, 127.7, 127.5, 127.0, 126.4, 125.9, 112.0, 110.3, 105.3, 82.1, 80.6, 67.5, 57.4, 55.2, 53.6, 50.2, 37.8, 35.7, 32.0, 28.1, 27.9, 26.8. MS (ESI)  $m/z = 833.4$   $[\text{M} + \text{Na}]^+$ .

***tert*-Butyl (R)-4-((S)-4-(*tert*-butoxy)-2-((S)-2-(5-chloro-1*H*-indole-2-carboxamido)-3-(naphthalen-2-yl)propanamido)-4-oxobutanamido)-5-((3-methoxyphenyl)amino)-5-oxopentanoate (81a).**

$^1\text{H}$  NMR (500 MHz, Chloroform-*d*)  $\delta$  10.18 (s, 1H), 8.61 (s, 1H), 7.96 (s, 1H), 7.71 – 7.47 (m, 4H), 7.42 (d,  $J = 1.9$  Hz, 1H), 7.30 – 7.10 (m, 5H), 7.07 (dd,  $J = 8.7, 2.0$  Hz, 3H), 6.88 (d,  $J = 8.2$  Hz, 2H), 6.62 (s, 1H), 6.40 (dt,  $J = 7.3, 2.2$  Hz, 1H), 4.75 (d,  $J = 126.2$  Hz, 3H), 3.46 (s, 3H), 3.34 (dd,  $J = 14.1, 4.9$  Hz, 1H), 3.20 (dd,  $J = 13.5, 8.1$  Hz, 1H), 2.95 (dd,  $J = 17.2, 5.8$  Hz, 1H), 2.71 (d,  $J = 16.9$  Hz, 1H), 2.31 (dt,  $J = 44.6, 6.9$  Hz, 3H), 2.13 – 1.99 (m, 1H), 1.34 (s, 9H), 1.13 (s, 9H).  $^{13}\text{C}$  NMR (126 MHz, Chloroform-*d*)  $\delta$  173.0, 171.1, 170.7, 169.8, 162.4, 159.8, 138.8, 135.3, 133.4, 132.4, 130.4, 129.3, 128.7, 128.2, 127.9, 127.6, 127.3, 126.9, 126.4, 126.2, 125.9, 125.3, 121.0, 113.5, 112.1, 109.9, 105.8, 103.2, 81.9, 81.0, 69.5, 55.7, 55.0, 53.8, 53.6, 49.8, 32.1, 29.3, 28.1, 27.8. MS (ESI)  $m/z = 876.4$   $[\text{M} + \text{Na}]^+$ .

***tert*-Butyl (S)-4-((R)-4-(*tert*-butoxy)-2-((S)-2-(5-chloro-1*H*-indole-2-carboxamido)-3-(naphthalen-2-yl)propanamido)-4-oxobutanamido)-5-((3-methoxyphenyl)amino)-5-oxopentanoate (81b).**

$^1\text{H}$  NMR (500 MHz, Chloroform-*d*)  $\delta$  10.03 (d,  $J = 2.1$  Hz, 1H), 8.41 (s, 1H), 8.02 (d,  $J = 6.4$  Hz, 1H), 7.84 (d,  $J = 4.9$  Hz, 1H), 7.77 – 7.67 (m, 3H), 7.67 – 7.55 (m, 1H), 7.50 – 7.35 (m, 4H), 7.34 – 7.24 (m, 2H), 7.09 (dd,  $J = 8.8, 2.0$  Hz, 1H), 6.99 (t,  $J = 8.1$  Hz, 1H), 6.91 (ddd,  $J = 8.1, 1.9, 1.0$  Hz, 1H), 6.75 (s, 1H), 6.64 (d,  $J = 9.9$  Hz, 1H), 6.49 (ddd,  $J = 8.2, 2.5, 1.0$  Hz, 1H), 4.80 (dt,  $J = 9.9, 4.0$  Hz, 1H), 4.35 – 4.26 (m, 2H), 3.64 (s, 3H), 3.50 – 3.28 (m, 2H), 2.98 (dd,  $J = 17.7, 3.8$  Hz, 1H), 2.50 – 2.36 (m, 1H), 2.35 – 2.15 (m, 2H), 1.87 – 1.68 (m, 2H), 1.36 (s, 9H), 0.96 (s, 9H).  $^{13}\text{C}$  NMR (126 MHz, Chloroform-*d*)  $\delta$  173.9, 171.6, 171.5, 171.4, 169.1, 162.5, 159.9, 139.0, 135.5, 133.4, 133.1, 132.5, 130.4, 129.1, 128.6, 128.1, 128.0, 127.8, 127.5, 126.9, 126.7, 126.2, 125.9, 124.9, 120.9, 113.9, 112.6, 110.1, 106.0, 103.4, 82.2, 80.9, 58.6, 55.2, 54.4, 48.4, 37.1, 36.3, 32.2, 28.1, 27.5, 26.6. MS (ESI)  $m/z = 876.3$   $[\text{M} + \text{Na}]^+$ .

***tert*-Butyl (S)-4-((S)-4-(*tert*-butoxy)-2-((R)-2-(5-chloro-1*H*-indole-2-carboxamido)-3-(naphthalen-2-yl)propanamido)-4-oxobutanamido)-5-((3-methoxyphenyl)amino)-5-oxopentanoate (81c).**

$^1\text{H}$  NMR (500 MHz, Chloroform-*d*)  $\delta$  10.33 (s, 1H), 8.42 (s, 1H), 8.06 (s, 1H), 7.74 – 7.60 (m, 3H), 7.57 (d,  $J = 1.6$  Hz, 1H), 7.50 – 7.29 (m, 4H), 7.27 – 7.21 (m, 2H), 7.18 (d,  $J = 4.1$  Hz, 1H), 7.08 (dd,  $J = 8.8, 2.0$  Hz, 1H), 7.03 – 6.99 (m, 1H), 6.99 – 6.91 (m, 2H), 6.59 (d,  $J = 2.1$  Hz, 1H), 6.41 (ddd,  $J = 7.6, 2.5, 1.5$  Hz, 1H), 4.81 – 4.37 (m, 3H), 3.55 (s, 3H), 3.36

(dd,  $J = 13.5, 7.6$  Hz, 1H), 3.26 (dd,  $J = 13.5, 7.8$  Hz, 1H), 2.78 (dd,  $J = 17.0, 4.5$  Hz, 1H), 2.46 – 2.20 (m, 3H), 2.18 – 2.05 (m, 2H), 1.35 (s, 9H), 1.22 (s, 9H).  $^{13}\text{C}$  NMR (126 MHz, Chloroform- $d$ )  $\delta$  173.7, 171.7, 170.9, 170.7, 169.5, 162.6, 159.8, 138.9, 135.4, 133.5, 133.4, 132.5, 130.4, 129.3, 128.6, 128.2, 128.0, 127.6, 127.5, 127.0, 126.5, 126.1, 126.0, 125.1, 121.0, 113.6, 112.2, 110.0, 105.7, 103.1, 82.1, 81.1, 57.0, 55.1, 54.0, 50.3, 37.3, 35.7, 32.2, 28.1, 27.9, 27.3. MS (ESI)  $m/z = 876.4$   $[\text{M} + \text{Na}]^+$ .

**(R)-4-((S)-3-Carboxy-2-((S)-2-(5-chloro-1H-indole-2-carboxamido)-3-(naphthalen-2-yl)propanamido)propanamido)-5-((3-methoxyphenyl)amino)-5-oxopentanoic acid (47).**  $^1\text{H}$  NMR (500 MHz, DMSO- $d_6$ )  $\delta$  12.28 (s, 2H), 11.62 (s, 1H), 9.80 (s, 1H), 8.76 (d,  $J = 8.3$  Hz, 1H), 8.66 (d,  $J = 7.2$  Hz, 1H), 8.21 (d,  $J = 8.1$  Hz, 1H), 7.95 – 7.72 (m, 4H), 7.72 – 7.63 (m, 1H), 7.53 (d,  $J = 8.5$  Hz, 1H), 7.48 – 7.25 (m, 4H), 7.16 (ddd,  $J = 19.7, 9.6, 5.0$  Hz, 4H), 6.78 – 6.42 (m, 1H), 4.89 (td,  $J = 9.7, 8.6, 3.7$  Hz, 1H), 4.64 (q,  $J = 7.0$  Hz, 1H), 4.43 (td,  $J = 8.5, 4.8$  Hz, 1H), 3.67 (s, 3H), 3.46-3.24 (m, 1H), 3.16 (dd,  $J = 13.9, 10.6$  Hz, 1H), 2.78 (dd,  $J = 16.5, 6.1$  Hz, 1H), 2.64 (dd,  $J = 16.5, 7.6$  Hz, 1H), 2.30 (ddt,  $J = 20.0, 16.4, 10.4$  Hz, 2H), 2.06 (td,  $J = 9.3, 5.1$  Hz, 1H), 1.88 (dq,  $J = 9.4, 5.0, 4.4$  Hz, 1H).  $^{13}\text{C}$  NMR (126 MHz, DMSO- $d_6$ )  $\delta$  174.3, 172.2, 172.1, 171.0, 170.3, 161.1, 159.9, 140.2, 136.4, 135.2, 133.4, 133.0, 132.2, 129.9, 128.5, 128.3, 127.9, 127.8, 127.7, 126.4, 125.8, 124.6, 123.9, 121.1, 114.3, 112.2, 109.4, 105.7, 103.4, 55.4, 54.9, 53.3, 50.5, 37.9, 36.5, 30.6, 27.7. HRMS (ESI) Calcd for  $\text{C}_{38}\text{H}_{36}\text{ClN}_5\text{O}_9$  ( $\text{M} - \text{H}$ ) $^-$  740.2123, found 740.2121. HPLC purity 96.6%,  $t_{\text{R}} = 10.13$  min (condition A1); 97.1%,  $t_{\text{R}} = 12.74$  min (condition B1).

**(S)-4-((R)-3-Carboxy-2-((S)-2-(5-chloro-1H-indole-2-carboxamido)-3-(naphthalen-2-yl)propanamido)propanamido)-5-((3-methoxyphenyl)amino)-5-oxopentanoic acid (48).**  $^1\text{H}$  NMR (500 MHz, DMSO- $d_6$ )  $\delta$  12.26 (s, 2H), 11.56 (s, 1H), 9.77 (s, 1H), 8.77 (d,  $J = 8.2$  Hz, 1H), 8.67 (d,  $J = 7.5$  Hz, 1H), 8.26 (d,  $J = 8.1$  Hz, 1H), 8.01 – 7.73 (m, 4H), 7.69 (s, 1H), 7.54 (d,  $J = 8.5$  Hz, 1H), 7.49 – 7.32 (m, 4H), 7.28 – 7.00 (m, 4H), 6.79 – 6.41 (m, 1H), 5.04 – 4.84 (m, 1H), 4.75 – 4.59 (m, 1H), 4.41 (dt,  $J = 8.7, 4.2$  Hz, 1H), 3.68 (s, 3H), 3.46-3.24 (m, 1H), 3.17 (dd,  $J = 13.8, 10.4$  Hz, 1H), 2.71 (dd,  $J = 16.5, 5.9$  Hz, 1H), 2.58 (dd,  $J = 16.5, 7.7$  Hz, 1H), 2.38 – 2.15 (m, 2H), 2.07 (ddd,  $J = 14.7, 10.0, 5.3$  Hz, 1H), 1.90 (ddd,  $J = 14.1, 9.6, 5.3$  Hz, 1H).  $^{13}\text{C}$  NMR (126 MHz, DMSO- $d_6$ )  $\delta$  174.3, 172.1, 172.0, 171.0, 170.3, 161.2, 159.9, 140.2, 136.3, 135.3, 133.4, 133.0, 132.2, 129.9, 128.4, 128.3, 127.9, 127.9, 127.8, 126.4, 125.8, 124.7, 123.9, 121.1, 114.3, 112.2, 109.4, 105.7, 103.4, 55.4, 55.1, 53.4, 50.3, 37.9, 36.7, 30.5, 27.6. HRMS (ESI) Calcd for  $\text{C}_{38}\text{H}_{36}\text{ClN}_5\text{O}_9$  ( $\text{M} - \text{H}$ ) $^-$  740.2123, found 740.2123. HPLC purity 95.2%,  $t_{\text{R}} = 10.14$  min (condition A1); 96.1%,  $t_{\text{R}} = 12.71$  min (condition B1).

**(S)-4-((S)-3-Carboxy-2-((R)-2-(5-chloro-1H-indole-2-carboxamido)-3-(naphthalen-2-yl)propanamido)propanamido)-5-((3-methoxyphenyl)amino)-5-oxopentanoic acid (49).**  $^1\text{H}$  NMR (500 MHz, DMSO- $d_6$ )  $\delta$  12.27 (s, 2H), 11.55 (s, 1H), 9.75 (s, 1H), 8.80 (d,  $J = 8.1$  Hz, 1H), 8.67 (d,  $J = 7.9$  Hz, 1H), 8.14 (d,  $J = 7.7$  Hz, 1H), 7.98 – 7.76 (m, 4H), 7.69 (d,  $J = 2.1$  Hz, 1H), 7.54 (dd,  $J = 8.5, 1.7$  Hz, 1H), 7.48 – 7.34 (m, 3H), 7.29 (t,  $J = 2.3$  Hz, 1H), 7.25 – 6.98 (m, 4H), 6.61 (dd,  $J = 8.3, 2.4$  Hz, 1H), 4.89 (ddd,  $J = 10.6, 8.2, 4.4$  Hz, 1H), 4.69 (td,  $J = 7.8, 5.3$  Hz, 1H), 4.36 (td,  $J = 8.3, 5.2$  Hz, 1H), 3.70 (s, 3H), 3.46-3.24 (m, 1H), 3.17 (dd,  $J = 13.8, 10.3$  Hz, 1H), 2.73 (dd,  $J = 16.6, 5.4$  Hz, 1H), 2.62 – 2.51 (m, 1H), 2.36 – 2.22 (m, 2H), 2.06 – 1.99 (m, 1H), 1.92 (tt,  $J = 9.8, 5.3$  Hz, 1H).  $^{13}\text{C}$  NMR (126 MHz, DMSO- $d_6$ )  $\delta$  174.4, 172.3, 172.0, 171.1, 170.3, 161.2, 159.9, 140.2, 136.3, 135.2, 133.4, 133.0, 132.3, 129.9, 128.5, 128.3, 127.91, 127.89, 127.8, 126.4, 125.9, 124.7, 124.0, 121.1, 114.3, 112.1, 109.4, 105.6, 103.5, 55.4, 55.1, 53.6, 50.1, 37.9, 36.6, 30.7, 27.6. HRMS (ESI) Calcd for  $\text{C}_{38}\text{H}_{36}\text{ClN}_5\text{O}_9$  ( $\text{M} - \text{H}$ ) $^-$  740.2123, found 740.2121. HPLC purity 96.7%,  $t_{\text{R}} = 10.11$  min (condition A1); 97.9%,  $t_{\text{R}} = 12.53$  min (condition B1).

**(9H-Fluoren-9-yl)methyl (S)-(1,5-dioxo-1-((4-(trifluoromethoxy)phenyl)amino)-5-(tritylamino)pentan-2-yl)carbamate (82).** Yield, 75%. <sup>1</sup>H NMR (500 MHz, Chloroform-d)  $\delta$  9.12 (s, 1H), 7.65 (dd,  $J = 8.2, 3.5$  Hz, 2H), 7.49 (d,  $J = 7.5$  Hz, 2H), 7.36 – 7.05 (m, 21H), 7.01 – 6.89 (m, 2H), 6.88 (s, 1H), 6.00 (d,  $J = 7.0$  Hz, 1H), 4.30 (t,  $J = 6.1$  Hz, 2H), 4.11 (t,  $J = 7.1$  Hz, 1H), 4.03 (q,  $J = 7.1$  Hz, 1H), 2.59 – 2.49 (m, 1H), 2.42 – 2.31 (m, 1H), 2.13 – 1.99 (m, 1H), 1.90 – 1.85 (m, 1H). <sup>13</sup>C NMR (126 MHz, Chloroform-d)  $\delta$  172.5, 169.5, 156.3, 145.08, 145.06, 144.2, 143.8, 143.7, 141.34, 141.33, 136.5, 128.7, 128.1, 127.77, 127.76, 127.2, 127.1, 125.1, 121.4, 120.9, 120.0, 119.5, 80.0, 67.0, 54.3, 47.2, 34.0, 30.5. MS (ESI)  $m/z = 792.3$  [M + Na]<sup>+</sup>.

**tert-Butyl (S)-3-(((9H-fluoren-9-yl)methoxy)carbonyl)amino-4-(((S)-1,5-dioxo-1-((4-(trifluoromethoxy)phenyl)amino)-5-(tritylamino)pentan-2-yl)amino)-4-oxobutanoate (83).** Yield, 71%. <sup>1</sup>H NMR (500 MHz, Chloroform-d)  $\delta$  9.03 (s, 1H), 7.97 (d,  $J = 6.5$  Hz, 1H), 7.67 (dd,  $J = 7.5, 4.7$  Hz, 2H), 7.47 (dt,  $J = 6.4, 3.1$  Hz, 4H), 7.31 (td,  $J = 7.4, 3.7$  Hz, 2H), 7.23 – 7.04 (m, 17H), 7.00 (d,  $J = 8.6$  Hz, 2H), 6.88 (s, 1H), 5.66 (d,  $J = 7.3$  Hz, 1H), 4.44 – 4.18 (m, 4H), 4.10 (t,  $J = 7.1$  Hz, 1H), 2.86 – 2.52 (m, 3H), 2.40 (ddd,  $J = 15.8, 7.4, 4.2$  Hz, 1H), 2.20 – 2.00 (m, 1H), 1.65 (s, 1H), 1.34 (s, 9H). <sup>13</sup>C NMR (126 MHz, Chloroform-d)  $\delta$  173.0, 170.9, 170.6, 169.3, 156.1, 145.1, 144.2, 143.8, 143.6, 141.3, 136.7, 128.6, 128.1, 127.7, 127.2, 127.09, 127.08, 125.1, 121.5, 121.4, 121.2, 120.0, 82.1, 70.9, 67.3, 54.0, 51.8, 47.1, 37.4, 33.9, 28.2, 28.0.

**tert-Butyl 2-(((S)-1-(((S)-4-(tert-butoxy)-1-(((S)-1,5-dioxo-1-((4-(trifluoromethoxy)phenyl)amino)-5-(tritylamino)pentan-2-yl)amino)-1,4-dioxobutan-2-yl)amino)-3-(naphthalen-2-yl)-1-oxopropan-2-yl)carbamoyl)-5-chloro-1H-indole-1-carboxylate (84).** Yield, 65%. <sup>1</sup>H NMR (500 MHz, Chloroform-d)  $\delta$  8.76 (s, 1H), 7.75 (dd,  $J = 7.2, 3.3$  Hz, 2H), 7.70 (dd,  $J = 9.5, 4.7$  Hz, 2H), 7.60 (td,  $J = 5.9, 5.0, 3.3$  Hz, 4H), 7.50 (d,  $J = 7.4$  Hz, 1H), 7.46 (s, 1H), 7.41 (dd,  $J = 6.3, 3.3$  Hz, 2H), 7.30 – 7.21 (m, 3H), 7.03 – 6.91 (m, 11H), 6.90 – 6.82 (m, 6H), 6.72 (d,  $J = 5.8$  Hz, 1H), 5.90 (s, 1H), 4.74 (td,  $J = 7.9, 5.1$  Hz, 1H), 4.61 (dt,  $J = 10.7, 5.3$  Hz, 1H), 4.22 (ddd,  $J = 10.7, 6.6, 3.6$  Hz, 1H), 3.46 (dd,  $J = 14.4, 4.8$  Hz, 1H), 3.16 (dd,  $J = 14.4, 9.1$  Hz, 1H), 2.91 (dd,  $J = 16.3, 5.1$  Hz, 1H), 2.63 (dd,  $J = 16.3, 8.4$  Hz, 1H), 2.42 (td,  $J = 8.9, 5.3$  Hz, 1H), 2.29 – 2.15 (m, 2H), 2.04 (dt,  $J = 10.4, 3.8$  Hz, 1H), 1.48 (s, 9H), 1.31 (s, 9H). <sup>13</sup>C NMR (126 MHz, Chloroform-d)  $\delta$  172.0, 171.2, 170.5, 170.0, 169.5, 163.6, 149.6, 145.0 (d,  $J = 2.0$  Hz), 144.4, 136.9, 134.4, 133.7, 133.5, 133.4, 132.7, 129.4, 129.1, 129.0, 128.7, 128.6, 127.9, 127.8, 127.7, 127.6, 126.85, 126.76, 126.6, 126.2, 121.6, 121.5, 121.4, 121.0, 116.4, 111.2, 86.7, 81.7, 70.2, 56.4, 54.5, 51.2, 36.7, 36.5, 34.4, 29.0, 28.04, 27.96.

**(S)-4-(((S)-5-Amino-1,5-dioxo-1-((4-(trifluoromethoxy)phenyl)amino)pentan-2-yl)amino)-3-(((S)-2-(5-chloro-1H-indole-2-carboxamido)-3-(naphthalen-2-yl)propanamido)-4-oxobutanoic acid (50).** <sup>1</sup>H NMR (500 MHz, DMSO-d<sub>6</sub>)  $\delta$  12.45 (s, 1H), 11.84 – 11.29 (m, 1H), 10.09 (s, 1H), 8.82 (d,  $J = 8.3$  Hz, 1H), 8.63 (d,  $J = 7.5$  Hz, 1H), 8.13 (d,  $J = 7.5$  Hz, 1H), 7.94 – 7.64 (m, 7H), 7.56 (d,  $J = 8.4$  Hz, 1H), 7.48 – 7.35 (m, 3H), 7.31 (d,  $J = 8.7$  Hz, 3H), 7.21 (d,  $J = 2.1$  Hz, 1H), 7.15 (dd,  $J = 8.7, 2.1$  Hz, 1H), 6.85 (s, 1H), 4.89 (ddd,  $J = 11.9, 8.4, 3.8$  Hz, 1H), 4.65 (q,  $J = 7.2$  Hz, 1H), 4.35 (q,  $J = 7.3$  Hz, 1H), 3.30-3.32 (m, 1H), 3.16 (dd,  $J = 13.9, 10.9$  Hz, 1H), 2.81 (dd,  $J = 16.7, 5.5$  Hz, 1H), 2.63 (dd,  $J = 16.6, 8.0$  Hz, 1H), 2.18 (t,  $J = 8.2$  Hz, 2H), 2.01 (q,  $J = 7.2, 6.7$  Hz, 1H), 1.92 (p,  $J = 7.5, 7.0$  Hz, 1H). <sup>13</sup>C NMR (126 MHz, DMSO-d<sub>6</sub>)  $\delta$  174.1, 172.4, 172.1, 171.1, 170.7, 161.2, 144.1, 138.4, 136.5, 135.3, 133.4, 133.0, 132.2, 128.4, 128.3, 127.9, 127.8, 127.7, 126.4, 125.8, 124.7, 123.9, 122.1, 121.2, 121.1, 120.6 (t,  $J = 253.7$  Hz), 114.3, 103.4, 55.0, 53.8, 50.2, 37.9, 36.4, 31.8, 28.2. HRMS (ESI) Calcd for C<sub>38</sub>H<sub>34</sub>ClF<sub>3</sub>N<sub>6</sub>O<sub>8</sub> (M – H)<sup>-</sup> 793.2000, found 793.1999. HPLC purity 100%,  $t_R = 10.16$  min (condition A1); 100%,  $t_R = 12.53$  min (condition B1).

**tert-Butyl (S)-4-((S)-4-amino-2-(((benzyloxy)carbonyl)amino)-4-oxobutanamido)-5-oxo-5-((4-(trifluoromethoxy)phenyl)amino)pentanoate (85).** Yield, 70%. <sup>1</sup>H NMR (500 MHz, Acetone-*d*<sub>6</sub>) δ 9.57 (s, 1H), 7.93 (dd, *J* = 28.0, 8.6 Hz, 3H), 7.47 – 7.27 (m, 5H), 7.26 – 7.10 (m, 3H), 6.95 – 6.49 (m, 2H), 5.11 (d, *J* = 1.8 Hz, 2H), 4.51 (tdd, *J* = 11.2, 7.8, 4.6 Hz, 2H), 3.10 – 2.71 (m, 2H), 2.39 (dddd, *J* = 16.6, 14.0, 10.4, 6.1 Hz, 3H), 2.01 – 1.87 (m, 1H), 1.42 (s, 9H). <sup>13</sup>C NMR (126 MHz, Acetone-*d*<sub>6</sub>) δ 172.7, 171.9, 171.4, 170.1, 156.1, 144.4, 138.4, 137.1, 128.3, 127.8, 127.7, 121.6, 121.2, 121.1, 79.6, 66.1, 53.4, 52.1, 36.9, 31.5, 27.4, 26.6. MS (ESI) *m/z* = 611.3 [M + H]<sup>+</sup>, 633.3 [M + Na]<sup>+</sup>.

**tert-Butyl 2-(((S)-1-(((S)-4-amino-1-(((S)-5-(tert-butoxy)-1,5-dioxo-1-((4-(trifluoromethoxy)phenyl)amino)pentan-2-yl)amino)-1,4-dioxobutan-2-yl)amino)-3-(naphthalen-2-yl)-1-oxopropan-2-yl)carbamoyl)-5-chloro-1*H*-indole-1-carboxylate (86).** Yield, 62%. <sup>1</sup>H NMR (500 MHz, Acetone-*d*<sub>6</sub>) δ 9.41 (s, 1H), 8.32 (d, *J* = 6.6 Hz, 1H), 8.24 (d, *J* = 7.0 Hz, 1H), 8.11 – 7.93 (m, 3H), 7.91 – 7.82 (m, 4H), 7.80 (d, *J* = 8.0 Hz, 1H), 7.61 (d, *J* = 2.1 Hz, 1H), 7.55 (dd, *J* = 8.3, 1.8 Hz, 1H), 7.51 – 7.40 (m, 2H), 7.37 (dd, *J* = 8.9, 2.1 Hz, 1H), 7.32 – 7.11 (m, 3H), 6.95 (d, *J* = 0.8 Hz, 1H), 6.71 (s, 1H), 4.93 (ddd, *J* = 9.1, 6.5, 4.8 Hz, 1H), 4.71 (q, *J* = 6.1 Hz, 1H), 4.48 (dt, *J* = 9.5, 5.6 Hz, 1H), 3.51 (dd, *J* = 14.2, 4.8 Hz, 1H), 3.35 (dd, *J* = 14.2, 9.2 Hz, 1H), 2.89 (d, *J* = 6.0 Hz, 2H), 2.47 – 2.21 (m, 3H), 1.98 – 1.85 (m, 1H), 1.44 (s, 9H), 1.33 (s, 9H).

**(S)-4-((S)-4-Amino-2-((S)-2-(5-chloro-1*H*-indole-2-carboxamido)-3-(naphthalen-2-yl)propanamido)-4-oxobutanamido)-5-oxo-5-((4-(trifluoromethoxy)phenyl)amino)pentanoic acid (51).** Yield, 80%. <sup>1</sup>H NMR (500 MHz, DMSO-*d*<sub>6</sub>) δ 12.12 (s, 1H), 11.64 (s, 1H), 9.97 (s, 1H), 8.80 (d, *J* = 8.5 Hz, 1H), 8.61 (d, *J* = 7.5 Hz, 1H), 8.36 (d, *J* = 7.7 Hz, 1H), 7.94 – 7.75 (m, 5H), 7.69 (d, *J* = 2.1 Hz, 1H), 7.63 – 7.52 (m, 2H), 7.42 (pd, *J* = 6.8, 1.6 Hz, 2H), 7.36 (d, *J* = 8.7 Hz, 1H), 7.29 (d, *J* = 8.6 Hz, 2H), 7.20 (d, *J* = 2.1 Hz, 1H), 7.16 – 7.06 (m, 2H), 4.93 (ddd, *J* = 11.9, 8.7, 3.7 Hz, 1H), 4.64 (q, *J* = 7.1 Hz, 1H), 4.38 (ddd, *J* = 9.3, 7.6, 4.6 Hz, 1H), 3.28 (dd, *J* = 14.8, 4.7 Hz, 1H), 3.15 (dd, *J* = 13.9, 11.0 Hz, 1H), 2.69 (dd, *J* = 15.6, 7.6 Hz, 1H), 2.58 (dd, *J* = 15.5, 6.0 Hz, 1H), 2.33 (pt, *J* = 8.8, 5.2 Hz, 2H), 2.12 (dq, *J* = 9.7, 6.1 Hz, 1H), 1.86 (ddt, *J* = 13.5, 9.0, 4.7 Hz, 1H). <sup>13</sup>C NMR (126 MHz, DMSO-*d*<sub>6</sub>) δ 174.4, 172.4, 171.8, 171.7, 170.7, 161.0, 144.2, 138.4, 136.5, 135.2, 133.4, 133.1, 132.2, 128.5, 128.3, 127.9, 127.8, 127.7, 126.4, 125.8, 124.6, 123.9, 121.9, 121.5, 121.1, 120.6 (d, *J* = 253.7 Hz), 114.3, 103.3, 100.0, 54.8, 53.3, 50.4, 37.9, 37.4, 30.6, 27.2. HRMS (ESI) Calcd for C<sub>38</sub>H<sub>34</sub>ClF<sub>3</sub>N<sub>6</sub>O<sub>8</sub> (M – H)<sup>–</sup> 793.2000, found 793.1998. HPLC purity 100%, *t<sub>R</sub>* = 10.43 min (condition A1); 100%, *t<sub>R</sub>* = 13.03 min (condition B1).

**(9*H*-fluoren-9-yl)methyl (S)-(1-oxo-1-((4-(trifluoromethoxy)phenyl)amino)-3-(2-trityl-2*H*-tetrazol-5-yl)propan-2-yl)carbamate (87).** Yield, 71%. <sup>1</sup>H NMR (500 MHz, Chloroform-*d*) δ 8.62 (s, 1H), 7.76 (d, *J* = 7.6 Hz, 2H), 7.54 (t, *J* = 5.7 Hz, 2H), 7.43 – 7.35 (m, 4H), 7.35 – 7.31 (m, 3H), 7.31 – 7.21 (m, 8H), 7.18 – 6.81 (m, 8H), 6.17 (d, *J* = 8.3 Hz, 1H), 4.97 (d, *J* = 8.8 Hz, 1H), 4.41 (h, *J* = 8.6, 7.2 Hz, 2H), 4.18 (t, *J* = 6.9 Hz, 1H), 3.60 (dd, *J* = 16.0, 6.0 Hz, 1H), 3.46 (dd, *J* = 15.5, 6.3 Hz, 1H). <sup>13</sup>C NMR (126 MHz, Chloroform-*d*) δ 168.4, 161.8, 156.4, 145.4, 143.52, 143.49, 141.3, 141.0, 136.0, 130.1, 128.5, 127.8, 127.1, 125.0, 121.6, 121.5, 121.3, 120.0, 119.5, 83.4, 67.5, 53.7, 47.0, 28.5. MS (ESI) *m/z* = 803.2 [M + Na]<sup>+</sup>.

**tert-Butyl (S)-3-amino-4-oxo-4-(((S)-1-oxo-3-(2*H*-tetrazol-5-yl)-1-((4-(trifluoromethoxy)phenyl)amino)propan-2-yl)amino)butanoate (88).** Yield, 45%. <sup>1</sup>H NMR (500 MHz, Methanol-*d*<sub>4</sub>) δ 7.81 – 7.60 (m, 1H), 7.34 – 7.22 (m, 2H), 7.22 – 7.13 (m, 2H), 7.13 – 6.99 (m, 2H), 4.87 – 4.78 (m, 1H), 3.87 (dd, *J* = 7.3, 5.5 Hz, 1H), 3.43 (dd, *J* = 14.8, 5.2 Hz, 1H),



3.34 (d,  $J = 8.5$  Hz, 1H), 2.80 (dd,  $J = 17.0, 5.5$  Hz, 1H), 2.63 (dd,  $J = 17.1, 7.5$  Hz, 1H), 1.42 (s, 9H).

**tert-Butyl 2-(((S)-1-(((S)-4-(tert-butoxy)-1,4-dioxo-1-(((S)-1-oxo-3-(2H-tetrazol-5-yl)-1-((4-(trifluoromethoxy)phenyl)amino)propan-2-yl)amino)butan-2-yl)amino)-3-(naphthalen-2-yl)-1-oxopropan-2-yl)carbamoyl)-5-chloro-1H-indole-1-carboxylate (89).** Yield, 53%.  $^1\text{H}$  NMR (500 MHz, Acetone- $d_6$ )  $\delta$  9.41 (s, 1H), 8.46 (d,  $J = 6.5$  Hz, 1H), 8.38 (d,  $J = 6.9$  Hz, 1H), 8.10 (d,  $J = 8.1$  Hz, 1H), 7.99 (d,  $J = 8.9$  Hz, 1H), 7.91 – 7.77 (m, 6H), 7.67 – 7.52 (m, 2H), 7.51 – 7.42 (m, 2H), 7.37 (dd,  $J = 8.9, 2.2$  Hz, 1H), 7.24 (d,  $J = 8.6$  Hz, 2H), 6.78 (s, 1H), 4.93 (dtd,  $J = 12.4, 8.7, 7.9, 4.9$  Hz, 2H), 4.69 (q,  $J = 6.7$  Hz, 1H), 3.66 (dd,  $J = 15.4, 4.8$  Hz, 1H), 3.60 – 3.42 (m, 2H), 3.35 (dd,  $J = 14.2, 9.5$  Hz, 1H), 2.97 (dd,  $J = 16.6, 6.0$  Hz, 1H), 2.76 (dd,  $J = 16.6, 7.2$  Hz, 1H), 1.50 (s, 9H), 1.41 (s, 9H).

**(S)-3-(((S)-2-(5-Chloro-1H-indole-2-carboxamido)-3-(naphthalen-2-yl)propanamido)-4-oxo-4-(((S)-1-oxo-3-(2H-tetrazol-5-yl)-1-((4-(trifluoromethoxy)phenyl)amino)propan-2-yl)amino)butanoic acid (52).** Yield, 75%.  $^1\text{H}$  NMR (500 MHz, DMSO- $d_6$ )  $\delta$  11.66 (s, 1H), 10.03 (s, 1H), 8.74 (dd,  $J = 40.3, 7.8$  Hz, 2H), 8.42 (d,  $J = 7.6$  Hz, 1H), 7.98 – 7.59 (m, 8H), 7.55 (d,  $J = 8.4$  Hz, 1H), 7.46 – 7.35 (m, 3H), 7.28 (d,  $J = 8.5$  Hz, 2H), 7.23 – 7.07 (m, 2H), 4.94 – 4.79 (m, 2H), 4.61 (q,  $J = 7.0$  Hz, 1H), 3.45 (dd,  $J = 15.1, 6.3$  Hz, 2H), 3.15 (d,  $J = 12.1$  Hz, 1H), 2.77 (dd,  $J = 16.7, 5.5$  Hz, 1H), 2.69 – 2.58 (m, 2H).  $^{13}\text{C}$  NMR (126 MHz, DMSO- $d_6$ )  $\delta$  172.3, 172.3, 171.1, 170.0, 161.1, 144.3, 138.1, 136.5, 135.2, 133.4, 133.0, 132.2, 128.4, 128.3, 127.9, 127.7, 126.4, 125.8, 124.6, 123.9, 122.0, 121.4, 121.1, 114.3, 103.3, 54.9, 52.7, 50.4, 37.8, 36.4, 26.1. HRMS (ESI) Calcd for  $\text{C}_{37}\text{H}_{31}\text{ClF}_3\text{N}_9\text{O}_7$  (M-H) $^-$  804.1909, found 793.1919. HPLC purity 97.0%,  $t_R = 10.61$  min (condition A1); 100%,  $t_R = 13.03$  min (condition B1).

**Benzyl ((S)-4-amino-1,4-dioxo-1-(((S)-1-oxo-1-((4-(trifluoromethoxy)phenyl)amino)-3-(2-trityl-2H-tetrazol-5-yl)propan-2-yl)amino)butan-2-yl)carbamate (93).** Yield, 66%.  $^1\text{H}$  NMR (500 MHz, Chloroform- $d$ )  $\delta$  8.88 (s, 1H), 7.84 (d,  $J = 8.4$  Hz, 1H), 7.53 (d,  $J = 8.5$  Hz, 2H), 7.34 – 7.09 (m, 13H), 7.02 (d,  $J = 8.6$  Hz, 2H), 6.96 – 6.80 (m, 7H), 6.13 (d,  $J = 6.4$  Hz, 1H), 5.64 (s, 1H), 5.30 (s, 1H), 5.09 – 4.94 (m, 2H), 4.90 (d,  $J = 12.1$  Hz, 1H), 4.32 (q,  $J = 5.9$  Hz, 1H), 3.70 (dd,  $J = 15.9, 5.3$  Hz, 1H), 3.26 (dd,  $J = 15.8, 5.0$  Hz, 1H), 2.66 (d,  $J = 5.7$  Hz, 2H). MS (ESI)  $m/z = 829.3$  [M + Na] $^+$ .

**tert-Butyl 2-(((S)-1-(((S)-4-amino-1,4-dioxo-1-(((S)-1-oxo-3-(2H-tetrazol-5-yl)-1-((4-(trifluoromethoxy)phenyl)amino)propan-2-yl)amino)butan-2-yl)amino)-3-(naphthalen-2-yl)-1-oxopropan-2-yl)carbamoyl)-5-chloro-1H-indole-1-carboxylate (94).** Yield, 41%.  $^1\text{H}$  NMR (500 MHz, DMSO- $d_6$ )  $\delta$  9.96 (s, 1H), 8.94 (d,  $J = 8.5$  Hz, 1H), 8.60 (t,  $J = 7.6$  Hz, 2H), 7.92 (d,  $J = 8.9$  Hz, 1H), 7.87 – 7.71 (m, 6H), 7.66 (s, 1H), 7.55 (dd,  $J = 8.4, 1.7$  Hz, 1H), 7.50 – 7.35 (m, 3H), 7.29 (d,  $J = 8.5$  Hz, 2H), 7.19 (d,  $J = 8.3$  Hz, 1H), 6.74 (s, 1H), 4.86 (dddd,  $J = 19.4, 11.5, 8.1, 4.7$  Hz, 2H), 4.59 (q,  $J = 7.0$  Hz, 1H), 3.52 (dd,  $J = 15.3, 5.7$  Hz, 1H), 3.29 – 3.24 (m, 1H), 3.16 (s, 1H), 3.02 (dd,  $J = 14.0, 10.8$  Hz, 1H), 2.69 (dd,  $J = 15.9, 7.5$  Hz, 1H), 2.57 (dd,  $J = 15.7, 5.8$  Hz, 1H), 1.26 (s, 9H). MS (ESI)  $m/z = 905.3$  [M + H] $^+$ , 903.3 [M – H] $^-$ .

**(S)-2-(((S)-2-(5-Chloro-1H-indole-2-carboxamido)-3-(naphthalen-2-yl)propanamido)-N<sup>1</sup>-((S)-1-oxo-3-(2H-tetrazol-5-yl)-1-((4-(trifluoromethoxy)phenyl)amino)propan-2-yl)succinamide (54).** Yield, 75%.  $^1\text{H}$  NMR (500 MHz, DMSO- $d_6$ )  $\delta$  11.63 (d,  $J = 2.2$  Hz, 1H), 9.99 (s, 1H), 8.75 (d,  $J = 8.5$  Hz, 1H), 8.59 (t,  $J = 8.2$  Hz, 2H), 7.94 – 7.73 (m, 6H), 7.69 (d,  $J = 2.0$  Hz, 1H), 7.64 (s, 1H), 7.56 (d,  $J = 8.4$  Hz, 1H), 7.48 – 7.33 (m, 3H), 7.29 (d,  $J = 8.6$  Hz, 2H), 7.22 – 7.06 (m, 3H), 5.00 – 4.75 (m, 2H), 4.60 (q,  $J = 6.9$  Hz, 1H), 3.52 (dd,  $J = 15.2, 5.8$  Hz, 1H), 3.24 (dd,  $J = 14.0, 3.7$  Hz, 2H), 3.12 (dd,  $J = 14.0, 11.0$  Hz, 1H), 2.69 (dd,  $J = 15.7, 7.2$  Hz, 1H), 2.59 (dd,  $J = 15.7, 5.9$  Hz, 1H).  $^{13}\text{C}$  NMR (126 MHz, DMSO- $d_6$ )  $\delta$  172.5, 172.0, 171.5, 161.1,

144.3, 138.1, 136.5, 135.2, 133.4, 133.0, 132.2, 128.4, 128.3, 127.9, 127.8, 127.7, 126.4, 125.8, 124.6, 123.9, 121.9, 121.6, 121.1, 120.6 (d,  $J = 253.8$  Hz), 114.3, 103.3, 54.8, 52.4, 50.4, 37.9, 37.4, 25.9. HRMS (ESI) Calcd for  $C_{37}H_{32}ClF_3N_{10}O_6$  ( $M - H$ )<sup>-</sup> 803.2069, found 803.2065. HPLC purity 98.9%,  $t_R = 10.60$  min (condition A1); 100%,  $t_R = 13.17$  min (condition B1).

**General procedure for synthesis of 60a and 60b.** A mixture of 2-amino-4-chlorobenzenethiol (1eq) or 2-amino-5-chlorobenzenethiol (1eq) and ethyl 3-ethoxy-3-iminopropanoate hydrochloride (1eq) in EtOH was stirred at 70 °C for 16 h. The mixture was partitioned between EtOAc and H<sub>2</sub>O. The organic layer was washed with brine and concentrated. The residue was further purified on silica gel.

**Ethyl 2-(5-chlorobenzo[d]thiazol-2-yl)acetate (98a).** <sup>1</sup>H NMR (500 MHz, DMSO-*d*<sub>6</sub>) δ 8.13 (dd,  $J = 8.5, 0.4$  Hz, 1H), 8.06 (dd,  $J = 2.0, 0.5$  Hz, 1H), 7.49 (dd,  $J = 8.6, 2.1$  Hz, 1H), 4.34 (s, 2H), 4.17 (q,  $J = 7.1$  Hz, 2H), 1.22 (t,  $J = 7.1$  Hz, 3H). <sup>13</sup>C NMR (126 MHz, DMSO-*d*<sub>6</sub>) δ 168.9, 166.5, 153.6, 134.5, 131.4, 125.8, 124.1, 122.4, 61.6, 14.4. MS (ESI)  $m/z = 256.1$  [ $M + H$ ]<sup>+</sup>, 278.1 [ $M + Na$ ]<sup>+</sup>, 533.1 [ $2M + Na$ ]<sup>+</sup>.

**Ethyl 2-(6-chlorobenzo[d]thiazol-2-yl)acetate (98b).** <sup>1</sup>H NMR (500 MHz, Chloroform-*d*) δ 7.90 (d,  $J = 8.7$  Hz, 1H), 7.85 (d,  $J = 2.1$  Hz, 1H), 7.43 (dd,  $J = 8.7, 2.0$  Hz, 1H), 4.25 (q,  $J = 7.1$  Hz, 2H), 4.15 (s, 2H), 1.30 (t,  $J = 7.1$  Hz, 3H). <sup>13</sup>C NMR (126 MHz, Chloroform-*d*) δ 168.3, 163.3, 151.2, 137.0, 131.2, 126.9, 123.7, 121.1, 61.9, 39.7, 14.1.

**General procedure for synthesis of 60a and 60b.** To a solution of **98a** or **98b** (1eq) in THF/MeOH/H<sub>2</sub>O (4/2/1) was added NaOH (1.2eq). The mixture was stirred at rt for 6 h and was concentrated under reduced pressure and dried on the lyophilizer overnight. The resulting solid was used in the next step without further purification. For **60a**, MS (ESI)  $m/z = 228.1$  [ $M + H$ ]<sup>+</sup>, 250.0 [ $M + Na$ ]<sup>+</sup>, 477.0 [ $2M + Na$ ]<sup>+</sup>.

The procedure for synthesis of **60c** and **60d** was similar to **60a** and **60b**, with the modified temperature of 80 °C in the first step.

**Ethyl 2-(5-chlorobenzo[d]oxazol-2-yl)acetate (98c).** <sup>1</sup>H NMR (500 MHz, DMSO-*d*<sub>6</sub>) δ 7.86 (dd,  $J = 2.2, 0.5$  Hz, 1H), 7.77 (dd,  $J = 8.7, 0.6$  Hz, 1H), 7.45 (dd,  $J = 8.7, 2.2$  Hz, 1H), 4.23 (s, 2H), 4.16 (q,  $J = 7.1$  Hz, 2H), 1.20 (t,  $J = 7.1$  Hz, 3H). <sup>13</sup>C NMR (126 MHz, DMSO-*d*<sub>6</sub>) δ 167.5, 162.4, 149.7, 142.4, 129.3, 125.9, 119.9, 112.6, 61.8, 35.2, 14.4. Hydrolysis of 101a yielded compound 102a. MS (ESI)  $m/z = 212.1$  [ $M + H$ ]<sup>+</sup>, 234.1 [ $M + Na$ ]<sup>+</sup>, 445.1 [ $2M + Na$ ]<sup>+</sup>.

**Ethyl 2-(6-chlorobenzo[d]oxazol-2-yl)acetate (98d).** <sup>1</sup>H NMR (500 MHz, Chloroform-*d*) δ 7.61 (dd,  $J = 8.5, 0.5$  Hz, 1H), 7.53 (dd,  $J = 2.0, 0.5$  Hz, 1H), 7.31 (dd,  $J = 8.5, 2.0$  Hz, 1H), 4.24 (q,  $J = 7.1$  Hz, 2H), 3.99 (s, 2H), 1.28 (t,  $J = 7.2$  Hz, 3H). <sup>13</sup>C NMR (126 MHz, Chloroform-*d*) δ 166.7, 160.3, 151.3, 139.9, 130.9, 125.2, 120.6, 111.3, 62.0, 35.3, 14.1. MS (ESI)  $m/z = 240.1$  [ $M + H$ ]<sup>+</sup>, 262.1 [ $M + Na$ ]<sup>+</sup>, 501.1 [ $2M + Na$ ]<sup>+</sup>. Hydrolysis of **98d** yielded compound **60d**. MS (ESI)  $m/z = 212.1$  [ $M + H$ ]<sup>+</sup>, 234.1 [ $M + Na$ ]<sup>+</sup>.

The procedure for synthesis of **60e** was similar to **60a**.

**Ethyl 2-(5-chloro-1*H*-benzo[d]imidazol-2-yl)acetate (98e).** <sup>1</sup>H NMR (500 MHz, DMSO-*d*<sub>6</sub>) δ 12.54 (s, 1H), 7.55 (d,  $J = 30.1$  Hz, 2H), 7.29 – 7.00 (m, 1H), 4.13 (q,  $J = 7.1$  Hz, 2H), 3.98 (s, 2H), 1.20 (t,  $J = 7.1$  Hz, 3H). <sup>13</sup>C NMR (126 MHz, DMSO-*d*<sub>6</sub>) δ 169.0, 149.9, 126.1, 122.5, 120.0, 118.3, 112.9, 111.5, 100.0, 61.3, 35.5, 14.5. Hydrolysis of **98e** yielded compound **60e**. MS (ESI)  $m/z = 211.1$  [ $M + H$ ]<sup>+</sup>, 209.1 [ $M - H$ ]<sup>-</sup>.

The coupling reaction described in the main text was used to prepare compound **99**.

**Methyl (S)-2-(5-chloro-1*H*-indole-2-carboxamido)-3-(naphthalen-2-yl)propanoate (99a).** <sup>1</sup>H NMR (500 MHz, Chloroform-*d*) δ 9.66 (s, 1H), 7.91 – 7.71 (m, 3H), 7.63 – 7.59 (m, 1H), 7.57 (d,  $J = 1.9$  Hz, 1H), 7.51 – 7.42 (m, 2H), 7.35 (dt,  $J = 8.8, 0.8$  Hz, 1H), 7.28 (dd,  $J = 8.4, 1.8$  Hz, 1H),

7.23 (dd,  $J = 8.7, 2.0$  Hz, 1H), 6.84 – 6.71 (m, 2H), 5.21 (dt,  $J = 7.9, 5.7$  Hz, 1H), 3.78 (s, 3H), 3.60 – 3.31 (m, 2H).  $^{13}\text{C}$  NMR (126 MHz, Chloroform- $d$ )  $\delta$  171.8, 160.8, 134.8, 133.5, 133.1, 132.6, 131.1, 128.48, 128.47, 128.2, 127.7, 127.6, 127.2, 126.3, 125.9, 125.2, 121.2, 113.1, 102.4, 53.4, 52.6, 38.3. MS (ESI)  $m/z = 429.1$  [ $\text{M} + \text{Na}$ ] $^+$ .

**Methyl (S)-2-(5-chloro-1H-indole-2-carboxamido)-3-(3,4-dichlorophenyl)propanoate (99b).**  $^1\text{H}$  NMR (500 MHz, Chloroform- $d$ )  $\delta$  10.27 (s, 1H), 7.54 (d,  $J = 2.0$  Hz, 1H), 7.35 – 7.30 (m, 2H), 7.29 (d,  $J = 2.1$  Hz, 1H), 7.21 (dd,  $J = 8.8, 2.0$  Hz, 1H), 7.14 (d,  $J = 7.8$  Hz, 1H), 7.01 (dd,  $J = 8.2, 2.1$  Hz, 1H), 6.81 (dd,  $J = 2.3, 0.9$  Hz, 1H), 5.12 (dt,  $J = 7.7, 6.1$  Hz, 1H), 3.82 (s, 3H), 3.27 (dd,  $J = 14.0, 5.8$  Hz, 1H), 3.18 (dd,  $J = 14.0, 6.4$  Hz, 1H).  $^{13}\text{C}$  NMR (126 MHz, Chloroform- $d$ )  $\delta$  171.9, 161.4, 136.0, 135.1, 132.7, 131.5, 131.2, 130.8, 130.6, 128.6, 128.3, 126.3, 125.2, 121.2, 113.3, 102.8, 53.4, 52.9, 37.2. MS (ESI)  $m/z = 447.0$  [ $\text{M} + \text{Na}$ ] $^+$ .

**Methyl (S)-2-(5-chloro-1H-indole-2-carboxamido)-3-(4-chlorophenyl)propanoate (99c).**  $^1\text{H}$  NMR (500 MHz, Chloroform- $d$ )  $\delta$  10.18 (s, 1H), 7.47 (d,  $J = 2.1$  Hz, 1H), 7.24 (d,  $J = 8.7$  Hz, 1H), 7.17 – 7.08 (m, 3H), 7.05 – 6.96 (m, 2H), 6.92 (d,  $J = 7.8$  Hz, 1H), 6.75 – 6.46 (m, 1H), 5.03 (dt,  $J = 7.7, 6.0$  Hz, 1H), 3.71 (s, 3H), 3.20 (dd,  $J = 14.0, 5.7$  Hz, 1H), 3.12 (dd,  $J = 14.0, 6.2$  Hz, 1H).  $^{13}\text{C}$  NMR (126 MHz, Chloroform- $d$ )  $\delta$  172.0, 161.2, 135.1, 134.1, 133.3, 130.9, 130.6, 128.9, 128.3, 126.3, 125.2, 121.2, 113.3, 102.6, 53.5, 52.8, 37.4. MS (ESI)  $m/z = 391.1$  [ $\text{M} + \text{H}$ ] $^+$ , 413.1 [ $\text{M} + \text{Na}$ ] $^+$ , 389.0 [ $\text{M} - \text{H}$ ] $^-$ .

**Methyl (S)-2-(5-chloro-1H-indole-2-carboxamido)-3-(2-chlorophenyl)propanoate (99d).**  $^1\text{H}$  NMR (500 MHz, Chloroform- $d$ )  $\delta$  10.43 (s, 1H), 7.56 (d,  $J = 2.1$  Hz, 1H), 7.40 (dd,  $J = 5.8, 3.5$  Hz, 1H), 7.37 – 7.06 (m, 6H), 6.83 (d,  $J = 2.0$  Hz, 1H), 5.22 (qd,  $J = 7.0, 6.1, 2.4$  Hz, 1H), 3.82 (s, 3H), 3.50 (dd,  $J = 14.0, 5.7$  Hz, 1H), 3.38 (dd,  $J = 13.9, 8.3$  Hz, 1H).  $^{13}\text{C}$  NMR (126 MHz, Chloroform- $d$ )  $\delta$  172.4, 161.5, 135.1, 134.3, 134.0, 131.4, 131.0, 129.8, 128.9, 128.3, 127.1, 126.1, 125.0, 121.1, 113.4, 102.59, 102.56, 52.9, 52.8, 35.6. MS (ESI)  $m/z = 391.1$  [ $\text{M} + \text{H}$ ] $^+$ , 413.1 [ $\text{M} + \text{Na}$ ] $^+$ .

**Methyl (S)-2-(5-chloro-1H-indole-2-carboxamido)-3-(4-(trifluoromethyl)phenyl)propanoate (99e).**  $^1\text{H}$  NMR (500 MHz, Acetone- $d_6$ )  $\delta$  11.09 (s, 1H), 8.26 (d,  $J = 8.3$  Hz, 1H), 7.72 – 7.48 (m, 6H), 7.23 (dd,  $J = 8.7, 2.0$  Hz, 1H), 7.17 (dd,  $J = 2.2, 0.9$  Hz, 1H), 5.06 (ddd,  $J = 9.4, 8.2, 5.3$  Hz, 1H), 3.72 (s, 3H), 3.43 (dd,  $J = 14.0, 5.3$  Hz, 1H), 3.29 (dd,  $J = 14.0, 9.4$  Hz, 1H).  $^{13}\text{C}$  NMR (126 MHz, Acetone- $d_6$ )  $\delta$  171.5, 161.1, 142.3, 135.3, 132.2, 130.0, 128.7, 128.5, 128.2, 125.6, 125.3, 125.2 (q,  $J = 3.8$  Hz), 124.2, 123.4, 120.9, 113.8, 102.6, 53.7, 51.7, 36.9. MS (ESI)  $m/z = 425.1$  [ $\text{M} + \text{H}$ ] $^+$ , 447.1 [ $\text{M} + \text{Na}$ ] $^+$ .

**Methyl (S)-2-(5-chloro-1H-indole-2-carboxamido)-3-(4-cyanophenyl)propanoate (99f).**  $^1\text{H}$  NMR (500 MHz, Chloroform- $d$ )  $\delta$  10.36 (d,  $J = 2.2$  Hz, 1H), 7.40 (dd,  $J = 8.7, 2.1$  Hz, 3H), 7.33 – 7.14 (m, 4H), 7.09 (dd,  $J = 8.7, 2.0$  Hz, 1H), 6.74 (dd,  $J = 2.3, 0.9$  Hz, 1H), 5.04 (td,  $J = 7.4, 5.7$  Hz, 1H), 3.70 (s, 3H), 3.28 (dd,  $J = 13.9, 5.7$  Hz, 1H), 3.16 (dd,  $J = 13.9, 7.1$  Hz, 1H).  $^{13}\text{C}$  NMR (126 MHz, Chloroform- $d$ )  $\delta$  171.9, 161.5, 141.6, 135.2, 132.4, 130.8, 130.1, 128.3, 126.2, 125.1, 121.2, 118.6, 113.4, 111.1, 102.9, 53.4, 52.9, 38.0. MS (ESI)  $m/z = 382.1$  [ $\text{M} + \text{H}$ ] $^+$ , 404.1 [ $\text{M} + \text{Na}$ ] $^+$ , 380.1 [ $\text{M} - \text{H}$ ] $^-$ .

**Methyl (S)-2-(5-chloro-1H-indole-2-carboxamido)-3-(4-methoxyphenyl)propanoate (99g).**  $^1\text{H}$  NMR (500 MHz, Chloroform- $d$ )  $\delta$  10.82 (d,  $J = 2.3$  Hz, 1H), 7.52 (d,  $J = 1.9$  Hz, 1H), 7.41 (d,  $J = 7.9$  Hz, 1H), 7.34 (dt,  $J = 8.7, 0.8$  Hz, 1H), 7.21 (dd,  $J = 8.7, 2.0$  Hz, 1H), 7.18 (s, 1H), 7.16 (s, 1H), 7.05 – 6.68 (m, 3H), 5.16 (ddd,  $J = 7.9, 6.9, 5.7$  Hz, 1H), 3.82 (s, 3H), 3.76 (s, 3H), 3.31 (dd,  $J = 14.0, 5.6$  Hz, 1H), 3.23 (dd,  $J = 14.0, 7.0$  Hz, 1H).  $^{13}\text{C}$  NMR (126 MHz, Chloroform- $d$ )  $\delta$  172.8, 161.7, 158.8, 135.3, 131.2, 130.3, 128.3, 127.8, 126.0, 124.8, 121.0, 114.2, 113.5, 102.7, 55.2, 54.1, 52.7, 37.1. MS (ESI)  $m/z = 387.1$  [ $\text{M} + \text{H}$ ] $^+$ , 409.1 [ $\text{M} + \text{Na}$ ] $^+$ .

**tert-Butyl (S)-5-chloro-2-((1-methoxy-3-(naphthalen-2-yl)-1-oxopropan-2-yl)carbamoyl)-1H-indole-1-carboxylate (100a).** To the solution of methyl (S)-2-(5-chloro-1H-indole-2-carboxamido)-3-(naphthalen-2-yl)propanoate (1eq) in DCM at 0 °C was added Boc<sub>2</sub>O (1.5eq) and DMAP (0.01eq). The mixture was stirred at 0 °C for 4 h. Water was added to the mixture. The organic layer was concentrated and the residue was further purified by silica column. <sup>1</sup>H NMR (500 MHz, Chloroform-*d*) δ 8.02 (d, *J* = 8.9 Hz, 1H), 7.89 – 7.70 (m, 3H), 7.67 – 7.54 (m, 1H), 7.52 – 7.39 (m, 3H), 7.31 (ddd, *J* = 9.1, 7.6, 1.9 Hz, 2H), 6.62 (d, *J* = 0.7 Hz, 1H), 6.59 – 6.50 (m, 1H), 5.16 (dt, *J* = 7.9, 5.7 Hz, 1H), 3.79 (s, 3H), 3.50 (dd, *J* = 13.9, 5.8 Hz, 1H), 3.39 (dd, *J* = 13.9, 5.5 Hz, 1H), 1.58 (s, 9H). <sup>13</sup>C NMR (126 MHz, Chloroform-*d*) δ 171.6, 161.3, 148.8, 135.5, 135.1, 133.4, 133.1, 132.6, 128.82, 128.77, 128.4, 128.3, 127.7, 127.5, 127.3, 126.4, 126.3, 125.9, 121.0, 116.3, 110.4, 85.2, 53.4, 52.5, 38.0, 27.8. MS (ESI) *m/z* = 529.2 [M + Na]<sup>+</sup>, 505.2 [M - H]<sup>-</sup>. Hydrolysis of **100a** yielded compound **68a**.

**tert-Butyl (S)-5-chloro-2-((3-(3,4-dichlorophenyl)-1-methoxy-1-oxopropan-2-yl)carbamoyl)-1H-indole-1-carboxylate (100b).** <sup>1</sup>H NMR (500 MHz, Chloroform-*d*) δ 7.98 (d, *J* = 8.9 Hz, 1H), 7.50 (d, *J* = 2.1 Hz, 1H), 7.36 (d, *J* = 8.2 Hz, 1H), 7.33 – 7.27 (m, 2H), 7.03 (dd, *J* = 8.2, 2.1 Hz, 1H), 6.88 – 6.43 (m, 2H), 5.03 (dt, *J* = 7.5, 5.6 Hz, 1H), 3.78 (s, 3H), 3.30 (dd, *J* = 14.0, 5.7 Hz, 1H), 3.15 (dd, *J* = 14.0, 5.4 Hz, 1H), 1.60 (s, 10H). <sup>13</sup>C NMR (126 MHz, Chloroform-*d*) δ 171.2, 161.4, 148.8, 136.0, 135.3, 134.9, 132.5, 131.52, 131.48, 130.5, 128.9, 128.8, 128.7, 126.5, 121.1, 116.4, 110.6, 85.3, 53.3, 52.7, 36.9, 27.8. MS (ESI) *m/z* = 547.1 [M + Na]<sup>+</sup>, 523.1 [M - H]<sup>-</sup>. Hydrolysis of **100b** yielded compound **68b**.

**tert-Butyl (S)-5-chloro-2-((3-(4-chlorophenyl)-1-methoxy-1-oxopropan-2-yl)carbamoyl)-1H-indole-1-carboxylate (100c).** <sup>1</sup>H NMR (500 MHz, Chloroform-*d*) δ 8.02 (d, *J* = 8.9 Hz, 1H), 7.52 (d, *J* = 2.0 Hz, 1H), 7.37 – 7.23 (m, 3H), 7.18 – 7.03 (m, 2H), 6.68 (d, *J* = 21.6 Hz, 2H), 5.07 (dt, *J* = 7.7, 5.6 Hz, 1H), 3.78 (s, 3H), 3.31 (dd, *J* = 14.0, 5.8 Hz, 1H), 3.20 (dd, *J* = 14.0, 5.5 Hz, 1H), 1.61 (s, 9H). <sup>13</sup>C NMR (126 MHz, Chloroform-*d*) δ 171.4, 161.3, 148.8, 135.4, 135.0, 134.2, 133.3, 130.7, 128.9, 128.79, 128.77, 126.4, 121.1, 116.4, 110.5, 85.2, 53.3, 52.6, 37.2, 27.8. MS (ESI) *m/z* = 513.1 [M + Na]<sup>+</sup>, 489.2 [M - H]<sup>-</sup>. Hydrolysis of **100c** yielded compound **68c**.

**tert-Butyl (S)-5-chloro-2-((3-(2-chlorophenyl)-1-methoxy-1-oxopropan-2-yl)carbamoyl)-1H-indole-1-carboxylate (100d).** <sup>1</sup>H NMR (500 MHz, Chloroform-*d*) δ 7.90 (d, *J* = 9.0 Hz, 1H), 7.37 (d, *J* = 2.1 Hz, 1H), 7.32 – 7.25 (m, 1H), 7.23 – 7.16 (m, 2H), 7.15 – 7.01 (m, 2H), 6.72 (d, *J* = 8.3 Hz, 1H), 6.58 (d, *J* = 0.7 Hz, 1H), 5.02 (td, *J* = 7.9, 6.1 Hz, 1H), 3.65 (s, 3H), 3.30 (d, *J* = 6.1 Hz, 1H), 3.21 (dd, *J* = 13.9, 7.6 Hz, 1H), 1.44 (s, 9H). <sup>13</sup>C NMR (126 MHz, Chloroform-*d*) δ 171.8, 161.4, 148.8, 135.4, 135.0, 134.5, 133.9, 131.5, 129.7, 128.8, 128.73, 128.71, 127.0, 126.3, 121.0, 116.3, 110.4, 85.1, 52.6, 52.5, 35.6, 27.7. MS (ESI) *m/z* = 513.1 [M + Na]<sup>+</sup>, Hydrolysis of **100d** yielded compound **68d**.

**tert-Butyl (S)-5-chloro-2-((1-methoxy-1-oxo-3-(4-(trifluoromethyl)phenyl)propan-2-yl)carbamoyl)-1H-indole-1-carboxylate (100e).** <sup>1</sup>H NMR (500 MHz, Acetone-*d*<sub>6</sub>) δ 8.22 (d, *J* = 8.3 Hz, 1H), 8.05 (d, *J* = 8.8 Hz, 1H), 7.78 – 7.50 (m, 5H), 7.37 (dd, *J* = 8.9, 2.2 Hz, 1H), 6.85 (s, 1H), 5.01 (td, *J* = 8.7, 5.3 Hz, 1H), 3.74 (s, 3H), 3.41 (dd, *J* = 13.9, 5.3 Hz, 1H), 3.25 (dd, *J* = 13.9, 8.9 Hz, 1H), 1.49 (s, 9H). <sup>13</sup>C NMR (126 MHz, Acetone-*d*<sub>6</sub>) δ 171.4, 161.3, 148.8, 142.0, 135.7, 135.3, 130.2, 129.1, 128.5 (d, *J* = 32.0 Hz), 128.2, 125.8, 125.6, 125.2 (q, *J* = 3.8 Hz), 123.5, 121.1, 115.9, 109.9, 84.6, 53.7, 51.8, 37.1, 26.8. MS (ESI) *m/z* = 547.1 [M + Na]<sup>+</sup>, 523.1 [M - H]<sup>-</sup>, Hydrolysis of **100e** yielded compound **68e**.

**tert-Butyl (S)-5-chloro-2-((3-(4-cyanophenyl)-1-methoxy-1-oxopropan-2-yl)carbamoyl)-1H-indole-1-carboxylate (100f).** <sup>1</sup>H NMR (500 MHz, Chloroform-*d*) δ 7.82 (dd, *J* = 9.0, 2.4 Hz, 1H), 7.46 (dd, *J* = 8.3, 2.0 Hz, 2H), 7.33 (d, *J* = 2.2 Hz, 1H), 7.26 – 7.19 (m, 2H), 7.16 (dt, *J* = 9.0, 2.3

Hz, 1H), 6.94 (t,  $J = 7.4$  Hz, 1H), 6.56 (d,  $J = 2.0$  Hz, 1H), 4.95 (dt,  $J = 8.0, 6.0$  Hz, 1H), 3.64 (d,  $J = 2.0$  Hz, 3H), 3.25 (ddd,  $J = 14.0, 5.9, 2.2$  Hz, 1H), 3.11 (dd,  $J = 13.9, 6.4$  Hz, 1H), 1.47 (d,  $J = 2.4$  Hz, 9H).  $^{13}\text{C}$  NMR (126 MHz, Chloroform-*d*)  $\delta$  171.1, 161.5, 148.8, 141.7, 135.2, 134.8, 132.2, 130.2, 128.73, 128.69, 126.3, 121.1, 118.6, 116.2, 111.0, 110.5, 85.2, 53.2, 52.6, 37.9, 27.7. MS (ESI)  $m/z = 504.2$   $[\text{M} + \text{Na}]^+$ , 480.2  $[\text{M} - \text{H}]^-$ , Hydrolysis of **100f** yielded compound **68f**.

**tert-Butyl (S)-5-chloro-2-((1-methoxy-3-(4-methoxyphenyl)-1-oxopropan-2-yl)carbamoyl)-1H-indole-1-carboxylate (100g).**  $^1\text{H}$  NMR (500 MHz, Chloroform-*d*)  $\delta$  8.20 – 7.82 (m, 1H), 7.48 (d,  $J = 2.0$  Hz, 1H), 7.30 (dd,  $J = 8.9, 2.1$  Hz, 1H), 7.12 – 7.00 (m, 2H), 6.92 – 6.74 (m, 2H), 6.69 – 6.50 (m, 2H), 5.03 (dt,  $J = 8.0, 5.6$  Hz, 1H), 3.77 (s, 3H), 3.76 (s, 3H), 3.23 (dd,  $J = 14.0, 5.7$  Hz, 1H), 3.15 (dd,  $J = 14.0, 5.6$  Hz, 1H), 1.58 (s, 9H).  $^{13}\text{C}$  NMR (126 MHz, Chloroform-*d*)  $\delta$  171.7, 161.3, 158.8, 148.8, 135.4, 135.2, 130.4, 128.78, 128.76, 127.5, 126.3, 121.0, 116.3, 114.1, 110.3, 85.1, 55.2, 53.5, 52.5, 37.1, 27.8. MS (ESI)  $m/z = 509.1$   $[\text{M} + \text{Na}]^+$ , Hydrolysis of **100g** yielded compound **68g**.

**Methyl (S)-2-(4,6-dichloro-1H-indole-2-carboxamido)-3-(naphthalen-2-yl)propanoate (99h).**  $^1\text{H}$  NMR (500 MHz, DMSO-*d*<sub>6</sub>)  $\delta$  12.04 (s, 1H), 9.15 (d,  $J = 8.0$  Hz, 1H), 7.91 – 7.77 (m, 4H), 7.55 – 7.41 (m, 3H), 7.41 – 7.31 (m, 2H), 7.23 (d,  $J = 1.7$  Hz, 1H), 4.86 (ddd,  $J = 10.1, 8.0, 5.3$  Hz, 1H), 3.66 (s, 3H), 3.38 (dd,  $J = 13.9, 5.3$  Hz, 1H), 3.26 (dd,  $J = 13.9, 10.1$  Hz, 1H).  $^{13}\text{C}$  NMR (126 MHz, DMSO-*d*<sub>6</sub>)  $\delta$  172.3, 160.7, 137.3, 135.6, 133.4, 133.0, 132.3, 128.4, 128.2, 128.0, 127.93, 127.87, 127.8, 126.9, 126.5, 126.0, 125.1, 120.0, 111.6, 101.9, 54.4, 52.6, 37.0. MS (ESI)  $m/z = 463.1$   $[\text{M} + \text{Na}]^+$

**(S)-2-(4,6-Dichloro-1H-indole-2-carboxamido)-3-(naphthalen-2-yl)propanoic acid (68h).**  $^1\text{H}$  NMR (500 MHz, DMSO-*d*<sub>6</sub>)  $\delta$  14.01 (s, 1H), 8.86 (s, 1H), 7.82 – 7.66 (m, 4H), 7.60 (d,  $J = 6.4$  Hz, 1H), 7.49 – 7.30 (m, 3H), 7.14 (d,  $J = 1.7$  Hz, 1H), 6.96 (d,  $J = 3.2$  Hz, 1H), 4.70 – 4.45 (m, 1H), 3.37-3.32 (m, 1H), 3.14 (dd,  $J = 13.5, 8.0$  Hz, 1H). MS (ESI)  $m/z = 449.1$   $[\text{M} + \text{Na}]^+$

**5-Ethyl 1-methyl ((S)-4-ethoxy-2-((S)-2-(5-methoxy-1H-indole-2-carboxamido)-3-(naphthalen-2-yl)propanamido)-4-oxobutanoyl)-L-glutamate ((Et)-15).** To a solution of compound **15** (60 mg, 0.09 mmol), EtOH (52  $\mu\text{L}$ , 0.9 mmol) and EDC·HCl (69 mg, 0.36 mmol) in  $\text{CH}_2\text{Cl}_2$ , was added DMAP (1 mg, 0.009 mmol). The mixture was stirred at rt overnight. Then the organic phase was washed with water and dried over  $\text{Na}_2\text{SO}_4$ . The pure compound was obtained by column chromatography (40% yield).  $^1\text{H}$  NMR (500 MHz, Chloroform-*d*)  $\delta$  10.25 – 10.13 (m, 1H), 7.83 (d,  $J = 8.8$  Hz, 1H), 7.72 – 7.62 (m, 4H), 7.40 – 7.29 (m, 5H), 7.02 – 6.91 (m, 2H), 6.80 (d,  $J = 6.4$  Hz, 1H), 6.71 (d,  $J = 2.1$  Hz, 1H), 5.12 (q,  $J = 6.6$  Hz, 1H), 4.90 (ddd,  $J = 8.7, 6.3, 4.4$  Hz, 1H), 4.43 (td,  $J = 8.0, 5.3$  Hz, 1H), 4.13 (qd,  $J = 7.1, 1.8$  Hz, 2H), 3.95 (qd,  $J = 7.1, 2.5$  Hz, 2H), 3.83 (s, 3H), 3.70 (s, 3H), 3.43 (dd,  $J = 13.9, 6.1$  Hz, 1H), 3.33 (dd,  $J = 14.0, 7.5$  Hz, 1H), 3.01 (dd,  $J = 17.4, 4.4$  Hz, 1H), 2.62 (dd,  $J = 17.3, 6.4$  Hz, 1H), 2.45 – 2.28 (m, 2H), 2.17 (ddt,  $J = 11.6, 9.6, 5.9$  Hz, 1H), 2.09 – 1.99 (m, 1H), 1.23 (t,  $J = 7.1$  Hz, 3H), 1.11 (t,  $J = 7.1$  Hz, 3H).  $^{13}\text{C}$  NMR (126 MHz, Chloroform-*d*)  $\delta$  173.4, 171.8, 171.6, 170.7, 170.4, 154.6, 133.5, 132.5, 132.4, 129.8, 128.7, 127.9, 127.6, 127.5, 127.0, 126.3, 125.8, 116.3, 113.3, 102.9, 102.0, 77.2, 61.1, 60.9, 55.7, 55.0, 52.4, 52.1, 49.1, 38.3, 35.9, 30.4, 26.9, 14.1, 13.9. HRMS (ESI) Calcd for  $\text{C}_{37}\text{H}_{42}\text{N}_4\text{O}_{10}$   $(\text{M} + \text{Na})^+$  725.2793, found 725.2776. HPLC purity 98.4%,  $t_{\text{R}} = 13.73$  min (condition A2); 98.1%,  $t_{\text{R}} = 15.42$  min (condition B2).

**HPLC Conditions and Traces:** The purity of final compounds **2–57** and **(Et)-15** was determined by HPLC analysis. The instrument was an Agilent 1260 Infinity II HPLC system with a quaternary pump, a vial sampler, and a DAD detector. A Kromasil 300–5–C18 column (4.6 × 250 mm) was used. The DAD detector was set to 220, 254, and 280 nm. The purity of all tested compounds was >95%. Some HPLC traces are shown below.

**Condition A1.** Elute with gradient starting with 0.1% TFA in water and end with 0.1% TFA in water and acetonitrile mixture (water with 0.1% TFA : acetonitrile = 1 : 1) in 6 min, and then change to a 5 min-gradient starting with 0.1% TFA in water and acetonitrile 1 : 1 mixture and ending with 100% acetonitrile, and at last elute with 100% acetonitrile for 9 min.

**Condition A2.** Elute with gradient starting with 0.1% TFA in water and end with 0.1% TFA in water and acetonitrile mixture (water with 0.1% TFA : acetonitrile = 1 : 1) in 10 min, and then change to a 5-min gradient starting with 0.1% TFA in water and acetonitrile 1 : 1 mixture and ending with 100% acetonitrile, and at last elute with 100% acetonitrile for 5 min.

**Condition B1.** Elute with gradient starting with 0.1% TFA in water and end with 0.1% TFA in water and methanol mixture (water with 0.1% TFA : methanol = 30 : 70) in 8 min, and then change to a 4-min gradient starting with 0.1% TFA in water and methanol 30 : 70 mixture and ending with 0.1% TFA in water and methanol 5 : 95 mixture, and at last elute with 0.1% TFA in water and methanol 5 : 95 mixture for 8 min.

**Condition B2.** Elute with gradient starting with 0.1% TFA in water and end with 0.1% TFA in water and methanol mixture (water with 0.1% TFA : methanol = 30 : 70) in 12 min, and then change to a 4-min gradient starting with 0.1% TFA in water and methanol 30 : 70 mixture and ending with 0.1% TFA in water and methanol 5 : 95 mixture, and at last elute with 0.1% TFA in water and methanol 5 : 95 mixture for 4 min.

# Compound 52, condition A1.

Data File C:\Chem32\1\Data\Zhen\Zhen 2018-05-20 09-06-40\001-P1-F1-ZW-5-64-4-2.D  
Sample Name: ZW-5-64-4-2

```
=====
Acq. Operator   : SYSTEM                      Seq. Line :    1
Acq. Instrument : HPLC                       Location  : P1-F1
Injection Date  : 5/20/2018 9:10:10 AM       Inj       :    1
                                           Inj Volume: 20.000 µl
Sequence File   : C:\Chem32\1\Data\Zhen\Zhen 2018-05-20 09-06-40\Zhen.S
Method          : C:\Chem32\1\Data\Zhen\Zhen 2018-05-20 09-06-40\Zhen.M-2.M (Sequence Method)
Last changed    : 5/20/2018 9:06:40 AM by SYSTEM
=====
```

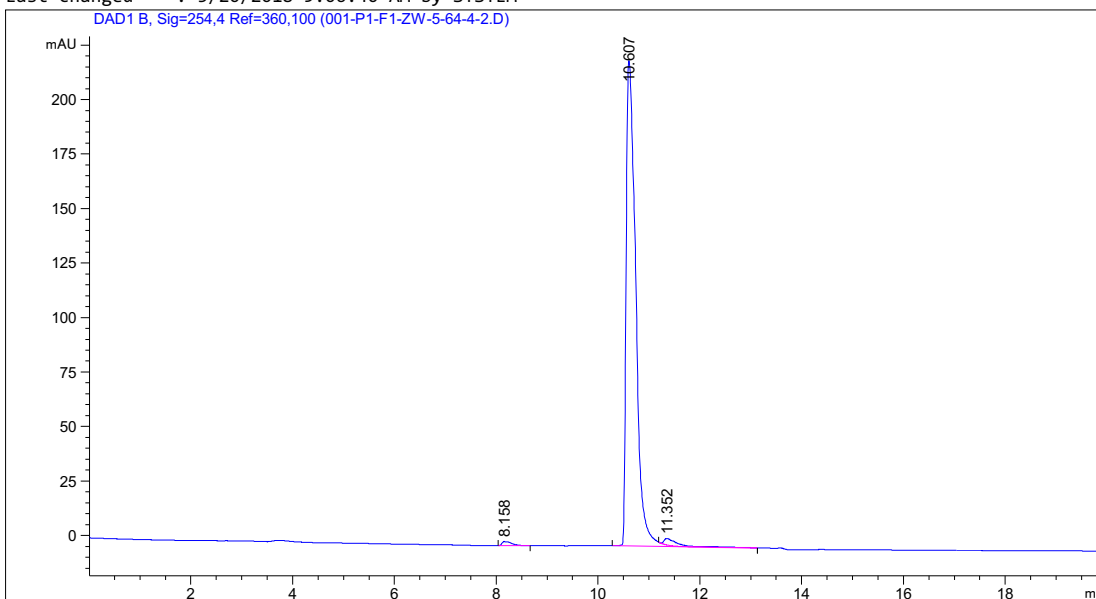

## Area Percent Report

```
Sorted By      : Signal
Multiplier     : 1.0000
Dilution       : 1.0000
Use Multiplier & Dilution Factor with ISTDs
```

Signal 1: DAD1 B, Sig=254,4 Ref=360,100

| Peak # | RetTime [min] | Type | Width [min] | Area [mAU*s] | Height [mAU] | Area %  |
|--------|---------------|------|-------------|--------------|--------------|---------|
| 1      | 8.158         | BB   | 0.1776      | 24.20502     | 1.79153      | 0.8092  |
| 2      | 10.607        | BV R | 0.1879      | 2902.11816   | 222.82851    | 97.0210 |
| 3      | 11.352        | VB E | 0.2875      | 64.90414     | 2.98676      | 2.1698  |

Totals :                    2991.22733   227.60679

\*\*\* End of Report \*\*\*

# Compound 52, condition B1.

Data File C:\Chem32\1\Data\Zhen\Zhen 2018-05-20 10-25-31\002-P1-F1-ZW-5-64-4-2.D

Sample Name: ZW-5-64-4-2

```
=====
Acq. Operator   : SYSTEM                      Seq. Line :    2
Acq. Instrument : HPLC                      Location  : P1-F1
Injection Date  : 5/20/2018 10:57:47 AM      Inj       :    1
                                           Inj Volume: 20.000 µl
Sequence File   : C:\Chem32\1\Data\Zhen\Zhen 2018-05-20 10-25-31\Zhen.S
Method          : C:\Chem32\1\Data\Zhen\Zhen 2018-05-20 10-25-31\Zhen_MeOH.M-2.M (Sequence
                  Method)
Last changed    : 5/20/2018 10:25:52 AM by SYSTEM
=====
```

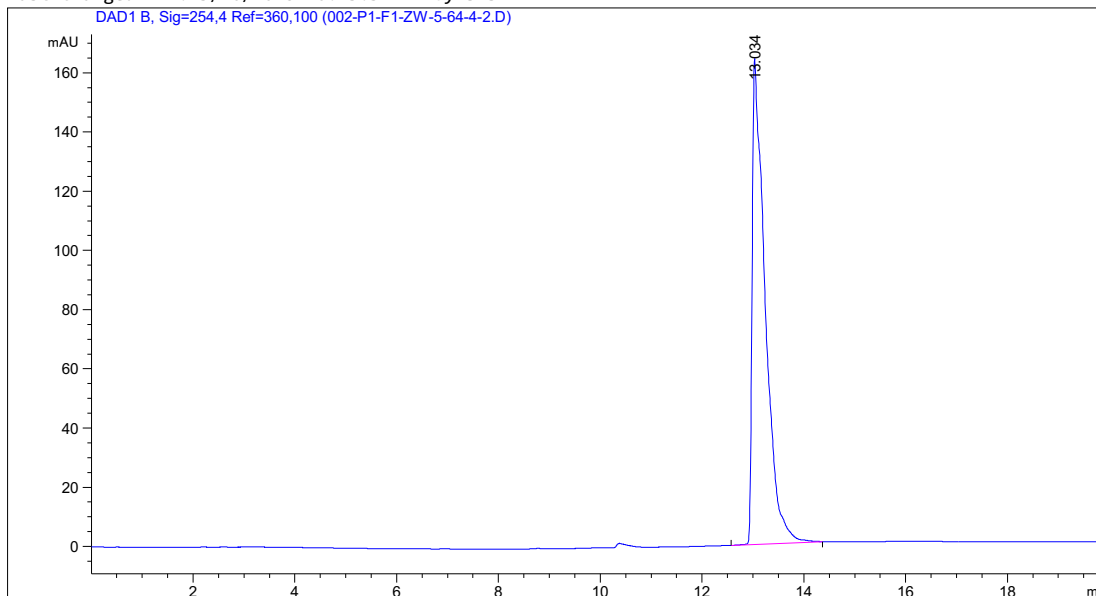

## Area Percent Report

```
Sorted By      : Signal
Multiplier     : 1.0000
Dilution       : 1.0000
Do not use Multiplier & Dilution Factor with ISTDs
```

Signal 1: DAD1 B, Sig=254,4 Ref=360,100

| Peak # | RetTime [min] | Type | Width [min] | Area [mAU*s] | Height [mAU] | Area %   |
|--------|---------------|------|-------------|--------------|--------------|----------|
| 1      | 13.034        | BB   | 0.2302      | 2899.89136   | 164.08179    | 100.0000 |

Totals :                    2899.89136 164.08179

\*\*\* End of Report \*\*\*



# Compound 53, condition A1.

Data File C:\Chem32\1\Data\Zhen\Zhen 2018-05-01 14-11-51\001-P1-F1-ZW-5-60-4-1.D  
Sample Name: ZW-5-60-4-1

=====  
Acq. Operator : SYSTEM Seq. Line : 1  
Acq. Instrument : HPLC Location : P1-F1  
Injection Date : 5/1/2018 2:15:27 PM Inj : 1  
Inj Volume : 20.000 µl  
Sequence File : C:\Chem32\1\Data\Zhen\Zhen 2018-05-01 14-11-51\Zhen.S  
Method : C:\Chem32\1\Data\Zhen\Zhen 2018-05-01 14-11-51\Zhen.M-2.M (Sequence Method)  
Last changed : 5/1/2018 2:11:51 PM by SYSTEM

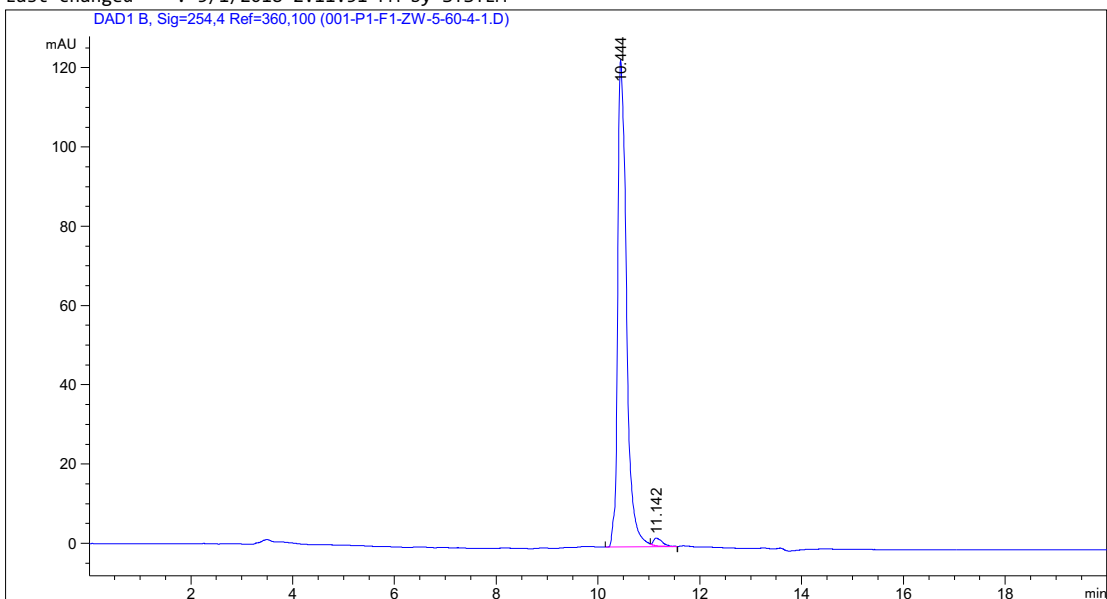

=====  
Area Percent Report  
=====

Sorted By : Signal  
Multiplier : 1.0000  
Dilution : 1.0000  
Use Multiplier & Dilution Factor with ISTDs

Signal 1: DAD1 B, Sig=254,4 Ref=360,100

| Peak # | RetTime [min] | Type | Width [min] | Area [mAU*s] | Height [mAU] | Area %  |
|--------|---------------|------|-------------|--------------|--------------|---------|
| 1      | 10.444        | BV R | 0.1663      | 1476.01453   | 122.70236    | 98.4698 |
| 2      | 11.142        | VB E | 0.1667      | 22.93664     | 1.92876      | 1.5302  |

Totals : 1498.95116 124.63113

=====  
\*\*\* End of Report \*\*\*

# Compound 53, condition B1.

Data File C:\Chem32\1\Data\Zhen\Zhen 2018-05-01 14-11-51\002-P1-F1-ZW-5-60-4-1.D

Sample Name: ZW-5-60-4-1

```
=====
Acq. Operator   : SYSTEM                      Seq. Line :    2
Acq. Instrument : HPLC                       Location  : P1-F1
Injection Date  : 5/1/2018 2:44:04 PM        Inj       :    1
                                                Inj Volume: 20.000 µl
Sequence File   : C:\Chem32\1\Data\Zhen\Zhen 2018-05-01 14-11-51\Zhen.S
Method          : C:\Chem32\1\Data\Zhen\Zhen 2018-05-01 14-11-51\Zhen_MeOH.M-2.M (Sequence
                  Method)
Last changed    : 5/1/2018 2:11:51 PM by SYSTEM
=====
```

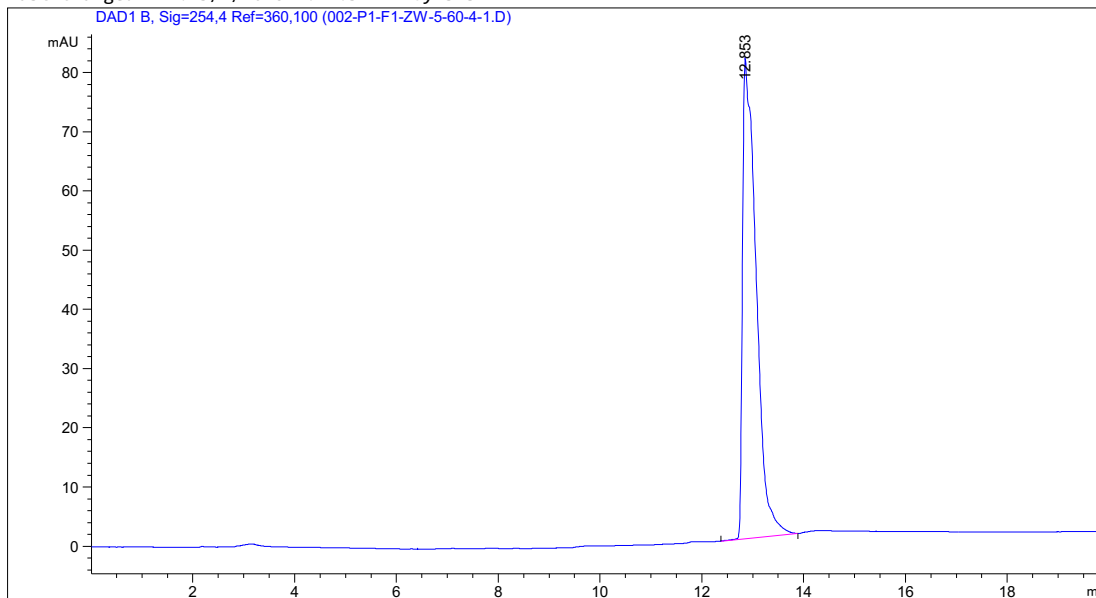

## Area Percent Report

```
Sorted By      : Signal
Multiplier     : 1.0000
Dilution       : 1.0000
Do not use Multiplier & Dilution Factor with ISTDs
```

Signal 1: DAD1 B, Sig=254,4 Ref=360,100

| Peak # | RetTime [min] | Type | Width [min] | Area [mAU*s] | Height [mAU] | Area %   |
|--------|---------------|------|-------------|--------------|--------------|----------|
| 1      | 12.853        | BB   | 0.2422      | 1502.99744   | 81.10352     | 100.0000 |

Totals :                    1502.99744   81.10352

\*\*\* End of Report \*\*\*

# Compound 54, condition A1.

Data File C:\Chem32\1\Data\Zhen\Zhen 2018-04-07 11-03-26\001-P1-F1-ZW-5-55-4.D  
Sample Name: ZW-5-55-4

```
=====
Acq. Operator   : SYSTEM                      Seq. Line :    1
Acq. Instrument : HPLC                       Location  : P1-F1
Injection Date  : 4/7/2018 11:07:21 AM      Inj       :    1
                                           Inj Volume: 20.000 µl
Sequence File   : C:\Chem32\1\Data\Zhen\Zhen 2018-04-07 11-03-26\Zhen.S
Method          : C:\Chem32\1\Data\Zhen\Zhen 2018-04-07 11-03-26\Zhen.M-2.M (Sequence Method)
Last changed    : 4/7/2018 11:03:26 AM by SYSTEM
=====
```

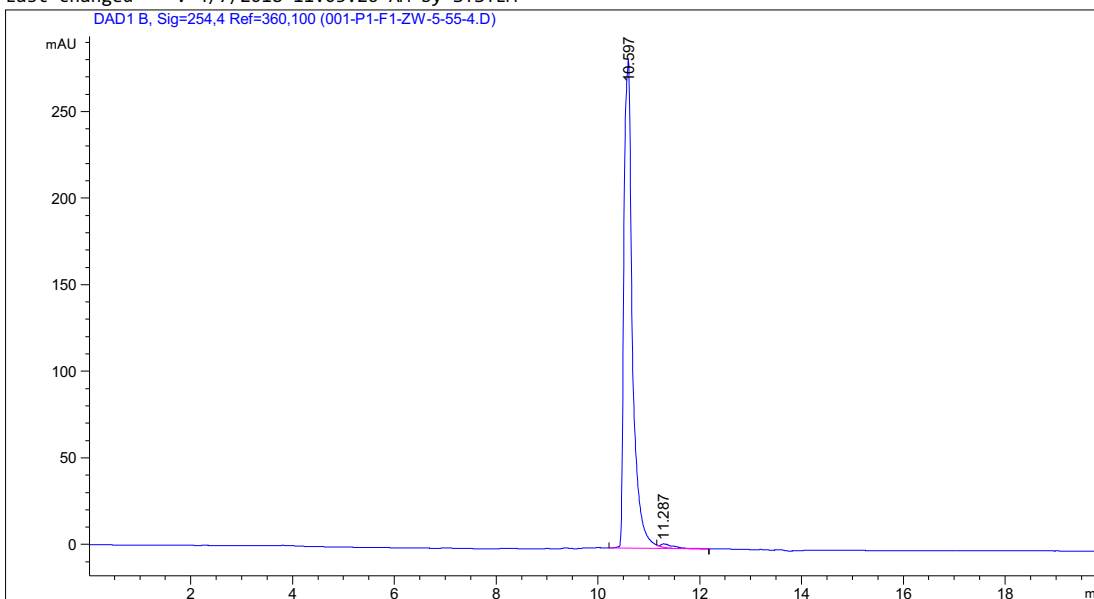

## Area Percent Report

```
Sorted By      : Signal
Multiplier     : 1.0000
Dilution       : 1.0000
Use Multiplier & Dilution Factor with ISTDs
```

Signal 1: DAD1 B, Sig=254,4 Ref=360,100

| Peak # | RetTime [min] | Type | Width [min] | Area [mAU*s] | Height [mAU] | Area %  |
|--------|---------------|------|-------------|--------------|--------------|---------|
| 1      | 10.597        | BV R | 0.1802      | 3291.28394   | 281.87790    | 98.8742 |
| 2      | 11.287        | VB E | 0.2503      | 37.47647     | 1.89877      | 1.1258  |

Totals :                    3328.76041  283.77667

\*\*\* End of Report \*\*\*

# Compound 54, condition B1.

Data File C:\Chem32\1\Data\Zhen\Zhen 2018-04-07 11-03-26\002-P1-F1-ZW-5-55-4.D  
Sample Name: ZW-5-55-4

```
=====  
Acq. Operator   : SYSTEM                      Seq. Line :    2  
Acq. Instrument : HPLC                       Location  : P1-F1  
Injection Date  : 4/7/2018 11:35:58 AM      Inj       :    1  
                                                    Inj Volume: 20.000 µl  
Method         : C:\Chem32\1\Data\Zhen\Zhen 2018-04-07 11-03-26\Zhen_MeOH.M-2.M (Sequence  
Method)  
Last changed   : 4/7/2018 11:27:18 AM by SYSTEM  
Additional Info : Peak(s) manually integrated
```

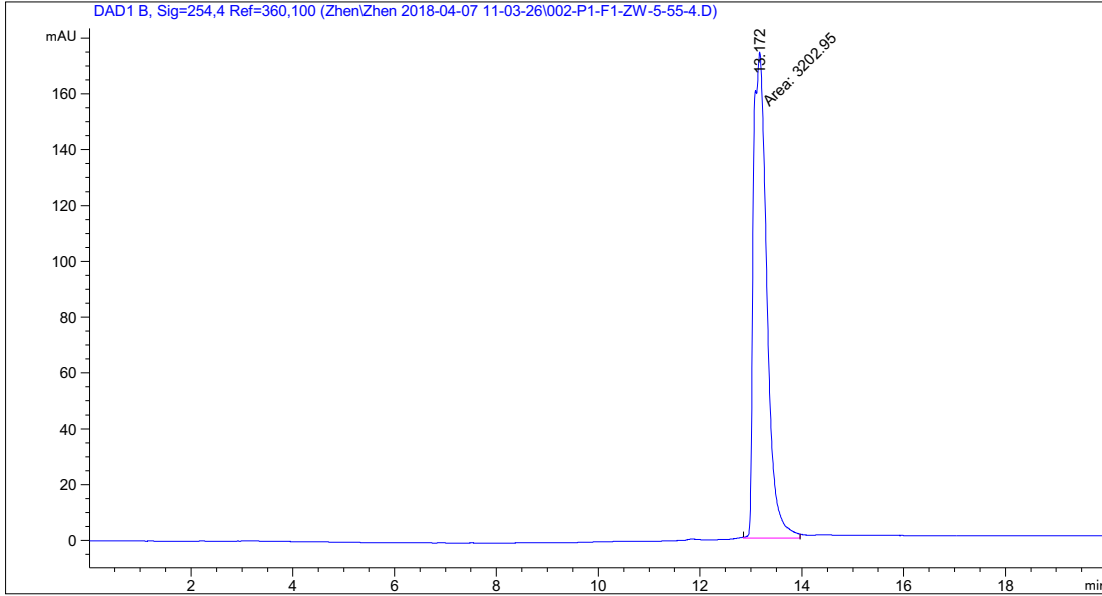

## Area Percent Report

```
=====  
Sorted By      : Signal  
Multiplier     : 1.0000  
Dilution       : 1.0000  
Do not use Multiplier & Dilution Factor with ISTDs
```

Signal 1: DAD1 B, Sig=254,4 Ref=360,100

| Peak # | RetTime [min] | Type | Width [min] | Area [mAU*s] | Height [mAU] | Area %   |
|--------|---------------|------|-------------|--------------|--------------|----------|
| 1      | 13.172        | MM   | 0.3068      | 3202.94531   | 173.99074    | 100.0000 |

Totals :                      3202.94531 173.99074

\*\*\* End of Report \*\*\*

## Compound 55, condition A2.

Data File C:\Chem32\1\Data\Zhen\Zhen 2018-07-18 13-24-08\001-P1-F1-ZW-5-74-4.D

Sample Name: ZW-5-74-4

```
=====
Acq. Operator   : SYSTEM                      Seq. Line :    1
Acq. Instrument : HPLC                       Location  : P1-F1
Injection Date  : 7/18/2018 1:27:45 PM      Inj       :    1
                                           Inj Volume: 80.000 µl
Different Inj Volume from Sample Entry! Actual Inj Volume : 20.000 µl
Sequence File   : C:\Chem32\1\Data\Zhen\Zhen 2018-07-18 13-24-08\Zhen.S
Method          : C:\Chem32\1\Data\Zhen\Zhen 2018-07-18 13-24-08\Zhen.M (Sequence Method)
Last changed    : 7/18/2018 1:24:08 PM by SYSTEM
=====
```

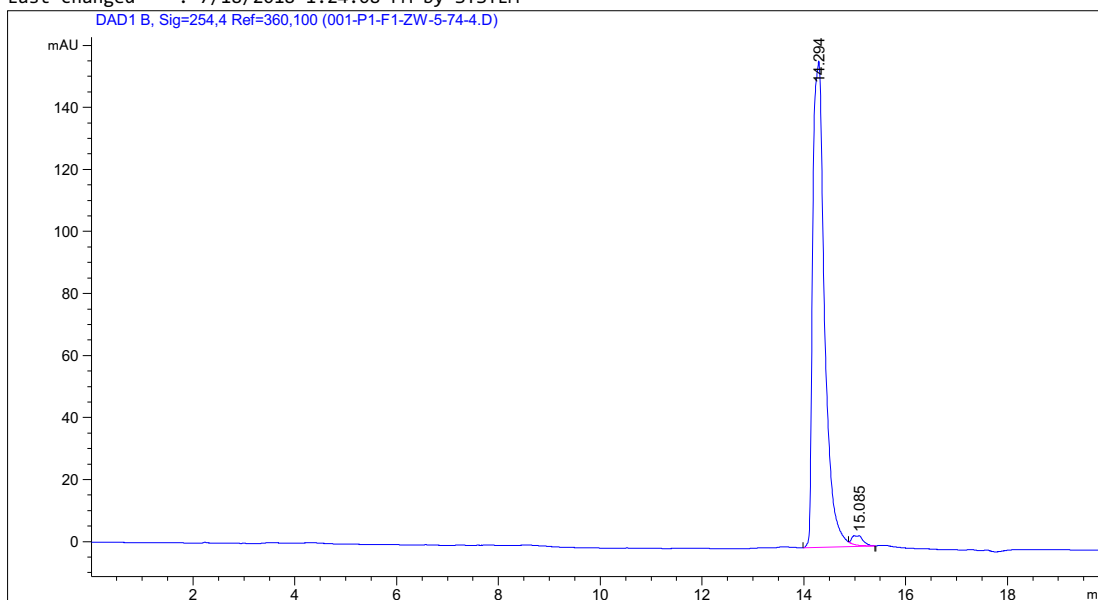

### Area Percent Report

```
=====
Sorted By      : Signal
Multiplier     : 1.0000
Dilution       : 1.0000
Use Multiplier & Dilution Factor with ISTDs
=====
```

Signal 1: DAD1 B, Sig=254,4 Ref=360,100

| Peak # | RetTime [min] | Type | Width [min] | Area [mAU*s] | Height [mAU] | Area %  |
|--------|---------------|------|-------------|--------------|--------------|---------|
| 1      | 14.294        | BV R | 0.2148      | 2534.75439   | 156.64259    | 98.2732 |
| 2      | 15.085        | VB E | 0.1882      | 44.53917     | 3.05366      | 1.7268  |

Totals :                    2579.29356 159.69625

\*\*\* End of Report \*\*\*

# Compound 55, condition B1.

Data File C:\Chem32\1\Data\Zhen\Zhen 2018-07-18 13-24-08\003-P1-F1-ZW-5-74-4.D  
Sample Name: ZW-5-74-4

```
=====
Acq. Operator   : SYSTEM                      Seq. Line :    3
Acq. Instrument : HPLC                      Location  : P1-F1
Injection Date  : 7/18/2018 2:24:58 PM      Inj       :    1
                                           Inj Volume: 20.000 µl
Sequence File   : C:\Chem32\1\Data\Zhen\Zhen 2018-07-18 13-24-08\Zhen.S
Method          : C:\Chem32\1\Data\Zhen\Zhen 2018-07-18 13-24-08\Zhen_MeOH.M-2.M (Sequence
                  Method)
Last changed    : 7/18/2018 1:40:14 PM by SYSTEM
=====
```

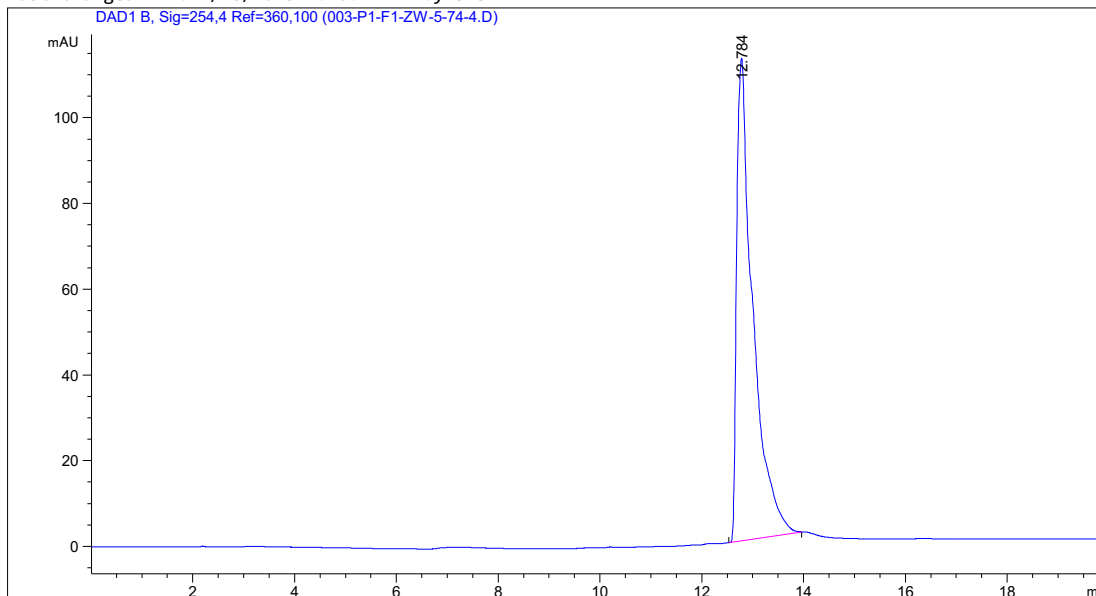

## Area Percent Report

```
Sorted By      : Signal
Multiplier     : 1.0000
Dilution       : 1.0000
Do not use Multiplier & Dilution Factor with ISTDs
```

Signal 1: DAD1 B, Sig=254,4 Ref=360,100

| Peak # | RetTime [min] | Type | Width [min] | Area [mAU*s] | Height [mAU] | Area %   |
|--------|---------------|------|-------------|--------------|--------------|----------|
| 1      | 12.784        | BB   | 0.3094      | 2480.26758   | 112.43984    | 100.0000 |

Totals :                    2480.26758  112.43984

\*\*\* End of Report \*\*\*

# Compound 56, condition A1.

Data File C:\Chem32\1\Data\Zhen\Zhen 2018-07-13 18-11-19\001-P1-F4-ZW-5-72-4.D  
Sample Name: ZW-5-72-4

```
=====
Acq. Operator   : SYSTEM                      Seq. Line :    1
Acq. Instrument : HPLC                       Location  : P1-F4
Injection Date  : 7/13/2018 6:14:57 PM       Inj       :    1
                                                Inj Volume: 20.000 µl
Sequence File   : C:\Chem32\1\Data\Zhen\Zhen 2018-07-13 18-11-19\Zhen.S
Method          : C:\Chem32\1\Data\Zhen\Zhen 2018-07-13 18-11-19\Zhen.M-2.M (Sequence Method)
Last changed    : 7/13/2018 6:11:20 PM by SYSTEM
=====
```

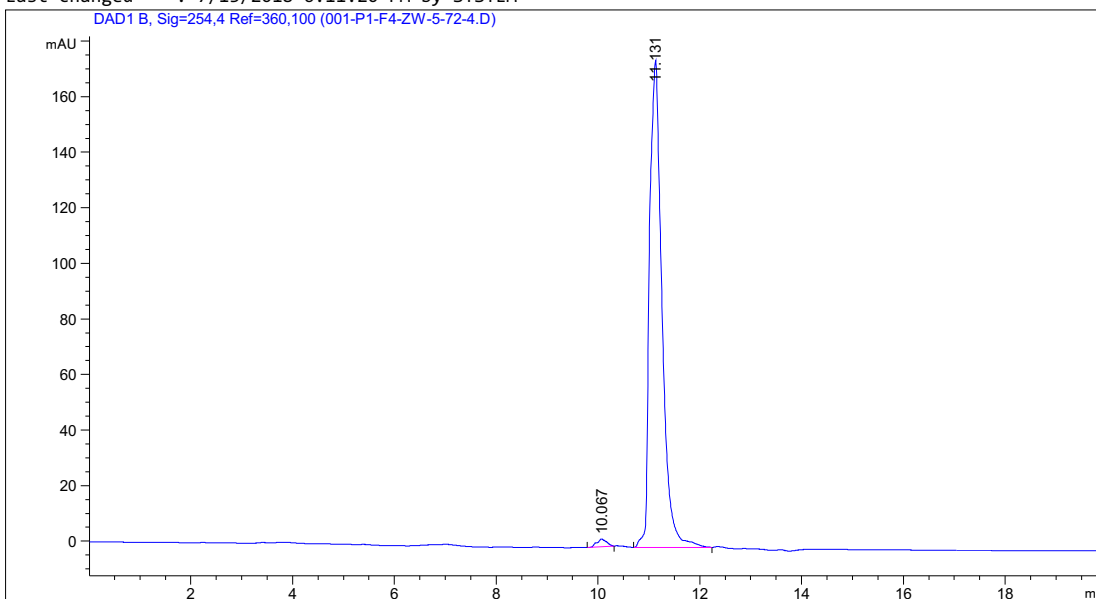

## Area Percent Report

```
Sorted By      : Signal
Multiplier     : 1.0000
Dilution       : 1.0000
Use Multiplier & Dilution Factor with ISTDs
```

Signal 1: DAD1 B, Sig=254,4 Ref=360,100

| Peak # | RetTime [min] | Type | Width [min] | Area [mAU*s] | Height [mAU] | Area %  |
|--------|---------------|------|-------------|--------------|--------------|---------|
| 1      | 10.067        | BB   | 0.1715      | 36.76062     | 2.83132      | 1.2274  |
| 2      | 11.131        | BB   | 0.2270      | 2958.34180   | 175.15872    | 98.7726 |

Totals :                    2995.10241 177.99004

\*\*\* End of Report \*\*\*

# Compound 56, condition B1.

Data File C:\Chem32\1\Data\Zhen\Zhen 2018-07-13 18-11-19\002-P1-F4-ZW-5-72-4.D  
 Sample Name: ZW-5-72-4

```

=====
Acq. Operator   : SYSTEM                      Seq. Line :    2
Acq. Instrument : HPLC                      Location  : P1-F4
Injection Date  : 7/13/2018 6:43:36 PM      Inj       :    1
                                           Inj Volume : 20.000 µl
Sequence File   : C:\Chem32\1\Data\Zhen\Zhen 2018-07-13 18-11-19\Zhen.S
Method          : C:\Chem32\1\Data\Zhen\Zhen 2018-07-13 18-11-19\Zhen_MeOH.M-2.M (Sequence
                  Method)
Last changed    : 7/13/2018 6:11:45 PM by SYSTEM
  
```

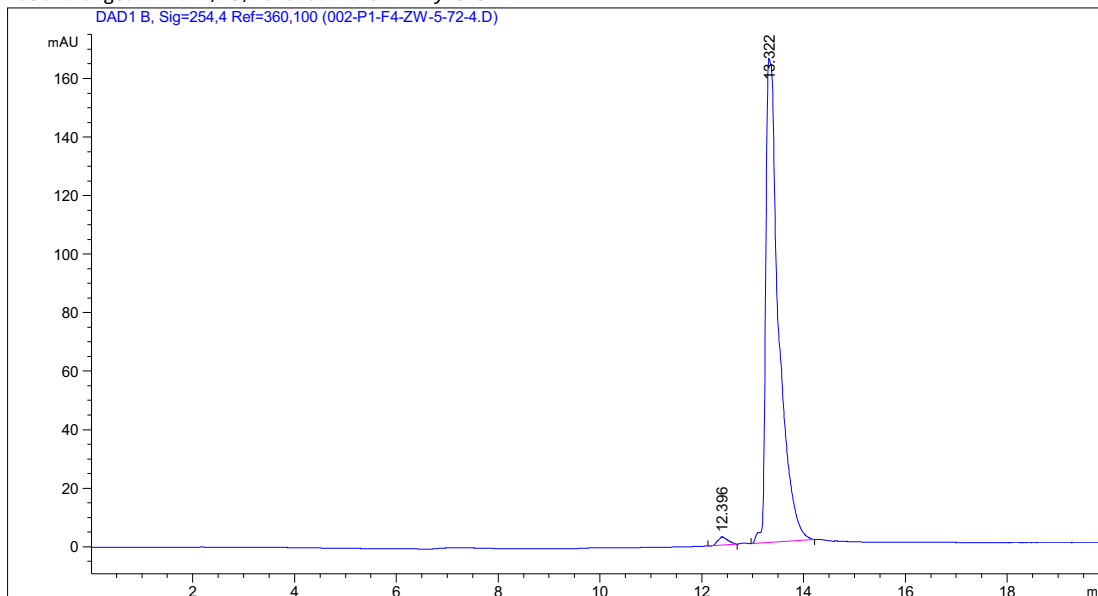

## Area Percent Report

```

Sorted By      : Signal
Multiplier     : 1.0000
Dilution       : 1.0000
Do not use Multiplier & Dilution Factor with ISTDs
  
```

Signal 1: DAD1 B, Sig=254,4 Ref=360,100

| Peak # | RetTime [min] | Type | Width [min] | Area [mAU*s] | Height [mAU] | Area %  |
|--------|---------------|------|-------------|--------------|--------------|---------|
| 1      | 12.396        | BB   | 0.1781      | 37.51956     | 2.80441      | 1.2655  |
| 2      | 13.322        | BB   | 0.2305      | 2927.27856   | 165.38649    | 98.7345 |

Totals :                     2964.79812   168.19090

\*\*\* End of Report \*\*\*



# Compound 57, condition A1.

Data File C:\Chem32\1\Data\Zhen\Zhen 2018-04-18 11-22-28\001-P1-F1-ZW-5-58-4.D  
Sample Name: ZW-5-58-4

```
=====
Acq. Operator   : SYSTEM                      Seq. Line :    1
Acq. Instrument : HPLC                       Location  : P1-F1
Injection Date  : 4/18/2018 11:25:58 AM      Inj       :    1
                                           Inj Volume: 20.000 µl
Sequence File   : C:\Chem32\1\Data\Zhen\Zhen 2018-04-18 11-22-28\Zhen.S
Method          : C:\Chem32\1\Data\Zhen\Zhen 2018-04-18 11-22-28\Zhen.M-2.M (Sequence Method)
Last changed    : 4/18/2018 11:22:28 AM by SYSTEM
=====
```

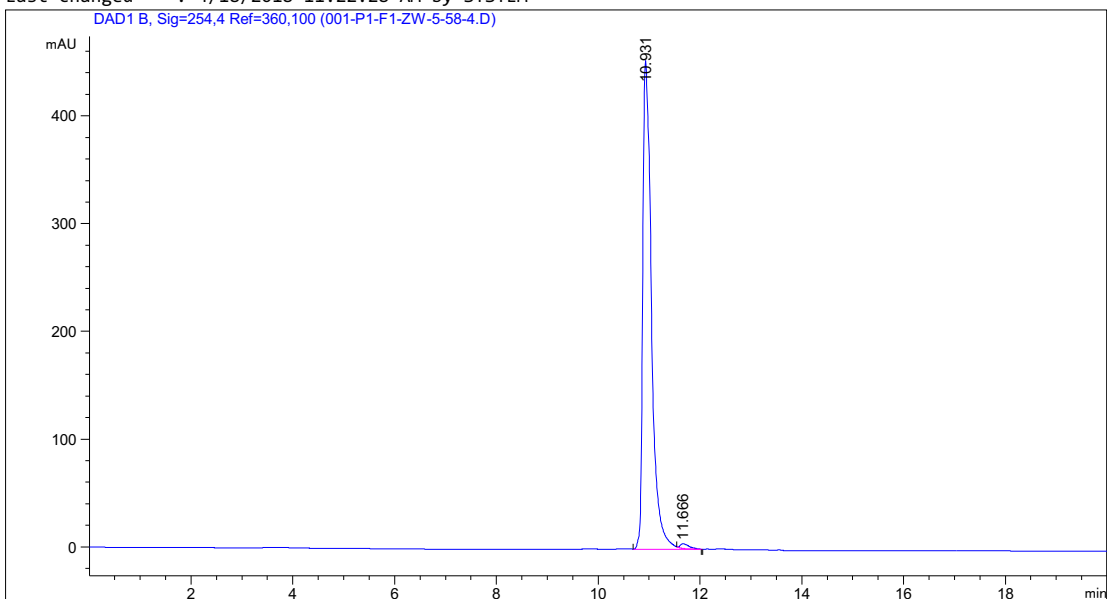

## Area Percent Report

```
Sorted By      : Signal
Multiplier     : 1.0000
Dilution       : 1.0000
Use Multiplier & Dilution Factor with ISTDs
```

Signal 1: DAD1 B, Sig=254,4 Ref=360,100

| Peak # | RetTime [min] | Type | Width [min] | Area [mAU*s] | Height [mAU] | Area %  |
|--------|---------------|------|-------------|--------------|--------------|---------|
| 1      | 10.931        | BV R | 0.1650      | 5406.46191   | 453.77237    | 99.0072 |
| 2      | 11.666        | VB E | 0.1705      | 54.21277     | 4.37616      | 0.9928  |

Totals :                    5460.67468  458.14853

\*\*\* End of Report \*\*\*

# Compound 57, condition B1.

Data File C:\Chem32\1\Data\Zhen\Zhen 2018-04-18 11-22-28\002-P1-F1-ZW-5-58-4.D

Sample Name: ZW-5-58-4

```
=====
Acq. Operator   : SYSTEM                      Seq. Line :    2
Acq. Instrument : HPLC                      Location  : P1-F1
Injection Date  : 4/18/2018 11:54:37 AM      Inj       :    1
                                           Inj Volume: 20.000 µl
Sequence File   : C:\Chem32\1\Data\Zhen\Zhen 2018-04-18 11-22-28\Zhen.S
Method          : C:\Chem32\1\Data\Zhen\Zhen 2018-04-18 11-22-28\Zhen_MeOH.M-2.M (Sequence
Method)
Last changed    : 4/18/2018 11:44:18 AM by SYSTEM
=====
```

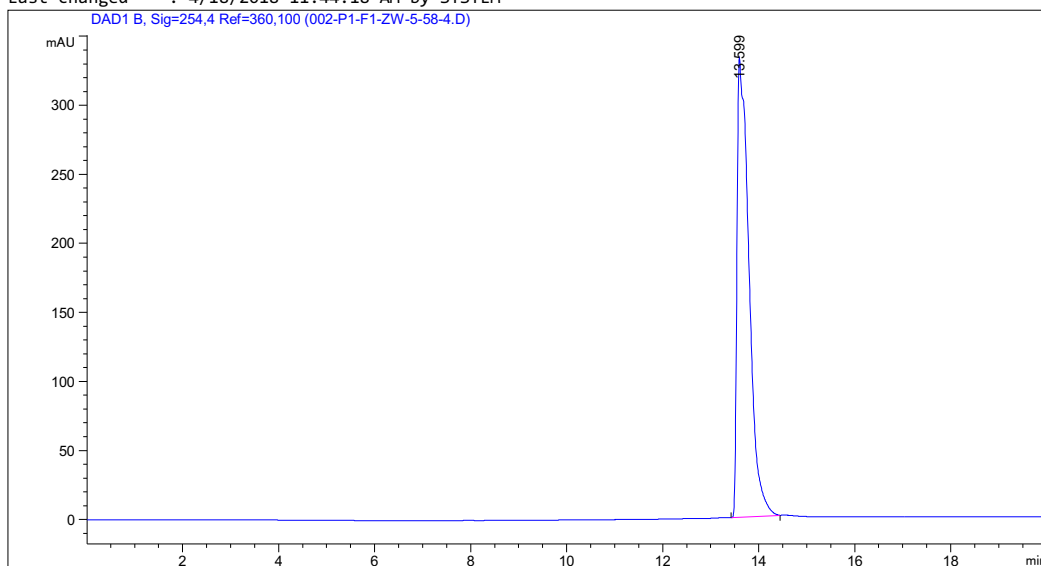

## Area Percent Report

```
=====
Sorted By      : Signal
Multiplier     : 1.0000
Dilution       : 1.0000
Do not use Multiplier & Dilution Factor with ISTDs
=====
```

Signal 1: DAD1 B, Sig=254,4 Ref=360,100

| Peak # | RetTime [min] | Type | Width [min] | Area [mAU*s] | Height [mAU] | Area %   |
|--------|---------------|------|-------------|--------------|--------------|----------|
| 1      | 13.599        | BB   | 0.2259      | 5754.13232   | 332.48322    | 100.0000 |

Totals : 5754.13232 332.48322

```
=====
*** End of Report ***
=====
```

# Compound 4, condition A1.

Data File C:\Chem32\1\Data\Zhen\Zhen 2018-12-25 09-18-39\001-P1-D1-ZW-5-6-4.D

Sample Name: ZW-5-6-4

```
=====
Acq. Operator   : SYSTEM                      Seq. Line :    1
Acq. Instrument : HPLC                      Location  : P1-D1
Injection Date  : 12/25/2018 9:25:09 AM      Inj       :    1
                                           Inj Volume: 20.000 µl
Method          : C:\Chem32\1\Data\Zhen\Zhen 2018-12-25 09-18-39\Zhen.M-2.M (Sequence Method)
Last changed    : 12/25/2018 9:18:40 AM by SYSTEM
=====
```

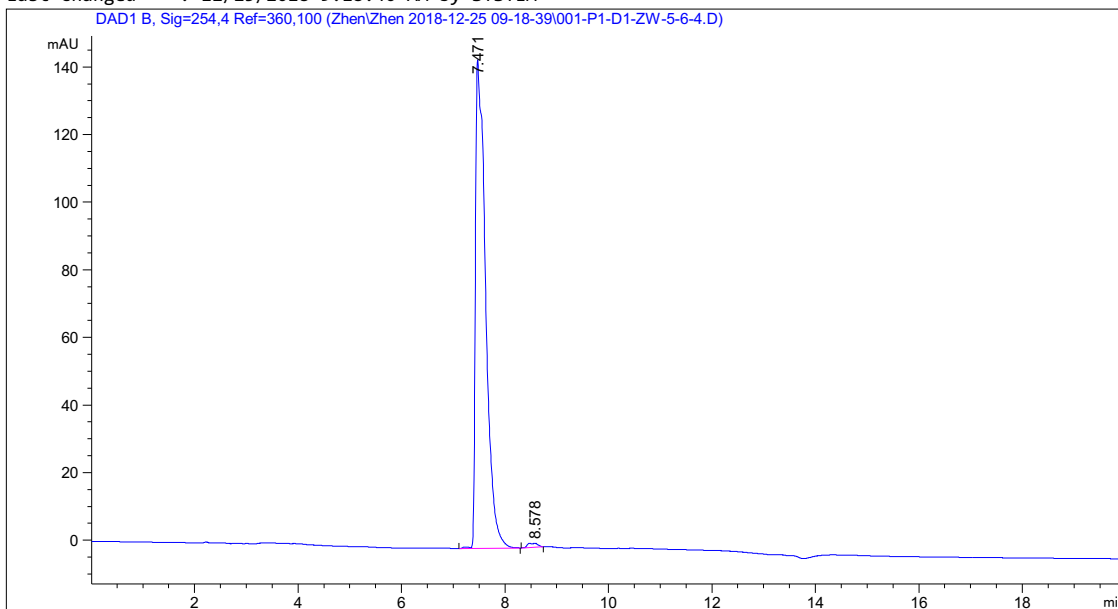

## Area Percent Report

```
Sorted By      : Signal
Multiplier     : 1.0000
Dilution       : 1.0000
Use Multiplier & Dilution Factor with ISTDs
```

Signal 1: DAD1 B, Sig=254,4 Ref=360,100

| Peak # | RetTime [min] | Type | Width [min] | Area [mAU*s] | Height [mAU] | Area %  |
|--------|---------------|------|-------------|--------------|--------------|---------|
| 1      | 7.471         | BB   | 0.1788      | 1965.25171   | 144.38025    | 99.2124 |
| 2      | 8.578         | BB   | 0.1819      | 15.60179     | 1.13865      | 0.7876  |

Totals : 1980.85350 145.51890

\*\*\* End of Report \*\*\*

# Compound 9, condition A1.

Data File C:\Chem32\1\Data\Zhen\Zhen 2017-05-16 15-49-16\001-P1-D1-ZW-2-96.D  
Sample Name: ZW-2-96

```
=====
Acq. Operator   : SYSTEM                      Seq. Line :    1
Acq. Instrument : HPLC                      Location  : P1-D1
Injection Date  : 5/16/2017 3:53:44 PM      Inj       :    1
                                           Inj Volume: 20.000 µl
Method         : C:\Chem32\1\Data\Zhen\Zhen 2017-05-16 15-49-16\Zhen.M (Sequence Method)
Last changed   : 5/16/2017 3:49:16 PM by SYSTEM
=====
```

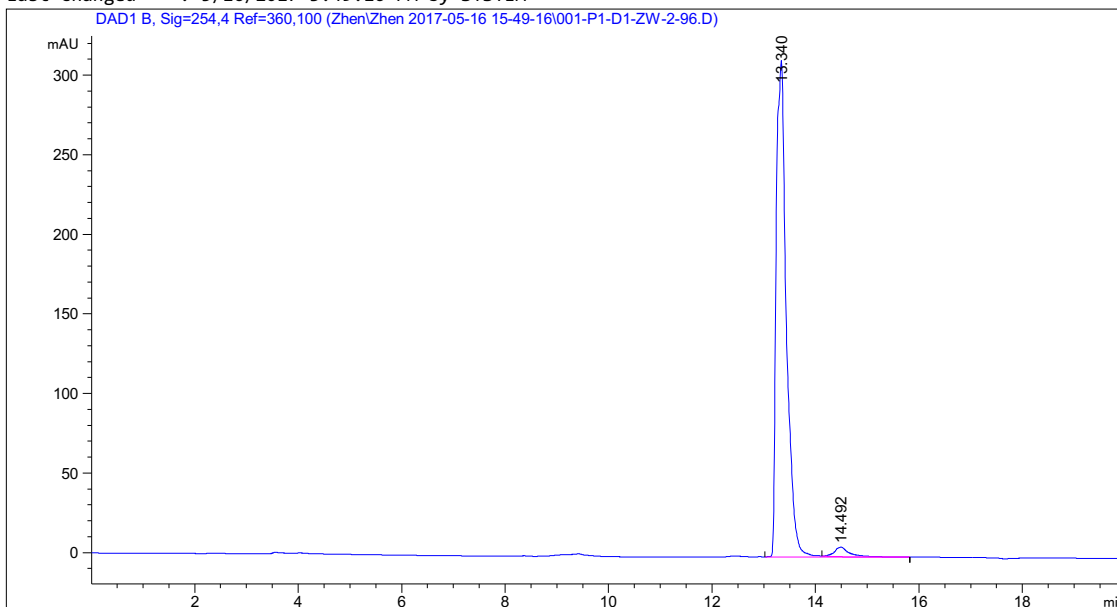

## Area Percent Report

```
Sorted By      : Signal
Multiplier     : 1.0000
Dilution       : 1.0000
Use Multiplier & Dilution Factor with ISTDs
```

Signal 1: DAD1 B, Sig=254,4 Ref=360,100

| Peak # | RetTime [min] | Type | Width [min] | Area [mAU*s] | Height [mAU] | Area %  |
|--------|---------------|------|-------------|--------------|--------------|---------|
| 1      | 13.340        | BV R | 0.1785      | 4240.89209   | 312.07471    | 97.0886 |
| 2      | 14.492        | VB E | 0.3019      | 127.17232    | 6.03380      | 2.9114  |

Totals :                    4368.06441  318.10851

\*\*\* End of Report \*\*\*

## Compound (Et)-15, condition A1.

Data File C:\Chem32\1\Data\Zhen\Zhen 2019-01-20 15-43-12\001-P1-F1-ZW-5-91.D  
 Sample Name: ZW-5-91

```

=====
Acq. Operator   : SYSTEM                               Seq. Line :    1
Acq. Instrument : HPLC                               Location  : P1-F1
Injection Date  : 1/20/2019 3:49:44 PM                Inj       :    1
                                                    Inj Volume: 80.000 µl
Different Inj Volume from Sample Entry! Actual Inj Volume : 20.000 µl
Method          : C:\Chem32\1\Data\Zhen\Zhen 2019-01-20 15-43-12\Zhen.M (Sequence Method)
Last changed    : 1/20/2019 3:43:12 PM by SYSTEM
  
```

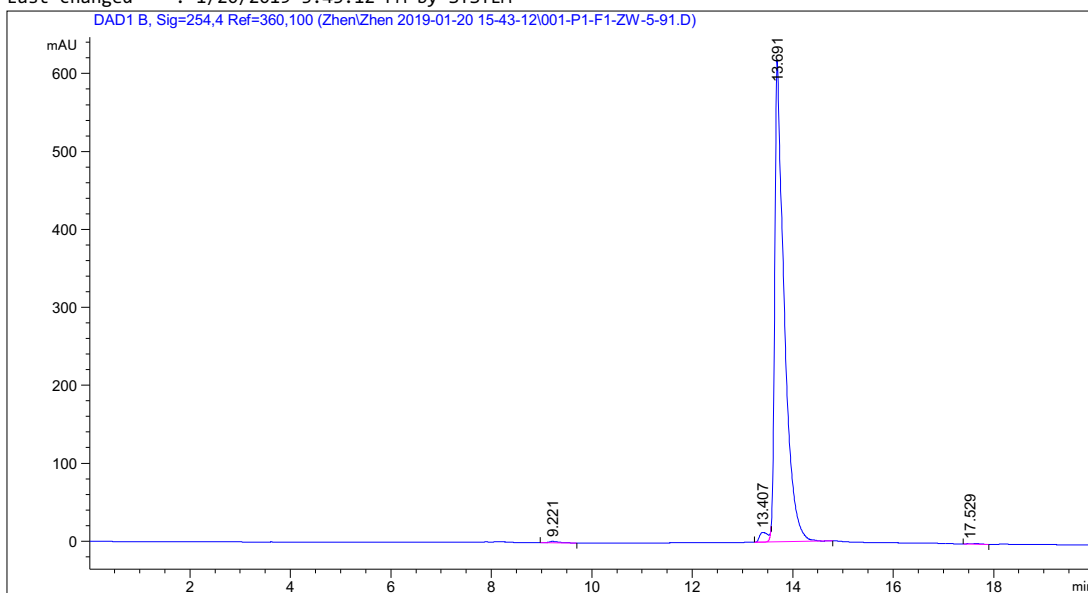

### Area Percent Report

```

=====
Sorted By      : Signal
Multiplier     : 1.0000
Dilution       : 1.0000
Use Multiplier & Dilution Factor with ISTDs
  
```

Signal 1: DAD1 B, Sig=254,4 Ref=360,100

| Peak # | RetTime [min] | Type | Width [min] | Area [mAU*s] | Height [mAU] | Area %  |
|--------|---------------|------|-------------|--------------|--------------|---------|
| 1      | 9.221         | BB   | 0.2021      | 24.24774     | 1.74552      | 0.2924  |
| 2      | 13.407        | BV E | 0.1805      | 140.65938    | 12.57143     | 1.6963  |
| 3      | 13.691        | VV R | 0.1752      | 8108.86035   | 617.41132    | 97.7916 |
| 4      | 17.529        | BB   | 0.1914      | 18.21508     | 1.31701      | 0.2197  |

Totals :                      8291.98256   633.04528

\*\*\* End of Report \*\*\*

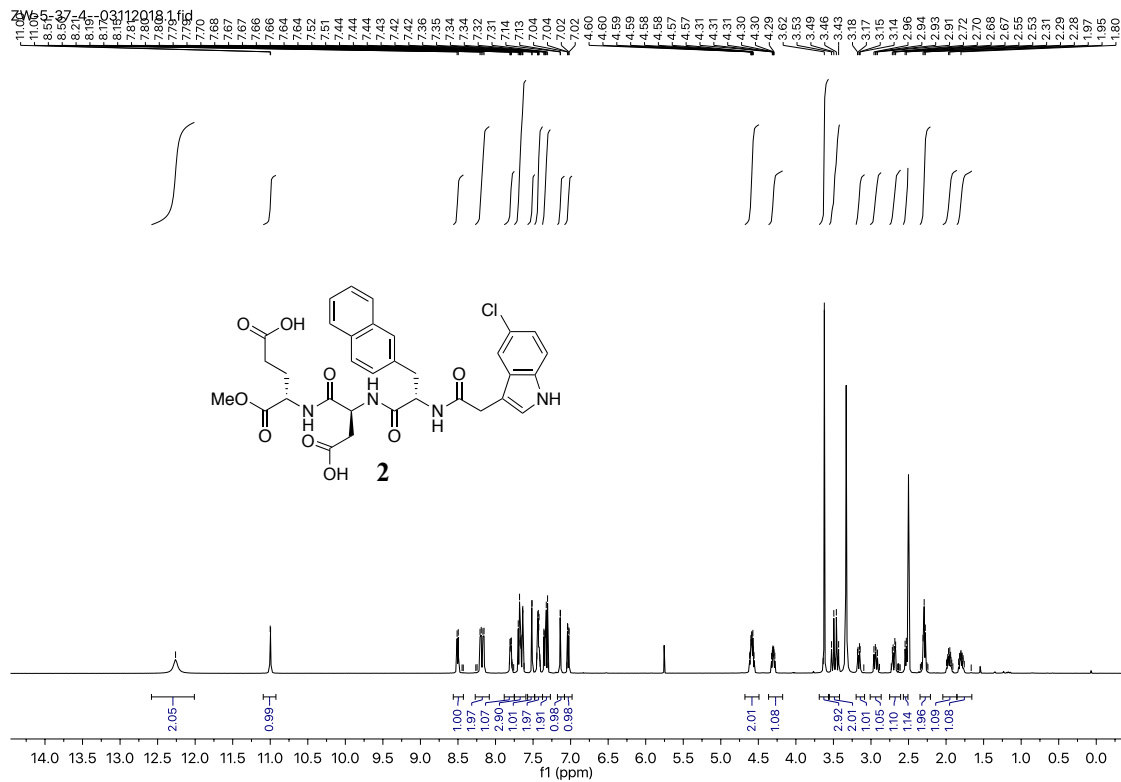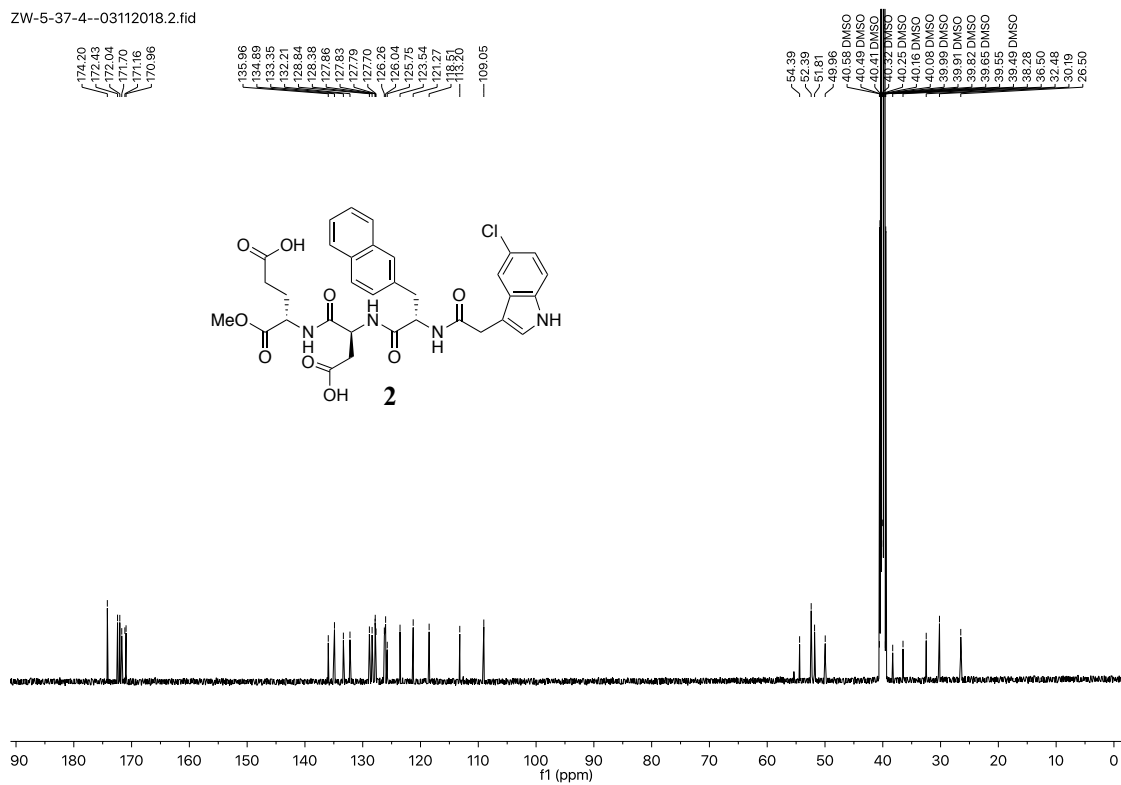

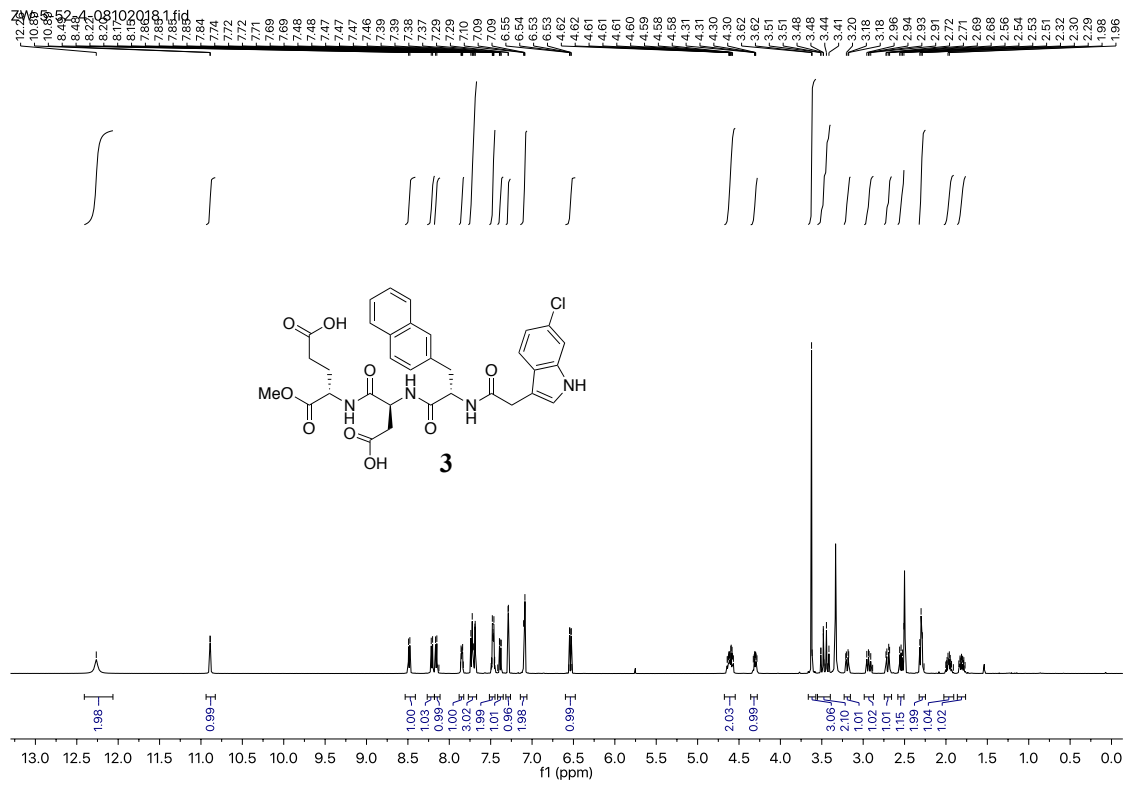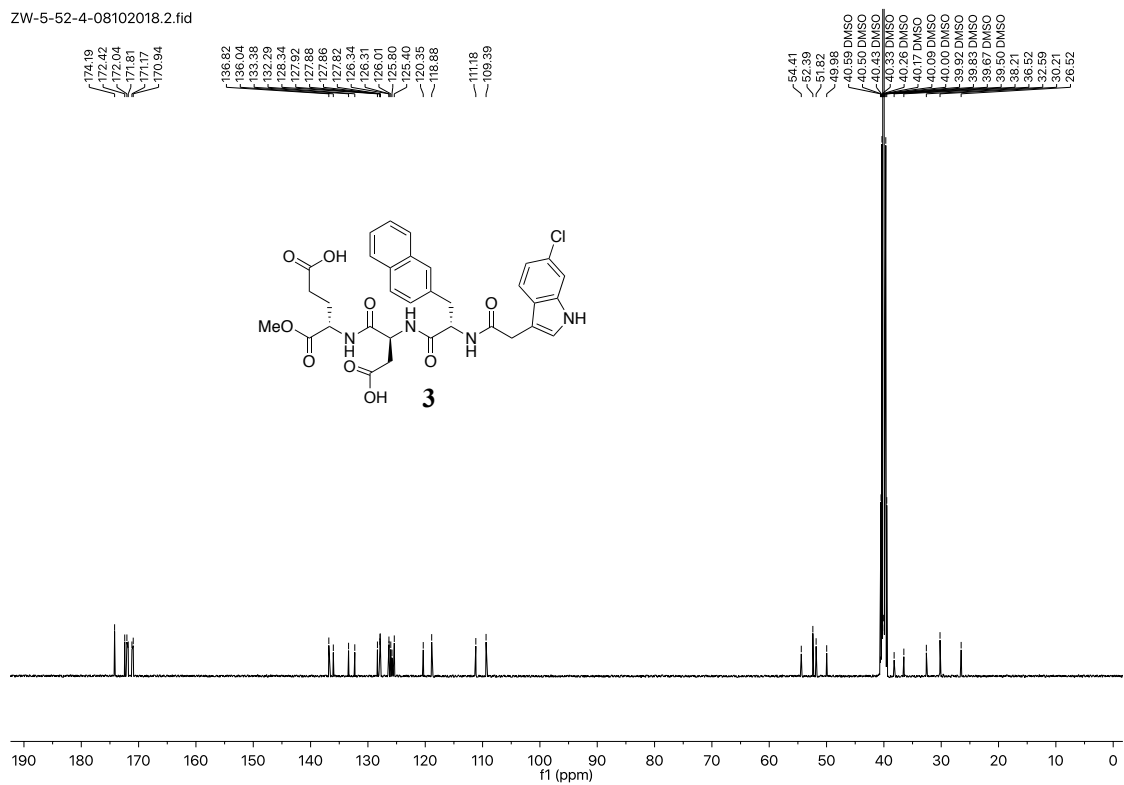

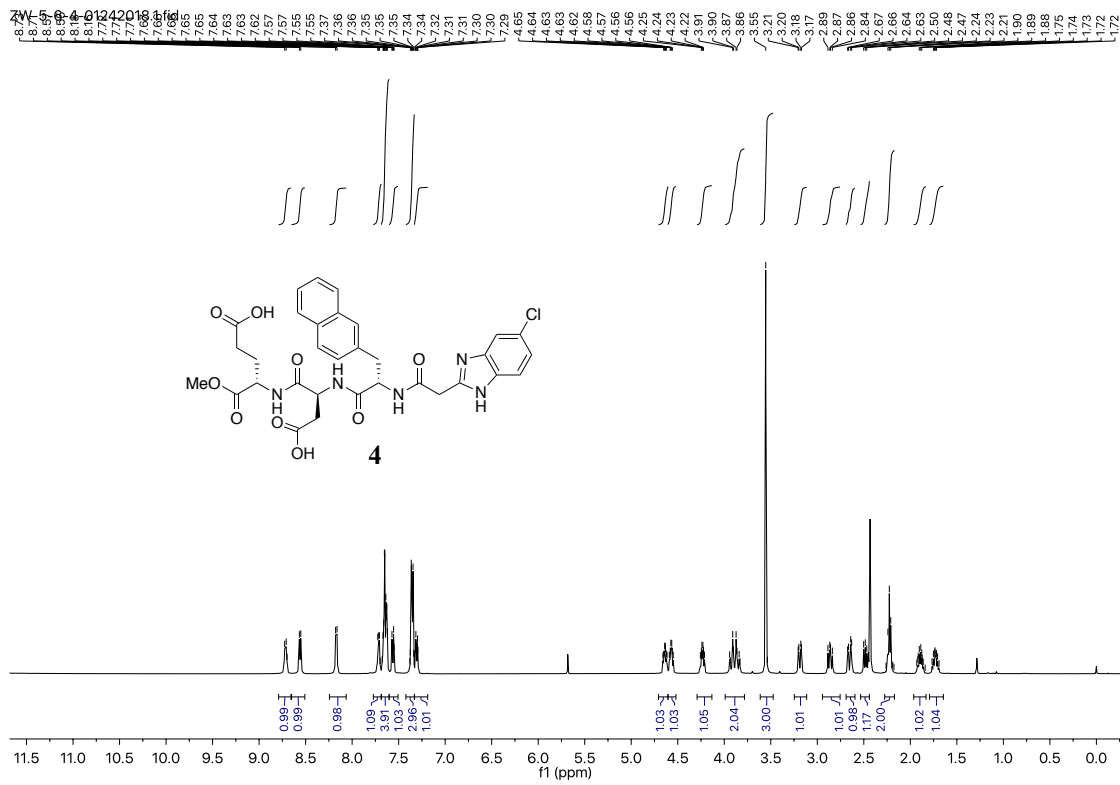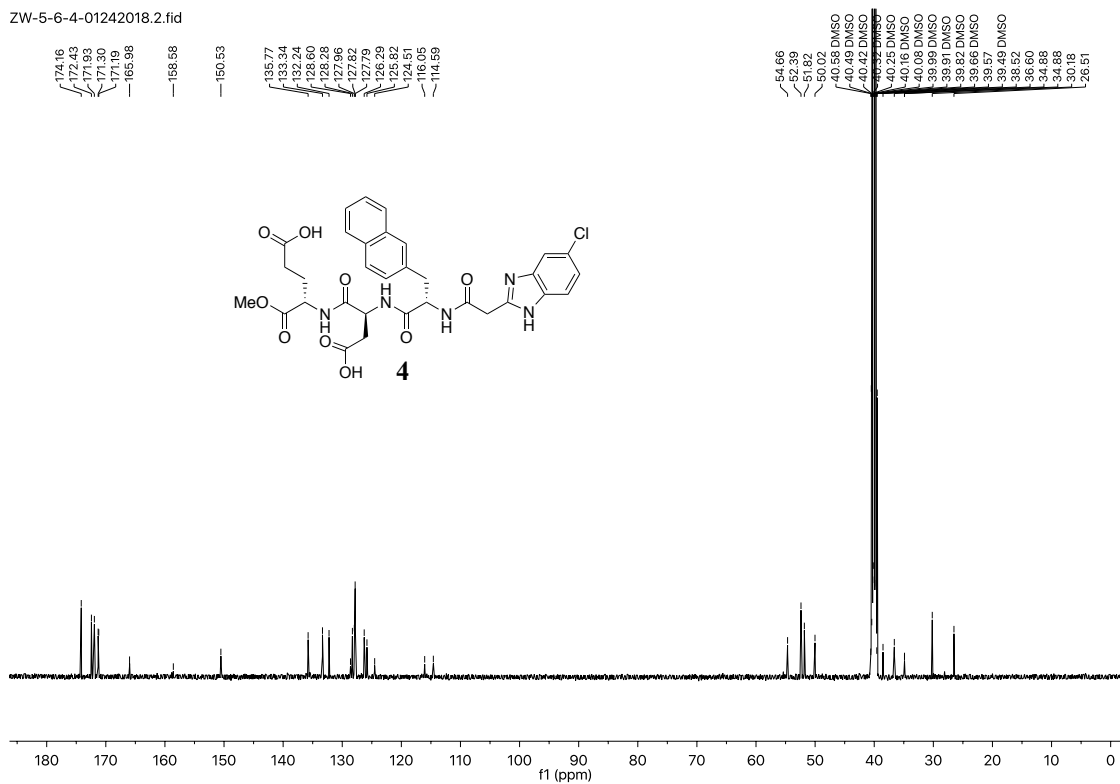



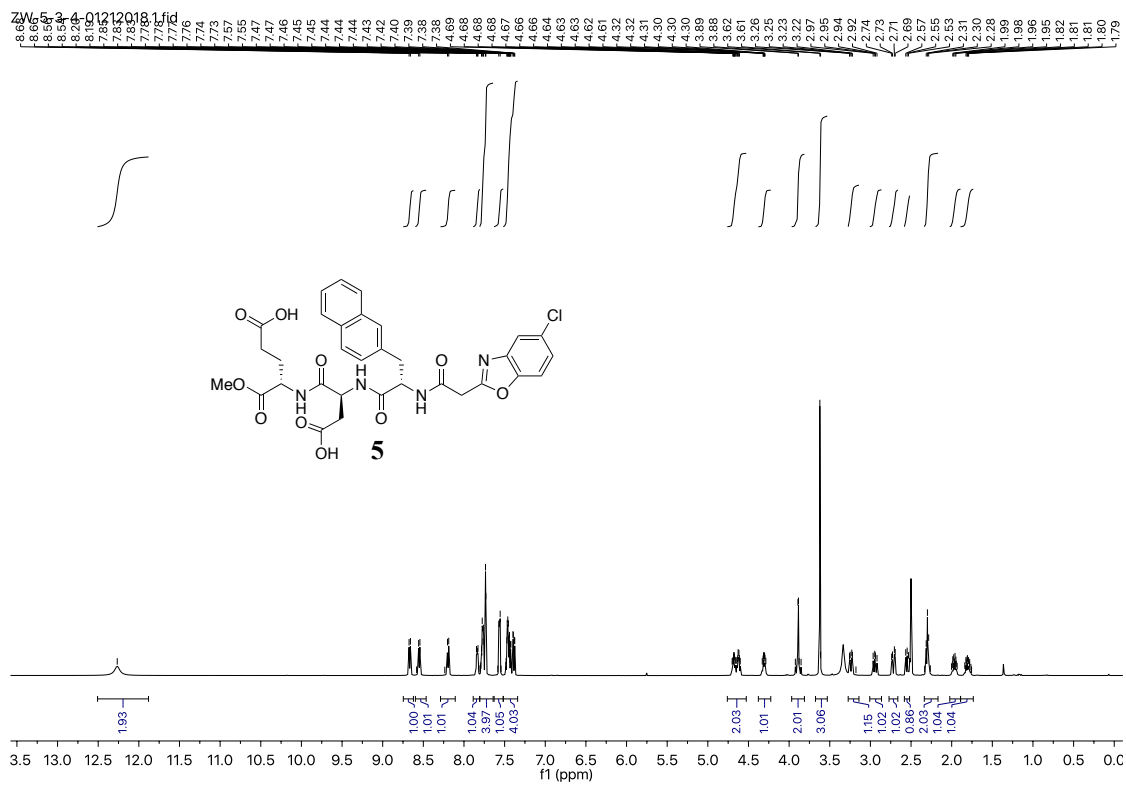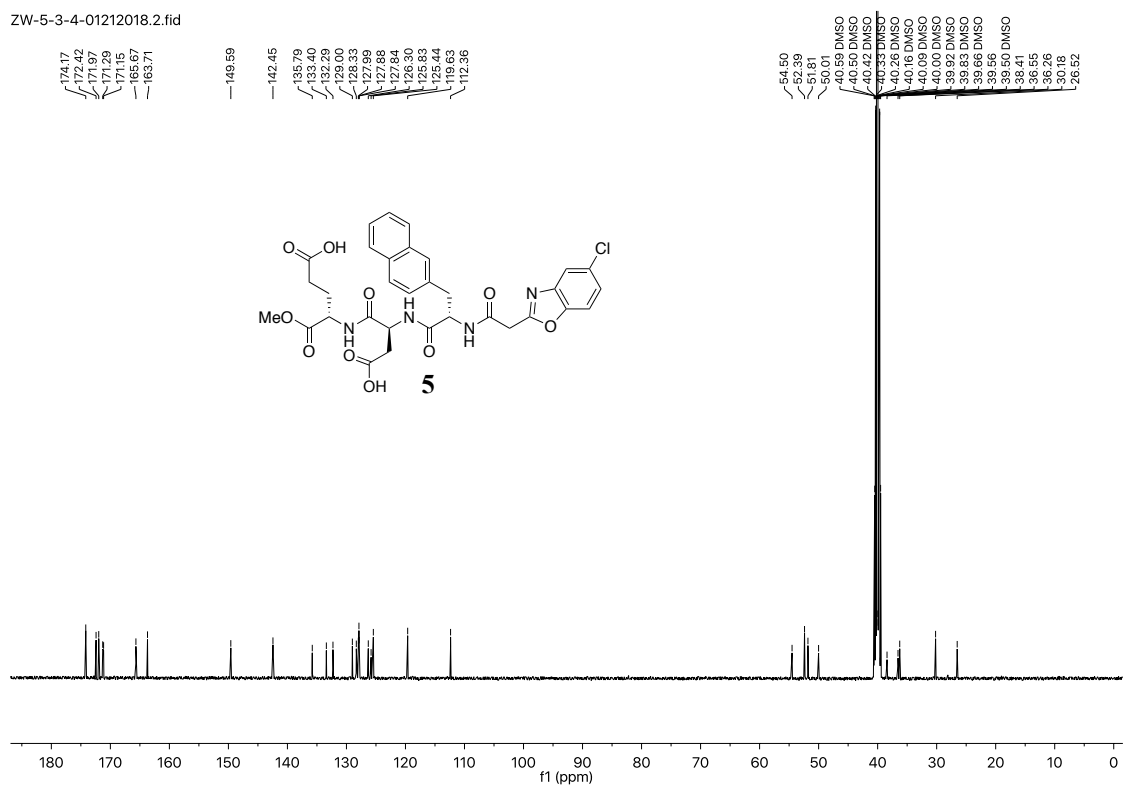

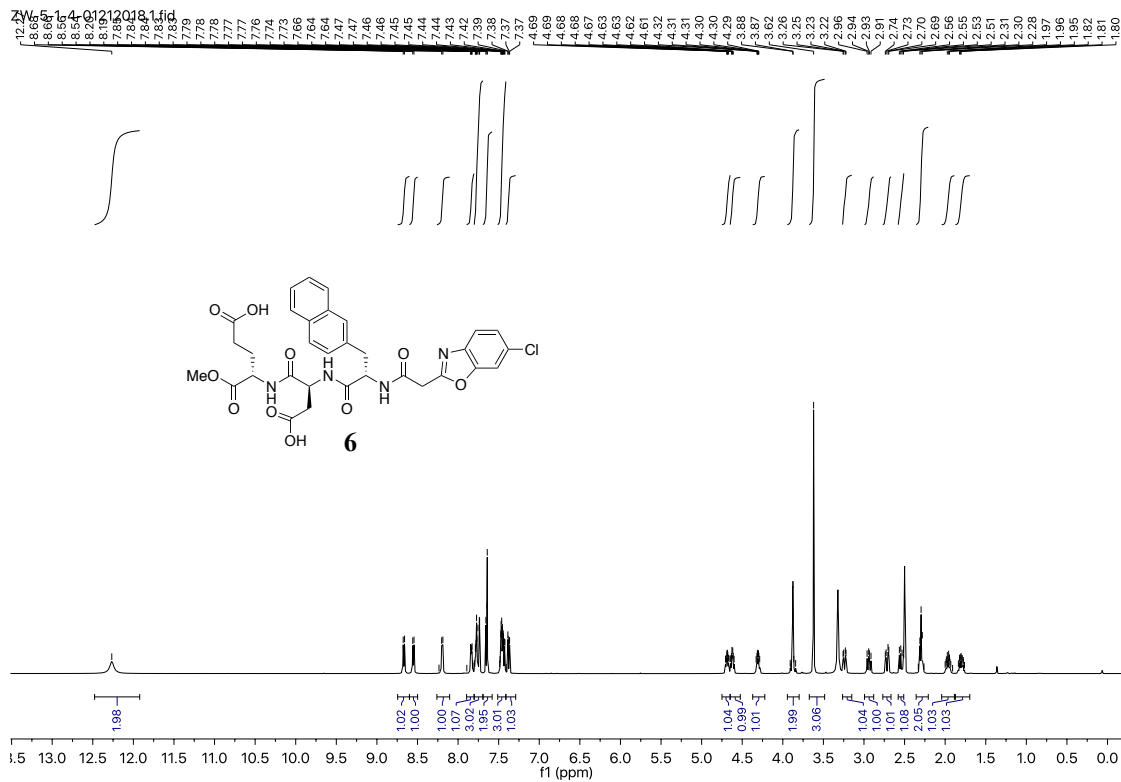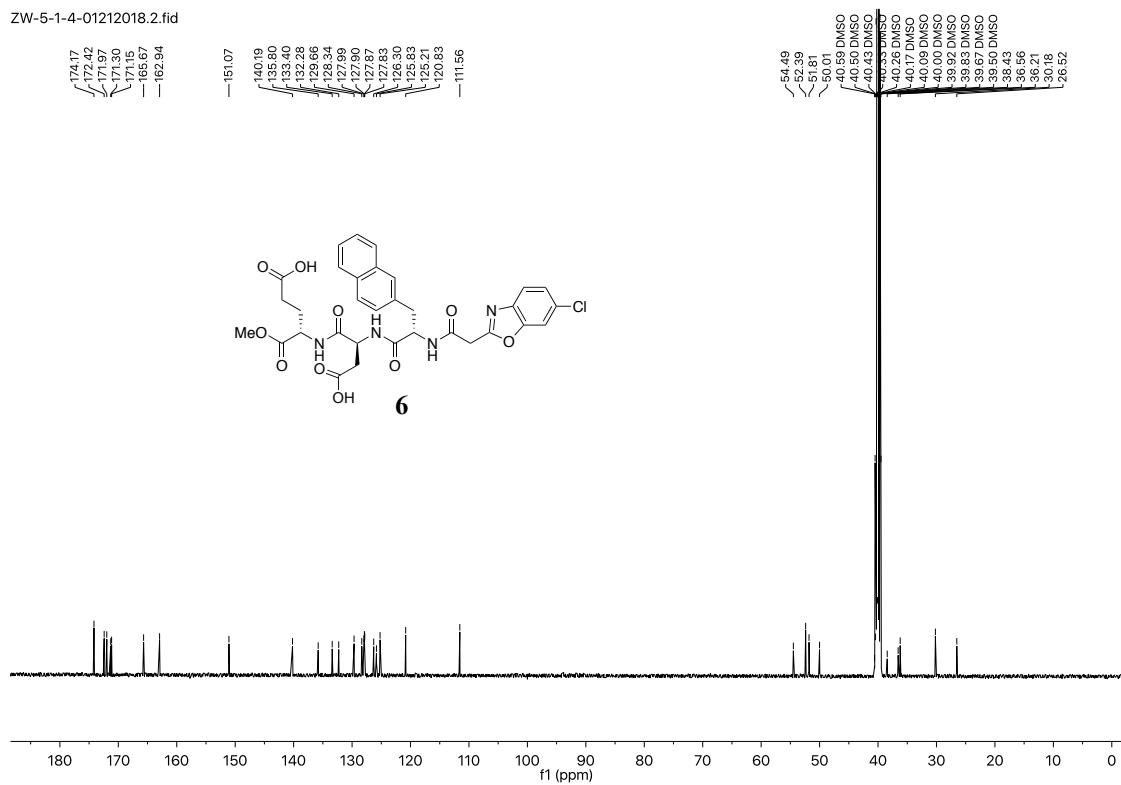

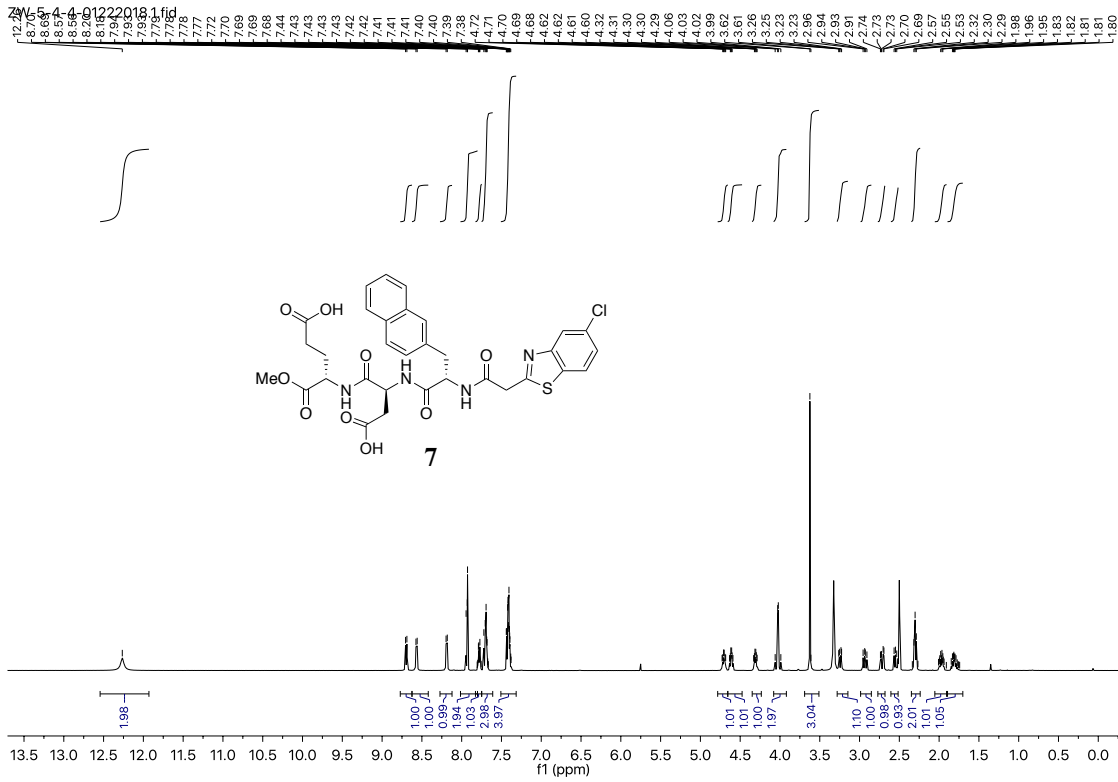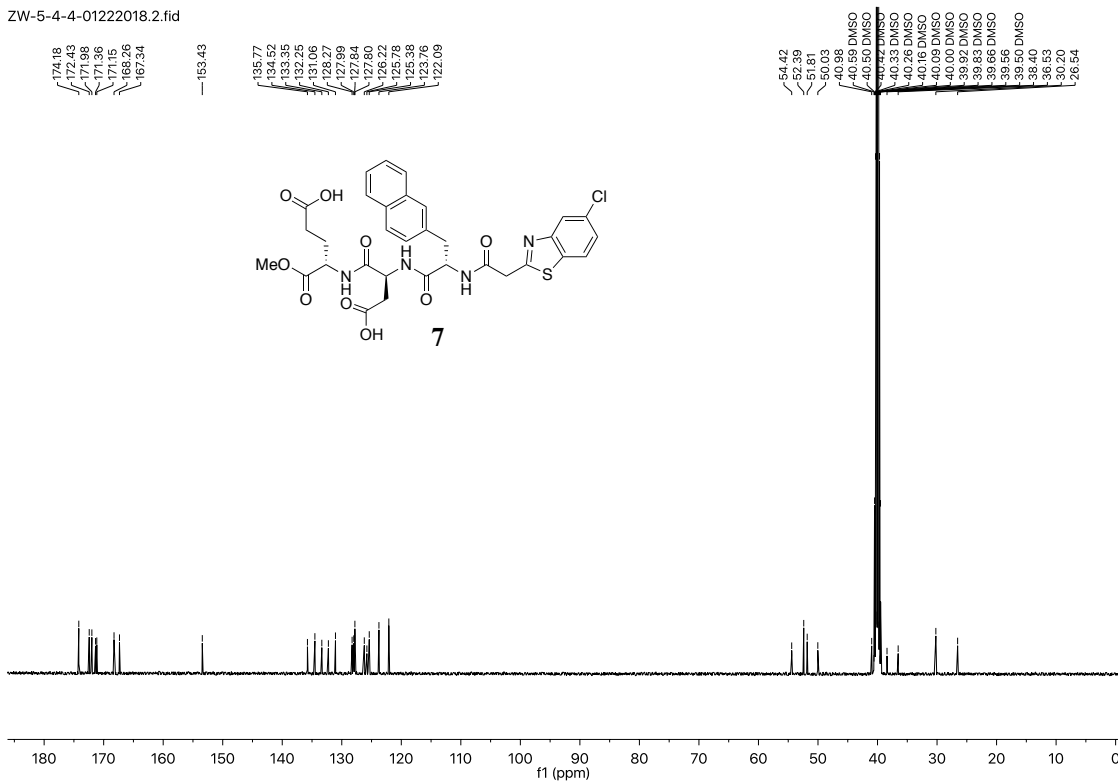

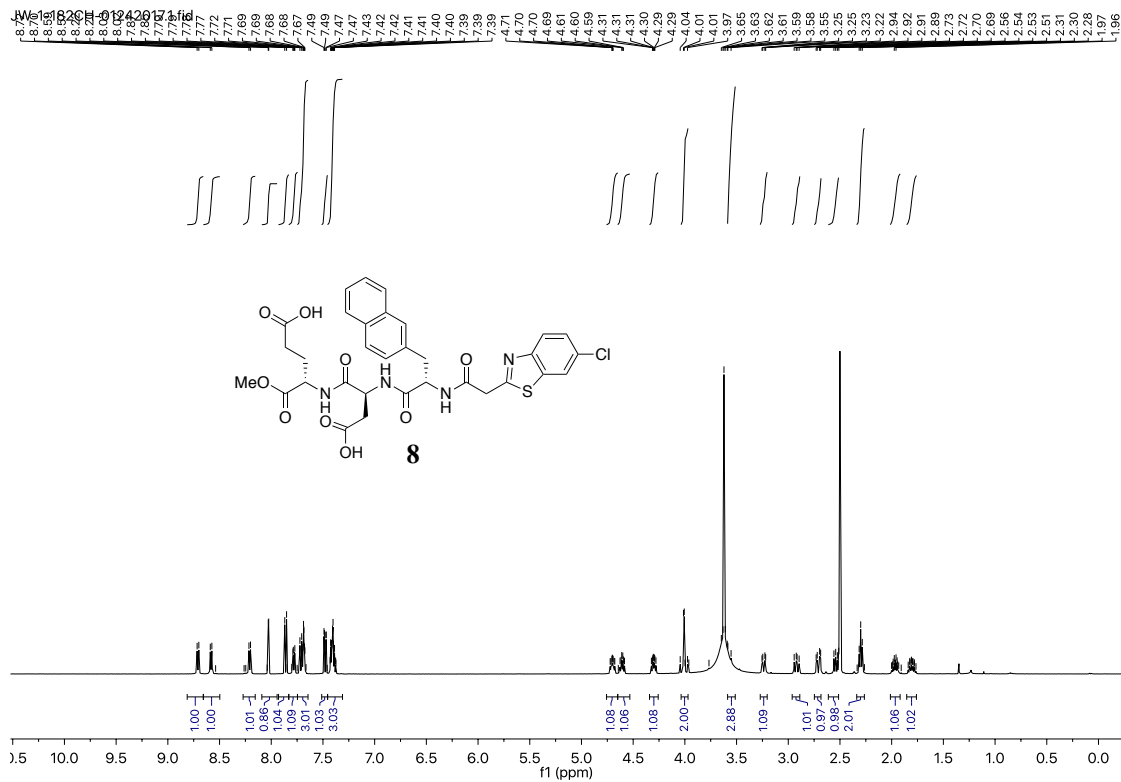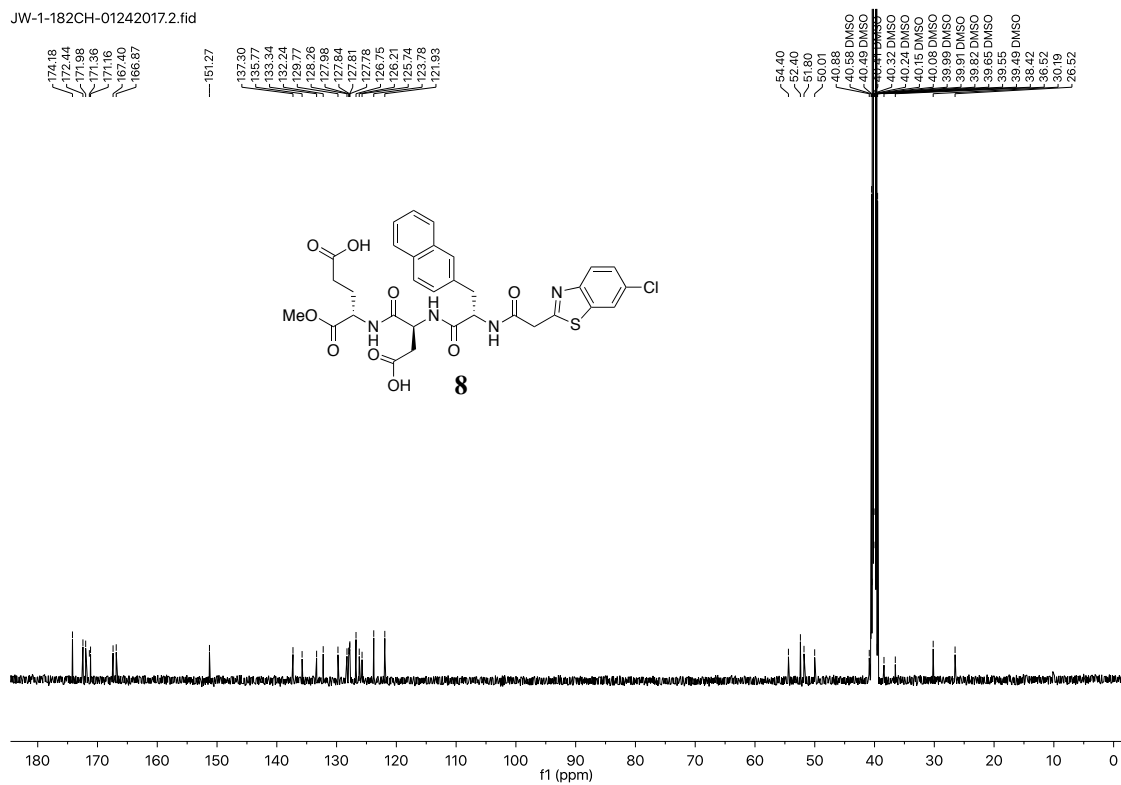

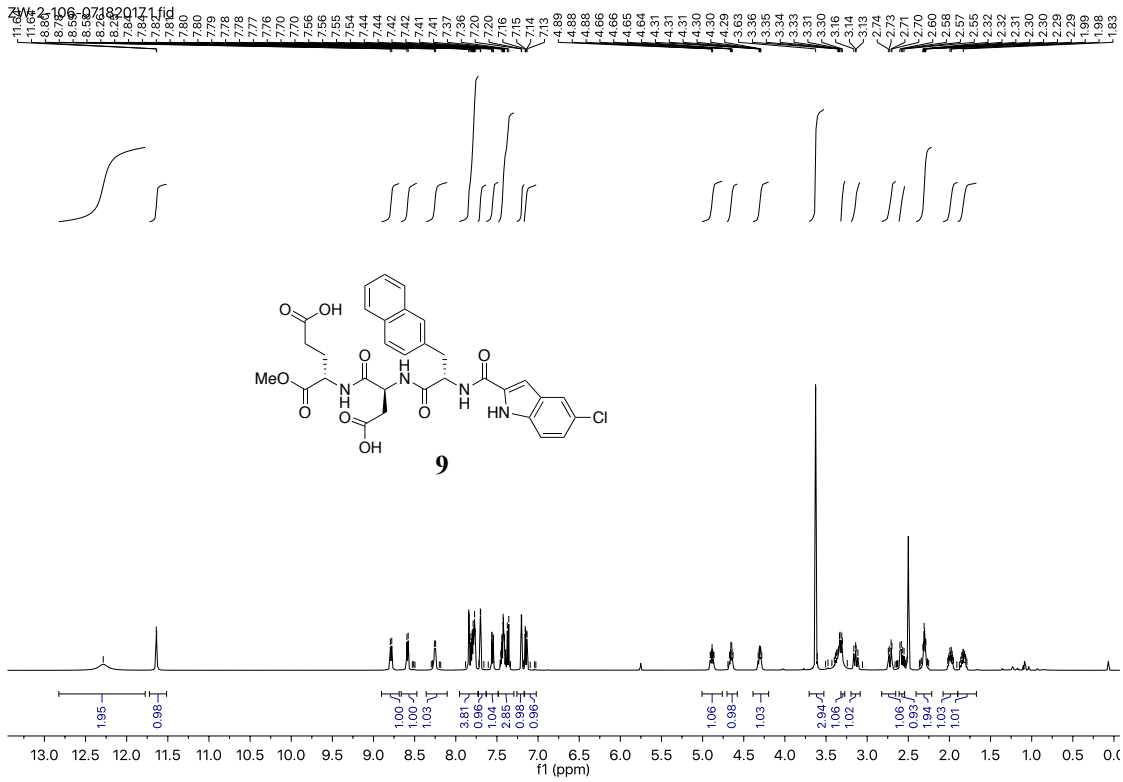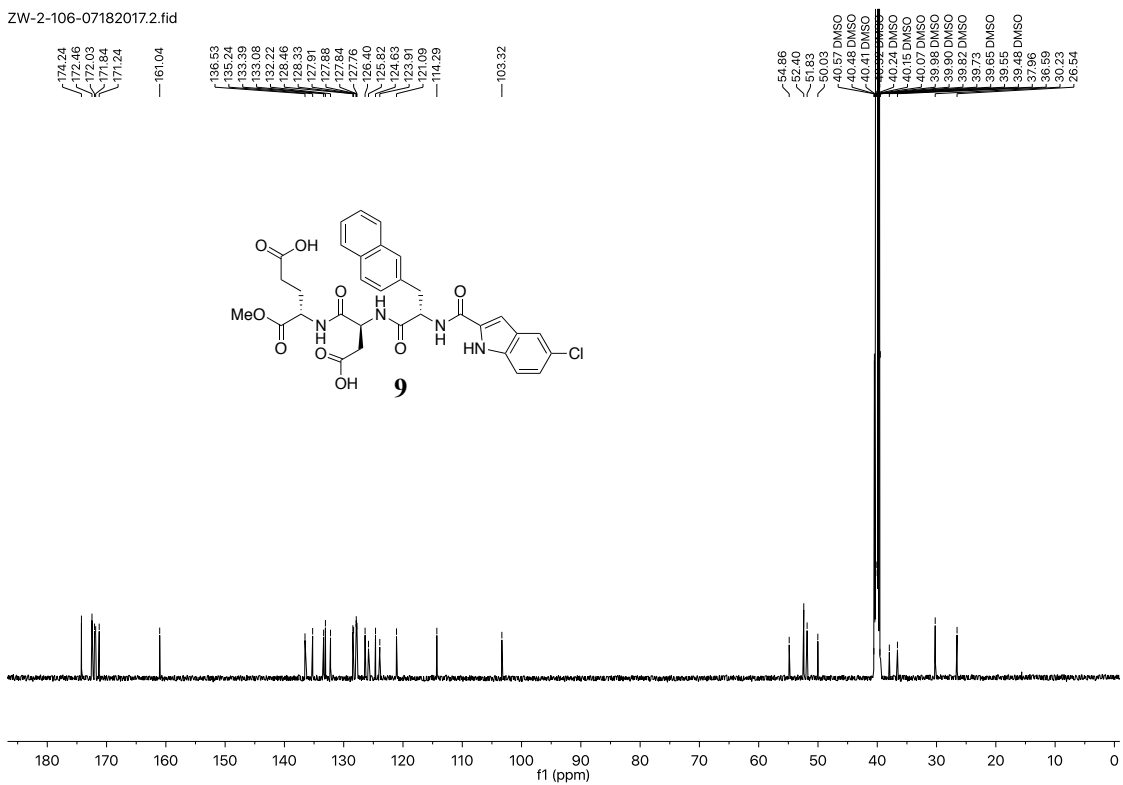

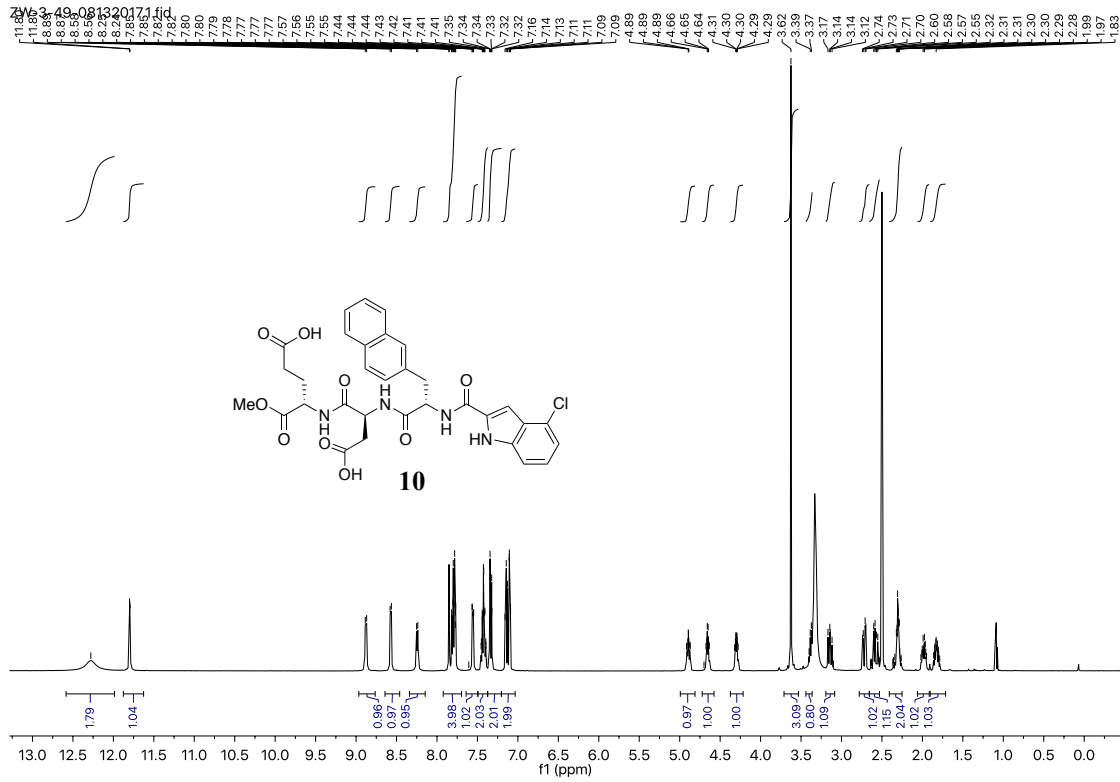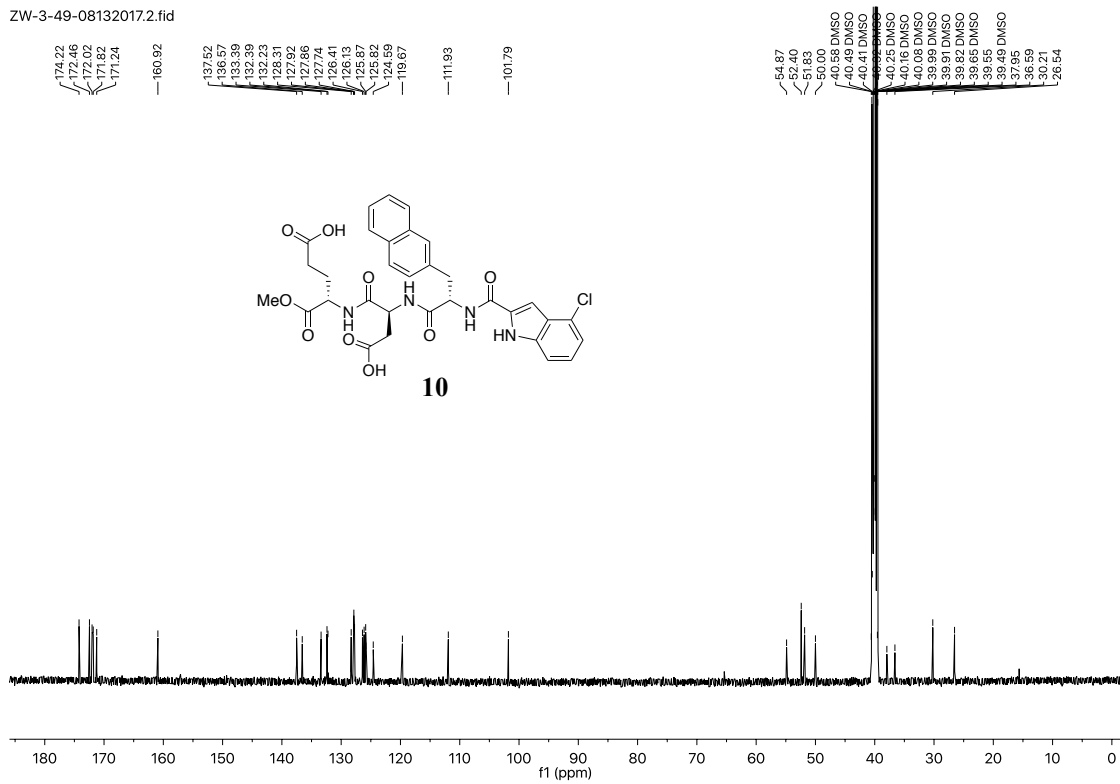

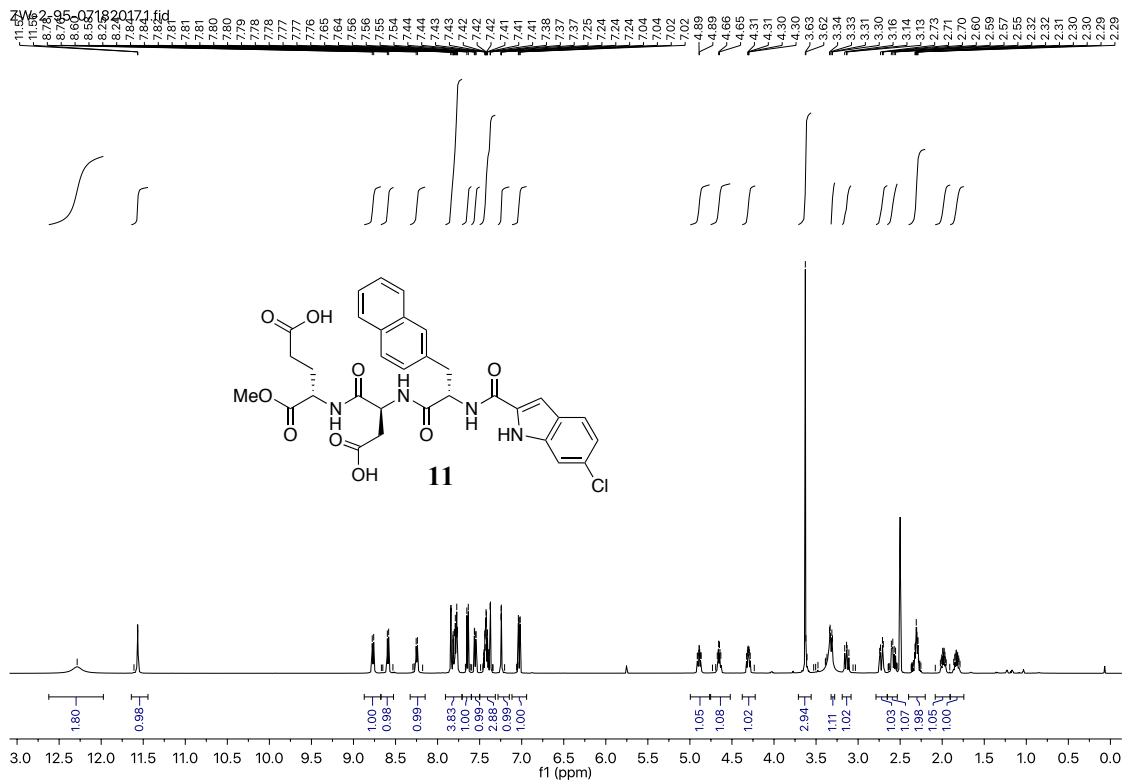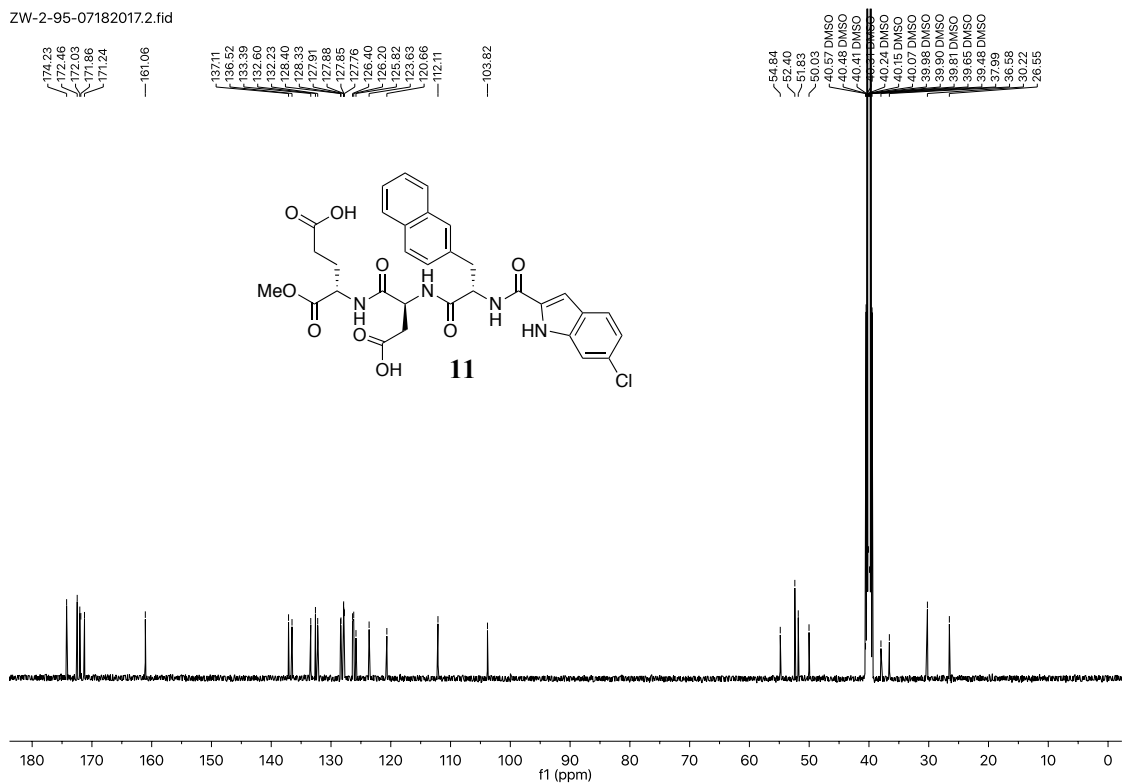

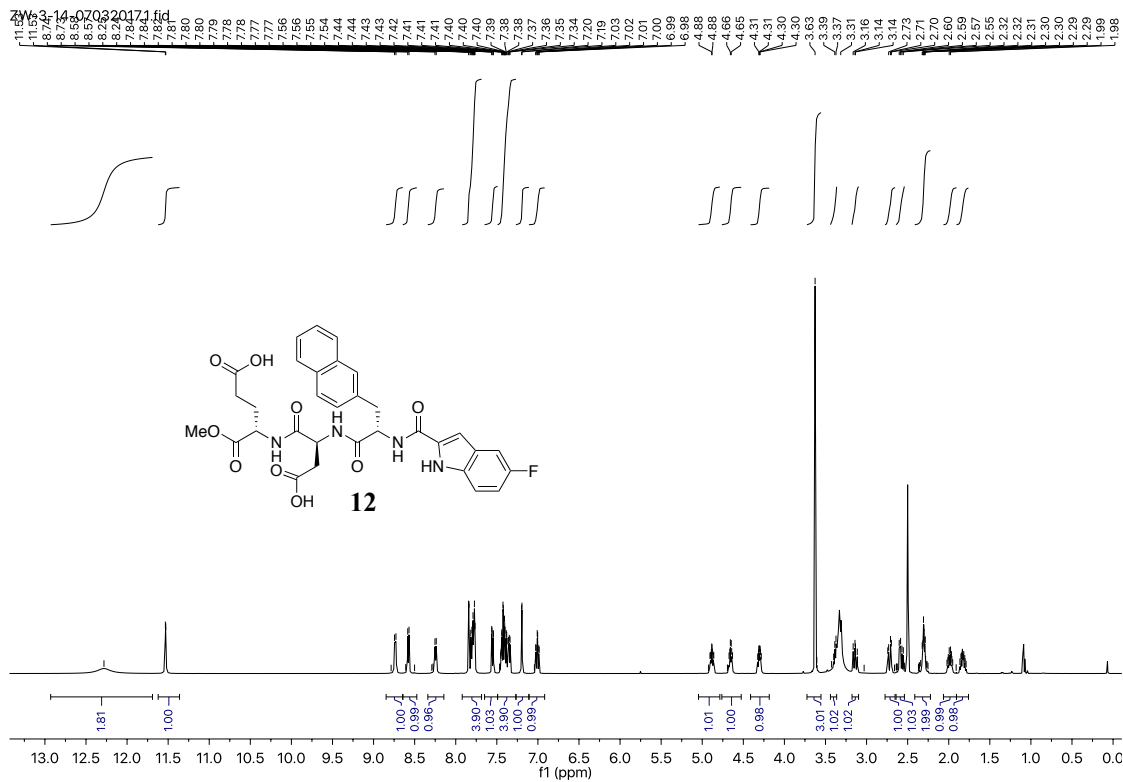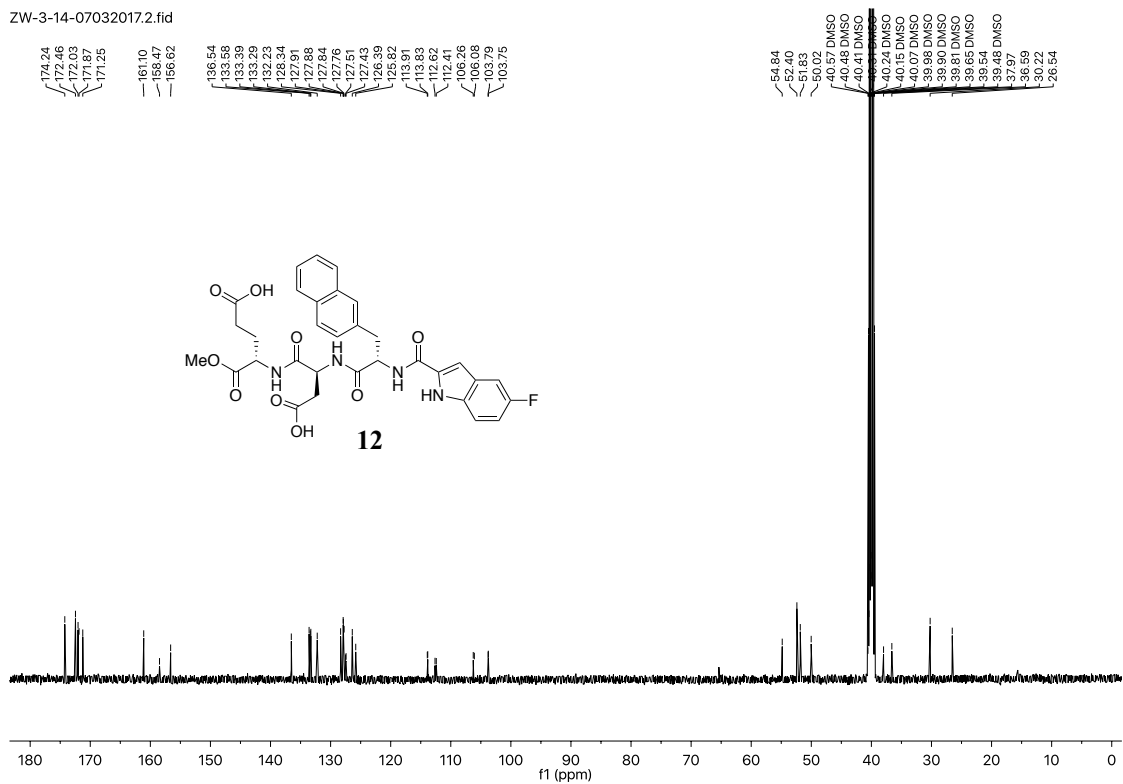



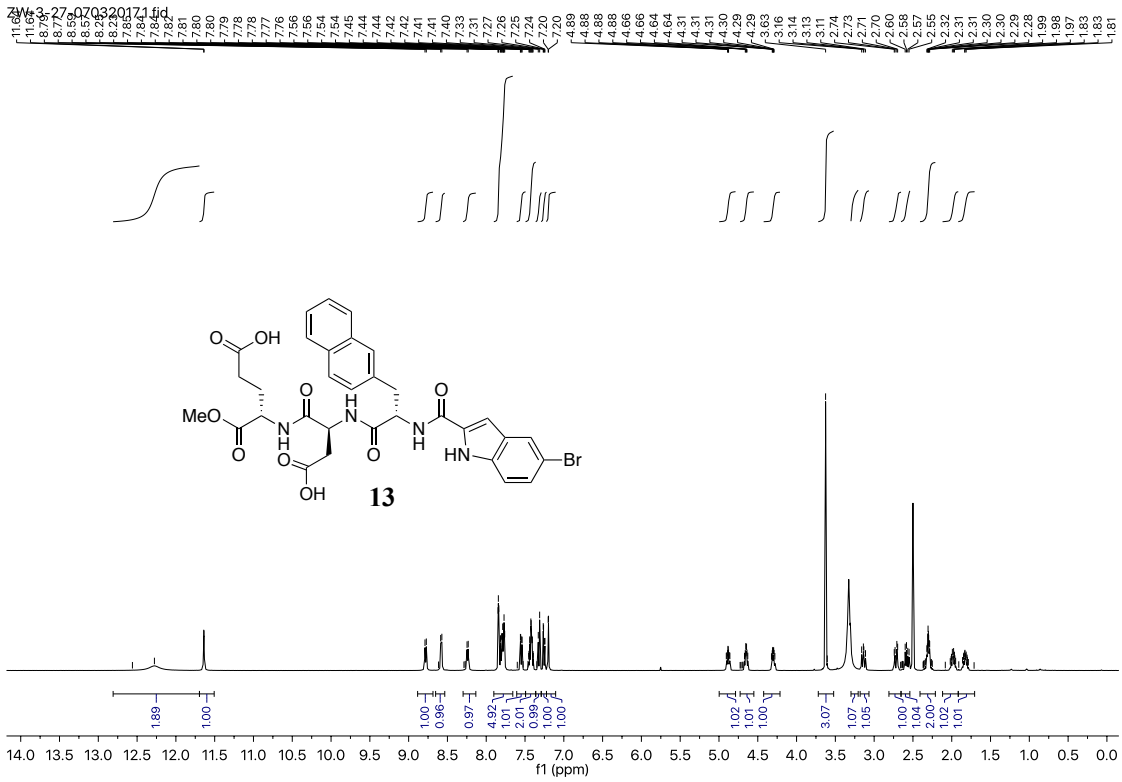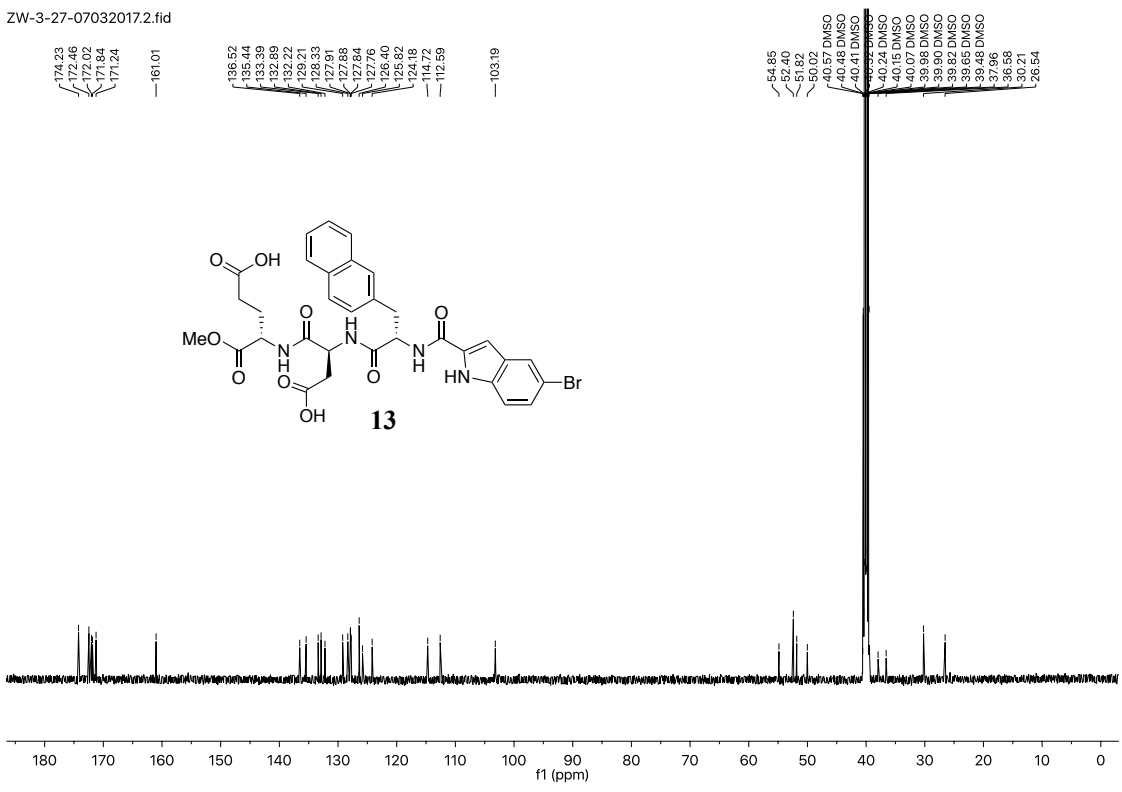

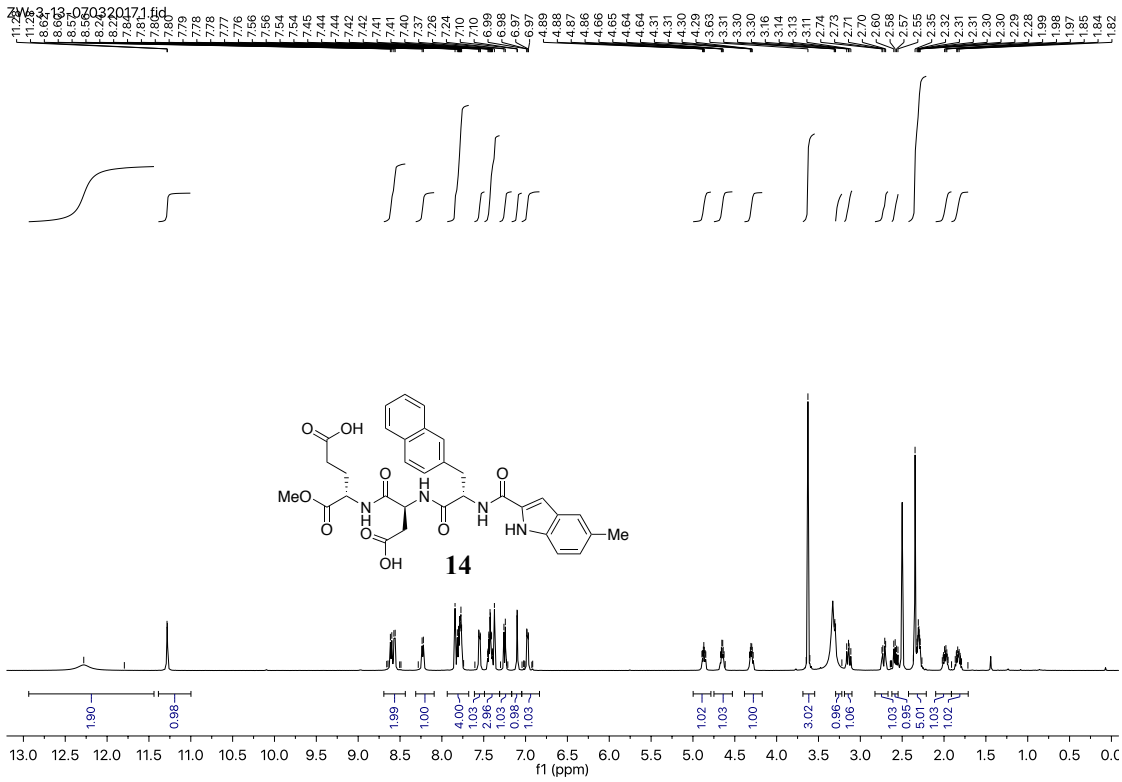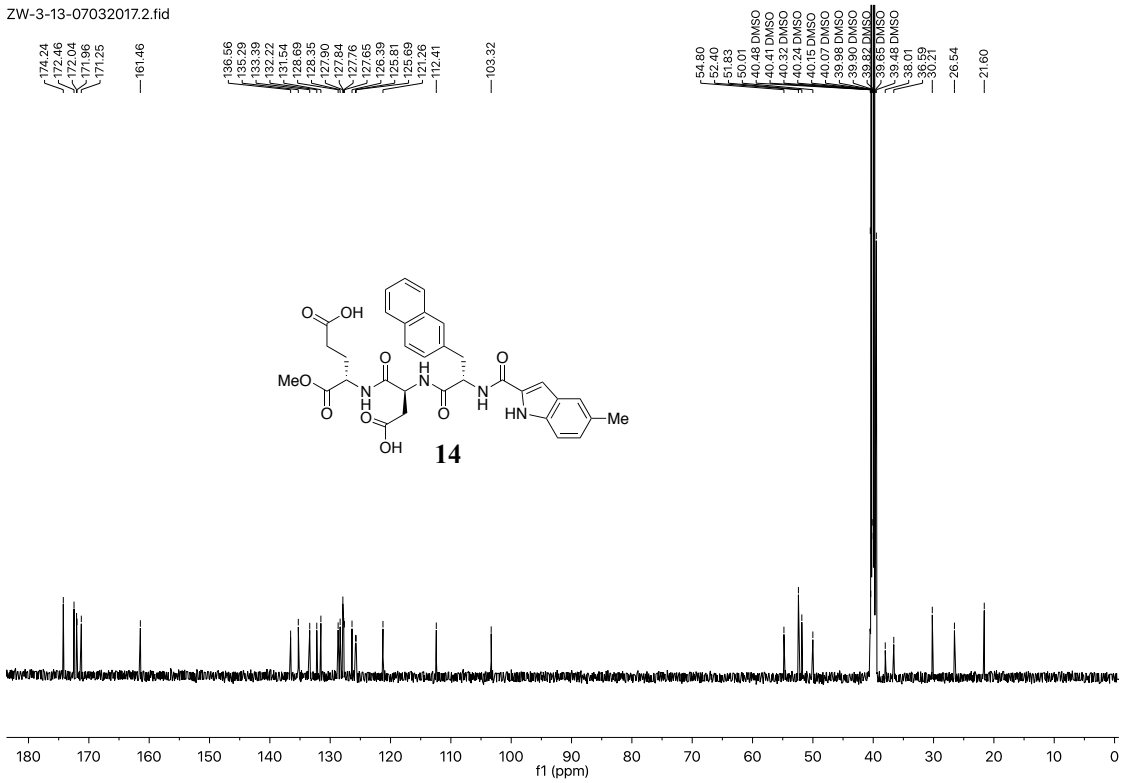

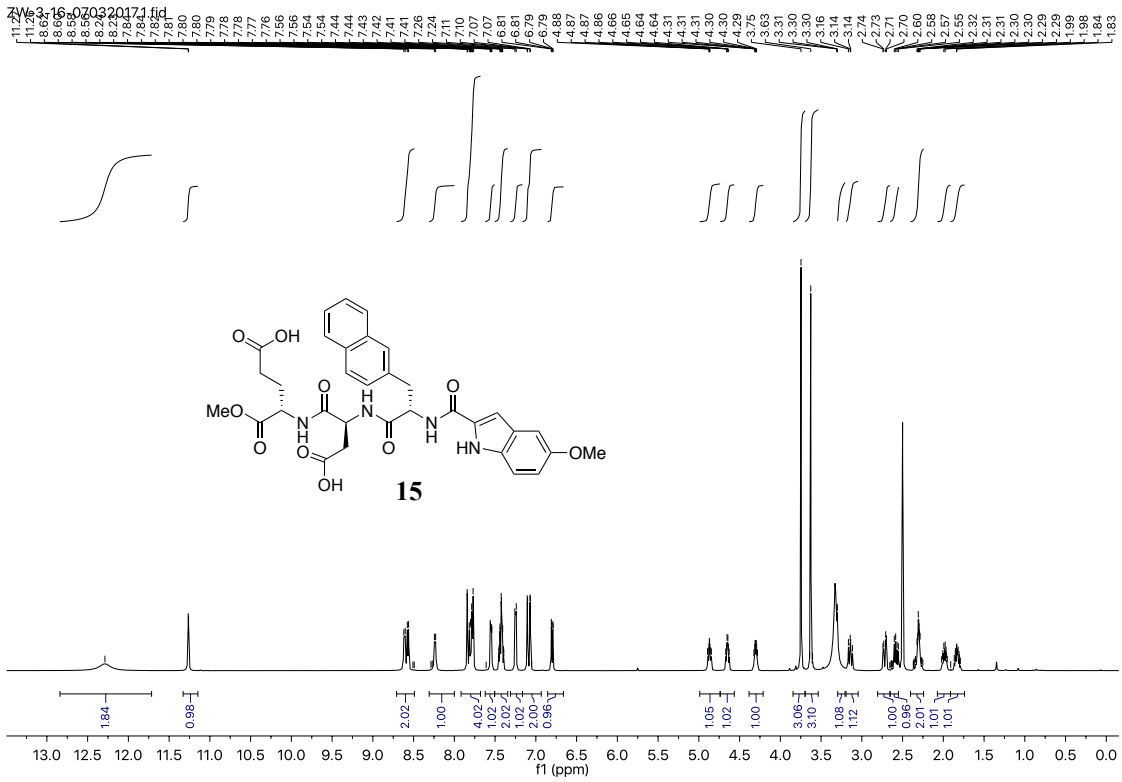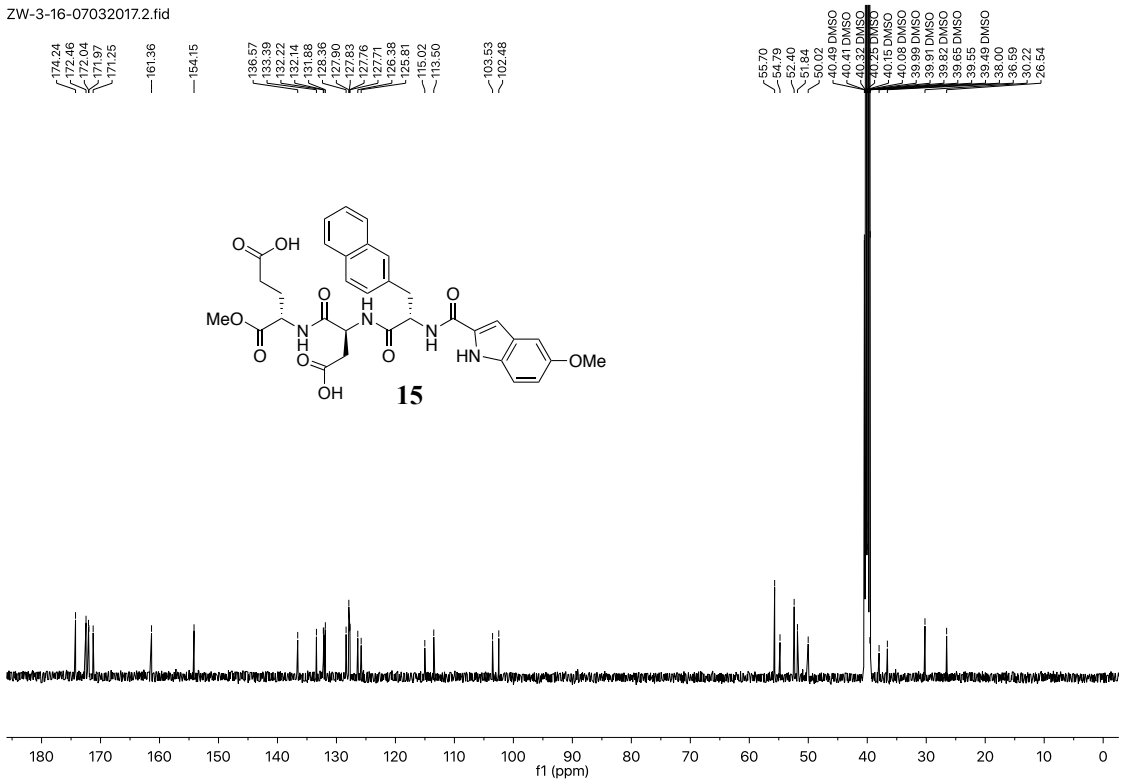

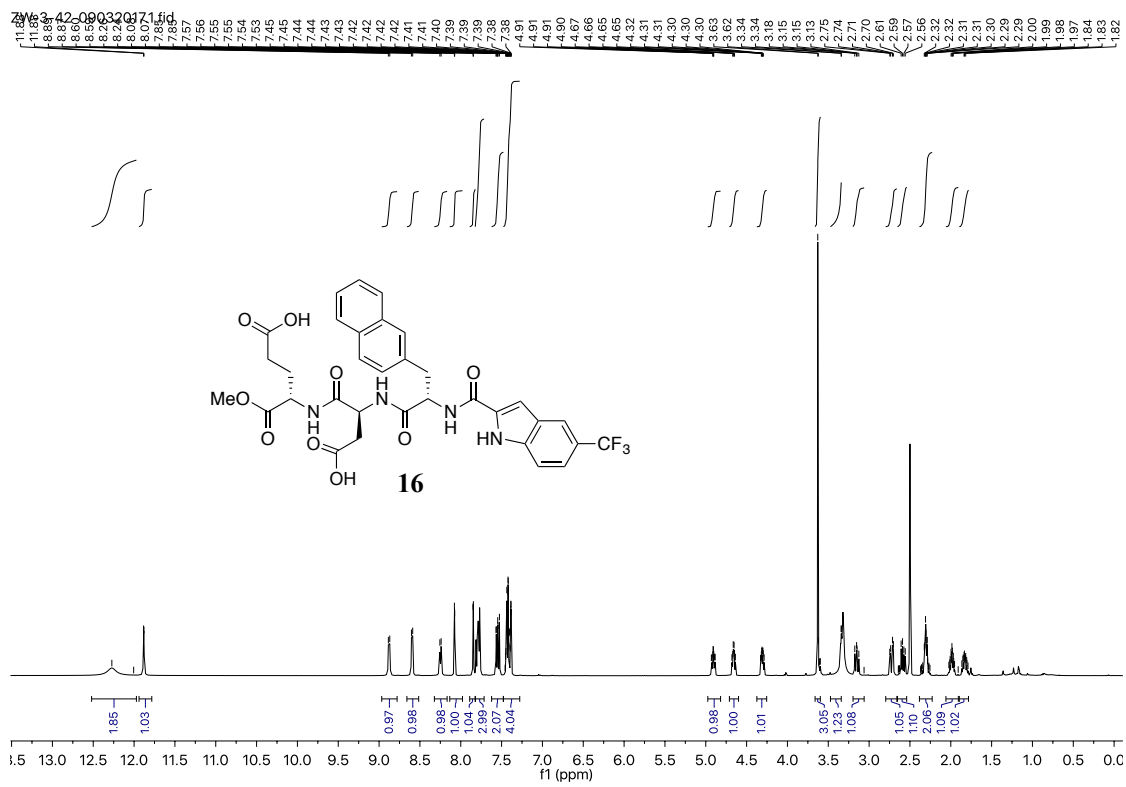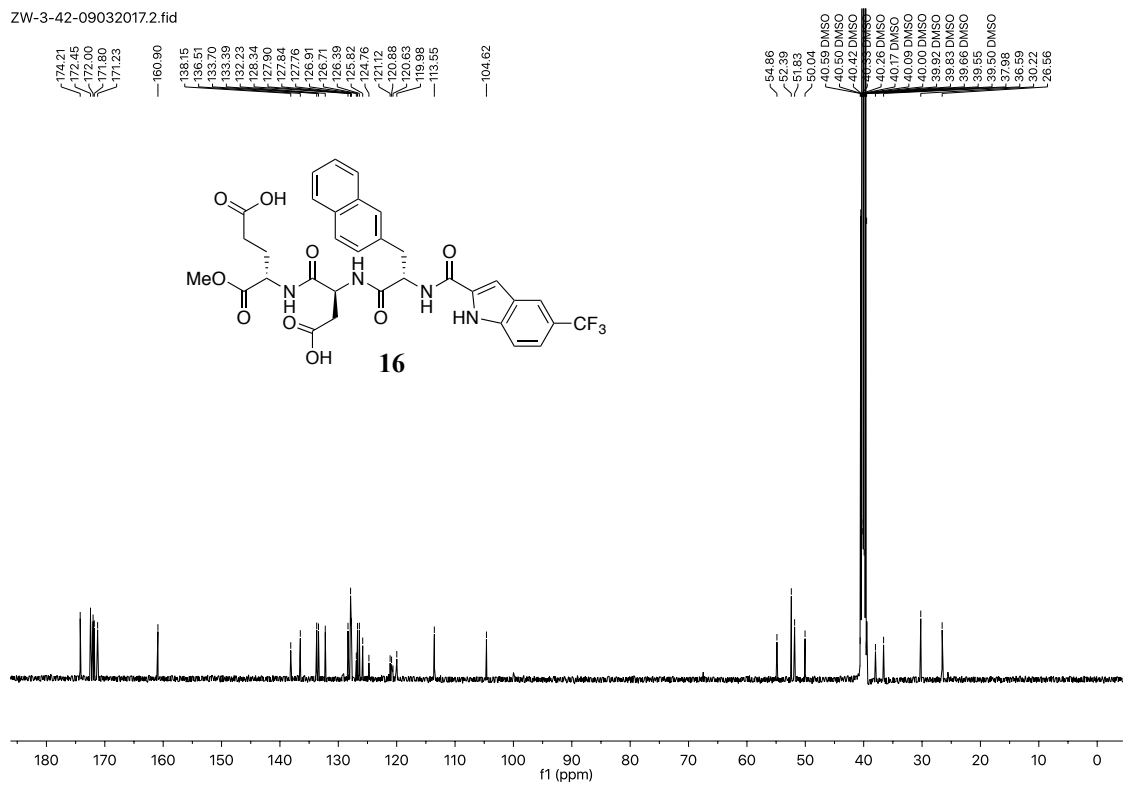

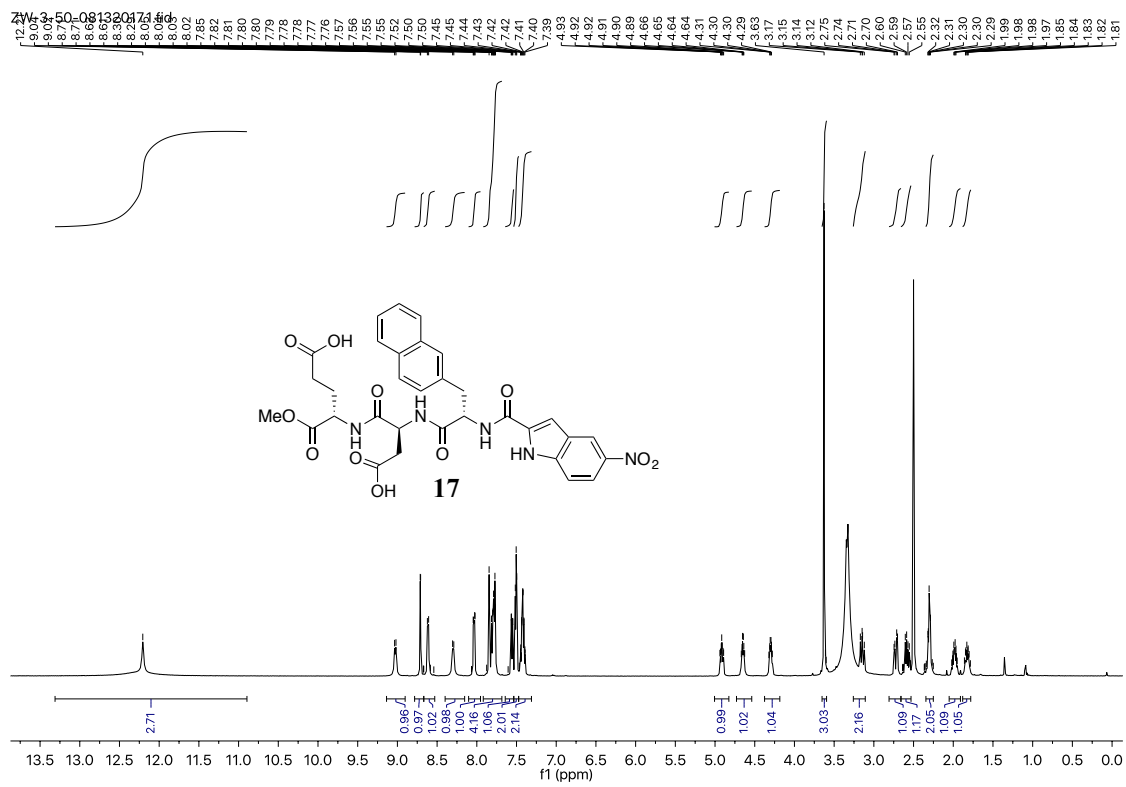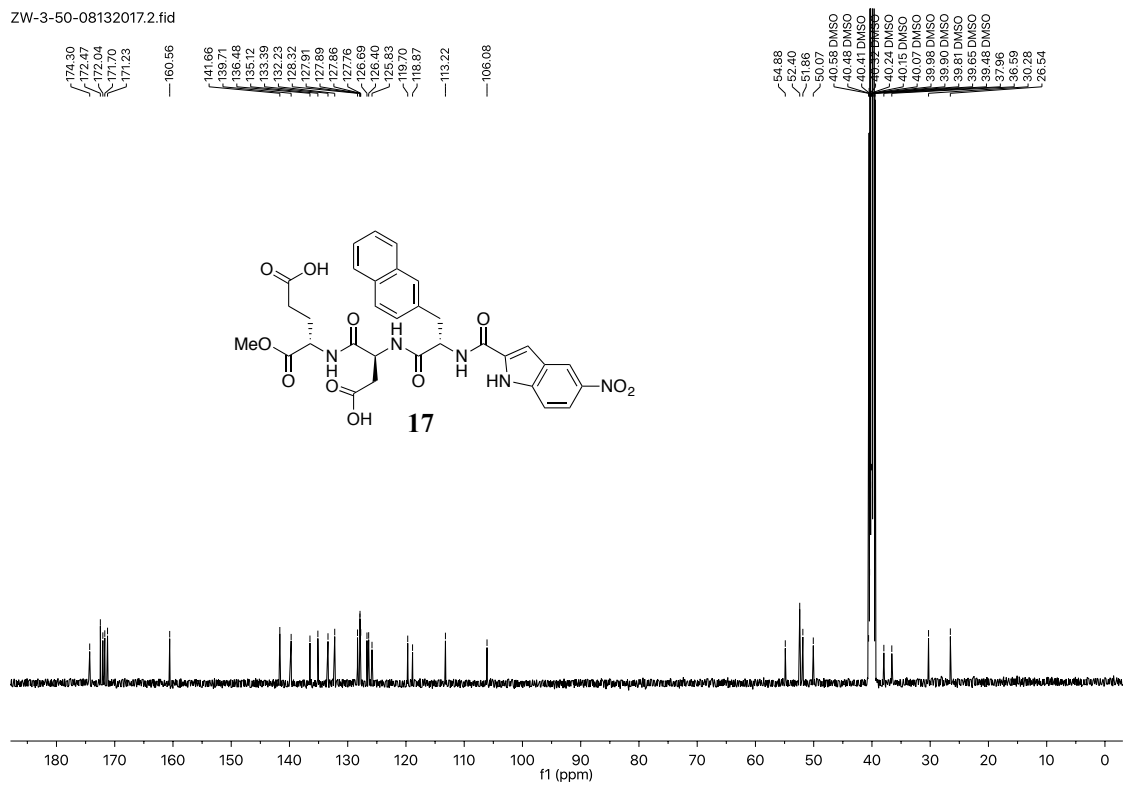

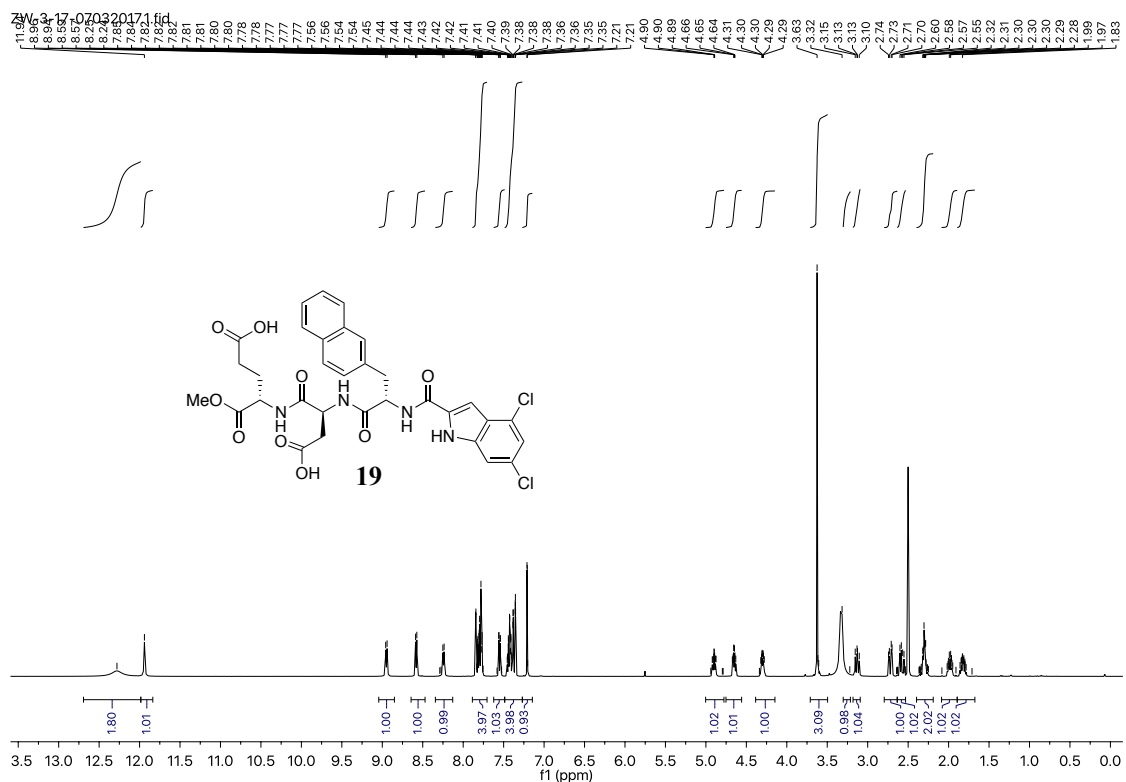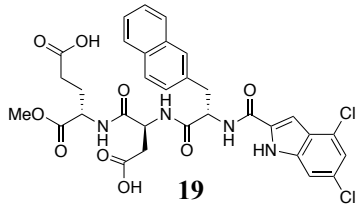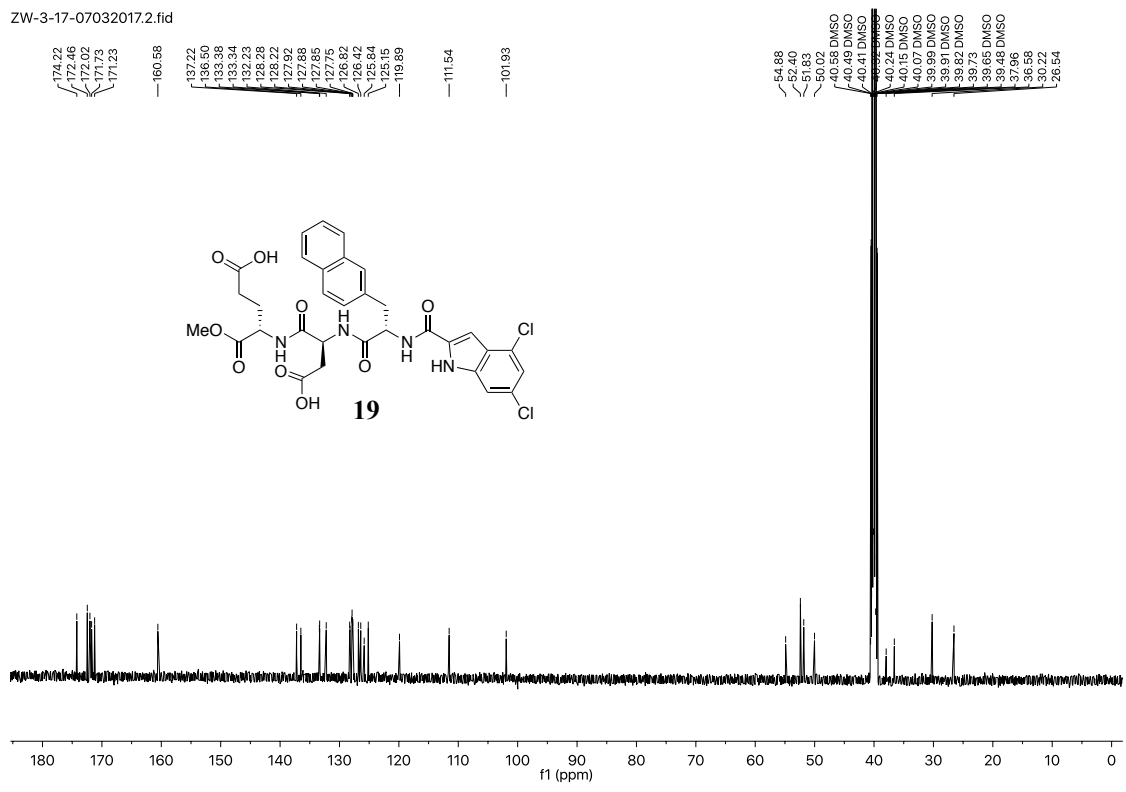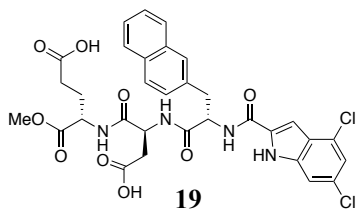

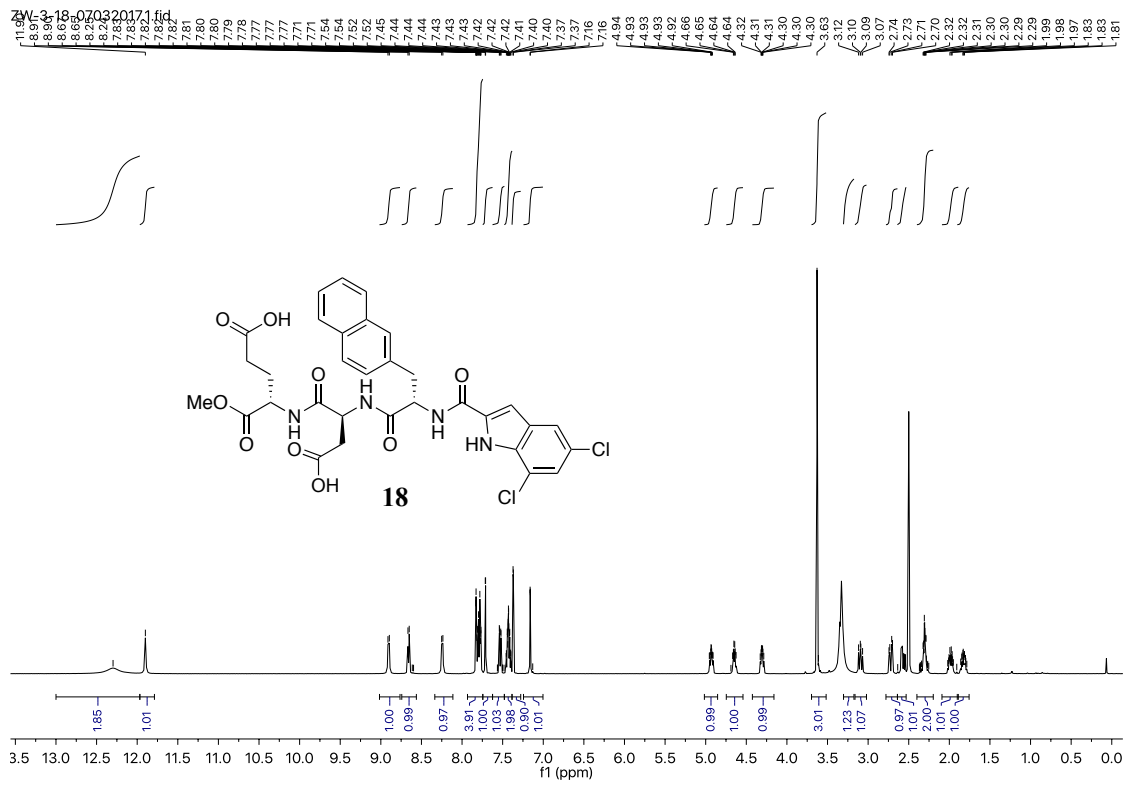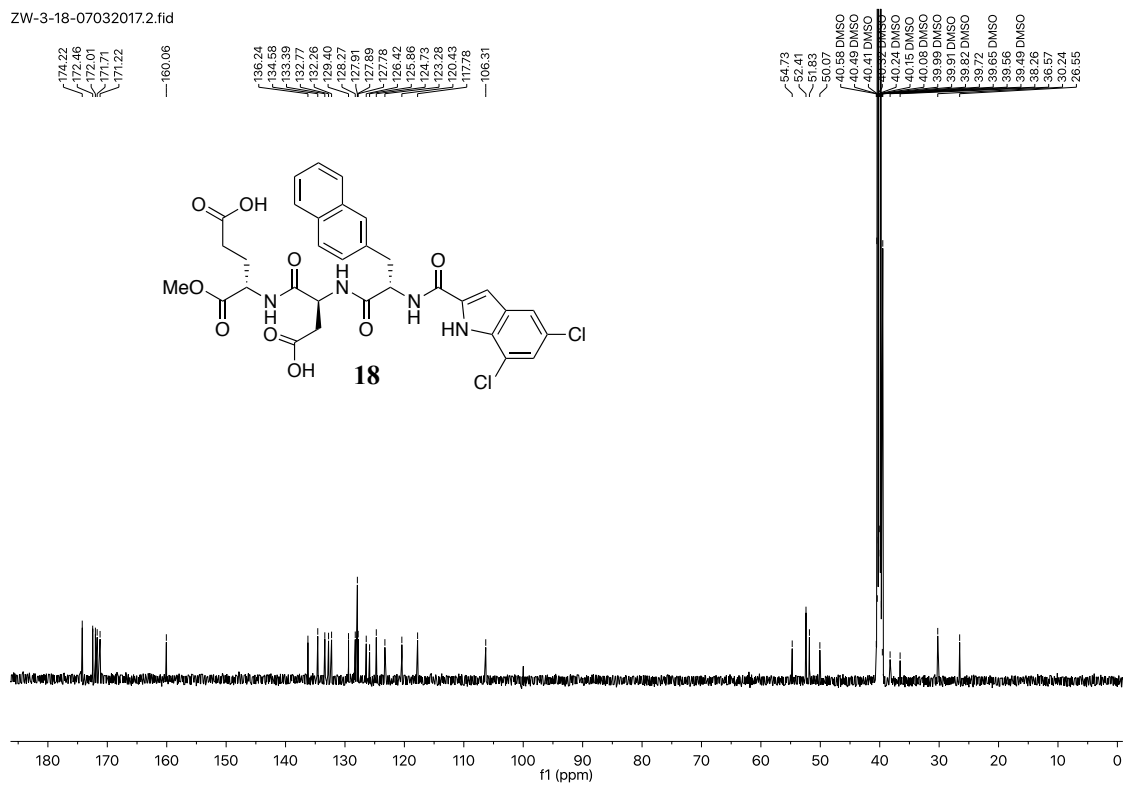

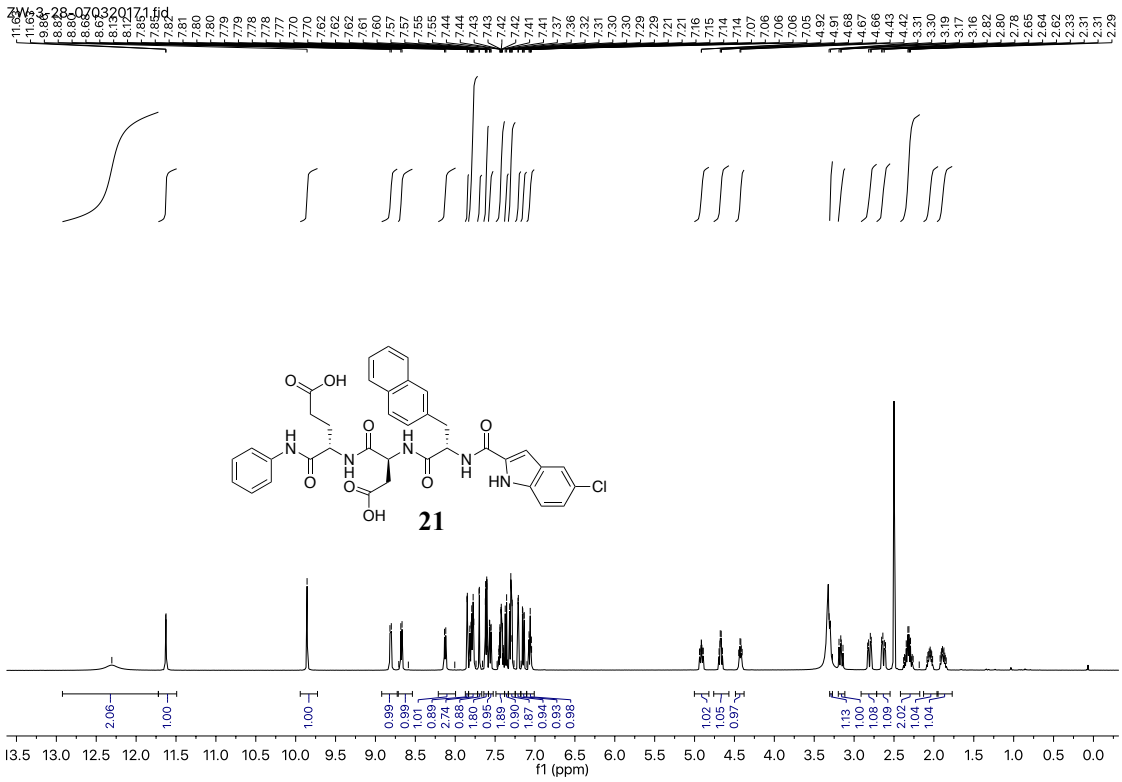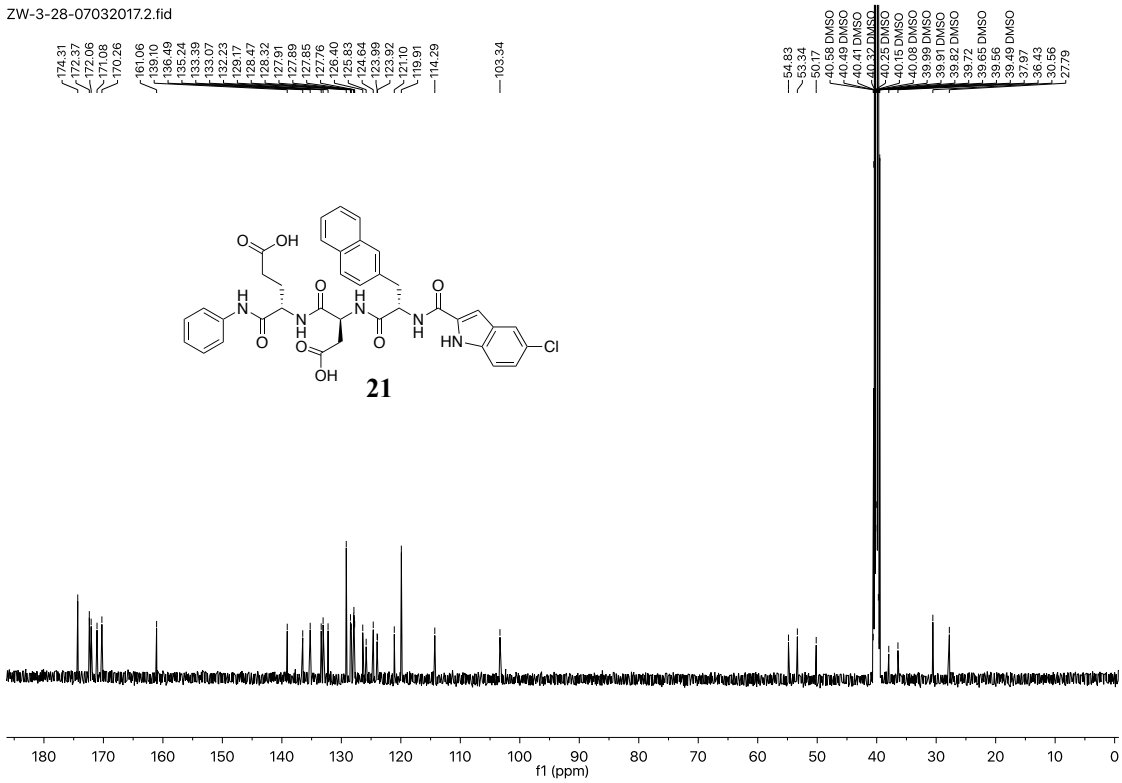



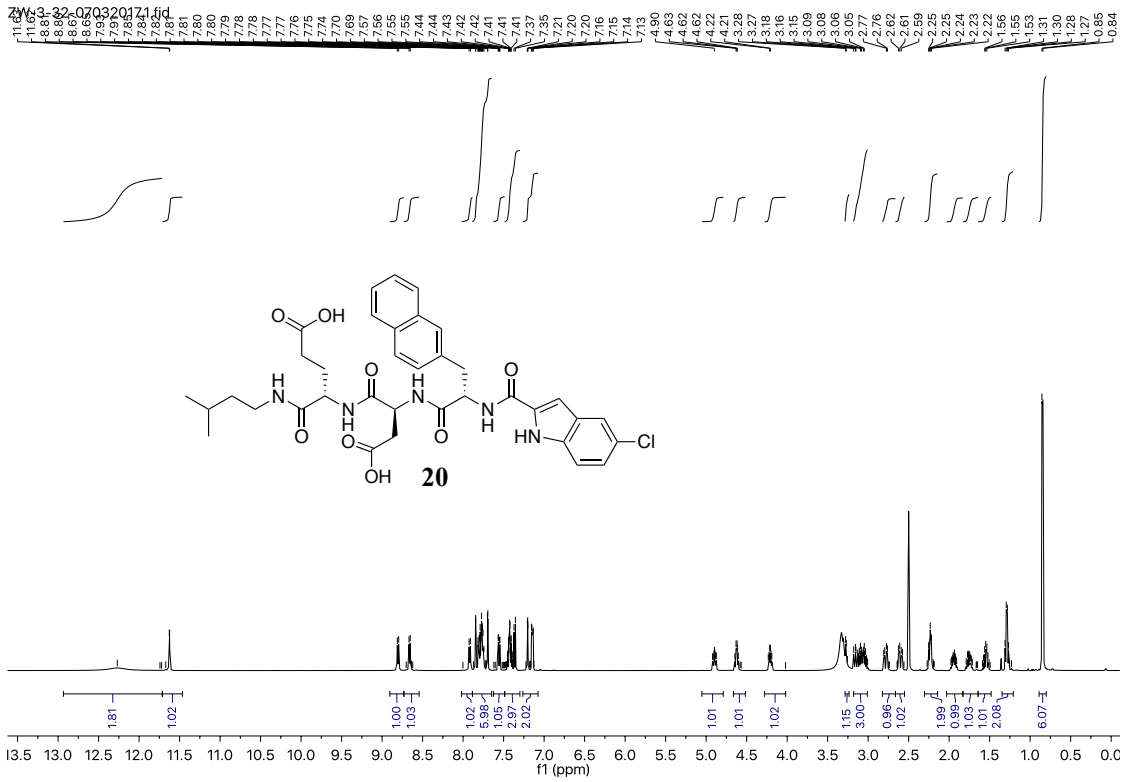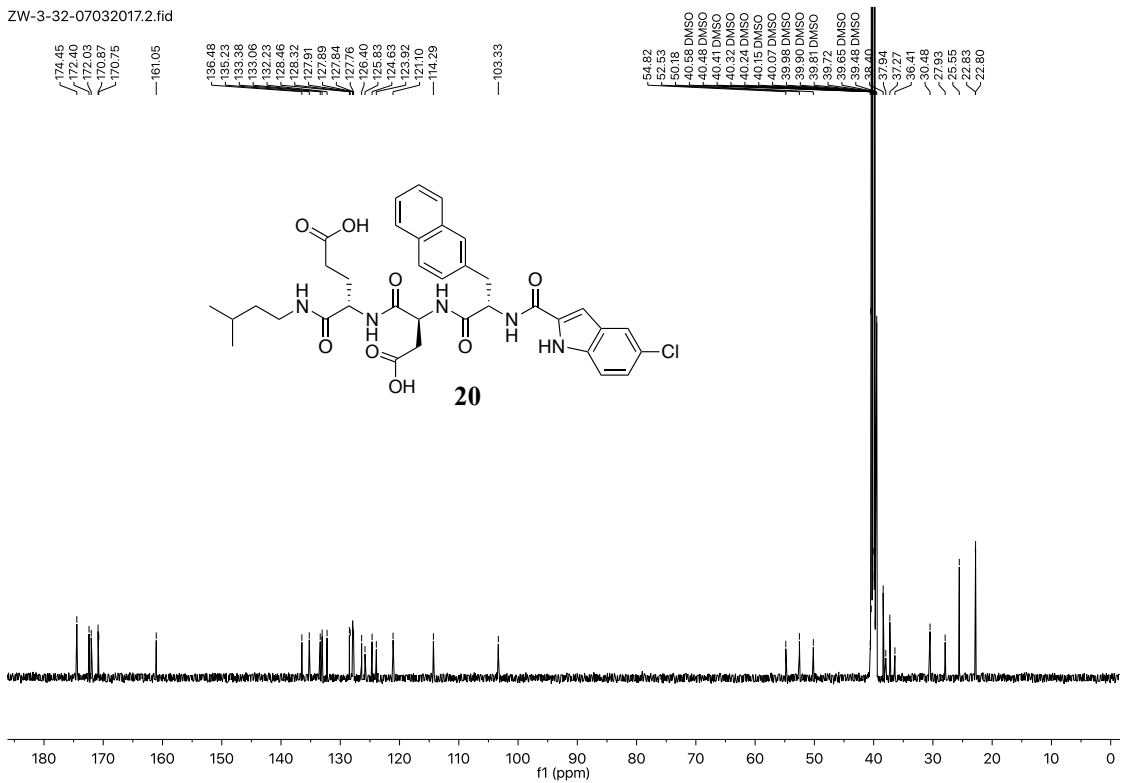

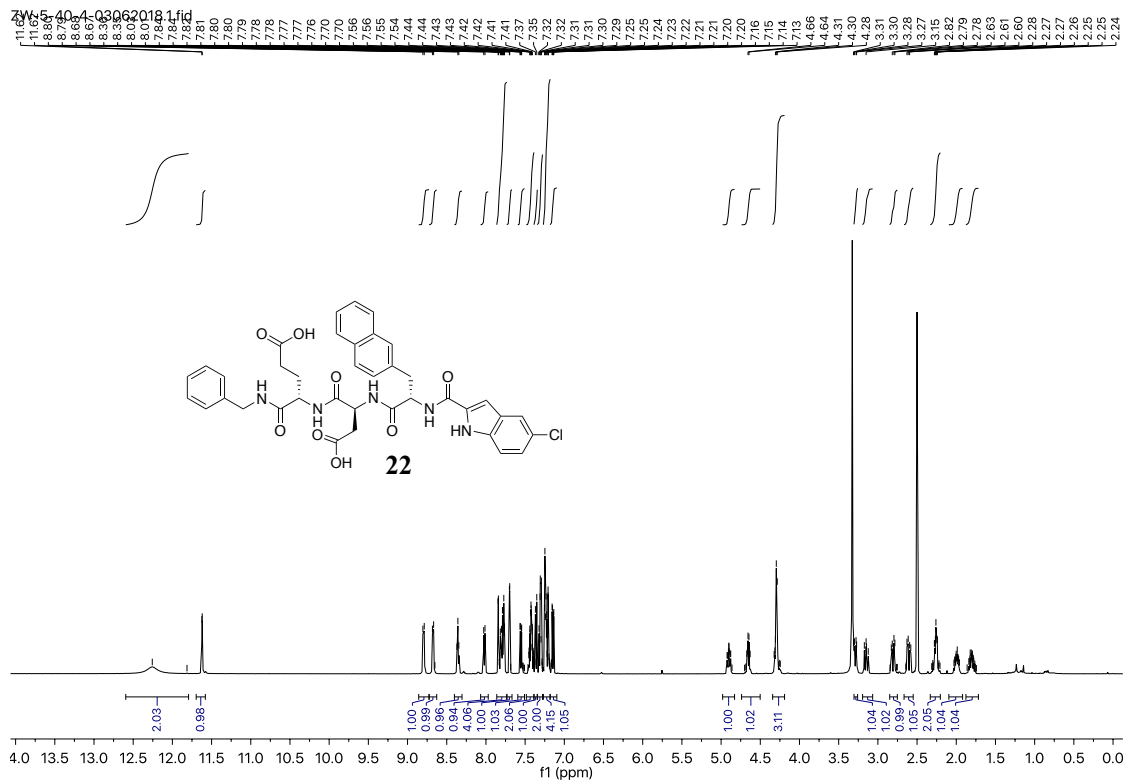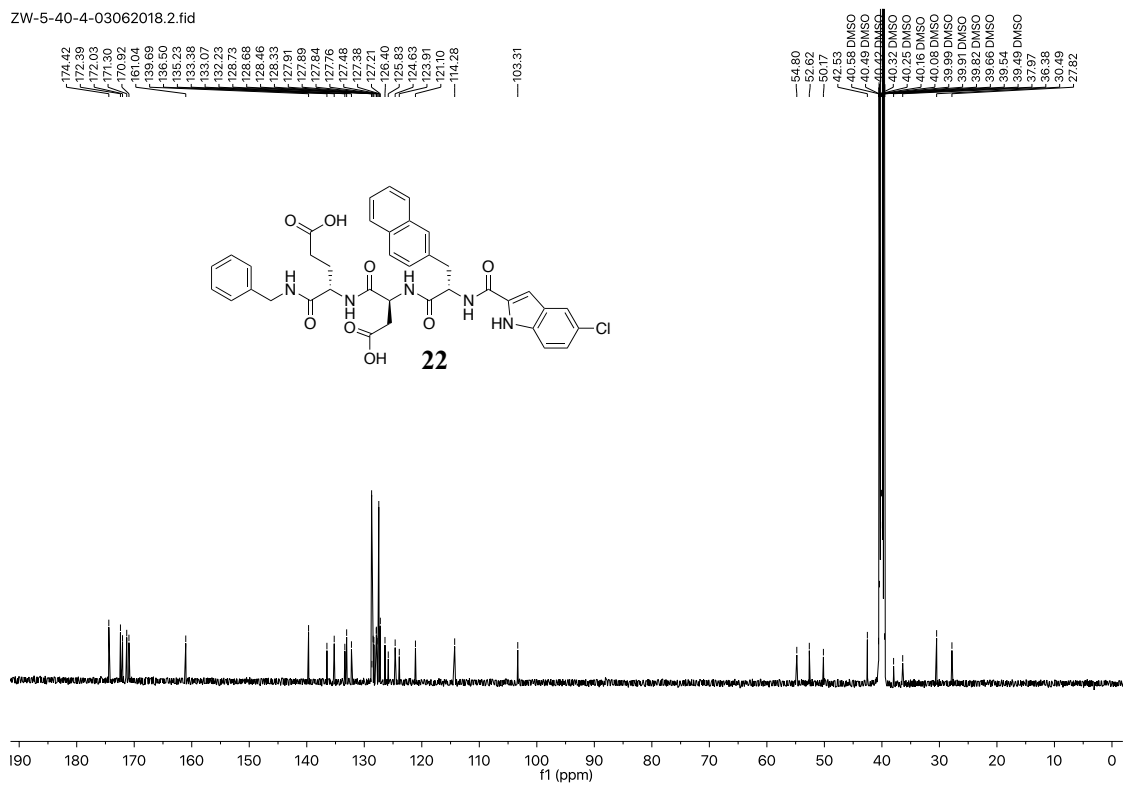

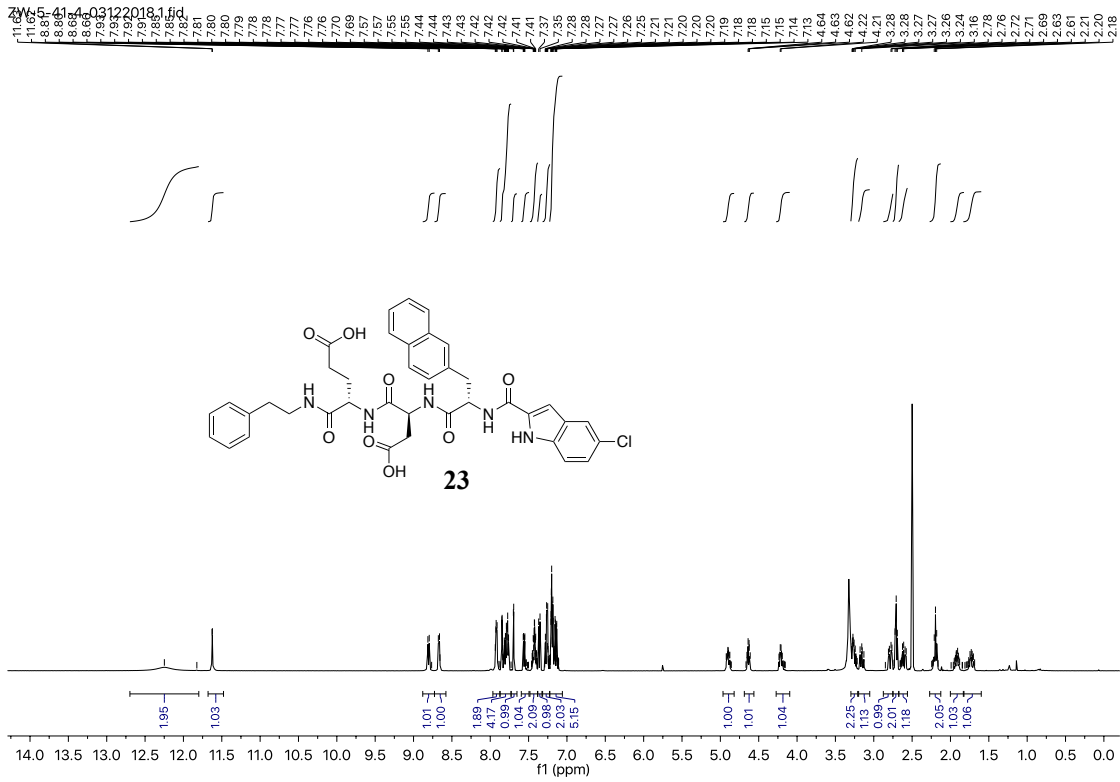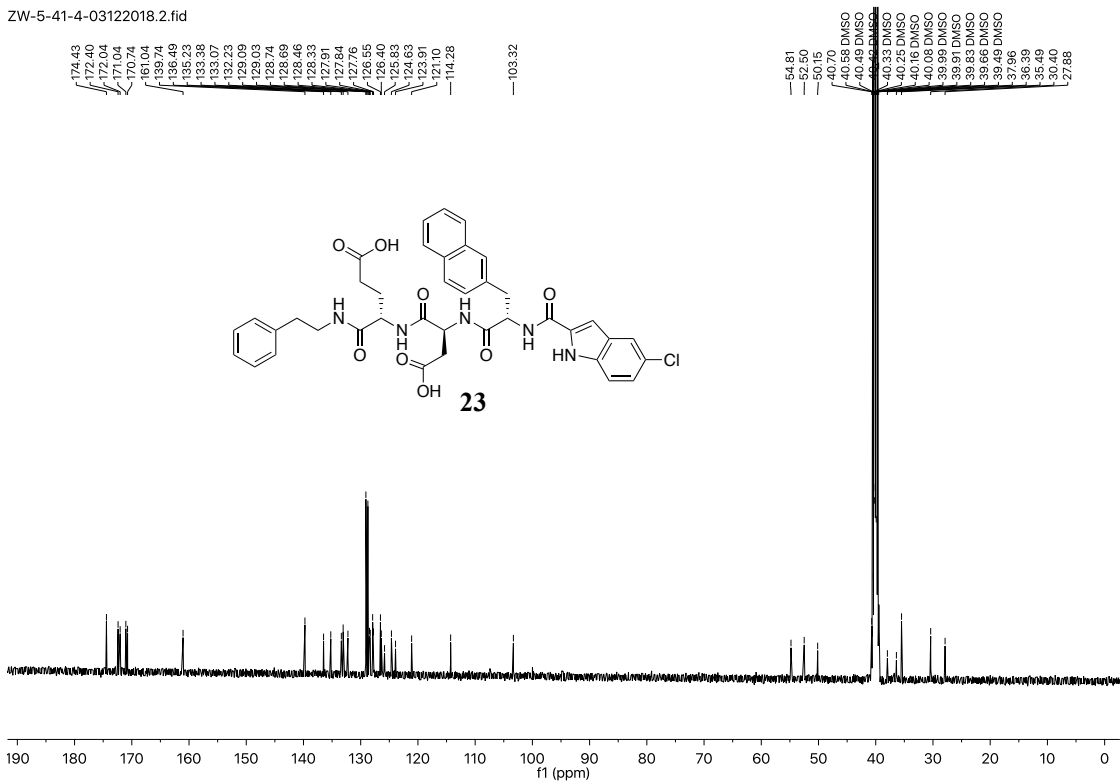

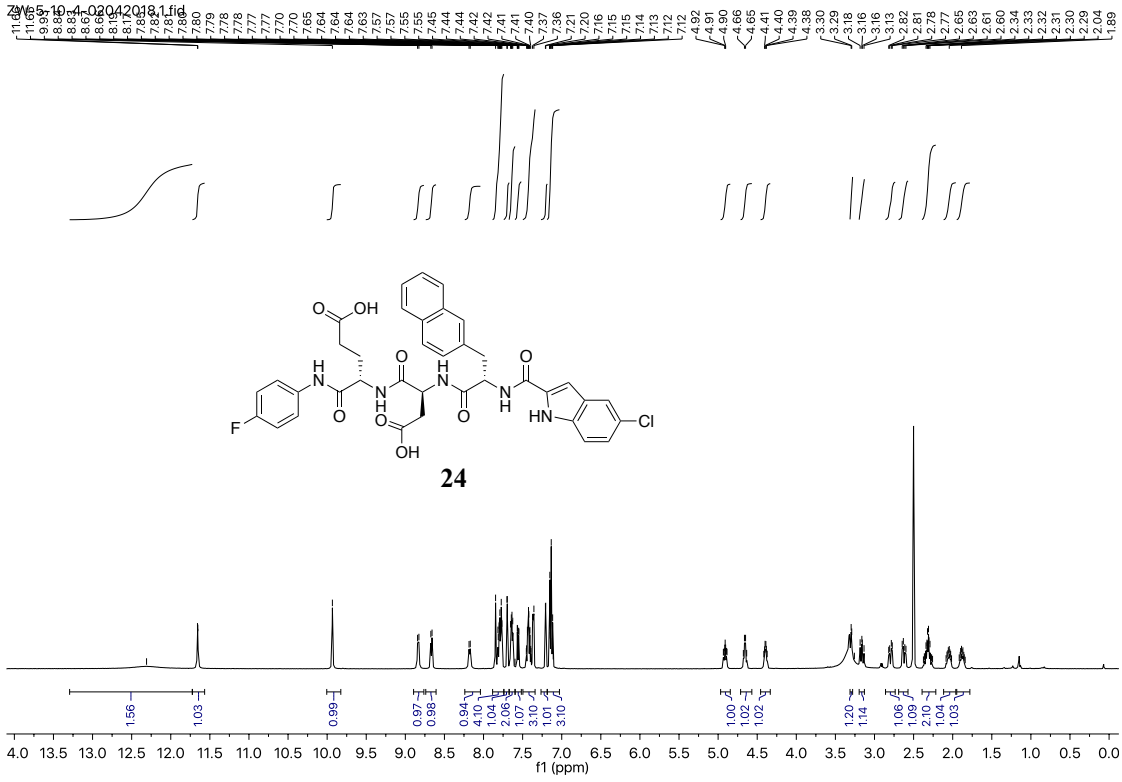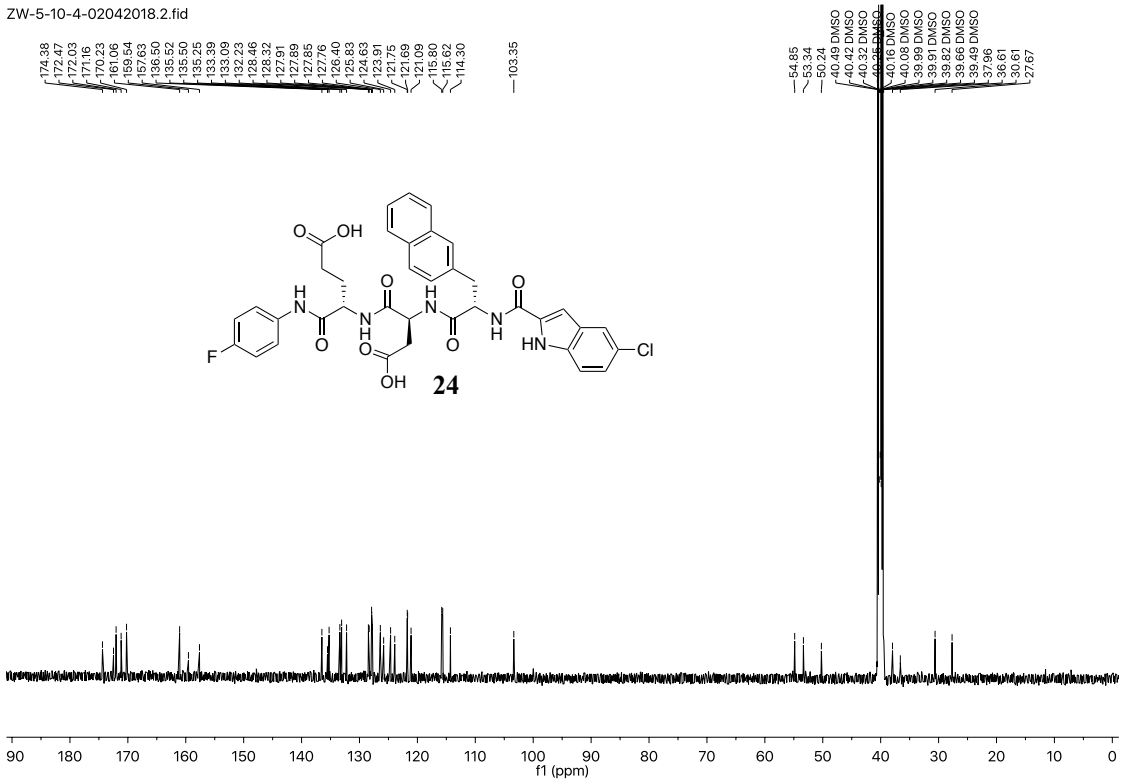

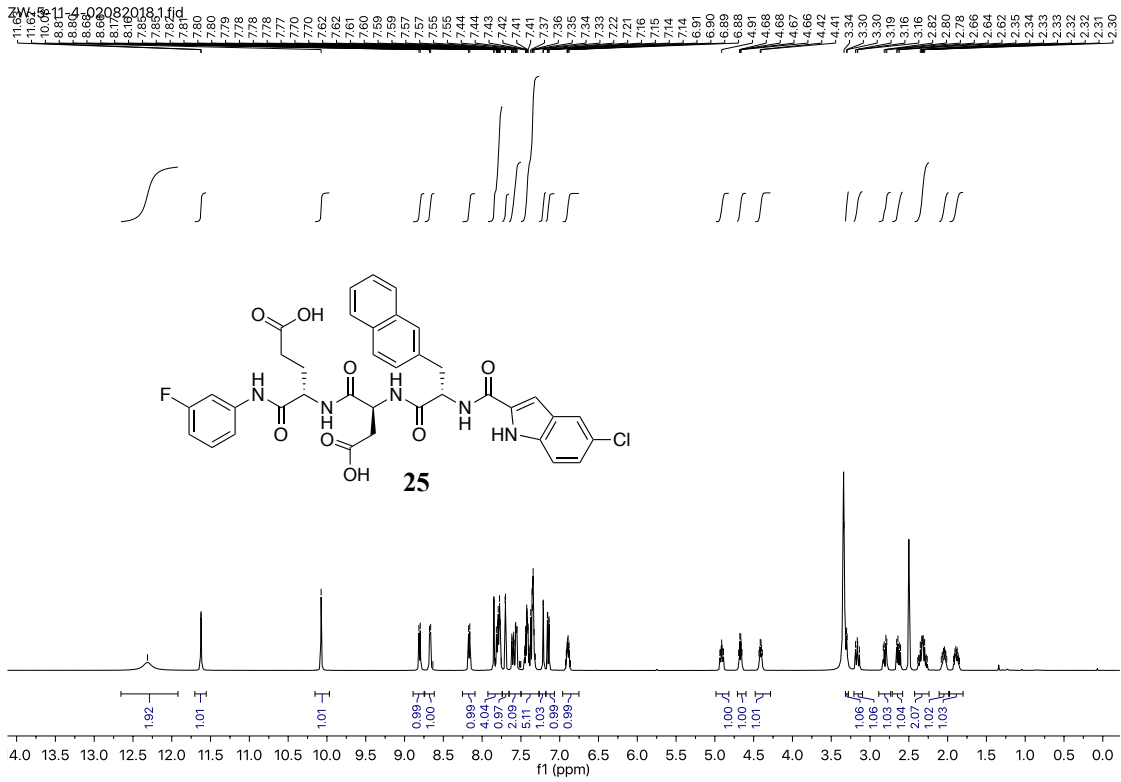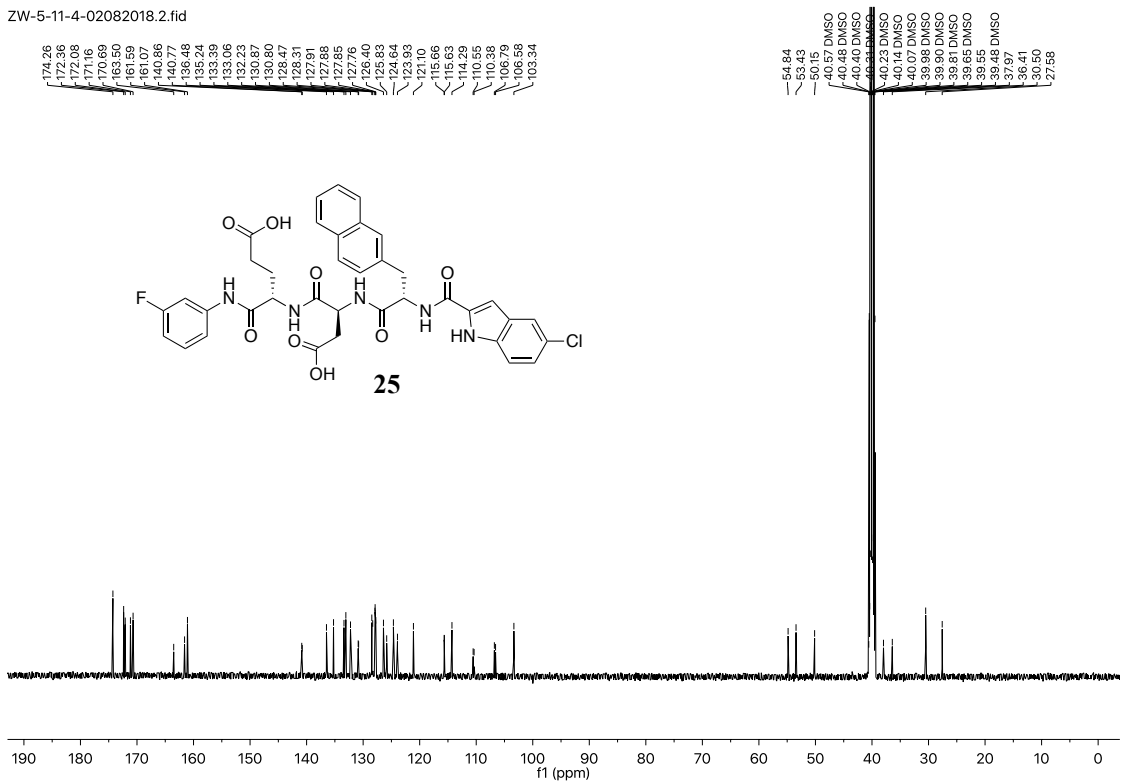

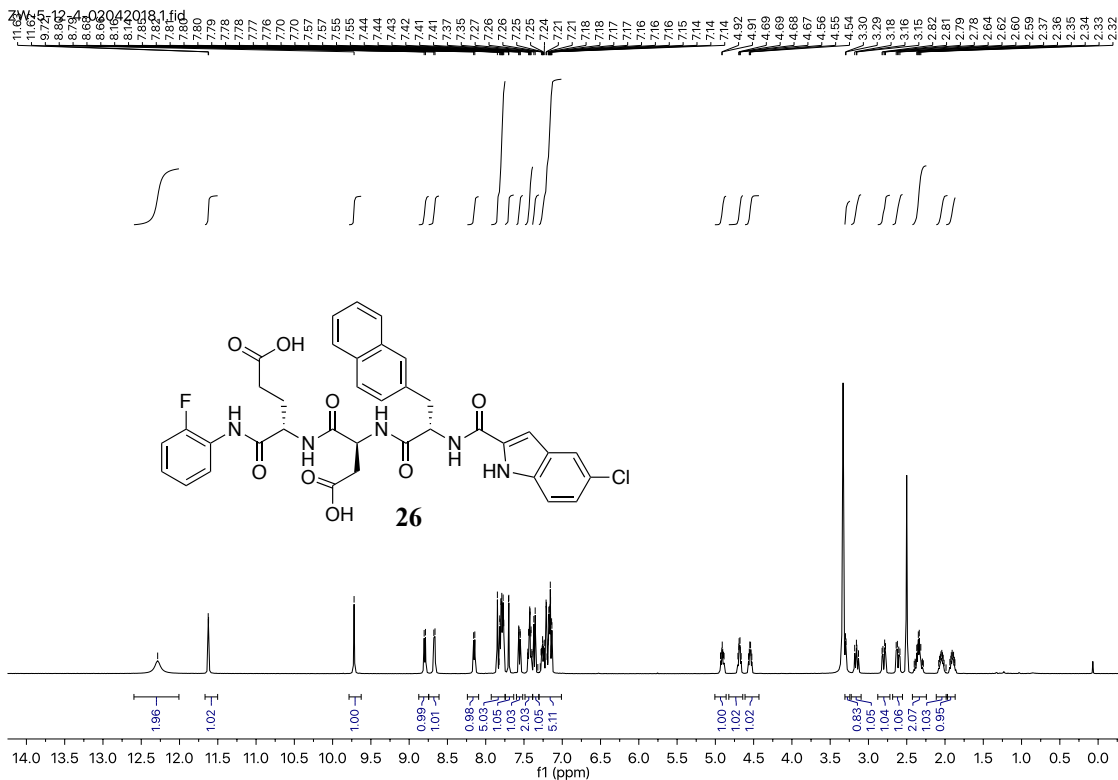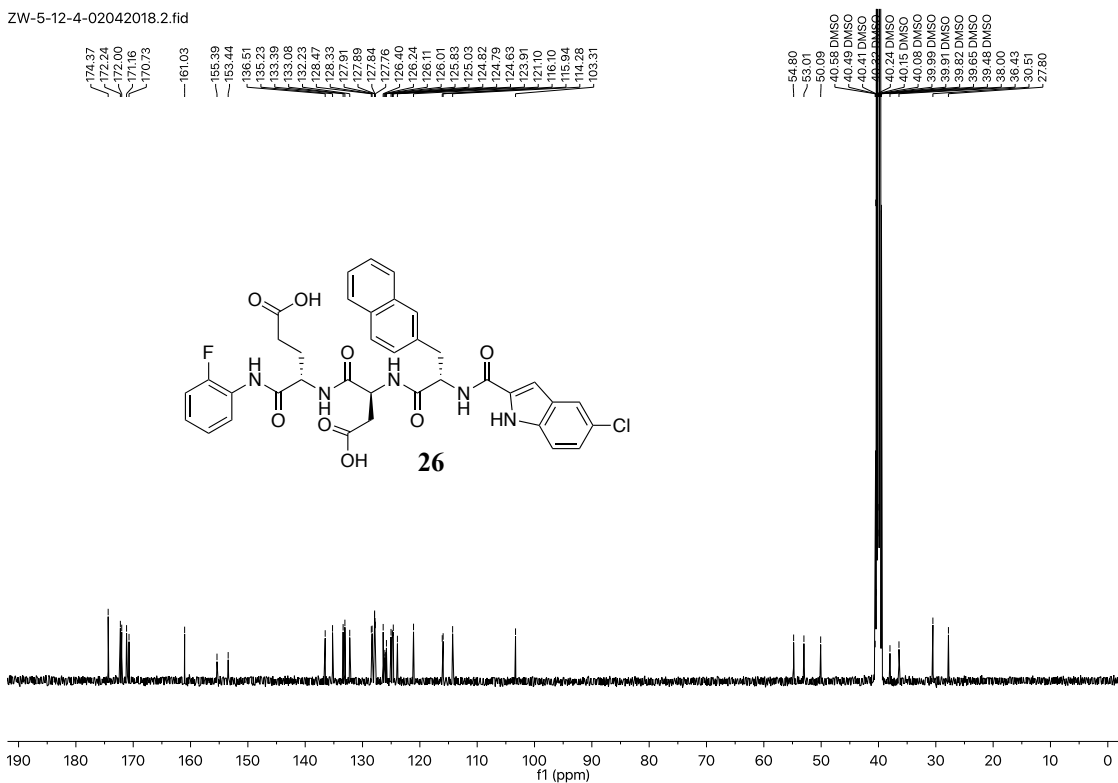

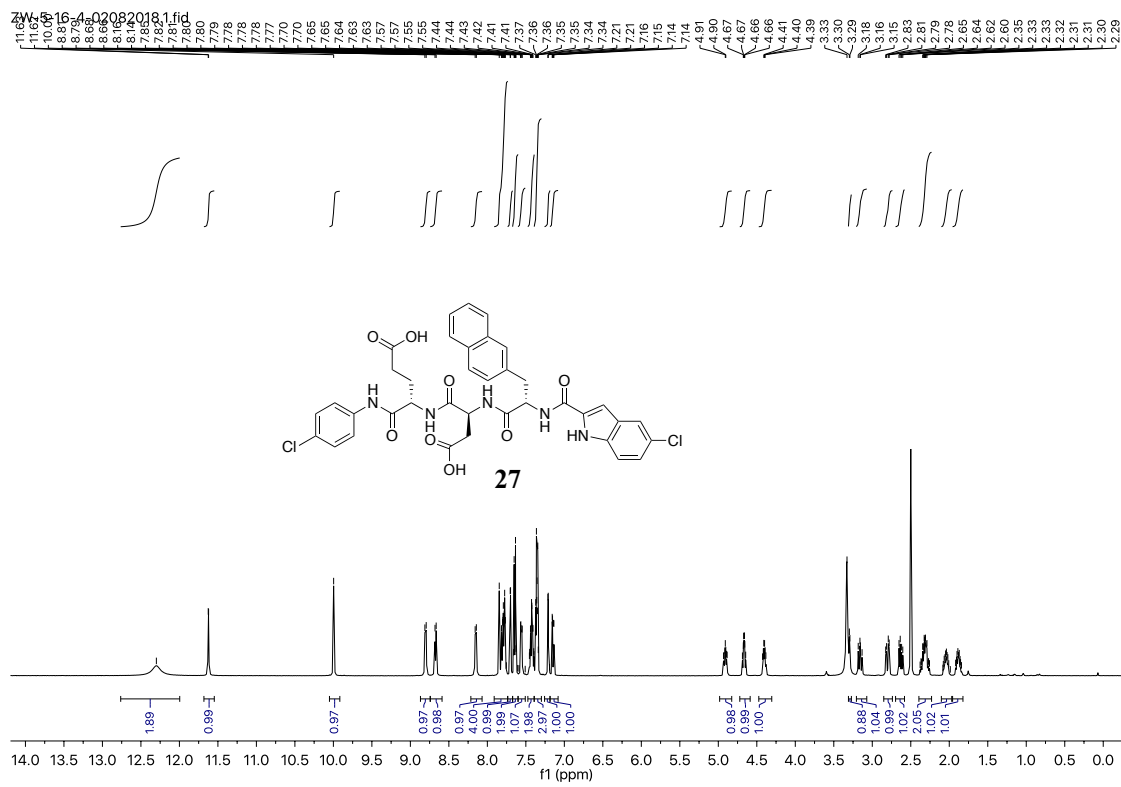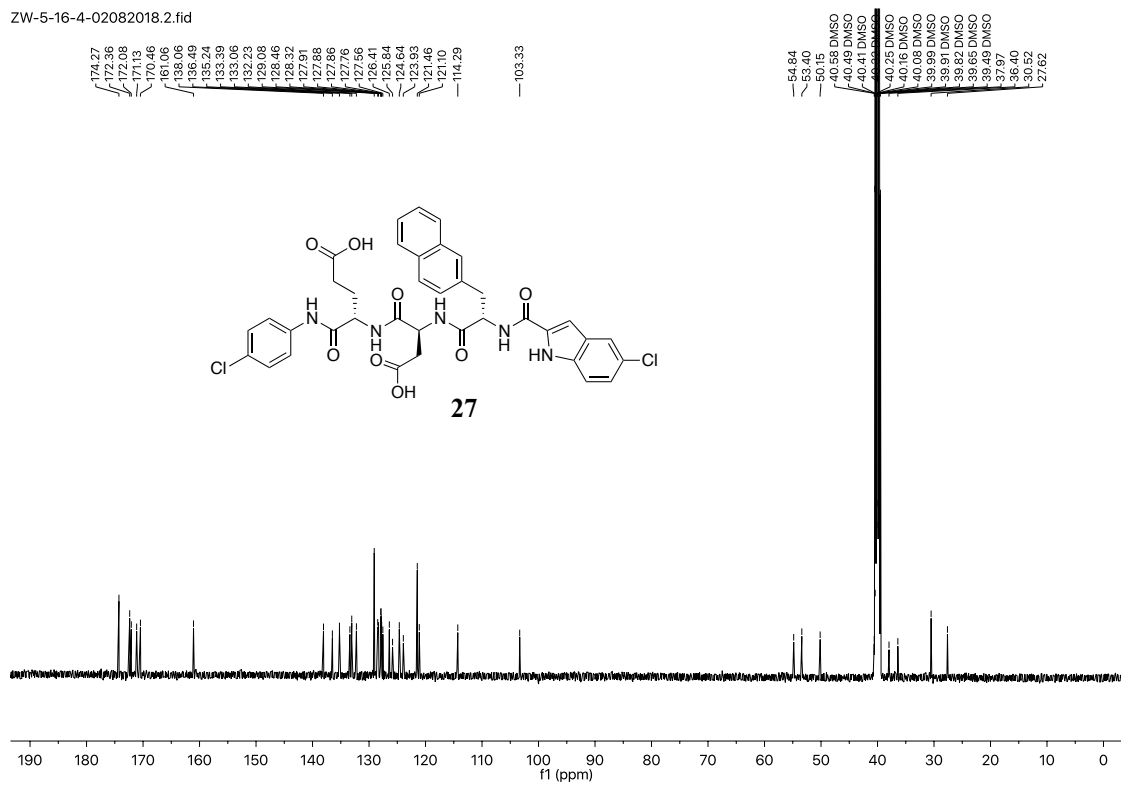

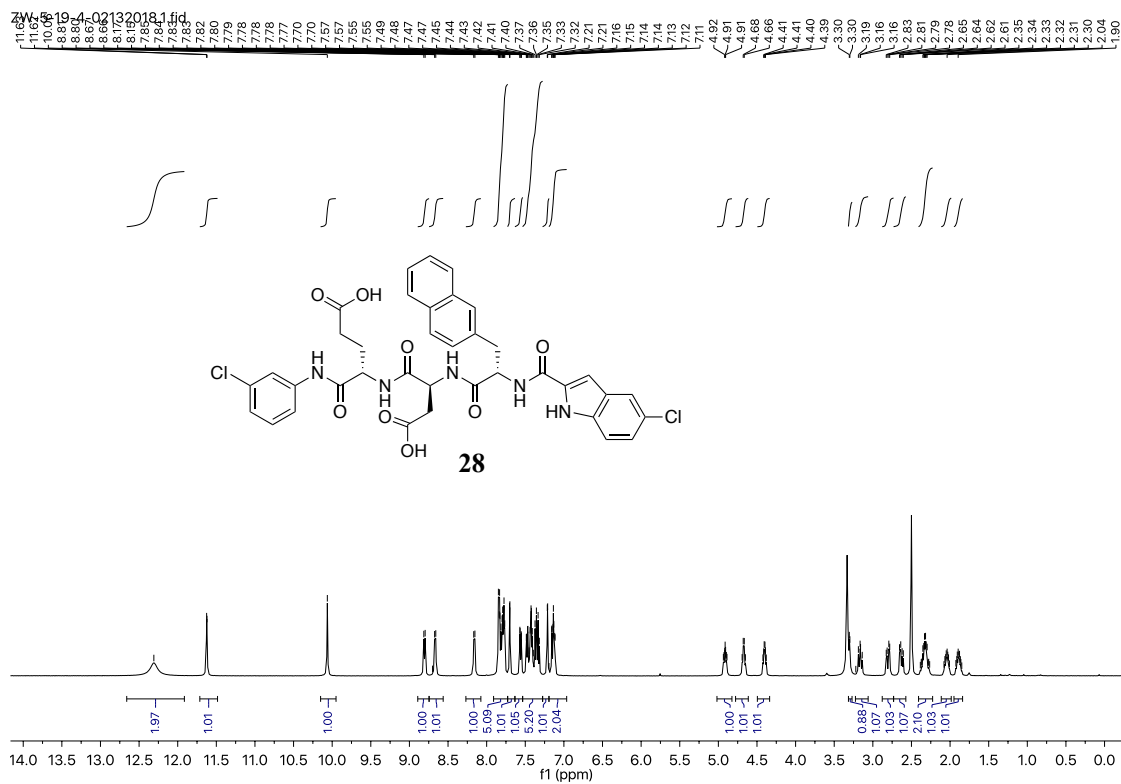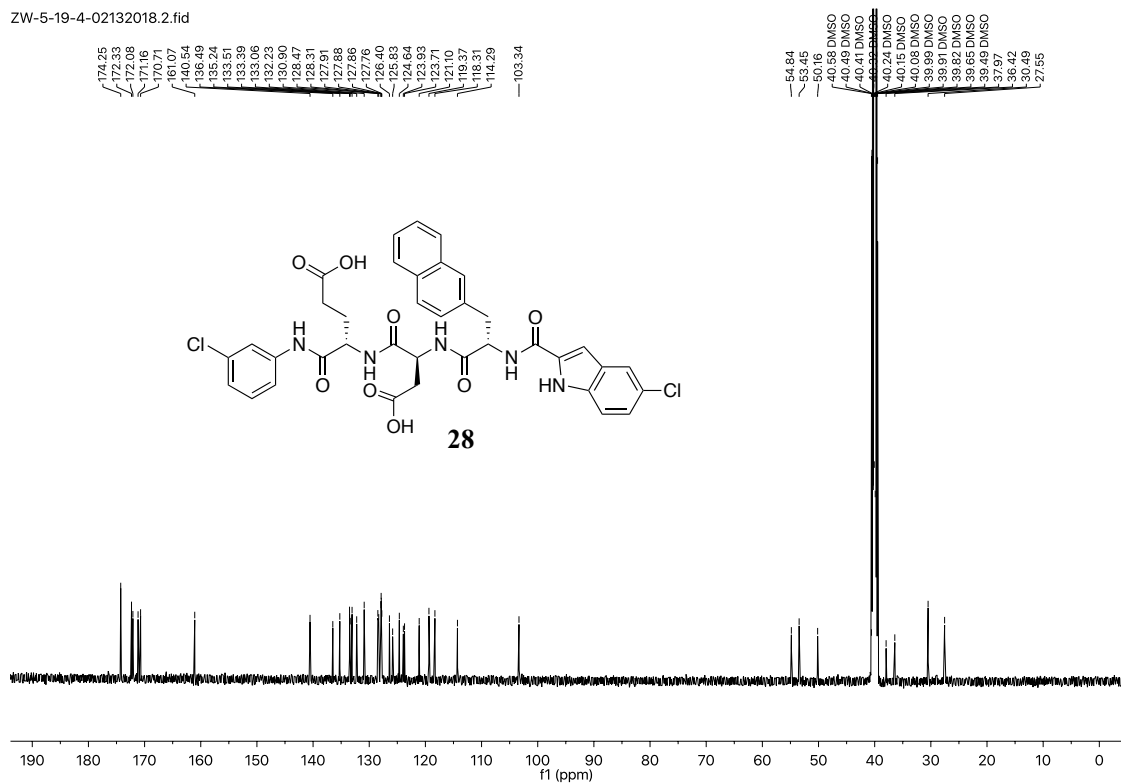



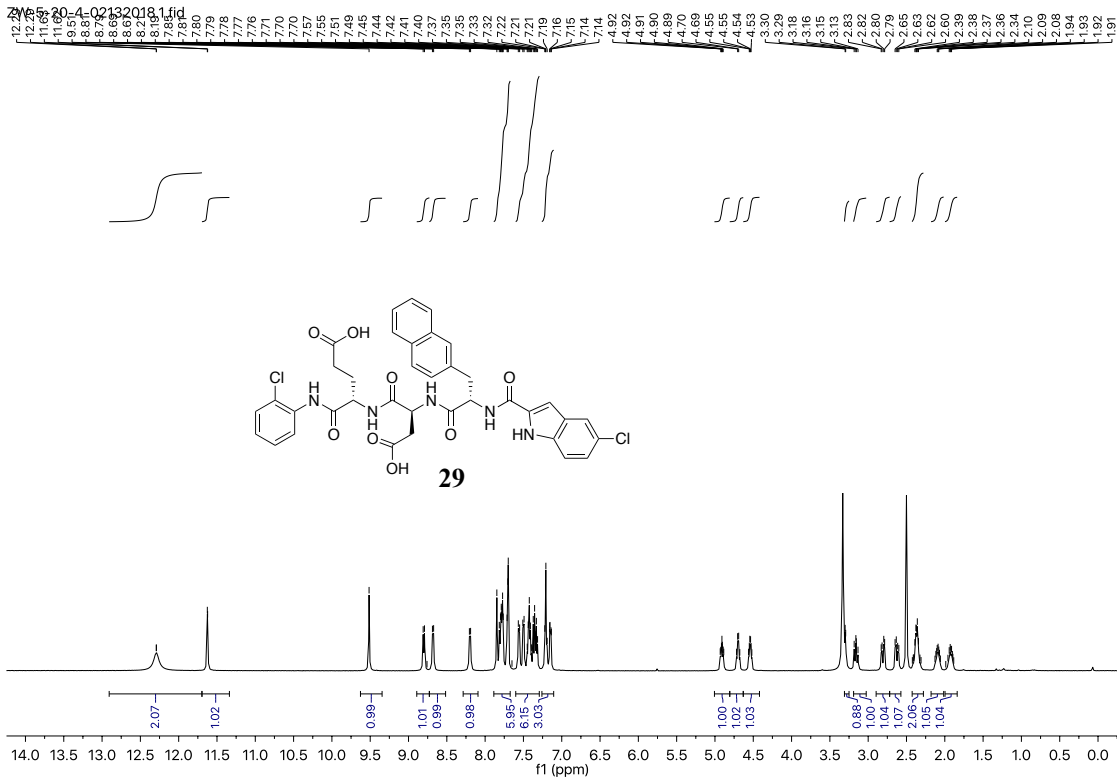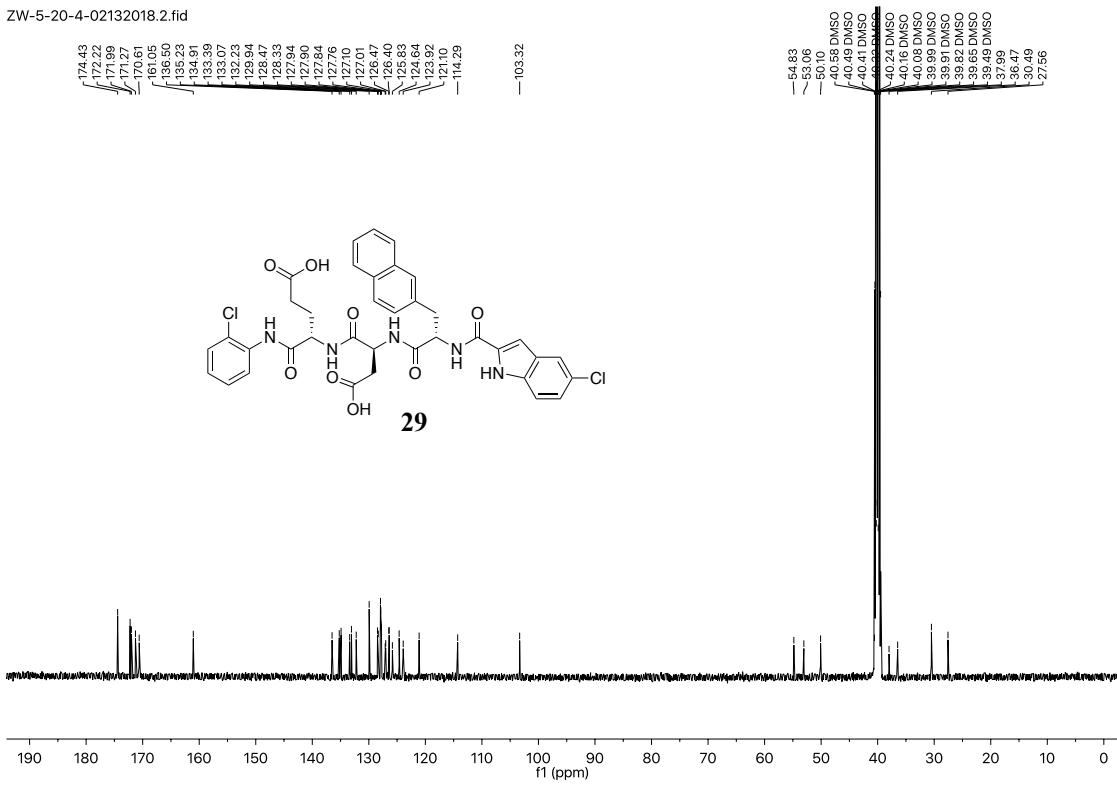



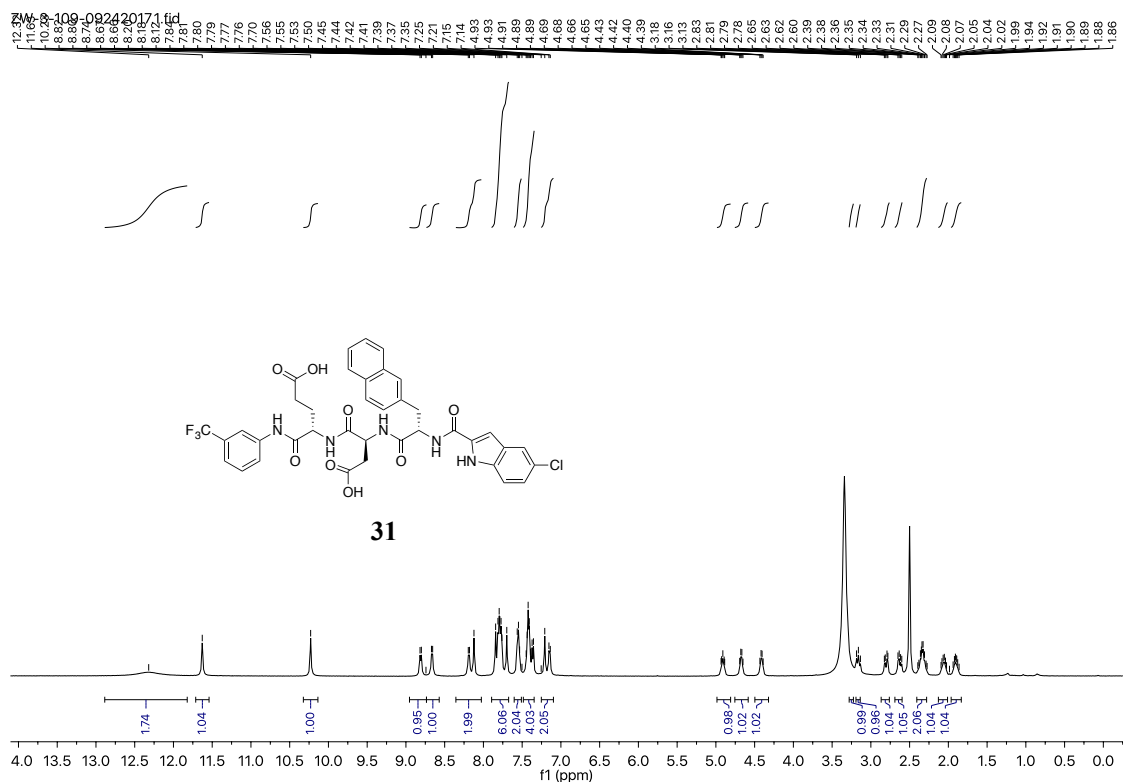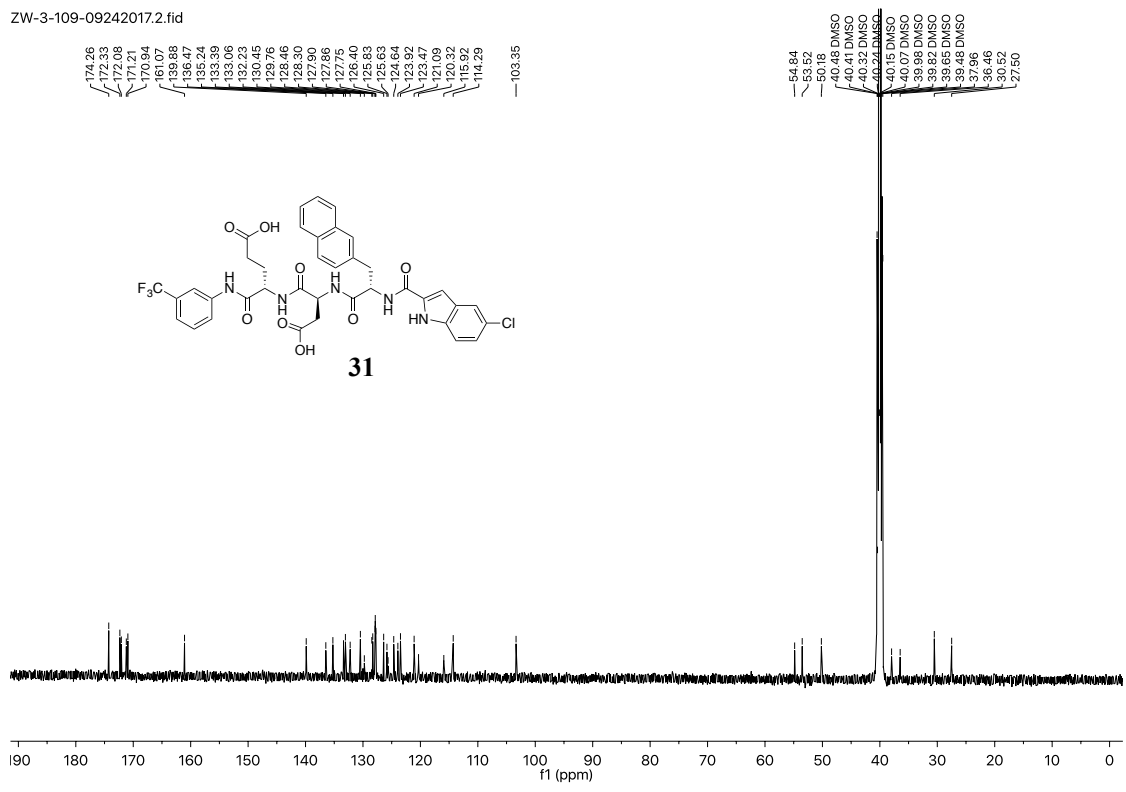

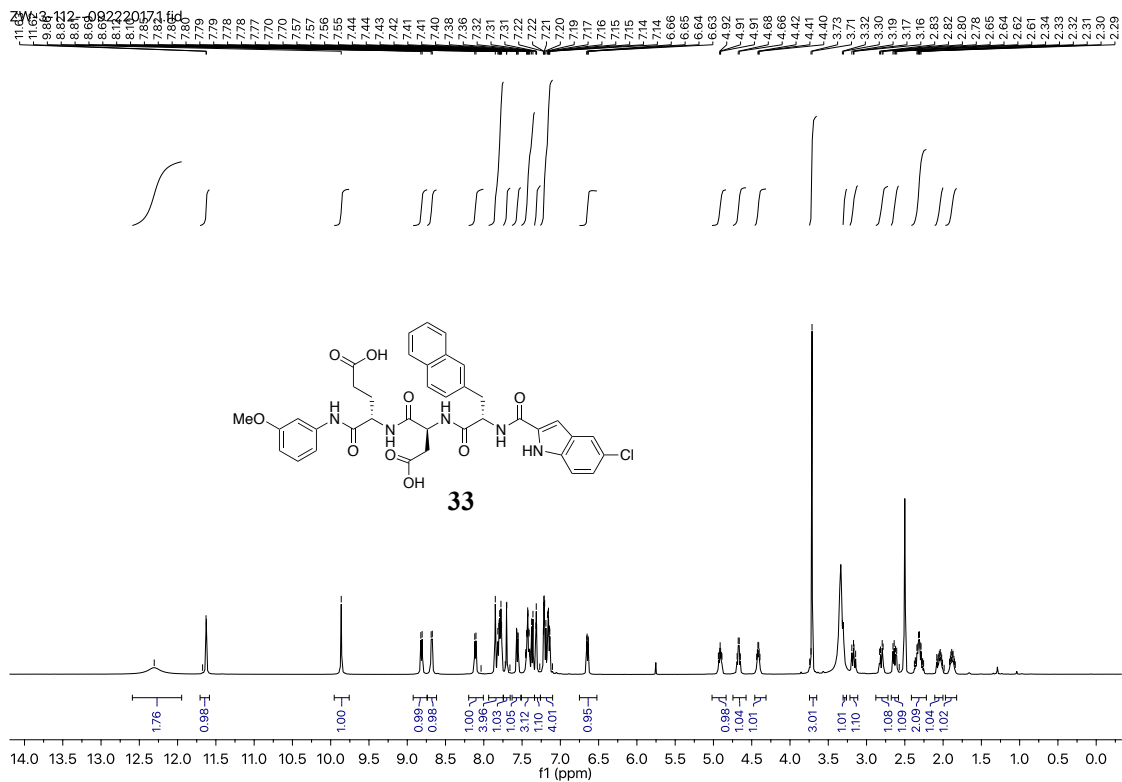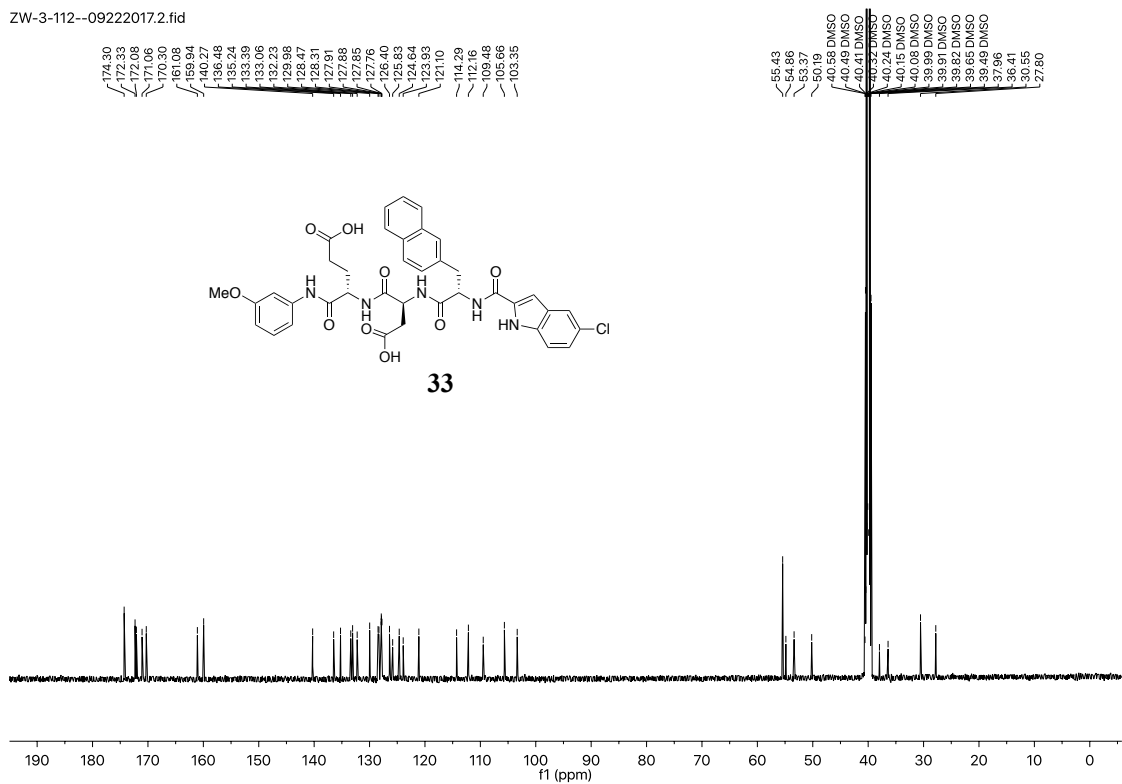



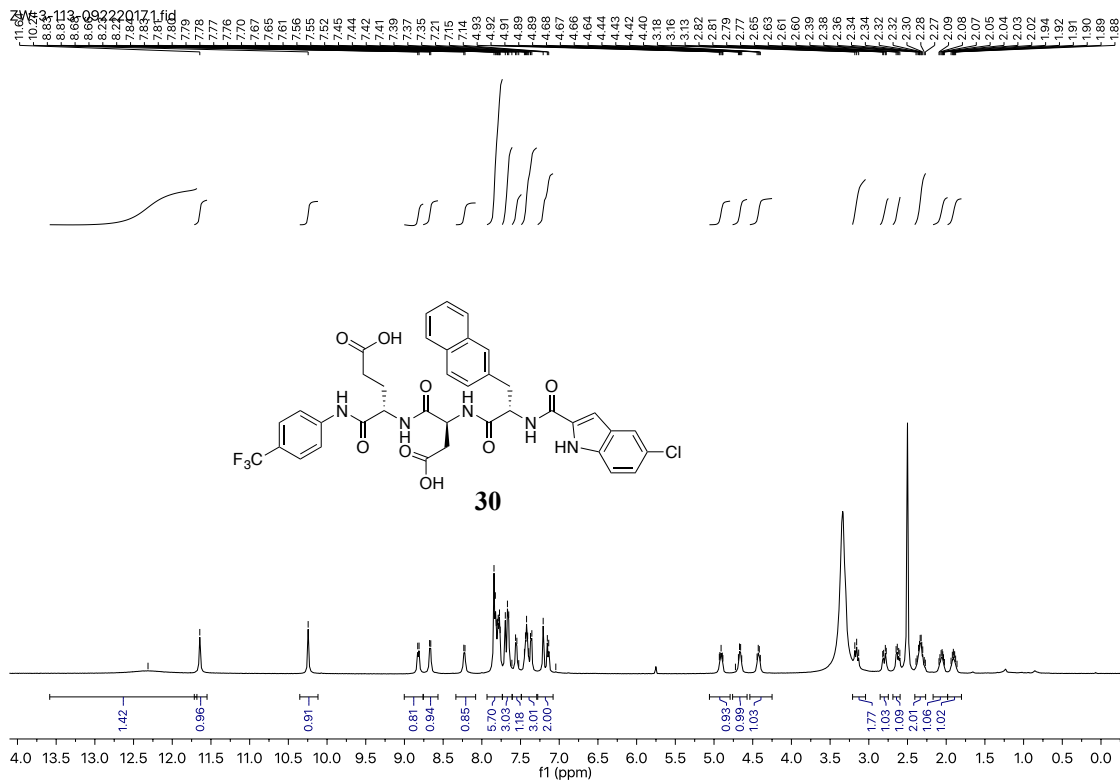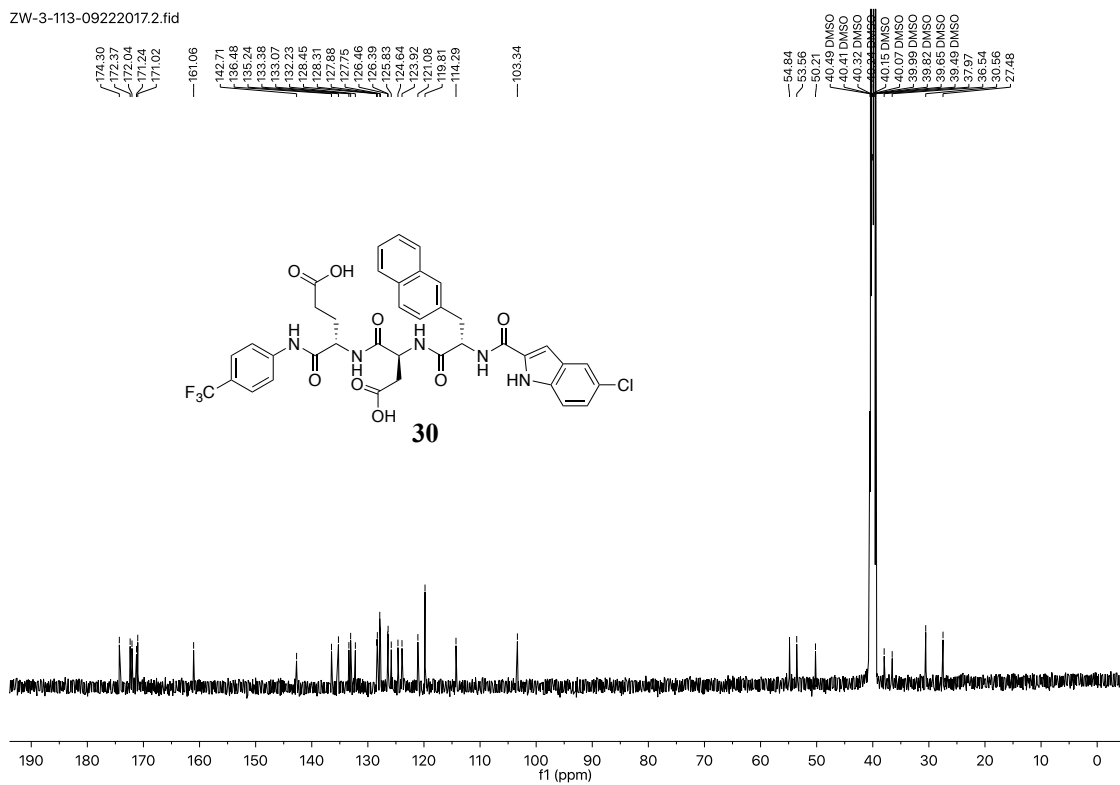

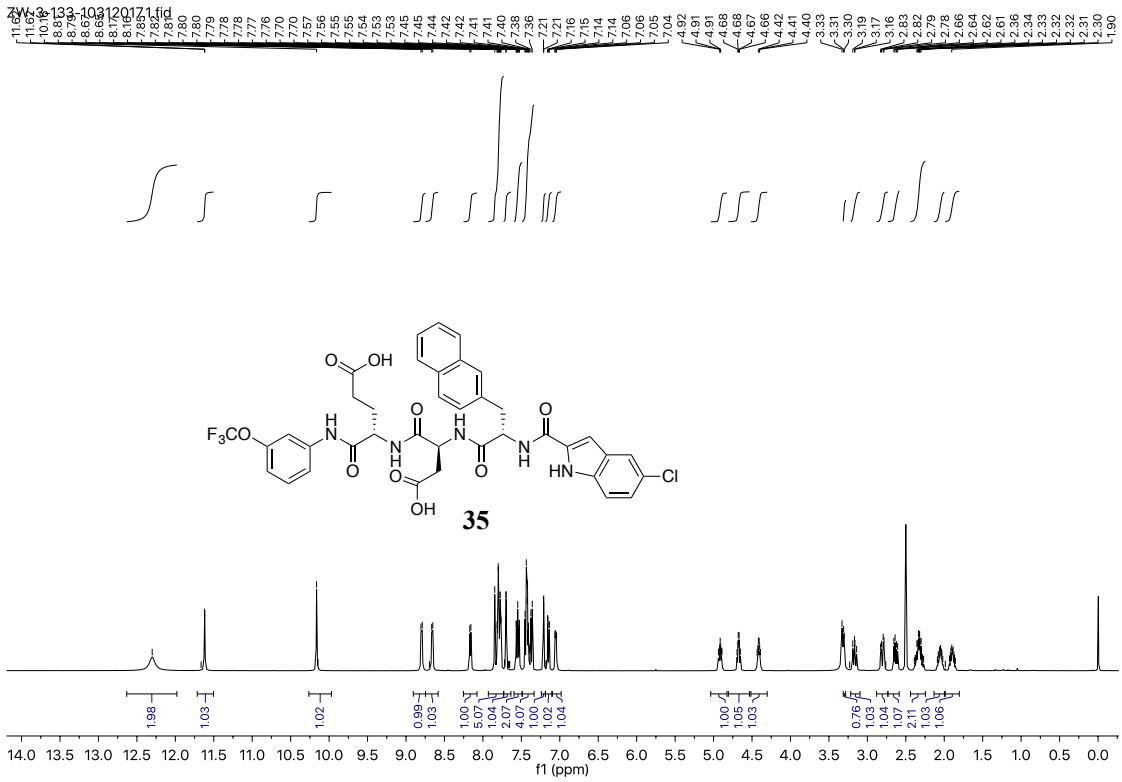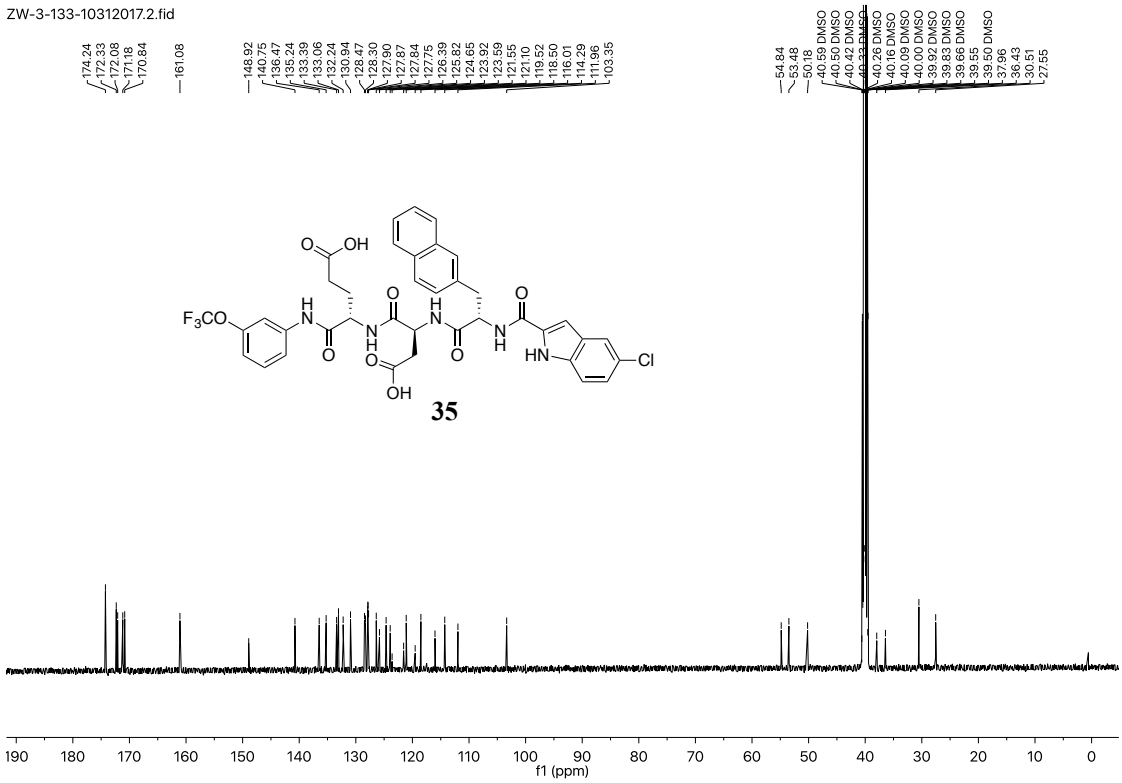

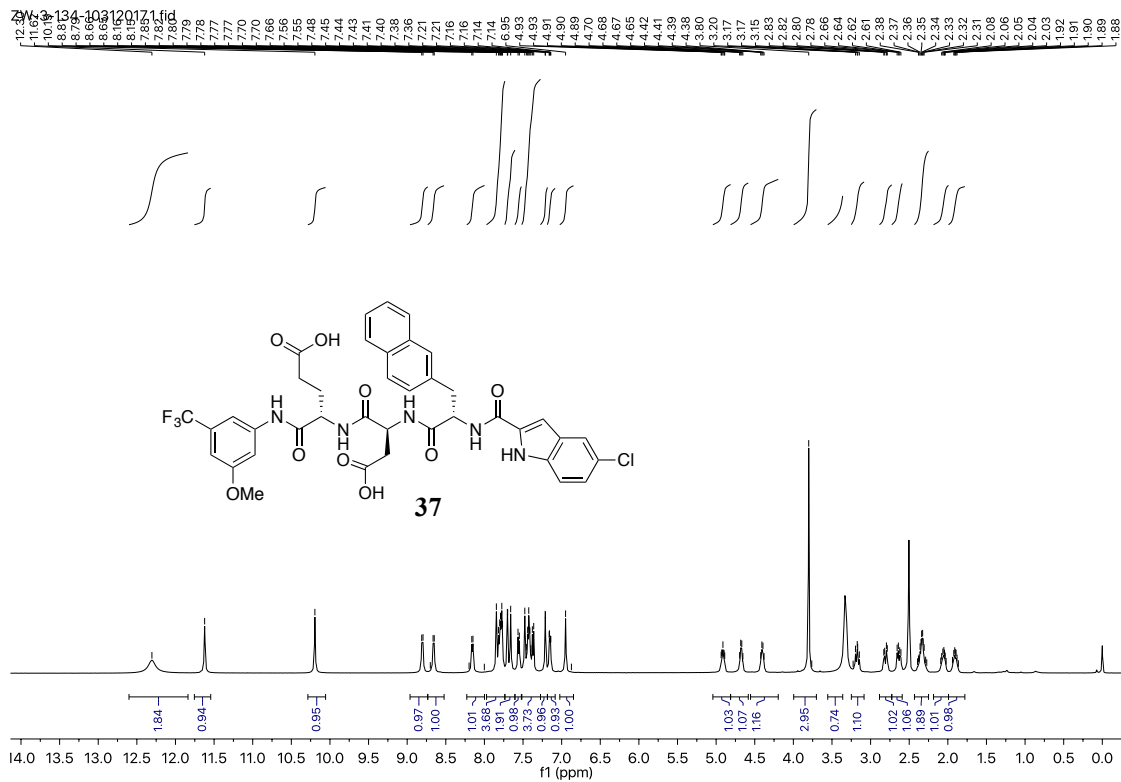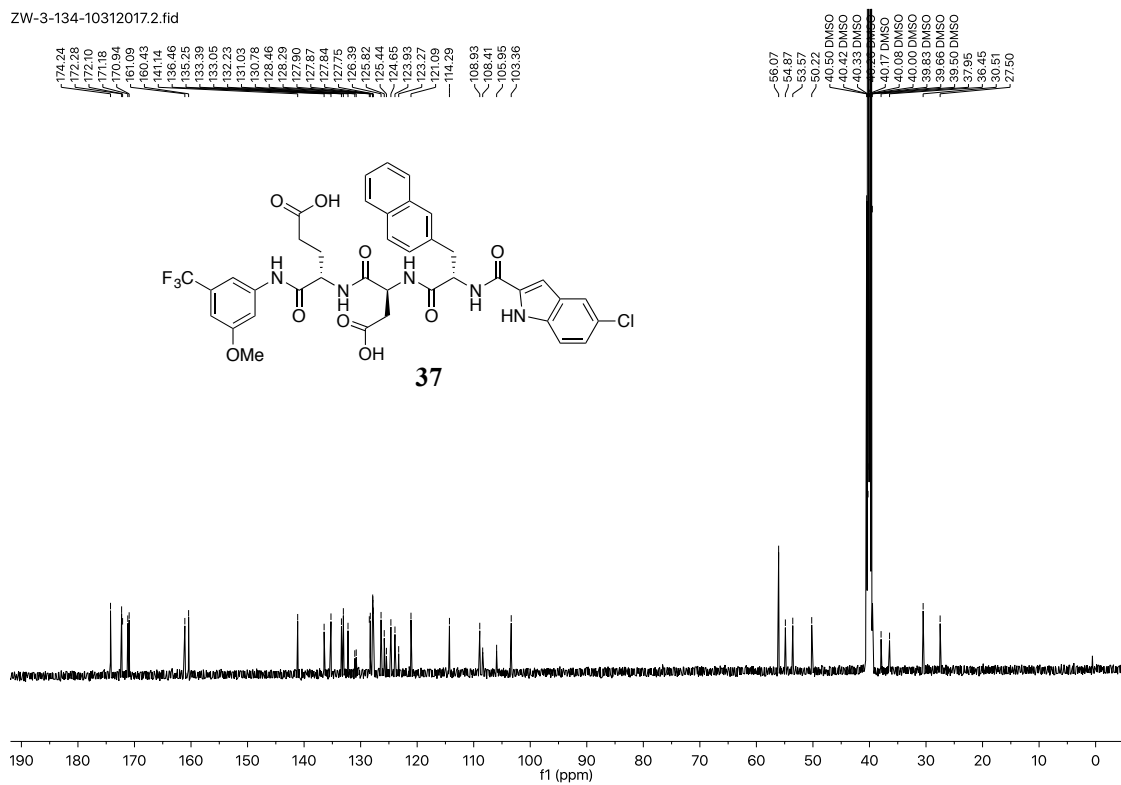



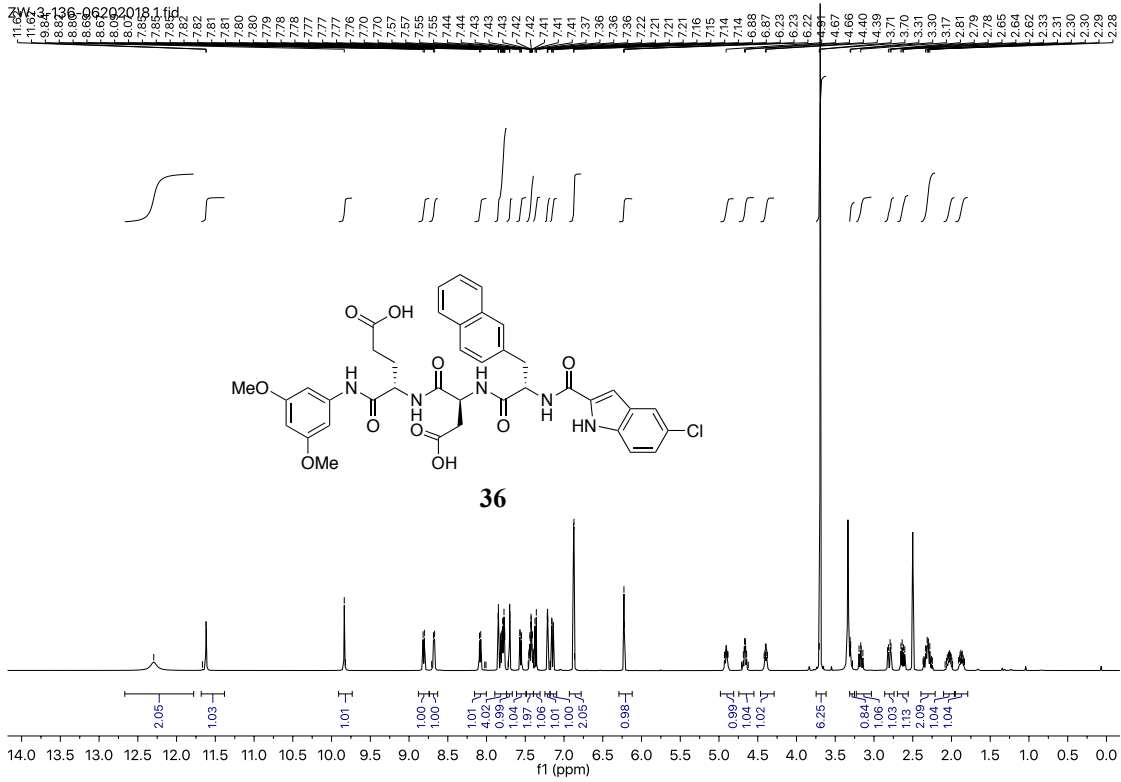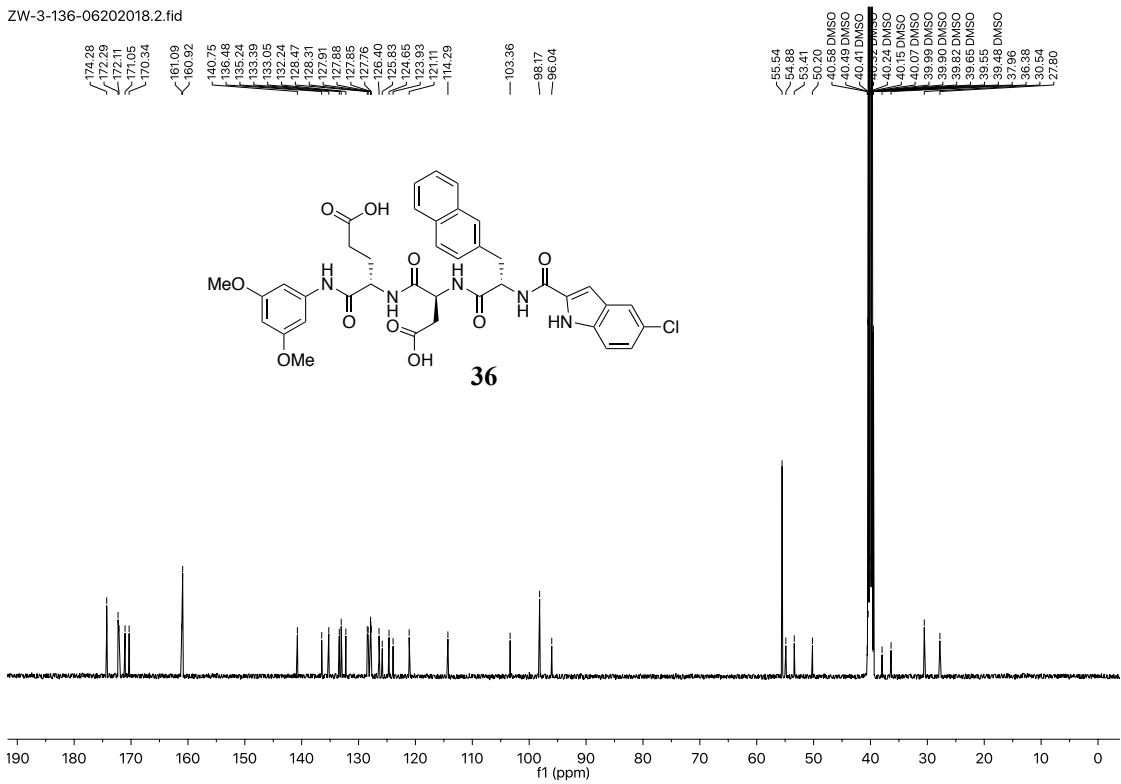

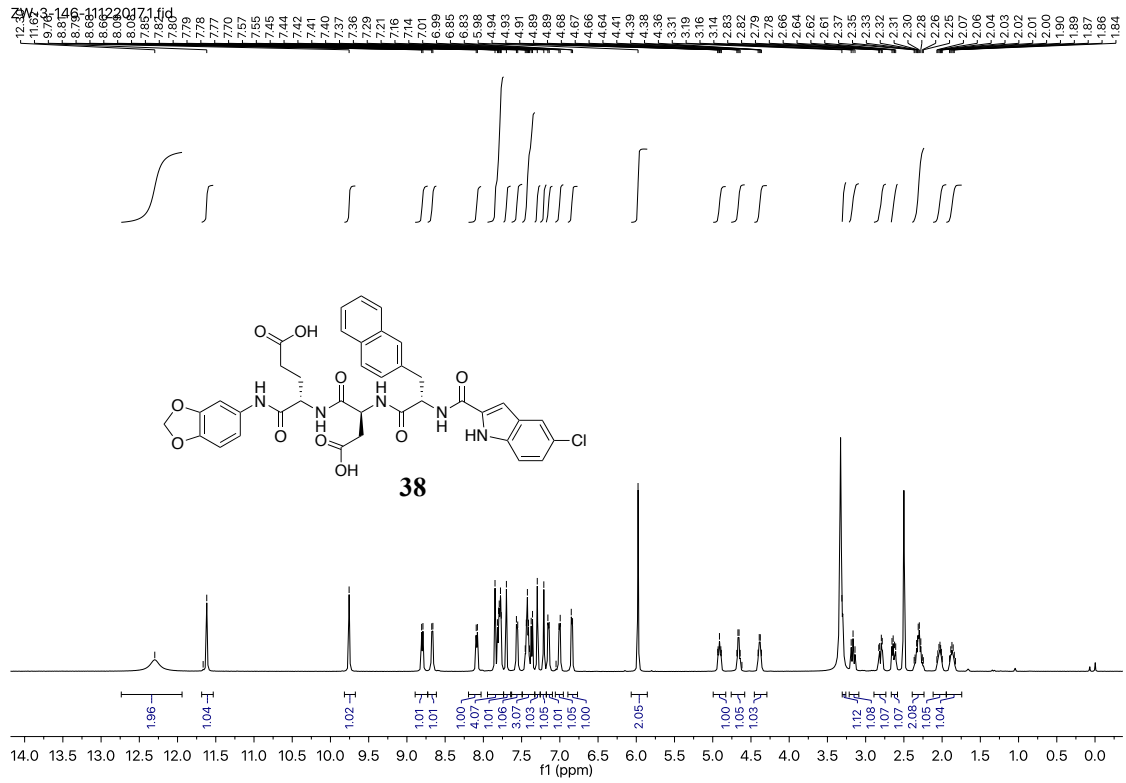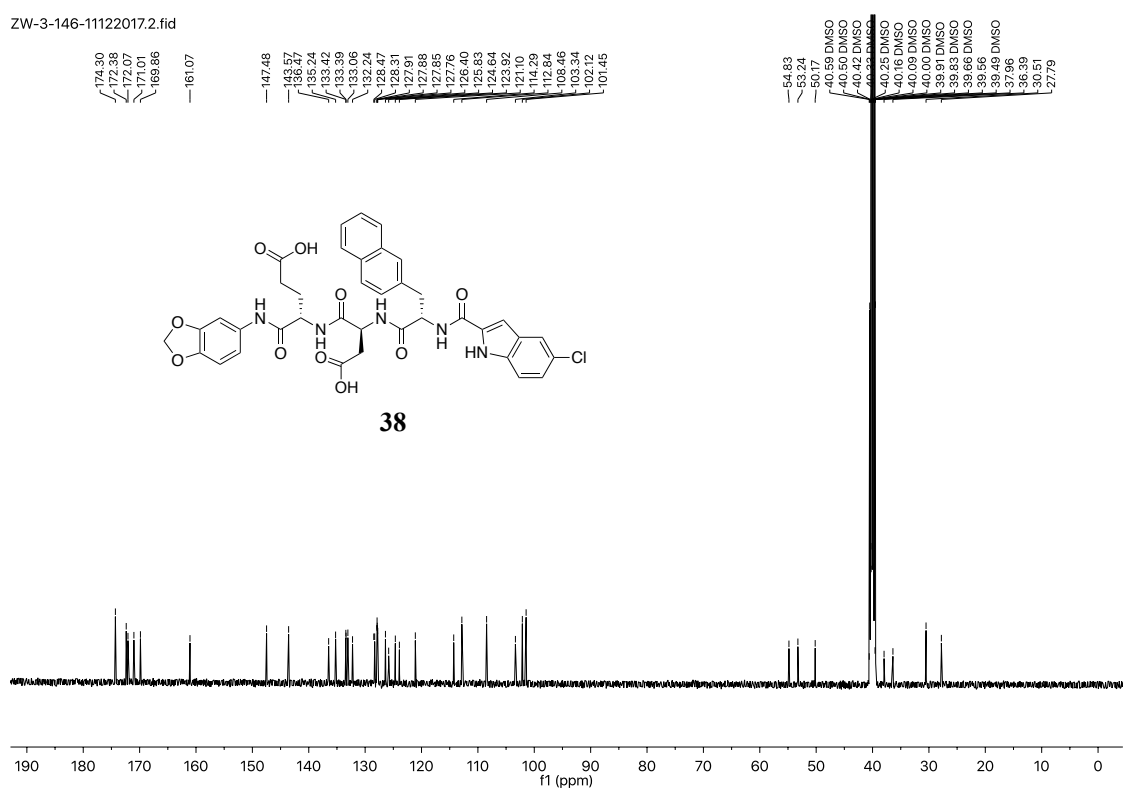

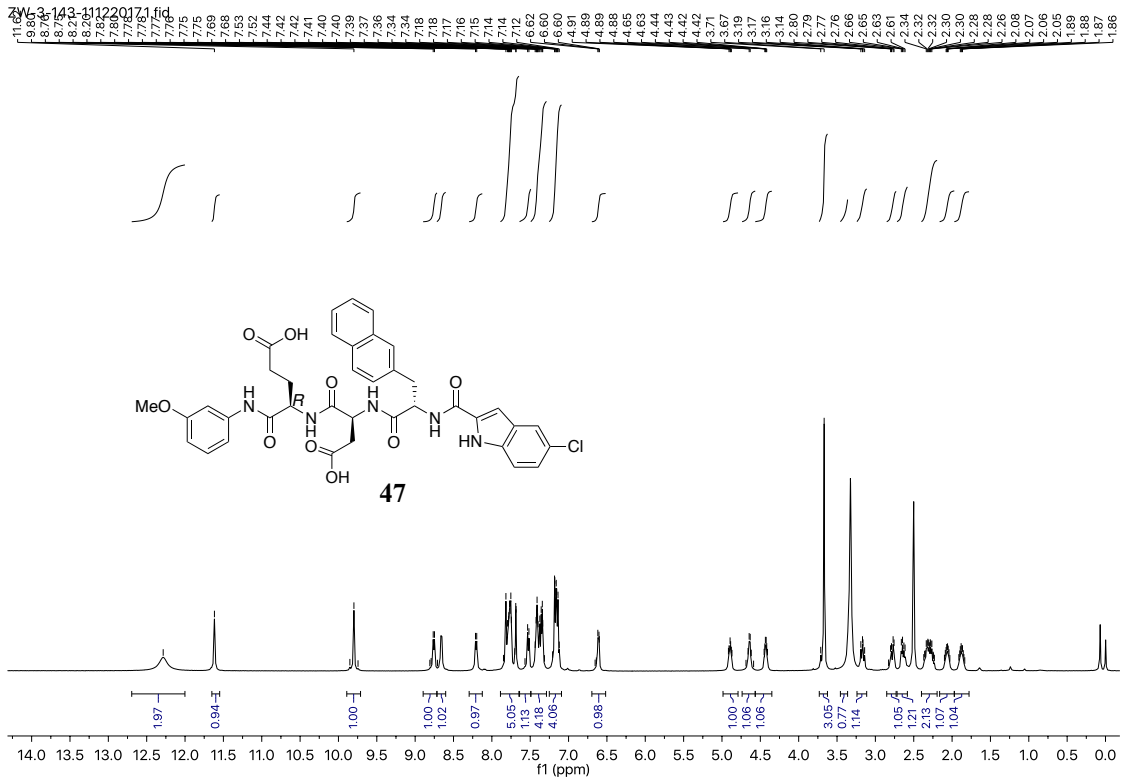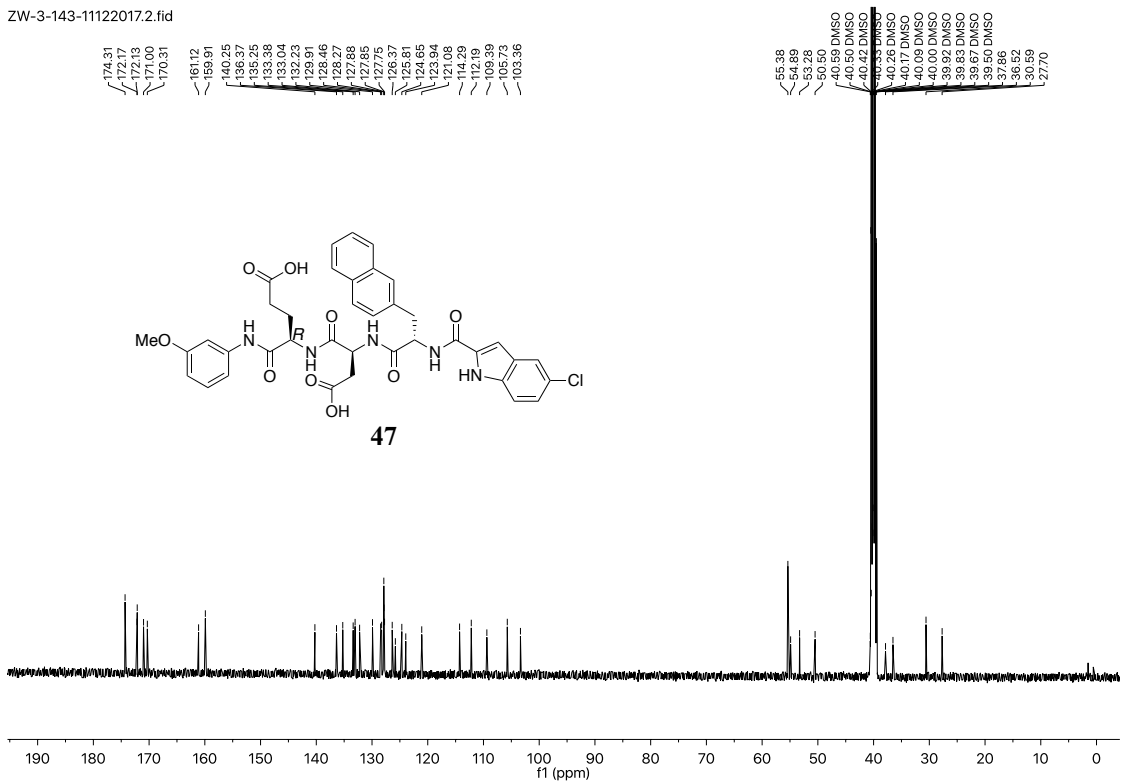

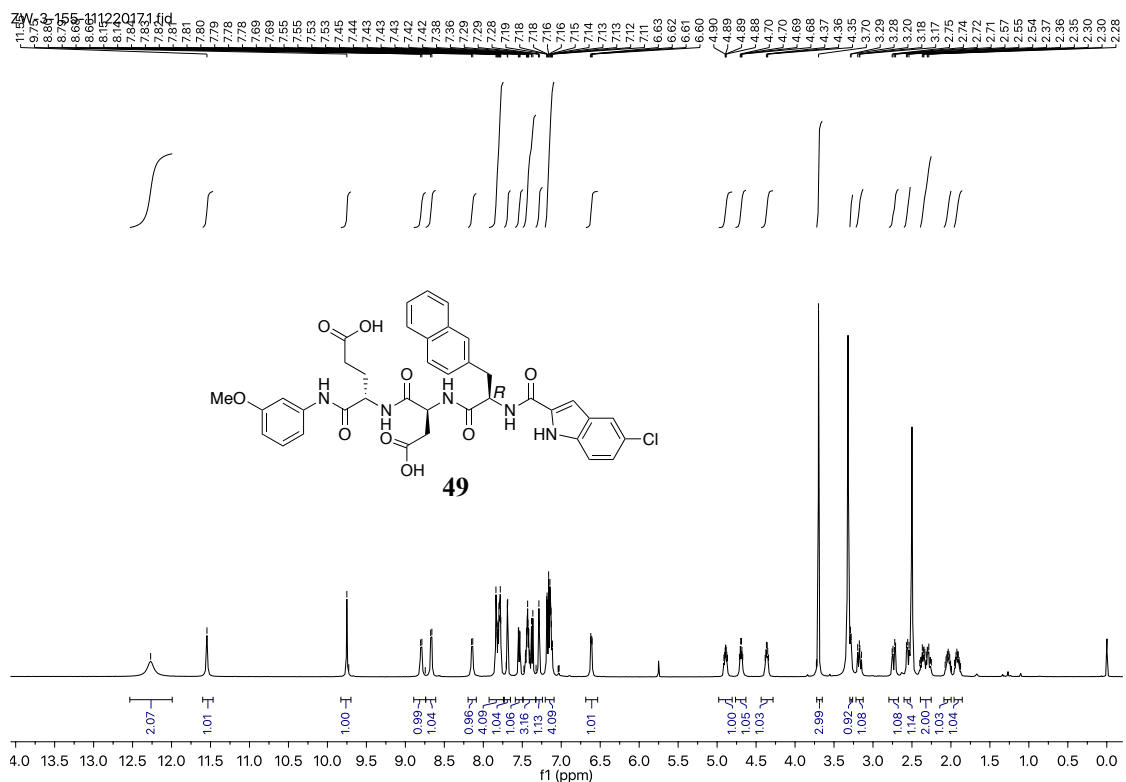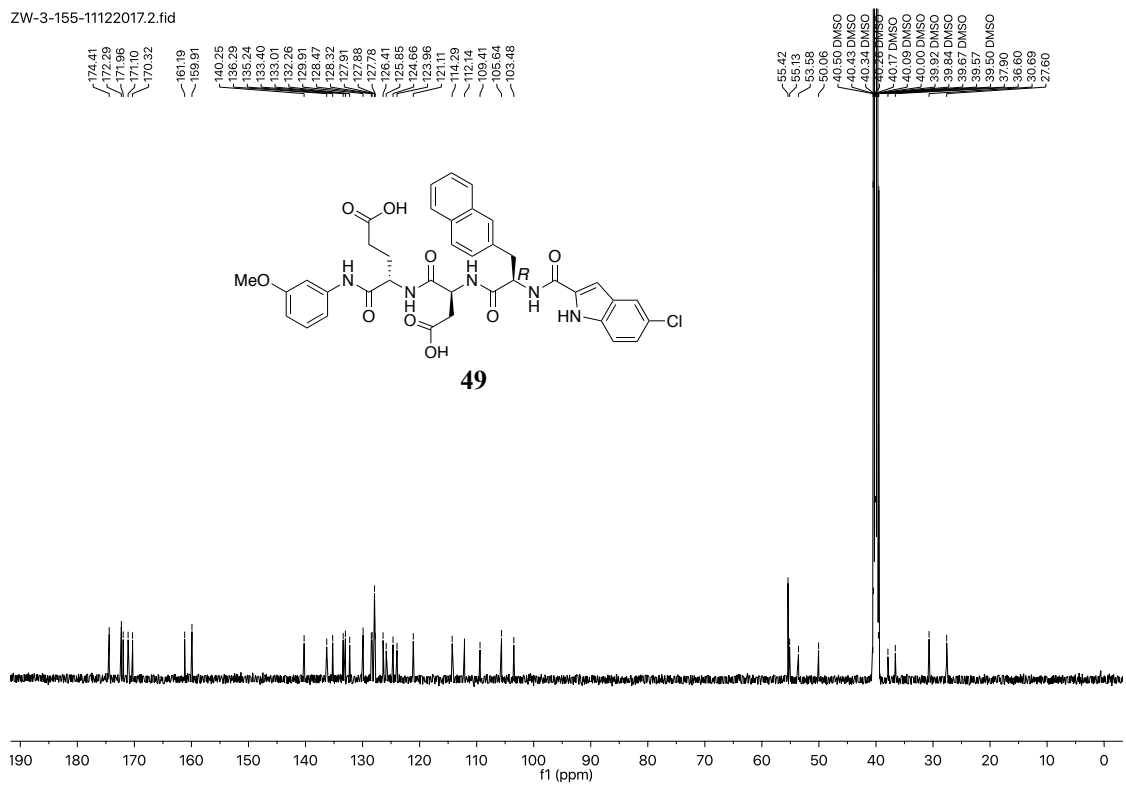

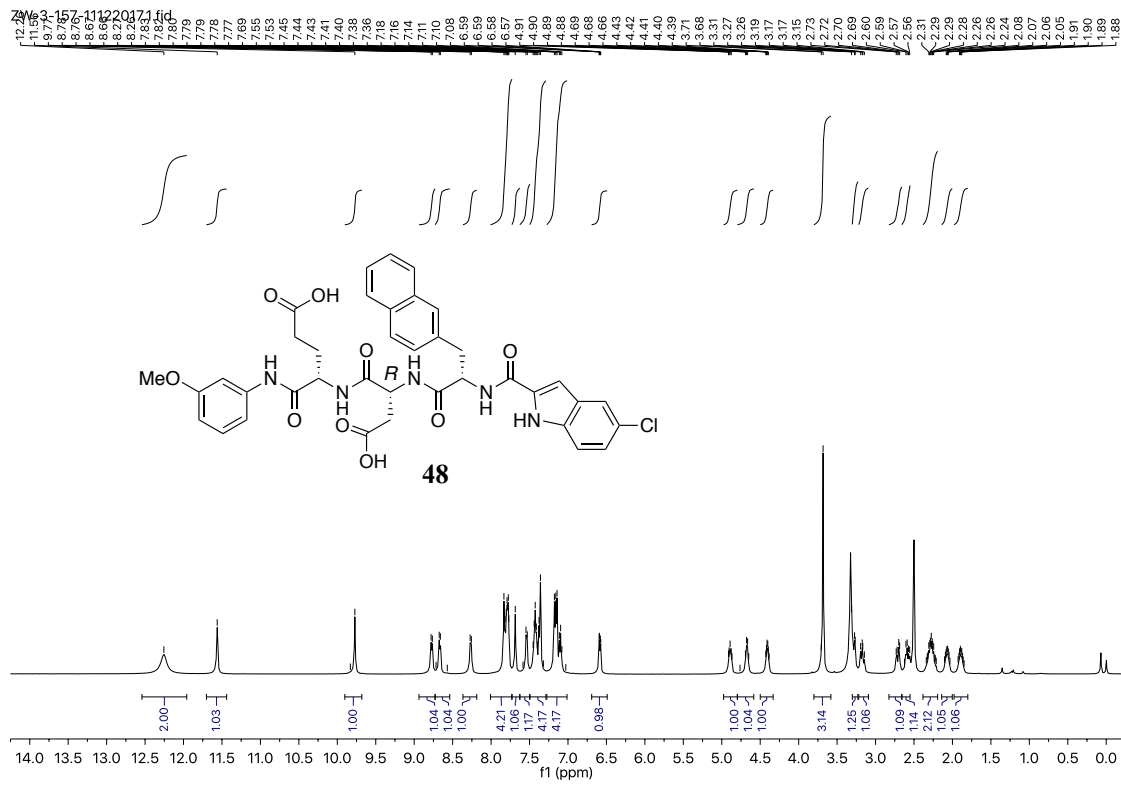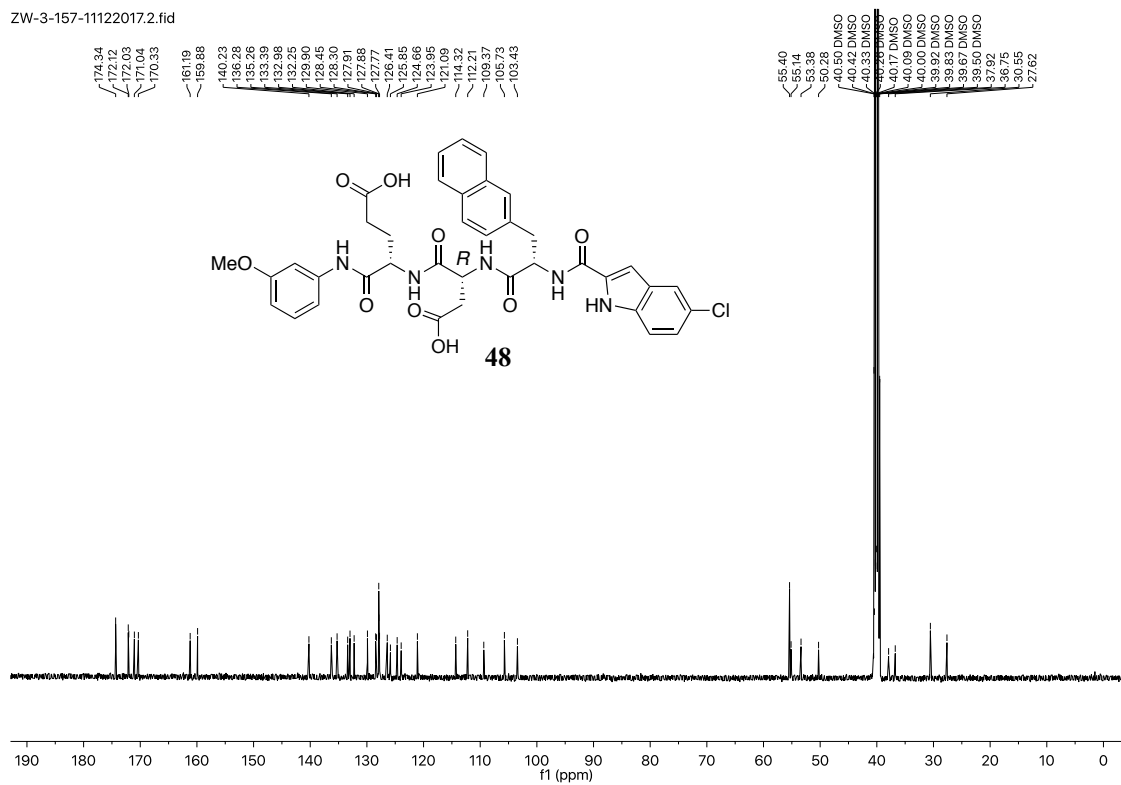

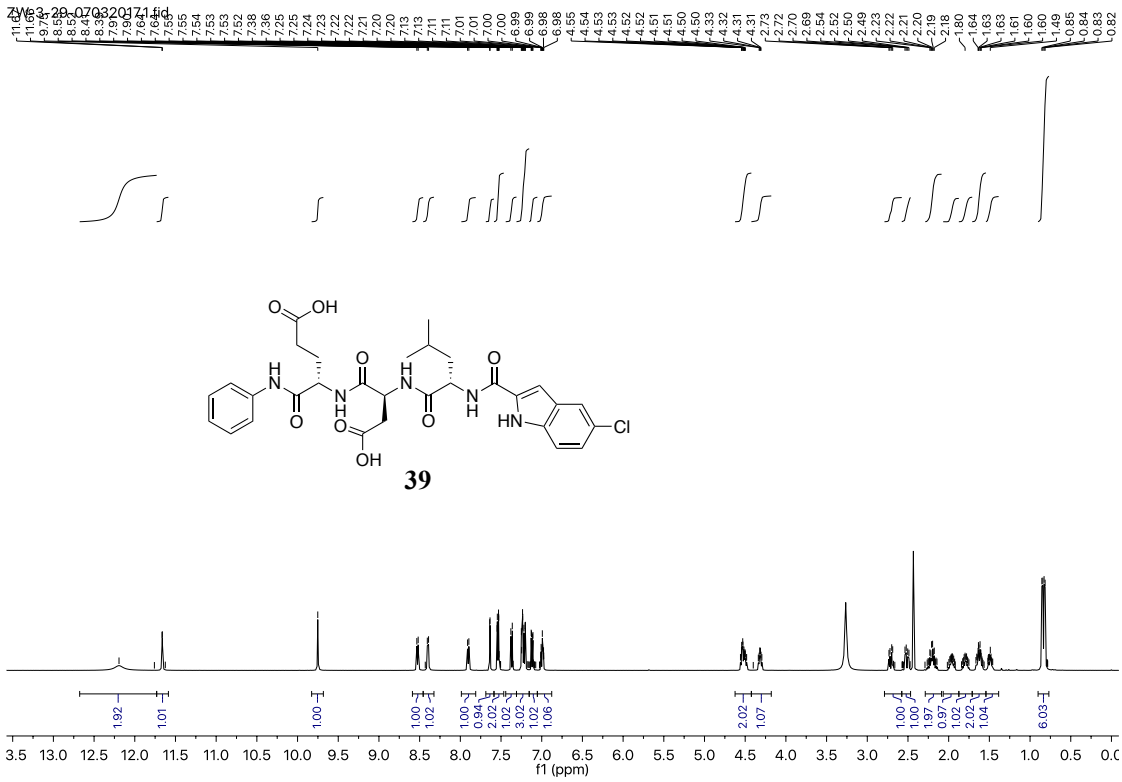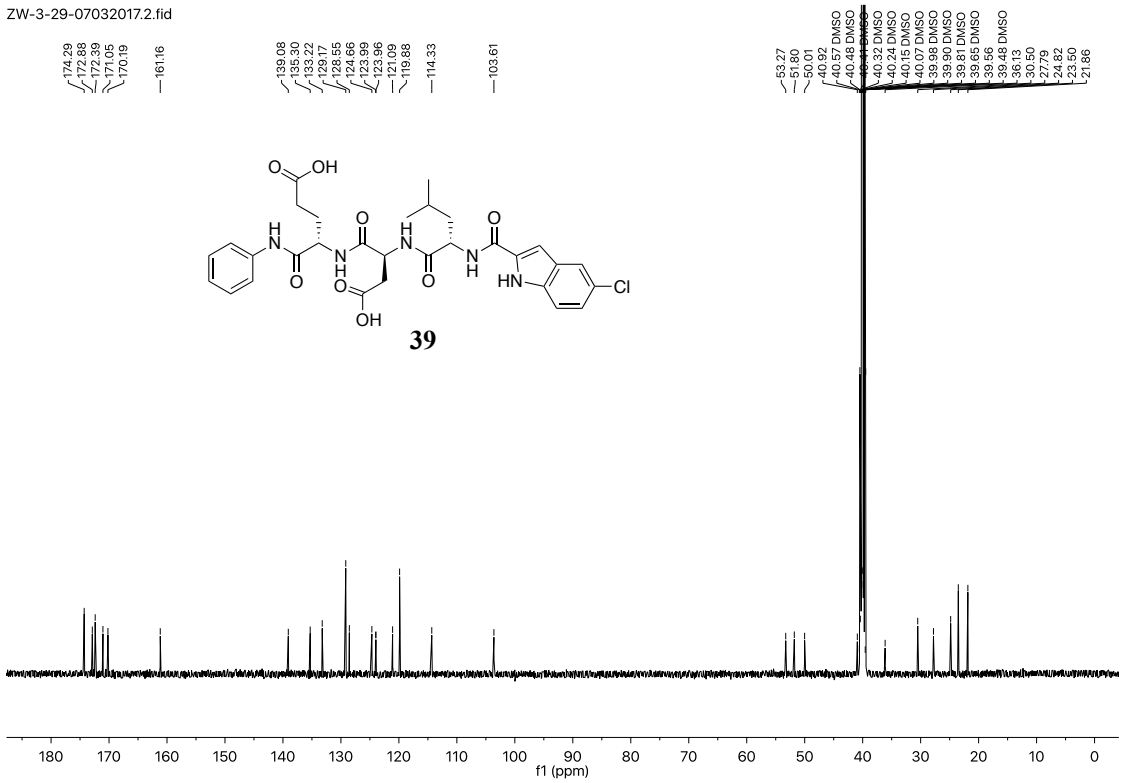

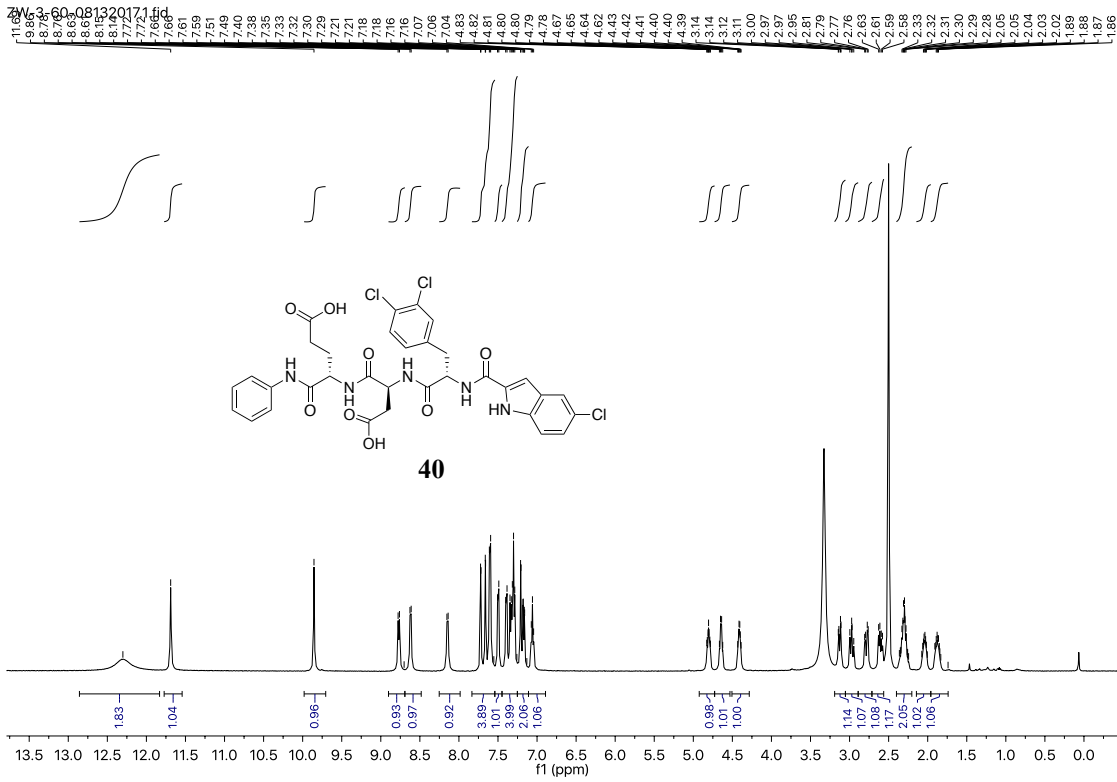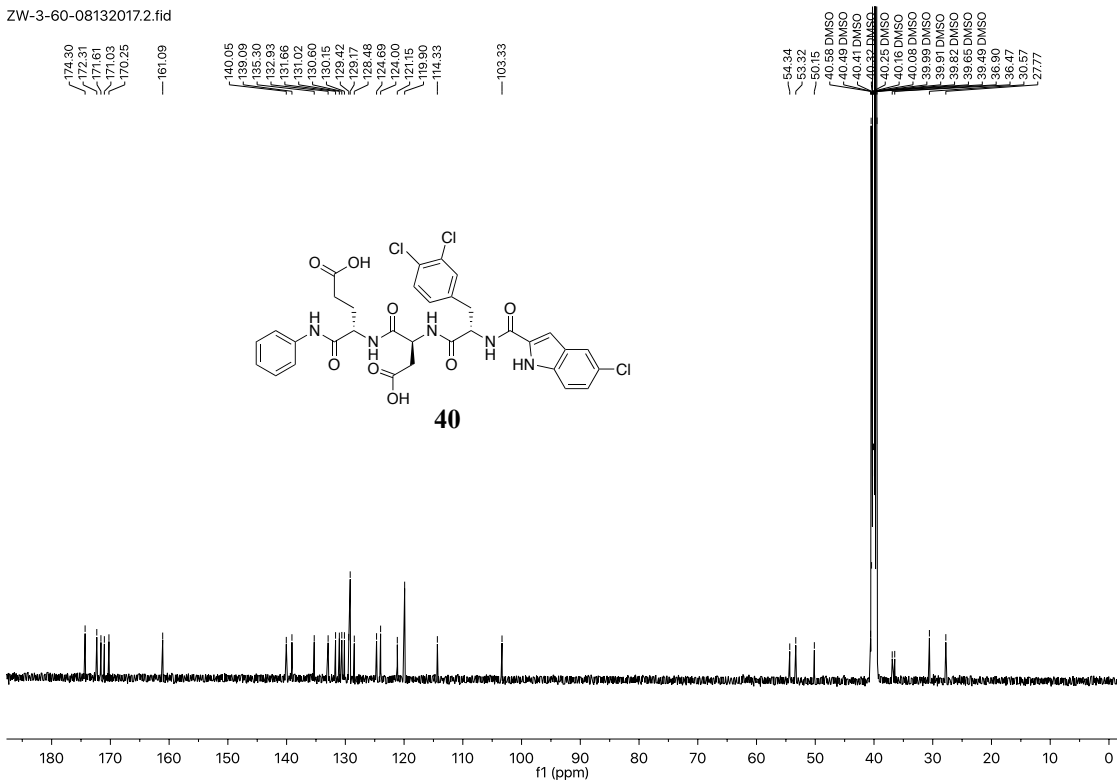

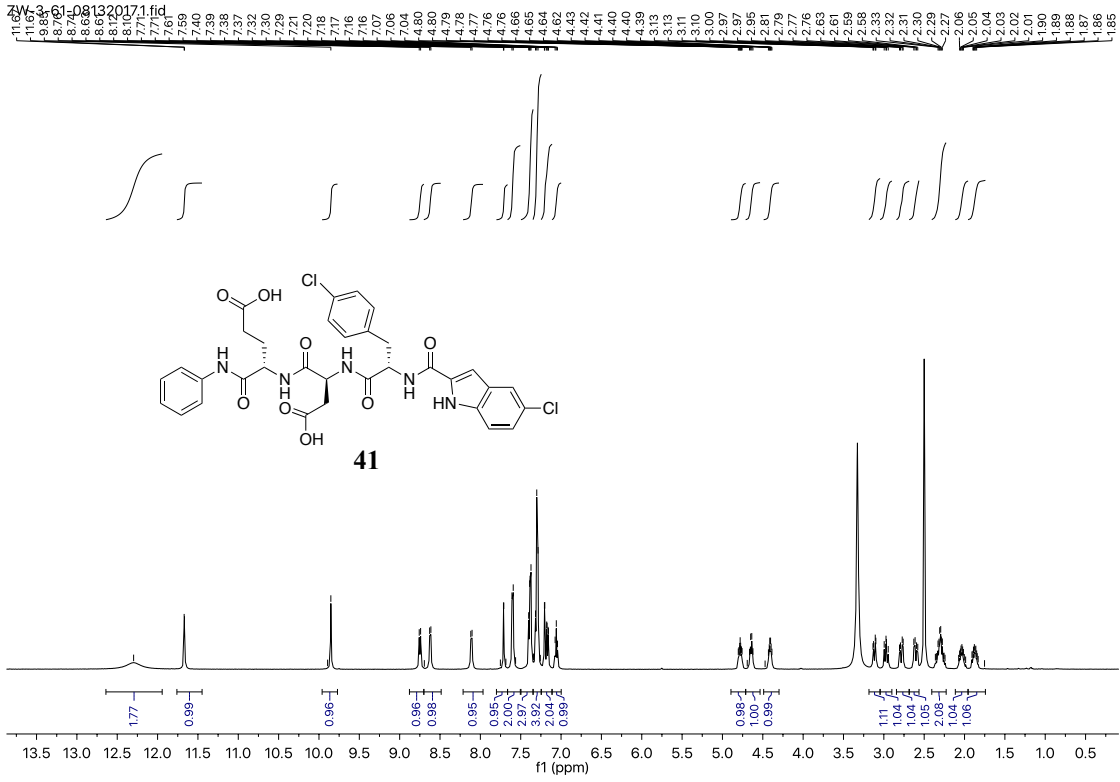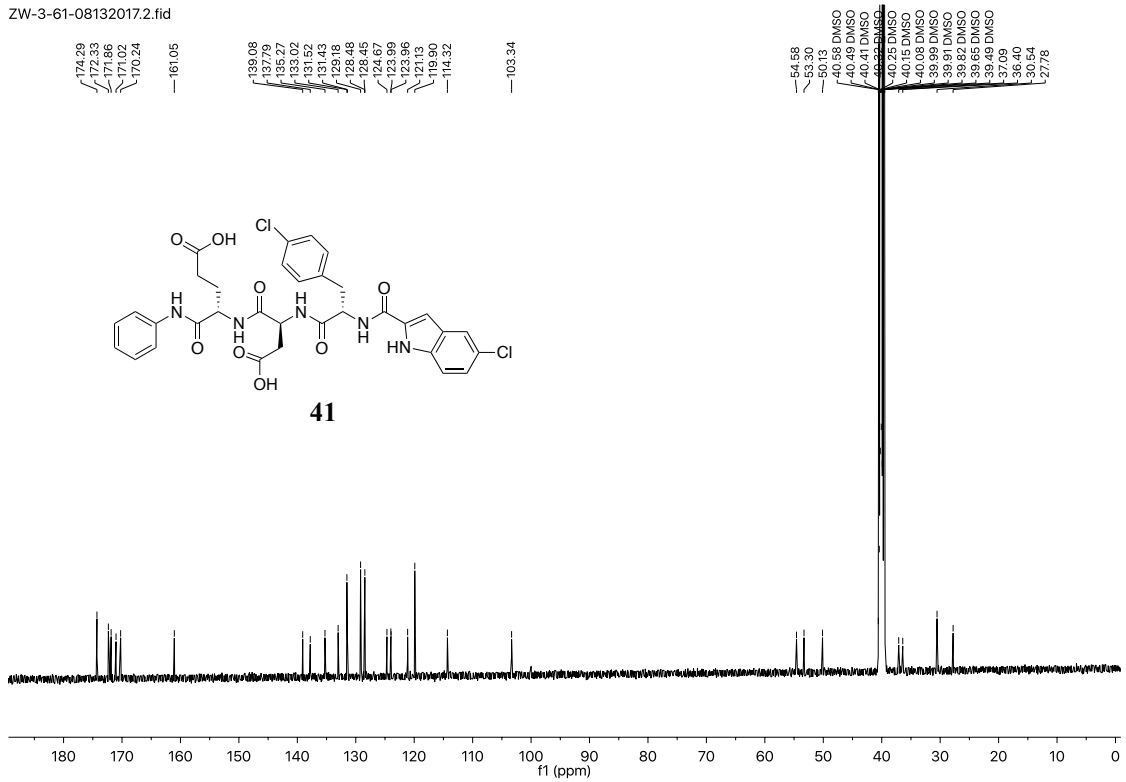



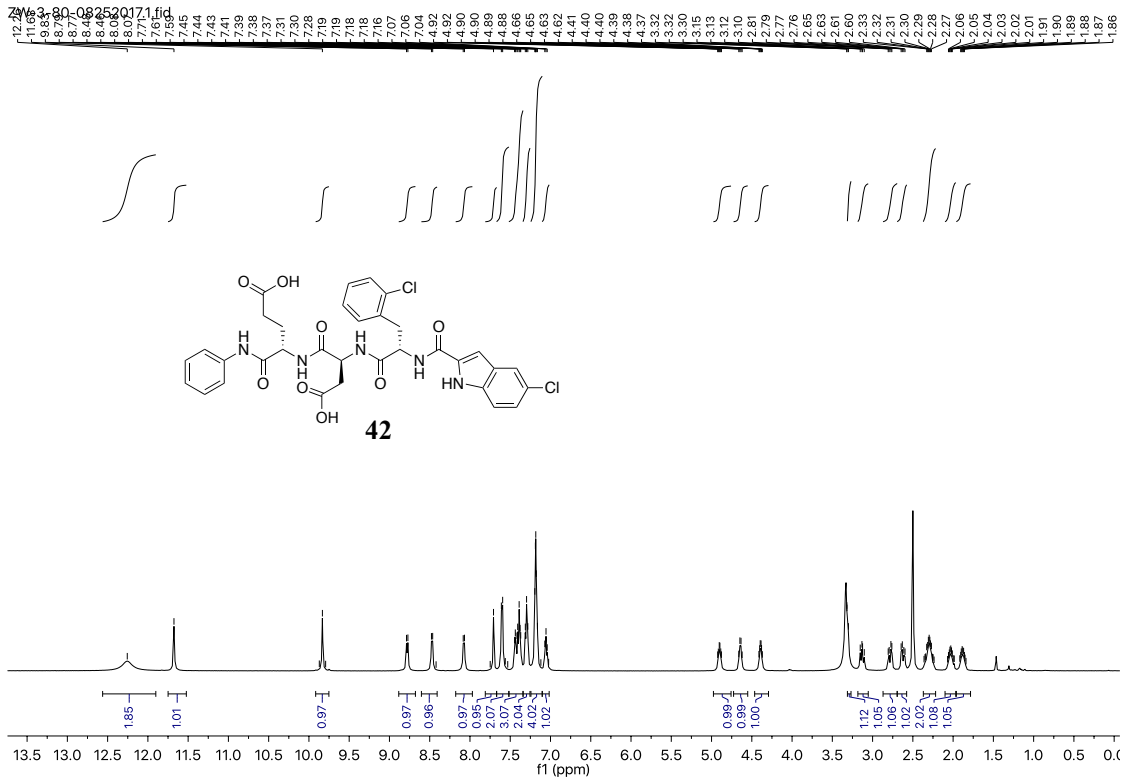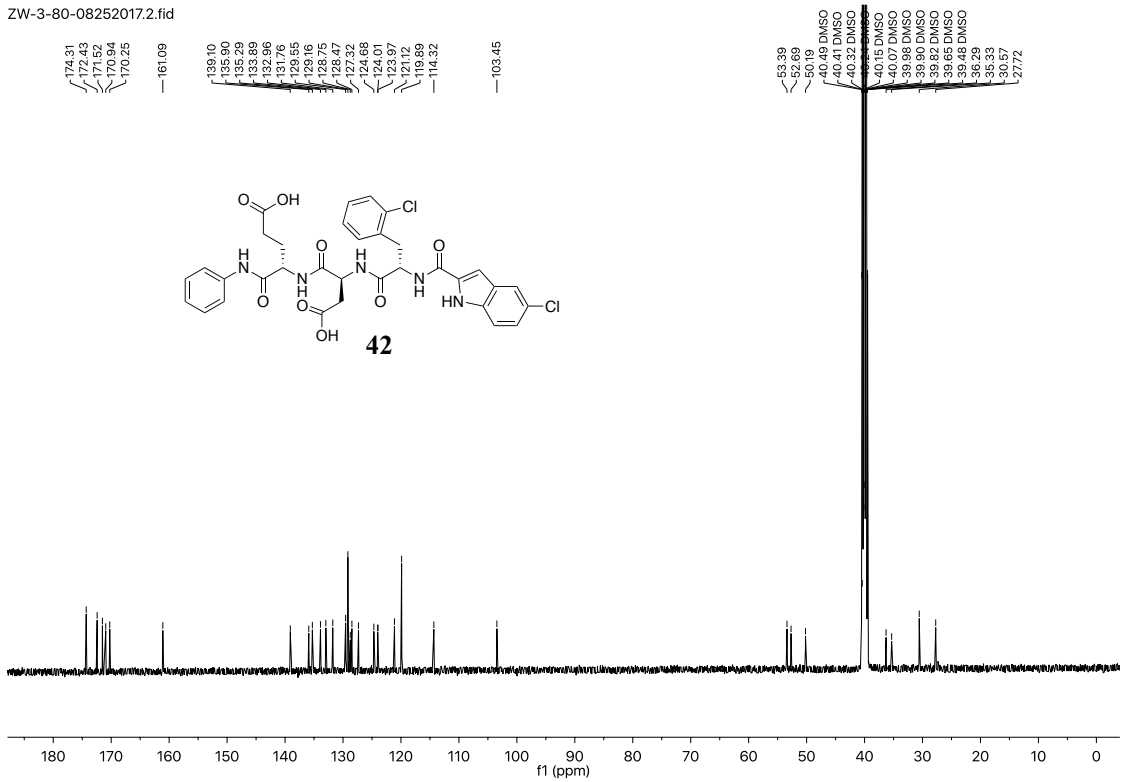

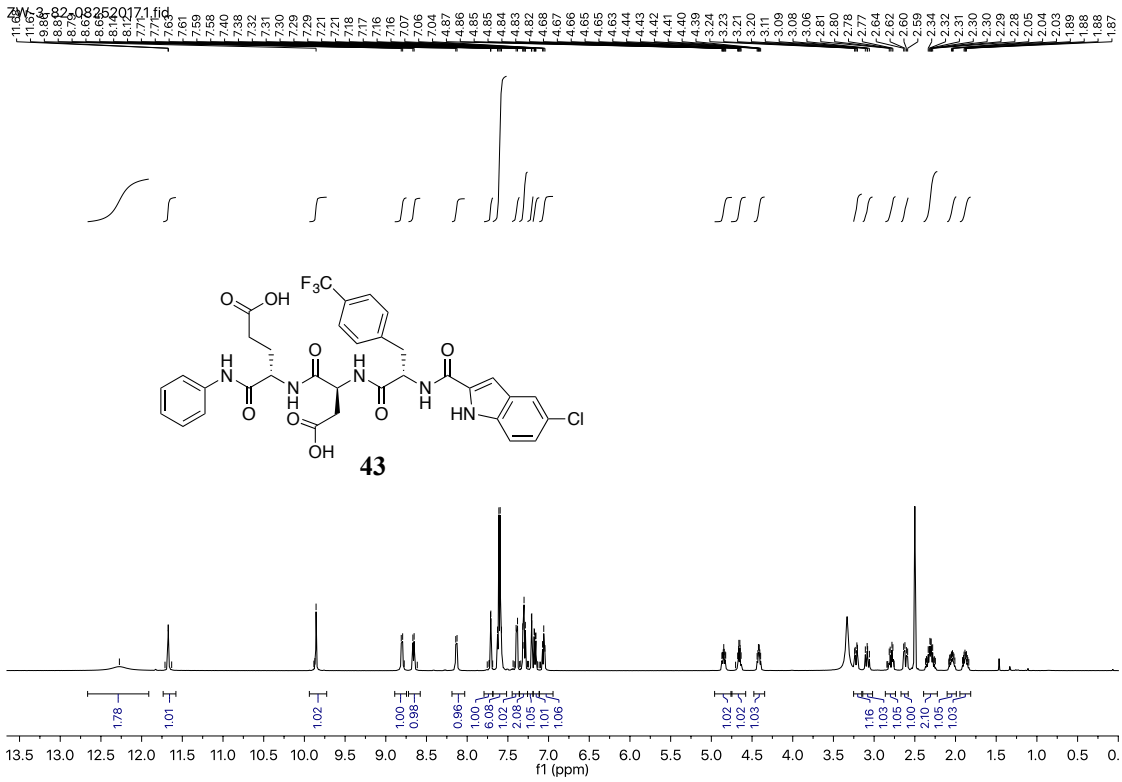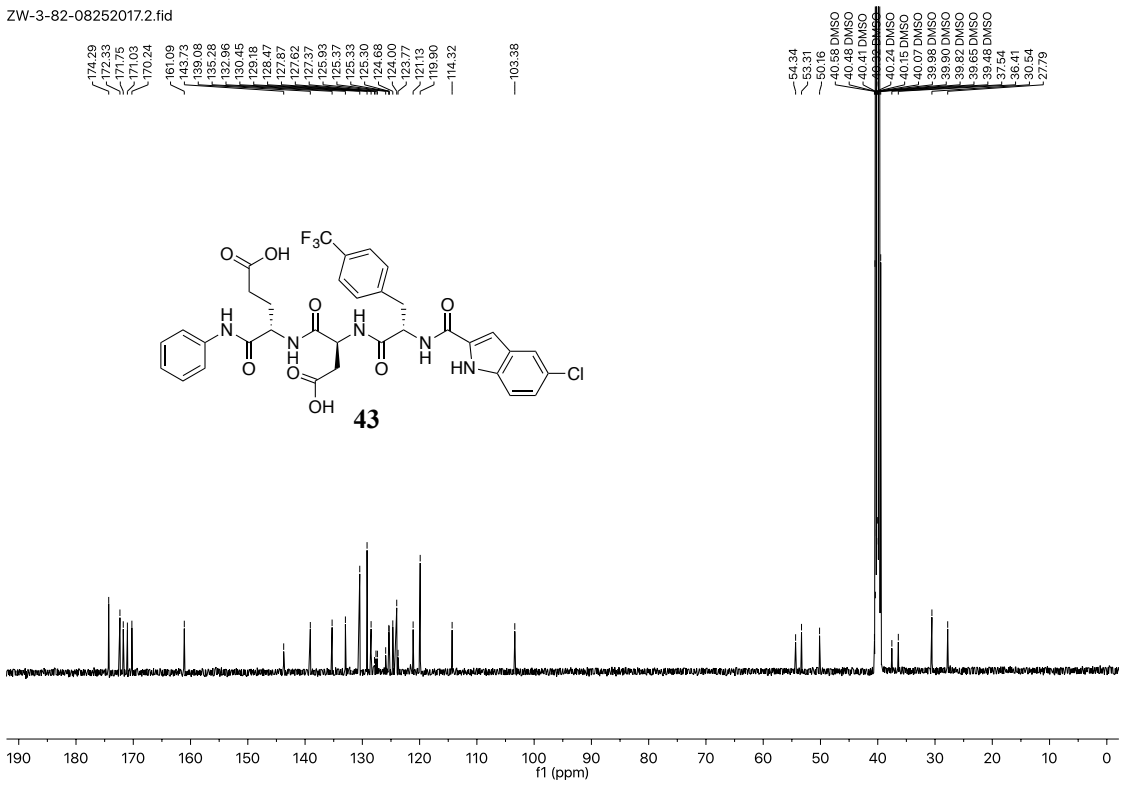



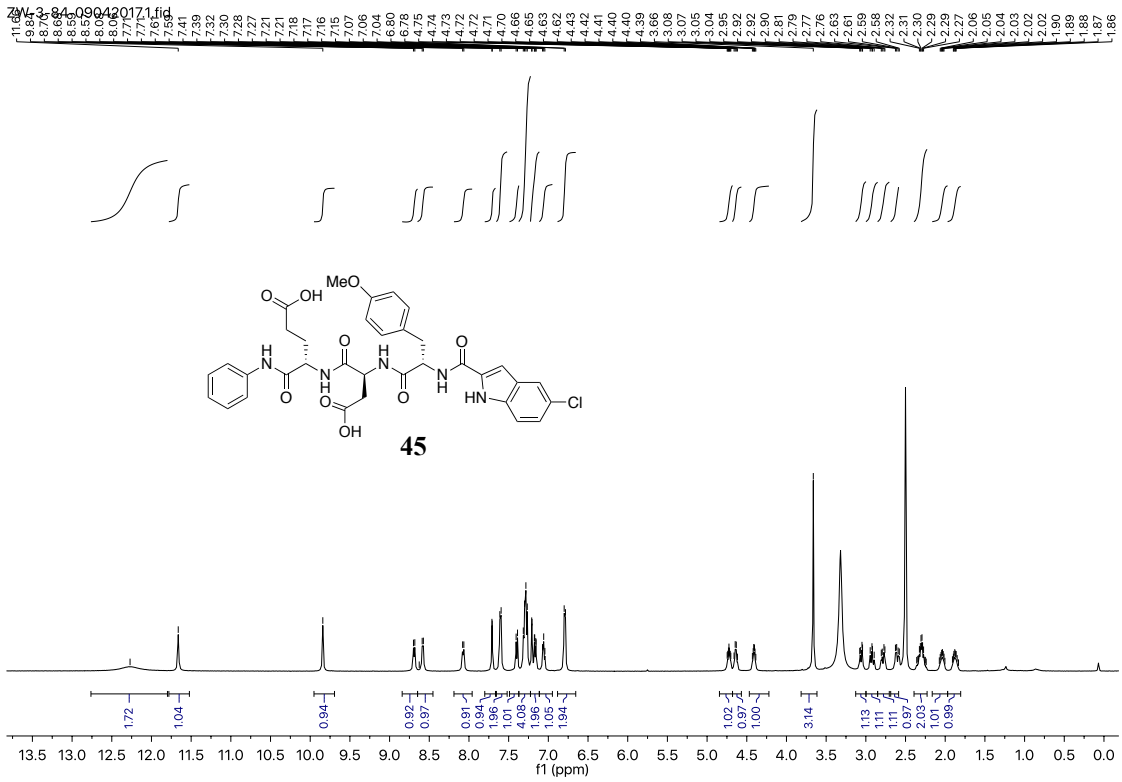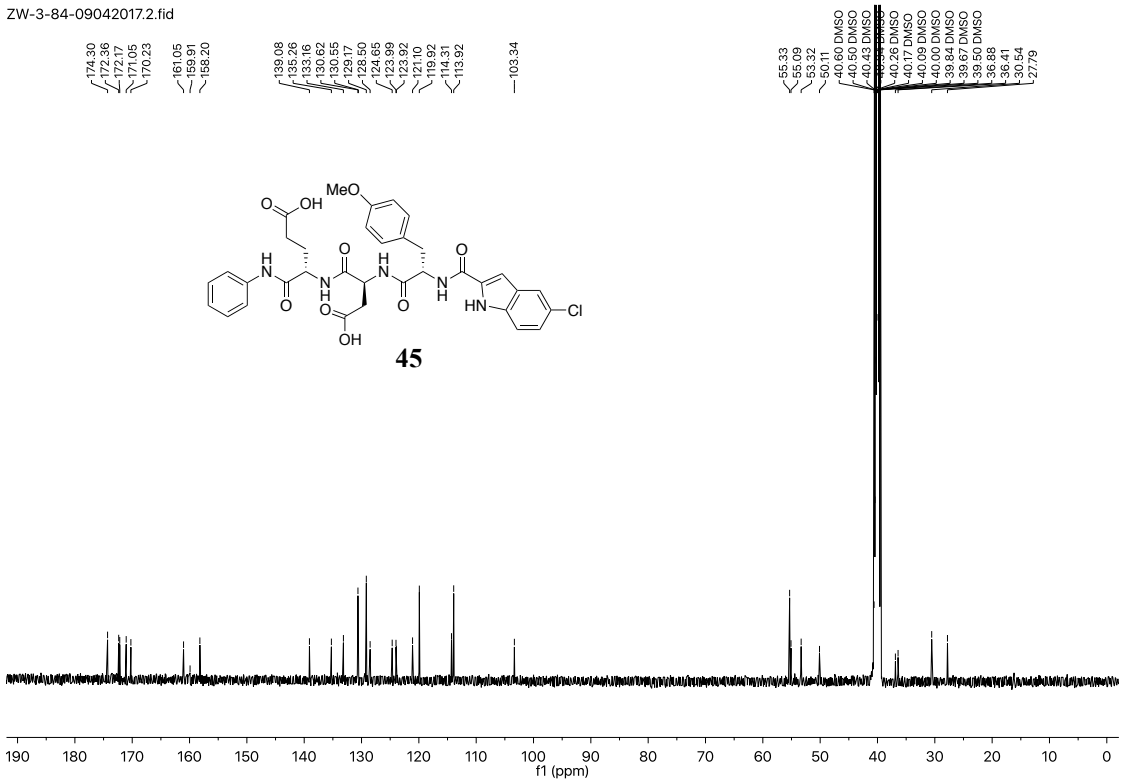

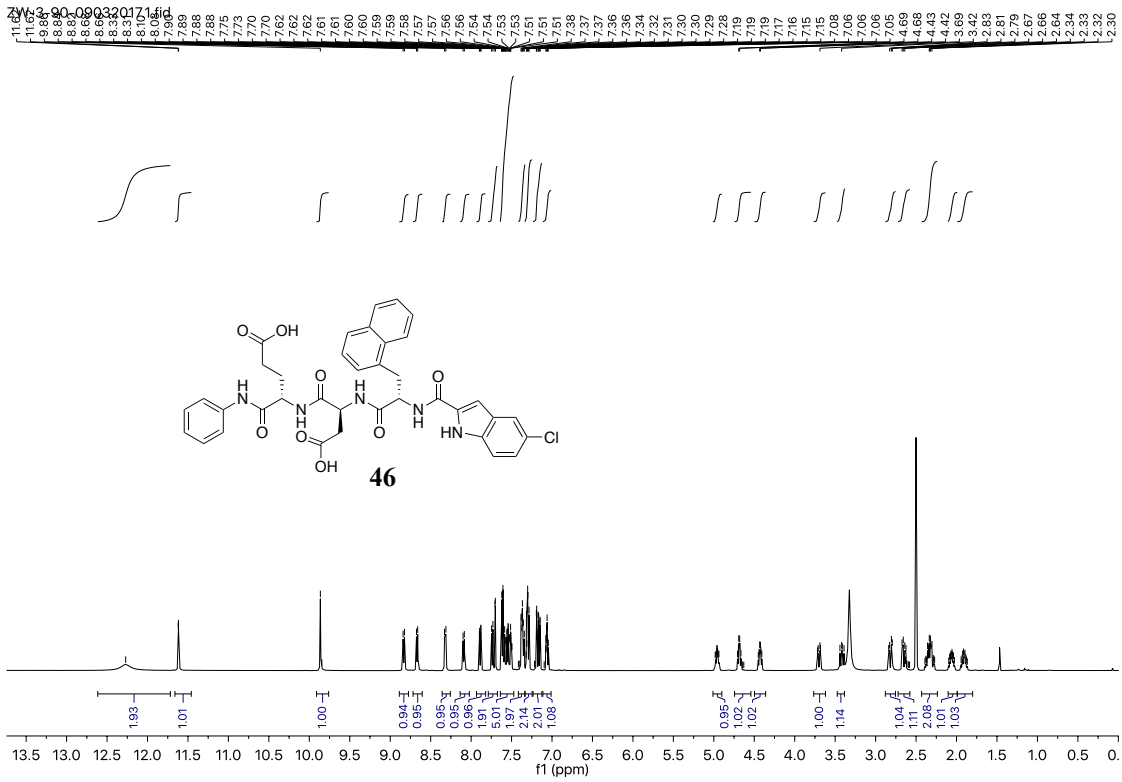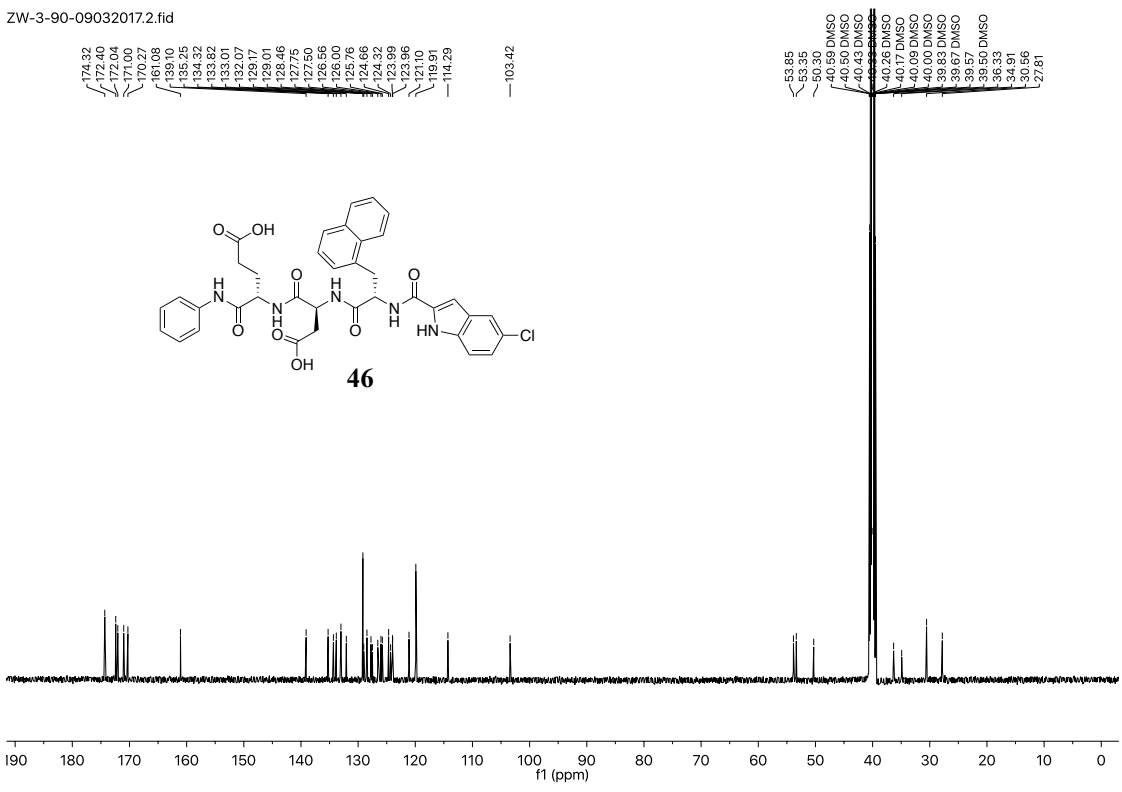

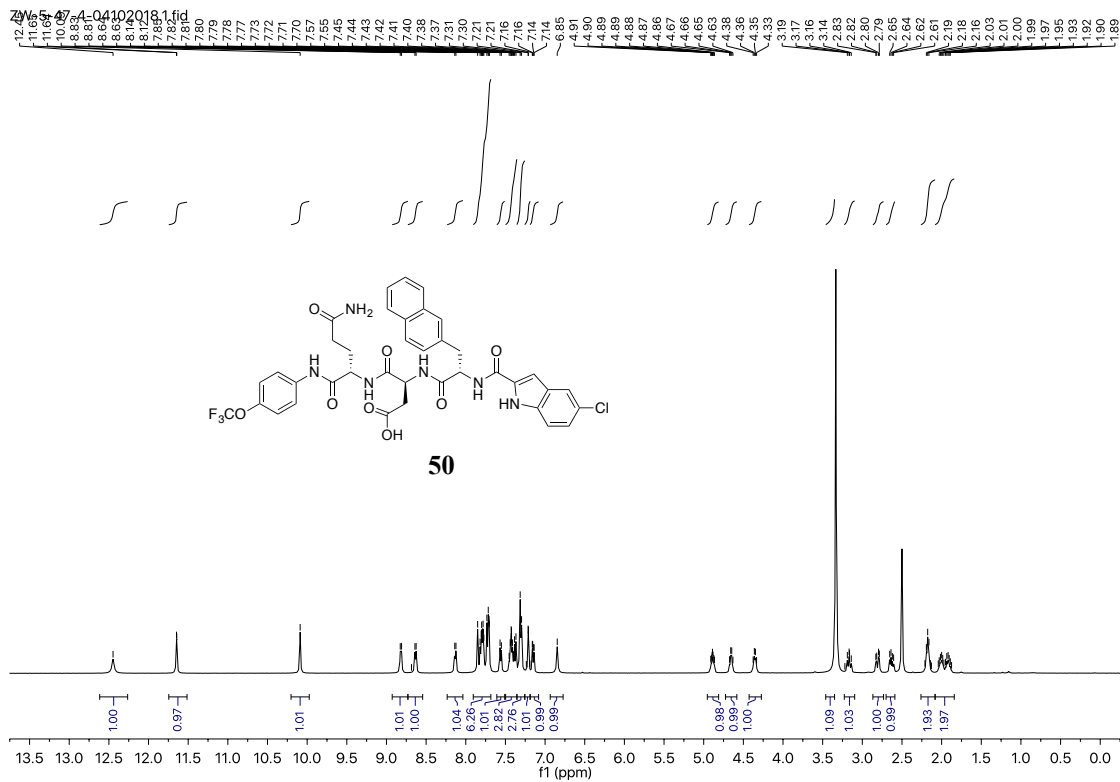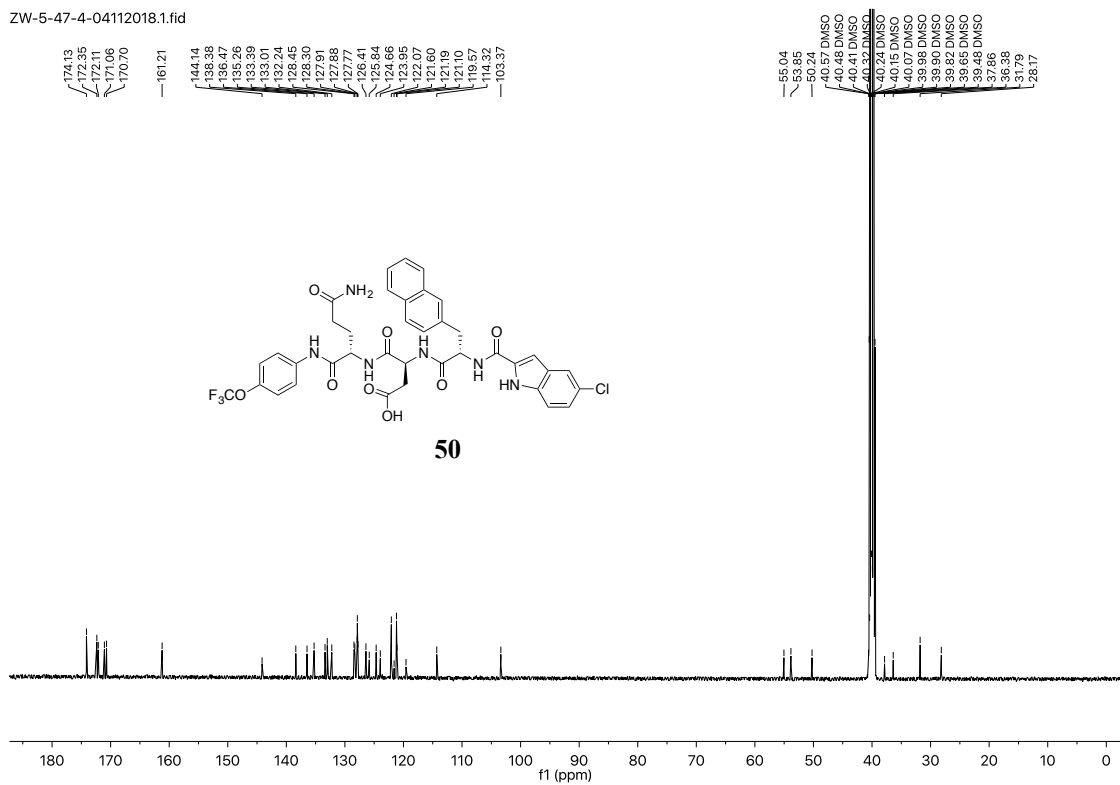

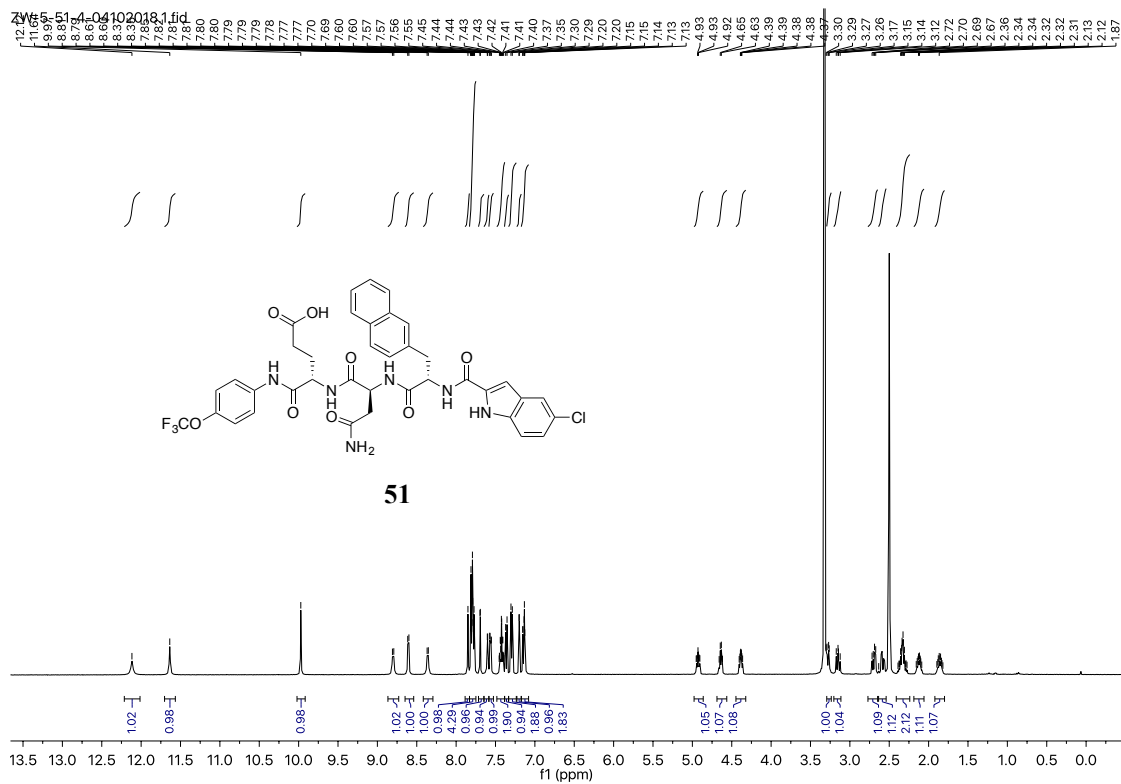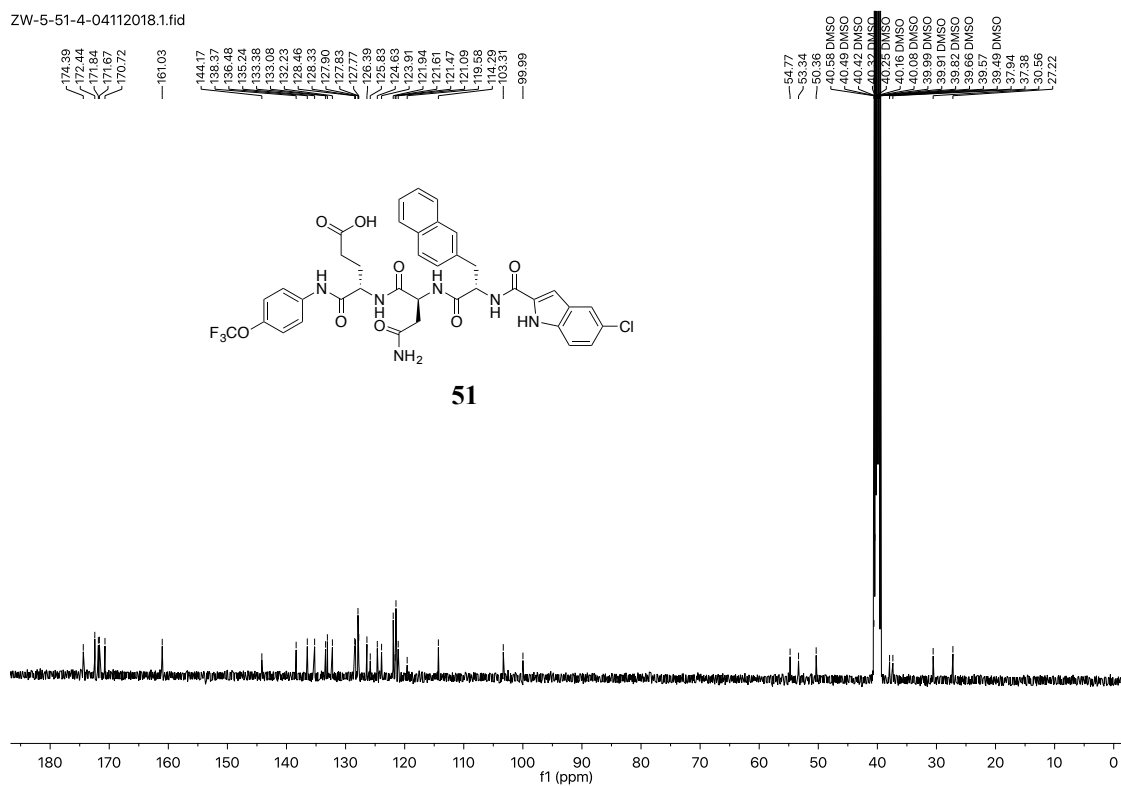

ZW-5-64-4-10312018.1.fid

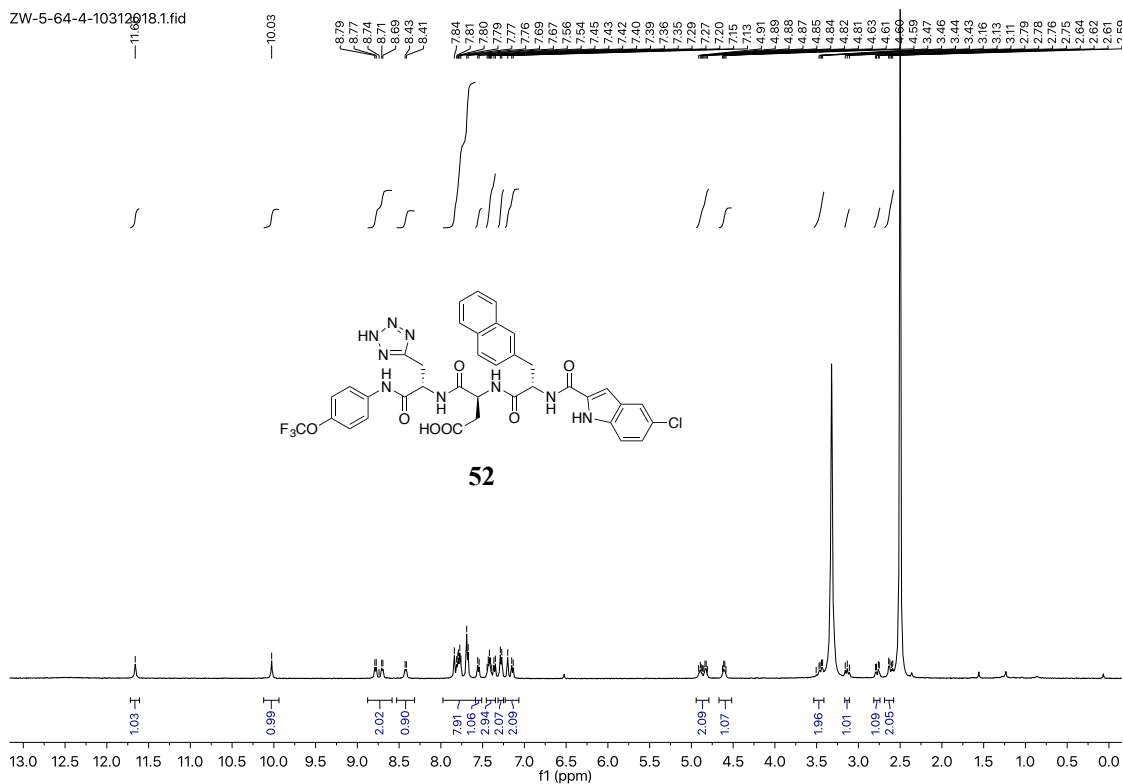

ZW-5-64-4-10172018.2.fid

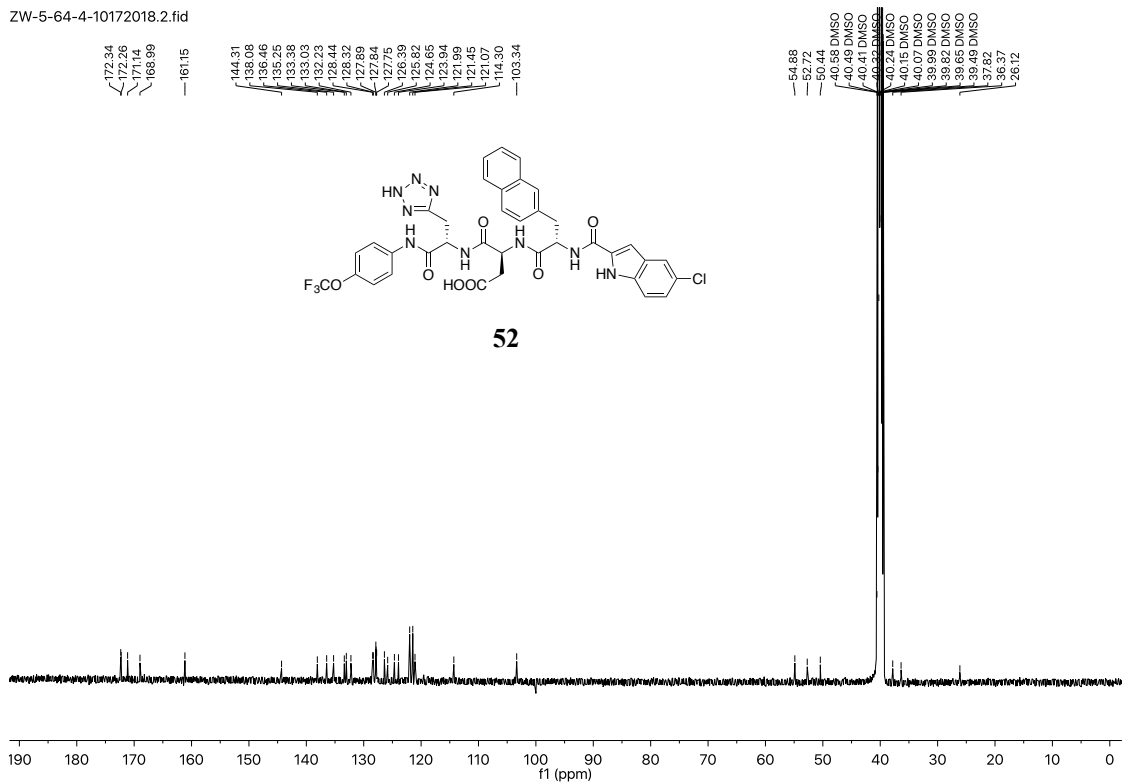



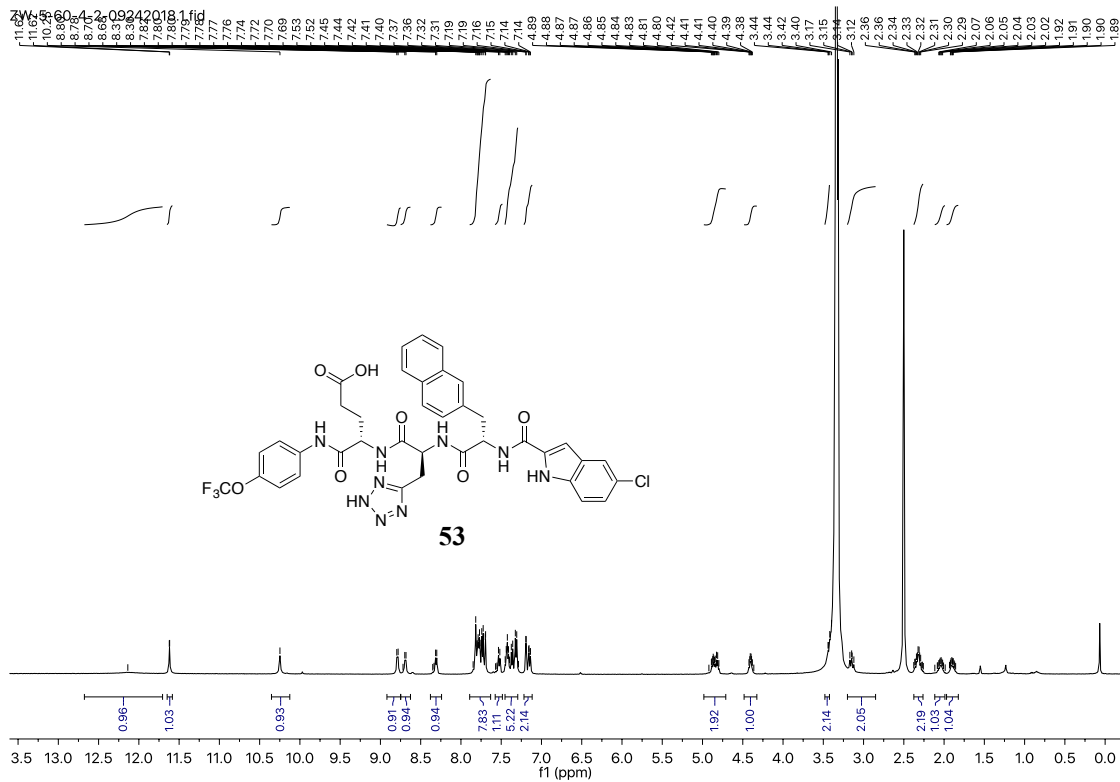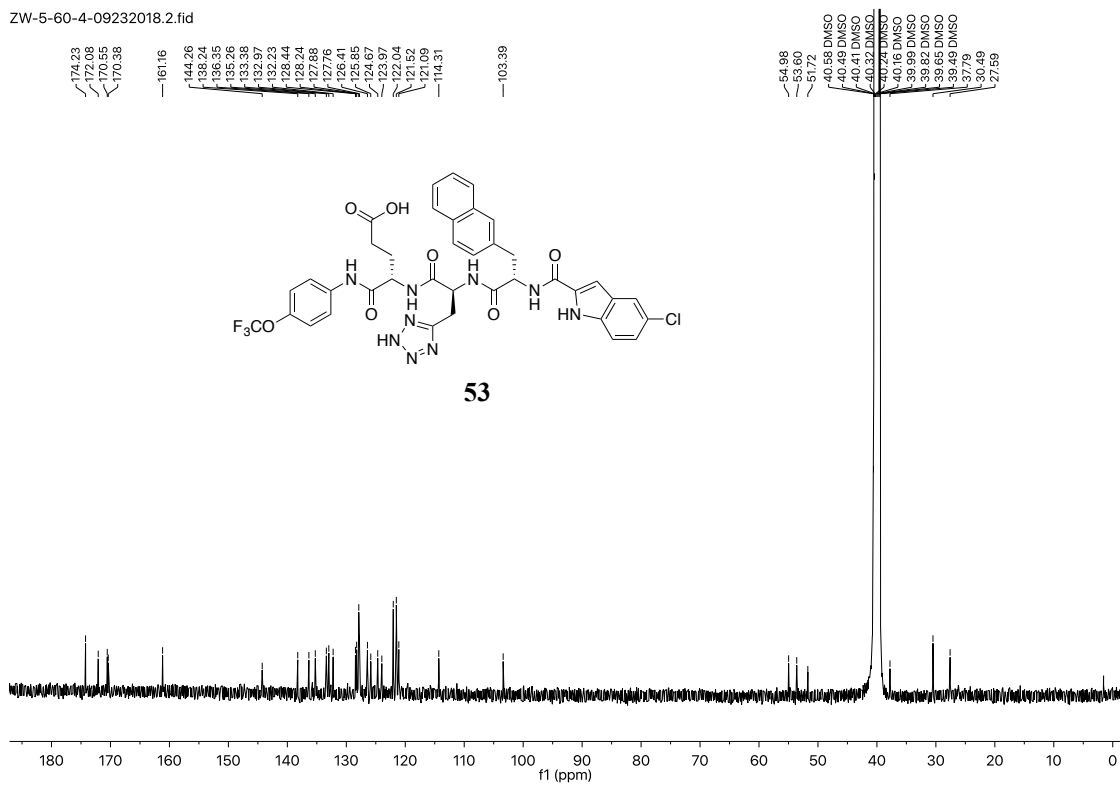

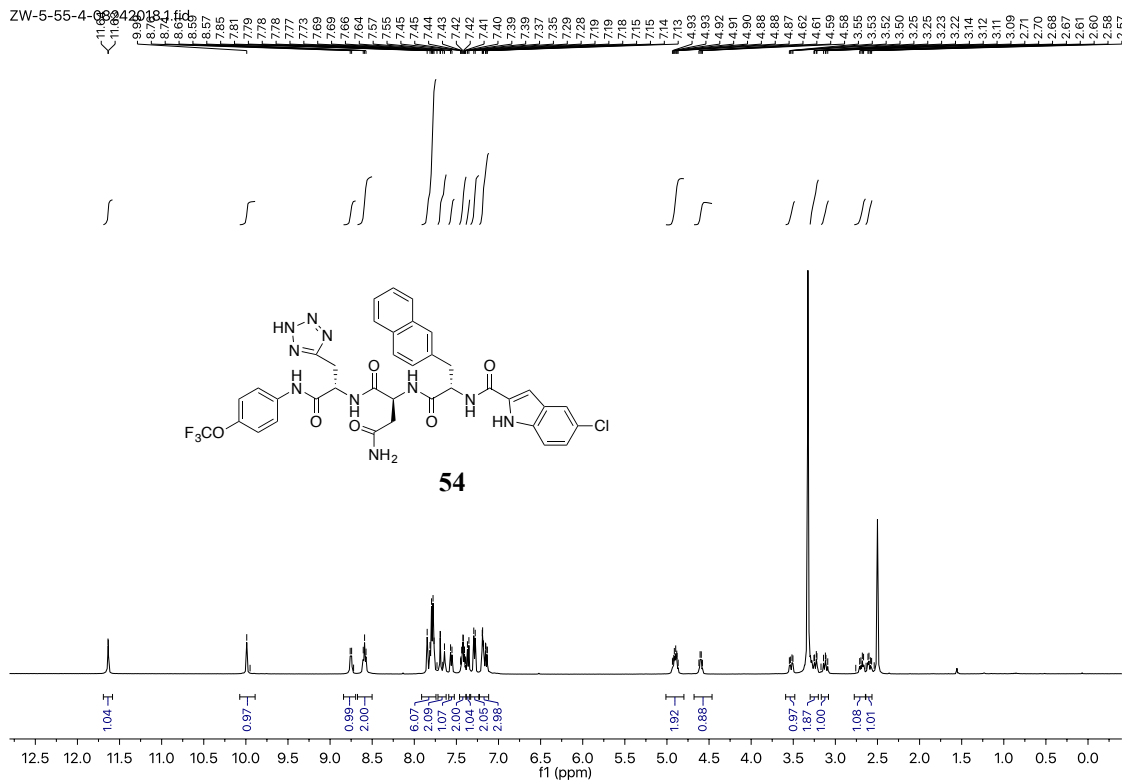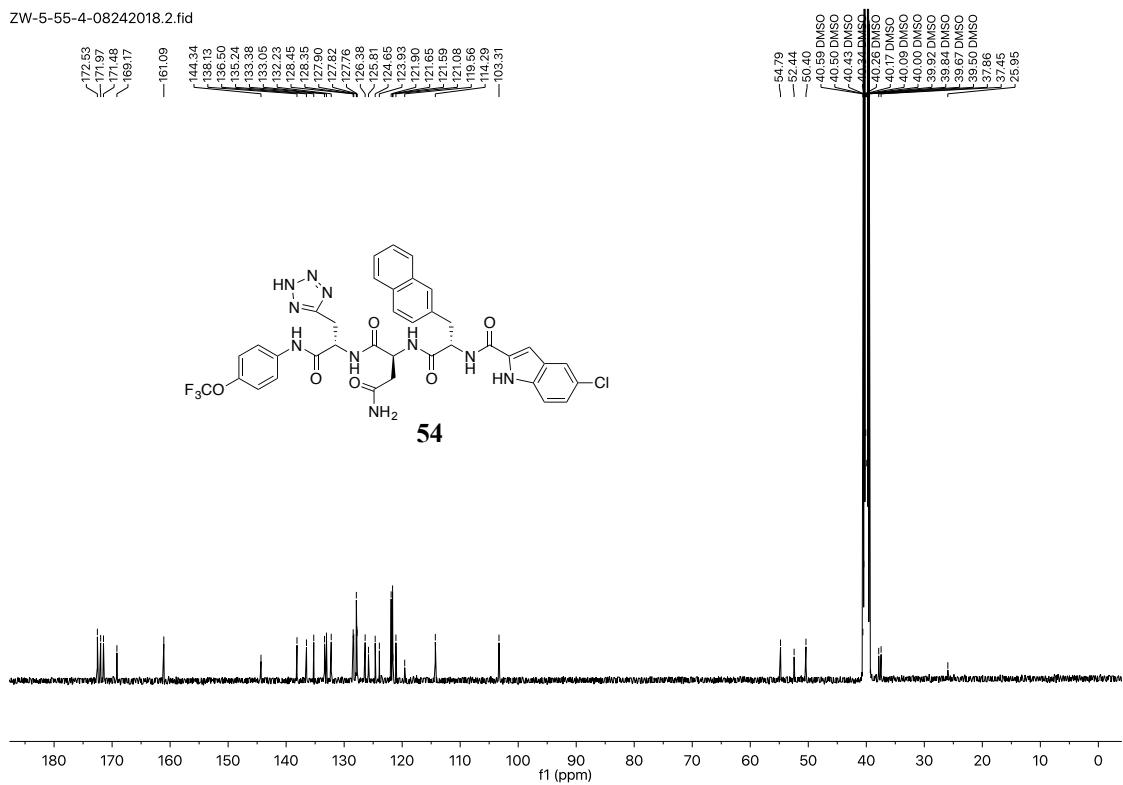



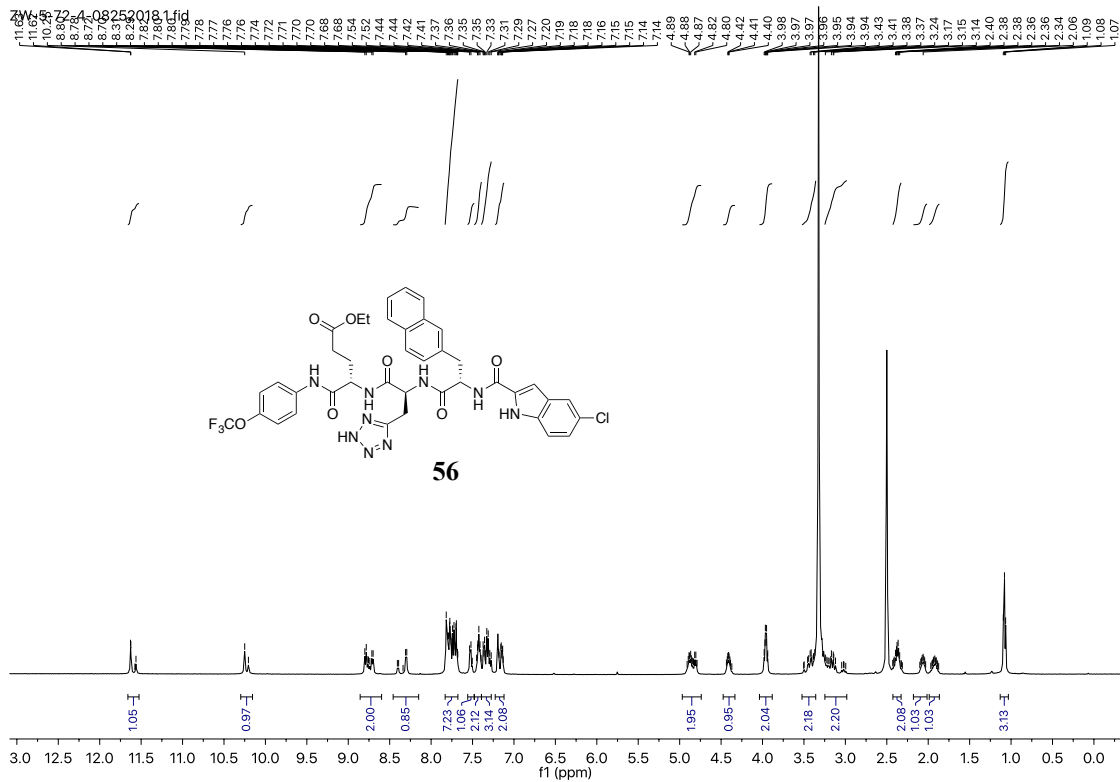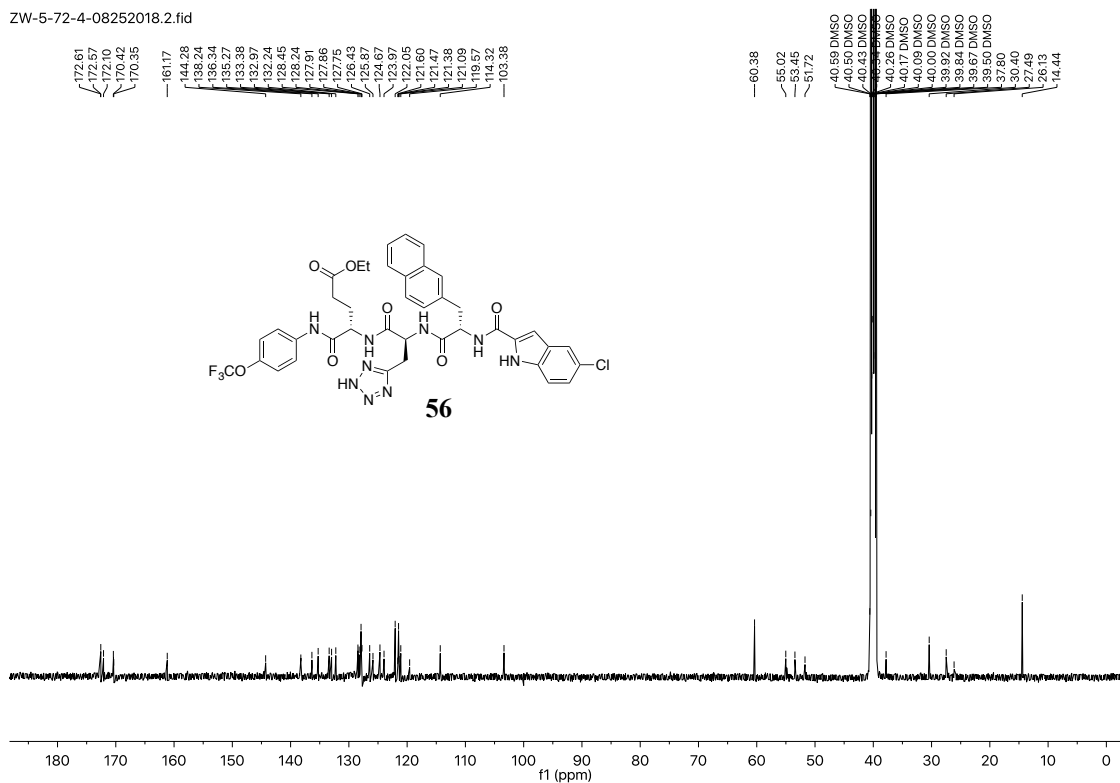

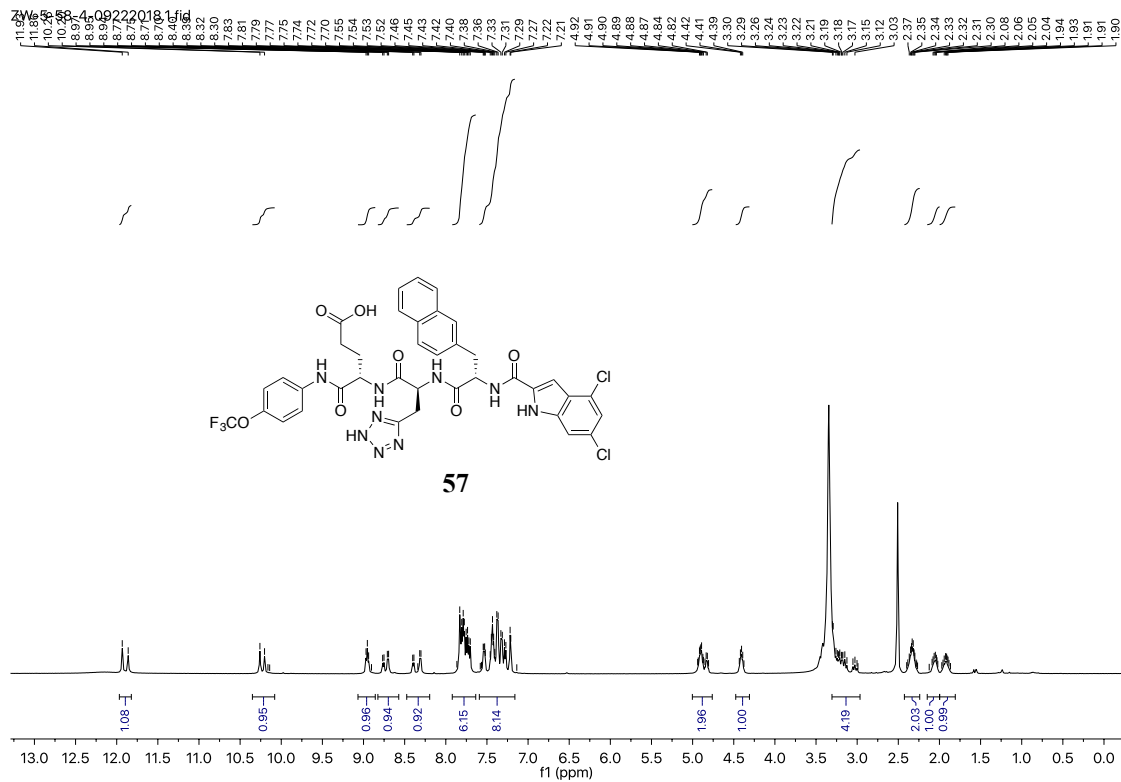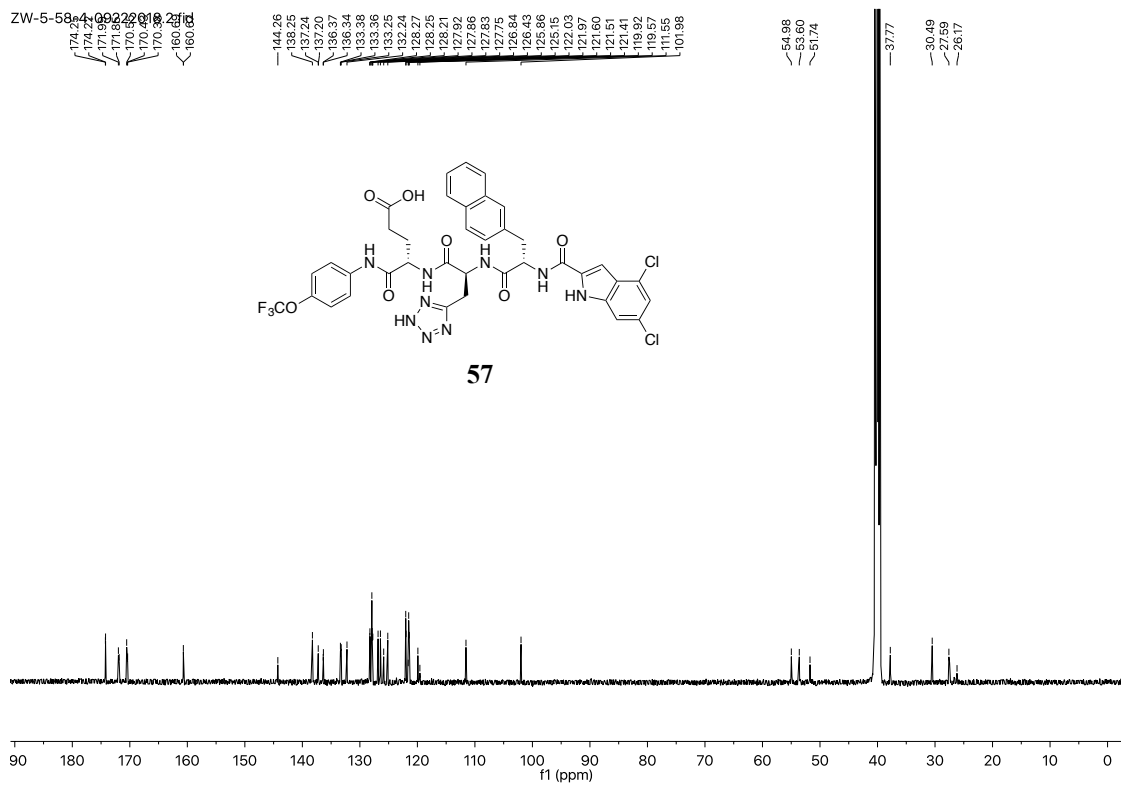

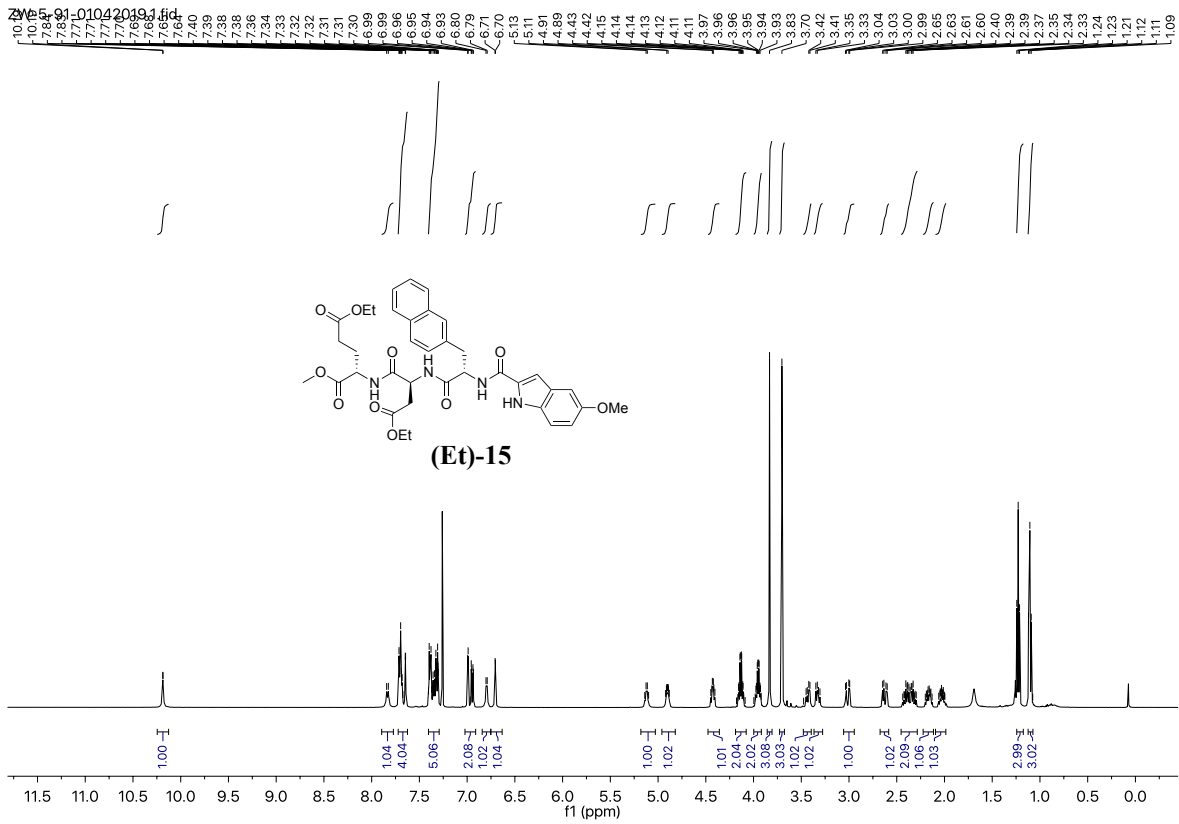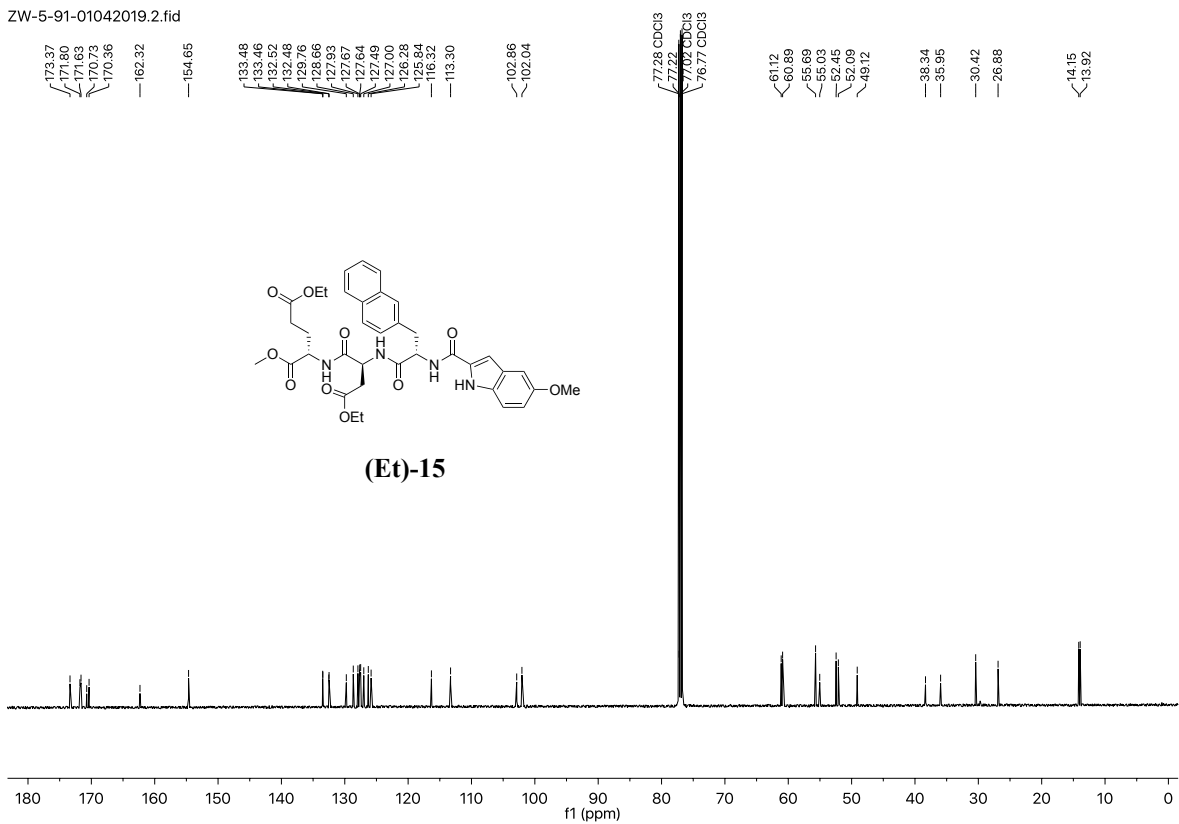

### Supplementary References:

1. Curcio, A.; Sasso, O.; Melisi, D.; Nieddu, M.; La Rana, G.; Russo, R.; Gavini, E.; Boatto, G.; Abignente, E.; Calignano, A.; Rimoli, M. G. Galactosyl prodrug of ketorolac: synthesis, stability, and pharmacological and pharmacokinetic evaluations. *J. Med. Chem.* **2009**, *52*, 3794–3800.
2. Teuscher, K. B.; Zhang, M.; Ji, H. A versatile method to determine the cellular bioavailability of small-molecule inhibitors. *J. Med. Chem.* **2017**, *60*, 157-169.
3. Zhang, M.; Catrow, J. L.; Ji, H. High-throughput selectivity assays for small-molecule inhibitors of  $\beta$ -catenin/T-cell factor protein-protein interactions. *ACS Med. Chem. Lett.* **2013**, *4*, 306-311.
4. Huang, Z.; Zhang, M.; Burton, S. D.; Katsakhyan, L. N.; Ji, H. Targeting the Tcf4 G<sup>13</sup>ANDE<sup>17</sup> binding site to selectively disrupt beta-catenin/T-cell factor protein-protein interactions. *ACS Chem. Biol.* **2014**, *9*, 193–201.
